# Supplementary material for: Liver Proteome Profile of Growth Restricted and Appropriately Grown Newborn Wistar Rats Associated with Maternal Undernutrition
Source: Preprints.org preprint supplement (doi:10.20944/preprints202103.0023.v1), 2021-03-01
Supplement: Supplementary file 1 [file Supp Table 1.xlsx]

## Sheet: quantified proteins (log2ratio)
Accession	Description	Σ# Unique Peptides	Σ# PSMs	FGR1/C	FGR2/C	FGR3/C	FGR4/C	non-FGR1/C	non-FGR2/C	non-FGR3/C	non-FGR4/C
A0A096MJY1	Glypican 6 OS=Rattus norvegicus OX=10116 GN=Gpc6 PE=1 SV=1 - [A0A096MJY1_RAT]	7	23	1.31324	0.690069	1.28589	1.17274	1.09522	1.29601	1.20965	1.07495
O08629	Transcription intermediary factor 1-beta OS=Rattus norvegicus OX=10116 GN=Trim28 PE=1 SV=2 - [TIF1B_RAT]	21	105	0.408942	0.124141	0.227855	0.376857	0.476129	0.530348	0.541987	0.556455
P07871	3-ketoacyl-CoA thiolase B, peroxisomal OS=Rattus norvegicus OX=10116 GN=Acaa1b PE=1 SV=2 - [THIKB_RAT]	2	399	-1.64035	-1.54906	-1.11119	-1.5067	-2.04419	-2.08181	-2.14443	-1.88267
G3V824	Insulin-like growth factor 2 receptor OS=Rattus norvegicus OX=10116 GN=Igf2r PE=1 SV=1 - [G3V824_RAT]	59	186	0.209619	0.382379	0.464095	0.414123	0.498922	0.555693	0.529535	0.535936
F6QBA3	Perilipin OS=Rattus norvegicus OX=10116 GN=Plin2 PE=1 SV=1 - [F6QBA3_RAT]	13	30	-2.82593	-2.61186	-2.73619	-2.41933	-2.69611	-2.83799	-2.86896	-2.81119
A0A0G2JT89	Prominin 1 OS=Rattus norvegicus OX=10116 GN=Prom1 PE=4 SV=1 - [A0A0G2JT89_RAT]	3	7	0.519614	0.020232	0.681603	0.664331	0.832011	0.975706	0.940156	1.09035
A0JN25	Microtubule-associated protein OS=Rattus norvegicus OX=10116 GN=Mapt PE=1 SV=1 - [A0JN25_RAT]	2	2	-2.06559	-0.803853	-1.72166	-1.81101	-1.84994	-2.095	-1.9397	-1.99668
Q5XI73	Rho GDP-dissociation inhibitor 1 OS=Rattus norvegicus OX=10116 GN=Arhgdia PE=1 SV=1 - [GDIR1_RAT]	7	27	1.26979	0.688209	0.632521	0.731563	0.679175	0.678988	0.545661	0.685022
P54921	Alpha-soluble NSF attachment protein OS=Rattus norvegicus OX=10116 GN=Napa PE=1 SV=2 - [SNAA_RAT]	13	50	0.799386	0.606092	0.821179	0.948276	0.875377	0.84452	0.856907	0.848302
E3W9F8	Laminin, alpha 1 OS=Rattus norvegicus OX=10116 GN=Lama1 PE=2 SV=1 - [E3W9F8_RAT]	6	17	0.772399	0.487521	0.754113	0.783004	0.89212	0.904774	0.860012	1.09266
P68511	14-3-3 protein eta OS=Rattus norvegicus OX=10116 GN=Ywhah PE=1 SV=2 - [1433F_RAT]	9	108	0.484453	0.139689	0.125723	0.244145	0.328338	0.415752	0.396955	0.301488
F1LS98	Protein kinase C OS=Rattus norvegicus OX=10116 GN=Prkca PE=1 SV=3 - [F1LS98_RAT]	7	25	0.28563	0.533886	0.61115	0.440789	0.549383	0.581794	0.590815	0.63743
D3ZM07	MAPK-regulated co-repressor-interacting protein 2 OS=Rattus norvegicus OX=10116 GN=Mcrip2 PE=1 SV=1 - [D3ZM07_RAT]	2	3	-0.398546	-0.0648184	-0.753912	-0.916033	-0.944251	-0.956437	-1.14315	-1.14281
P70473	Alpha-methylacyl-CoA racemase OS=Rattus norvegicus OX=10116 GN=Amacr PE=1 SV=3 - [AMACR_RAT]	10	27	-0.0753521	-0.453634	-0.0447392	-0.619594	-0.8647	-0.718047	-0.804552	-0.772956
A0A0G2K5J0	Sulfotransferase OS=Rattus norvegicus OX=10116 GN=Sult1c3 PE=1 SV=1 - [A0A0G2K5J0_RAT]	2	5	-1.54641	-1.85237	-1.31726	-1.70967	-1.66162	-1.44177	-1.55205	-1.39607
D3ZIC4	Protein phosphatase 1, regulatory (Inhibitor) subunit 12B (Predicted) OS=Rattus norvegicus OX=10116 GN=Ppp1r12b PE=1 SV=1 - [D3ZIC4_RAT]	10	29	-1.85621	-1.01188	-1.18796	-1.30747	-1.19943	-1.18632	-1.09391	-1.29632
Q9JHZ9	Sodium-coupled neutral amino acid transporter 3 OS=Rattus norvegicus OX=10116 GN=Slc38a3 PE=2 SV=1 - [S38A3_RAT]	7	35	1.05648	1.53927	1.13769	1.17359	1.00766	0.848374	0.836449	0.916047
Q9JJ09	Sodium-dependent phosphate transport protein 2B OS=Rattus norvegicus OX=10116 GN=Slc34a2 PE=1 SV=1 - [NPT2B_RAT]	2	3	-2.15054	-1.89818	-2.12667	-2.20309	-1.89957	-1.60369	-1.51068	-1.67968
O88989	Malate dehydrogenase, cytoplasmic OS=Rattus norvegicus OX=10116 GN=Mdh1 PE=1 SV=3 - [MDHC_RAT]	18	82	0.358295	-0.0645637	-0.204991	-0.155986	-0.405163	-0.466178	-0.500428	-0.445841
F1LQC1	Acyl-coenzyme A oxidase OS=Rattus norvegicus OX=10116 GN=Acox1 PE=1 SV=3 - [F1LQC1_RAT]	19	53	-1.57579	-1.32458	-1.2473	-1.50935	-1.61764	-1.46591	-1.25763	-1.45298
A0A0G2K093	Heat shock 70 kDa protein 13 OS=Rattus norvegicus OX=10116 GN=Hspa13 PE=1 SV=1 - [A0A0G2K093_RAT]	8	20	0.628606	0.285709	0.689547	0.637447	0.538793	0.661934	0.572502	0.561239
D3ZE26	Similar to RIKEN cDNA 1110063G11 (Predicted) OS=Rattus norvegicus OX=10116 GN=Tmcc2 PE=1 SV=1 - [D3ZE26_RAT]	6	15	0.966352	0.404482	0.764173	0.992	0.823653	0.681572	0.706715	0.742565
A0JPM9	Eukaryotic translation initiation factor 3 subunit J OS=Rattus norvegicus OX=10116 GN=Eif3j PE=1 SV=1 - [EIF3J_RAT]	8	39	-0.622117	-0.559389	-0.6533	-0.536368	-0.69292	-0.860519	-0.809891	-0.820818
A0A140TAA1	Immunoglobulin superfamily, member 8 OS=Rattus norvegicus OX=10116 GN=Igsf8 PE=1 SV=1 - [A0A140TAA1_RAT]	1	1	1.07997	0.838581	1.14219	1.03696	0.690246	0.771254	0.797134	0.943682
D4A3V0	Eva-1 homolog A, regulator of programmed cell death OS=Rattus norvegicus OX=10116 GN=Eva1a PE=1 SV=1 - [D4A3V0_RAT]	2	7	1.39508	1.1248	1.40829	1.28028	1.31567	1.48586	1.49509	1.62185
B0BNB2	Density-regulated protein OS=Rattus norvegicus OX=10116 GN=Denr PE=2 SV=1 - [B0BNB2_RAT]	4	7	-0.860175	-0.697415	-0.845938	-0.683467	-0.932899	-1.04327	-1.11831	-1.14835
D4ACQ9	GA repeat binding protein, alpha (Predicted) OS=Rattus norvegicus OX=10116 GN=Gabpa PE=1 SV=1 - [D4ACQ9_RAT]	6	14	0.212291	-0.056742	0.292926	0.359926	0.482334	0.563511	0.511063	0.519474
P68255	14-3-3 protein theta OS=Rattus norvegicus OX=10116 GN=Ywhaq PE=1 SV=1 - [1433T_RAT]	11	194	0.976088	0.51879	0.403603	0.64477	0.558434	0.472518	0.459005	0.466773
Q4KLN4	Nucleoporin GLE1 OS=Rattus norvegicus OX=10116 GN=Gle1 PE=2 SV=1 - [GLE1_RAT]	6	15	0.0443225	0.0228462	0.721152	0.439416	0.475185	0.561718	0.572596	0.637855
Q9EQ25	Sodium-coupled neutral amino acid transporter 4 OS=Rattus norvegicus OX=10116 GN=Slc38a4 PE=1 SV=1 - [S38A4_RAT]	2	4	0.0809666	-0.0260238	0.179095	0.352147	0.669592	0.8374	0.849118	0.722521
Q66HF3	Electron transfer flavoprotein-ubiquinone oxidoreductase, mitochondrial OS=Rattus norvegicus OX=10116 GN=Etfdh PE=1 SV=1 - [Q66HF3_RAT]	25	199	-0.0522715	-0.25886	0.0540192	-0.390933	-0.620191	-0.527817	-0.513433	-0.512961
P04182	Ornithine aminotransferase, mitochondrial OS=Rattus norvegicus OX=10116 GN=Oat PE=1 SV=1 - [OAT_RAT]	17	60	1.58788	1.2512	1.5428	0.881868	0.467303	0.570596	0.606504	0.678119
A0A0A0MY09	Endoplasmin OS=Rattus norvegicus OX=10116 GN=Hsp90b1 PE=1 SV=1 - [A0A0A0MY09_RAT]	51	785	1.03106	0.897394	1.04877	1.07695	0.74158	0.61603	0.616387	0.676016
A0A0F7R5I4	Alanine/serine/cysteine/threonine transporter 1 OS=Rattus norvegicus OX=10116 GN=ratASCT1 PE=2 SV=1 - [A0A0F7R5I4_RAT]	5	18	1.02326	1.65504	1.35383	1.20153	0.836444	0.719452	0.670045	0.608257
Q63135	Complement component receptor 1-like protein OS=Rattus norvegicus OX=10116 GN=Cr1l PE=1 SV=1 - [CR1L_RAT]	8	21	0.760204	0.573086	0.840168	0.715858	0.818431	0.889749	0.793182	0.833679
F1M3Q1	Interferon-induced transmembrane protein 1 OS=Rattus norvegicus OX=10116 GN=Ifitm1 PE=4 SV=2 - [F1M3Q1_RAT]	2	12	0.664766	1.12845	1.13773	0.775015	0.629579	0.647968	0.617537	0.540529
O35186	Cathepsin K OS=Rattus norvegicus OX=10116 GN=Ctsk PE=2 SV=1 - [CATK_RAT]	3	5	-0.919169	-0.999743	-0.856388	-0.760762	-1.06989	-0.927975	-0.78577	-0.737831
Q5XFV6	Mitochondrial ribosomal protein L34 OS=Rattus norvegicus OX=10116 GN=Mrpl34 PE=2 SV=1 - [Q5XFV6_RAT]	1	2	-1.56225	-0.761279	-0.996323	-1.0795	-1.45603	-1.65813	-1.7613	-1.62415
Q9ESY8	Stau1 protein OS=Rattus norvegicus OX=10116 GN=Stau1 PE=2 SV=1 - [Q9ESY8_RAT]	9	20	-0.256175	-0.451474	-0.680307	-0.31374	-0.478641	-0.604782	-0.62276	-0.661825
Q499N6	UBX domain-containing protein 1 OS=Rattus norvegicus OX=10116 GN=Ubxn1 PE=3 SV=2 - [UBXN1_RAT]	7	12	-0.397246	-0.296865	-0.933939	-0.575917	-0.721483	-0.880621	-0.885456	-0.822565
B0BN74	Bag2 protein OS=Rattus norvegicus OX=10116 GN=Bag2 PE=2 SV=1 - [B0BN74_RAT]	7	21	0.296956	0.561302	0.416293	0.556348	0.549084	0.632486	0.642946	0.585001
P40241	CD9 antigen OS=Rattus norvegicus OX=10116 GN=Cd9 PE=1 SV=2 - [CD9_RAT]	5	17	0.932291	1.27231	1.06432	0.538506	0.917223	1.21774	1.17236	1.15544
G3V6C2	Homogentisate 1, 2-dioxygenase OS=Rattus norvegicus OX=10116 GN=Hgd PE=1 SV=1 - [G3V6C2_RAT]	6	14	0.115932	-0.334802	-0.398265	-0.801133	-0.915305	-0.731354	-0.764129	-0.672848
A0A0G2JWA8	Microtubule-actin cross-linking factor 1 OS=Rattus norvegicus OX=10116 GN=Macf1 PE=1 SV=1 - [A0A0G2JWA8_RAT]	71	139	0.067493	0.281619	0.220096	0.191169	0.41686	0.48645	0.464002	0.472309
Q8CHM7	2-hydroxyacyl-CoA lyase 1 OS=Rattus norvegicus OX=10116 GN=Hacl1 PE=1 SV=1 - [HACL1_RAT]	15	75	-0.484058	-0.533617	-0.250004	-0.579783	-0.699066	-0.62881	-0.625936	-0.605236
M0R6B4	Uncharacterized protein OS=Rattus norvegicus OX=10116 PE=4 SV=2 - [M0R6B4_RAT]	2	22	-0.0557423	0.159346	-0.312775	-0.302706	-0.410393	-0.446721	-0.495102	-0.427679
A0A0G2K470	Integrin subunit alpha 2 OS=Rattus norvegicus OX=10116 GN=Itga2 PE=3 SV=1 - [A0A0G2K470_RAT]	7	16	0.602426	0.123833	0.252419	0.207056	0.42861	0.491748	0.416221	0.466574
Q5XI36	CD97 molecule OS=Rattus norvegicus OX=10116 GN=Adgre5 PE=2 SV=1 - [Q5XI36_RAT]	3	9	1.05431	0.438221	1.10244	0.879875	1.01677	1.30429	1.2516	1.13891
Q5U2U0	ATP-dependent Clp protease ATP-binding subunit clpX-like, mitochondrial OS=Rattus norvegicus OX=10116 GN=Clpx PE=2 SV=1 - [CLPX_RAT]	16	39	-0.334528	-0.212862	-0.385889	-0.423348	-0.499156	-0.451324	-0.474376	-0.487118
Q9ES53	Ubiquitin recognition factor in ER-associated degradation protein 1 OS=Rattus norvegicus OX=10116 GN=Ufd1 PE=1 SV=1 - [UFD1_RAT]	5	13	-0.445541	-0.456229	-0.462601	-0.434242	-0.417728	-0.427713	-0.618185	-0.574499
Q5EBA4	Nipsnap1 protein (Fragment) OS=Rattus norvegicus OX=10116 GN=Nipsnap1 PE=2 SV=1 - [Q5EBA4_RAT]	10	33	-0.335634	-0.134223	-0.505923	-0.754999	-0.645125	-0.560493	-0.508609	-0.586075
Q6P136	Hyou1 protein OS=Rattus norvegicus OX=10116 GN=Hyou1 PE=1 SV=1 - [Q6P136_RAT]	2	132	0.738444	0.903436	1.07945	1.00781	0.702335	0.686691	0.660807	0.66041
Q9QZV0	Ad1-antigen (Fragment) OS=Rattus norvegicus OX=10116 PE=2 SV=1 - [Q9QZV0_RAT]	1	3	0.754734	0.25539	-0.00442544	0.368468	0.785548	0.954014	1.12103	0.887598
Q62931	Golgi SNAP receptor complex member 1 OS=Rattus norvegicus OX=10116 GN=Gosr1 PE=1 SV=1 - [GOSR1_RAT]	7	11	0.742147	0.606695	0.642572	0.480557	0.551375	0.65429	0.708024	0.606854
Q45QK8	Guanine nucleotide-binding protein subunit gamma (Fragment) OS=Rattus norvegicus OX=10116 GN=Gng5 PE=2 SV=1 - [Q45QK8_RAT]	3	6	0.378543	0.114992	0.642466	0.633413	0.547103	0.611287	0.655381	0.582326
Q6IN10	Endothelin converting enzyme 1, isoform CRA_a OS=Rattus norvegicus OX=10116 GN=Ece1 PE=1 SV=1 - [Q6IN10_RAT]	18	40	0.772139	0.578347	1.05587	0.685286	0.671784	0.868133	0.871383	0.832673
Q9Z2M4	Peroxisomal 2,4-dienoyl-CoA reductase OS=Rattus norvegicus OX=10116 GN=Decr2 PE=2 SV=1 - [DECR2_RAT]	10	34	-0.361565	-0.0685533	-0.0530552	-0.536034	-0.54578	-0.45313	-0.494406	-0.5979
G3V7L1	Utrophin OS=Rattus norvegicus OX=10116 GN=Utrn PE=1 SV=3 - [G3V7L1_RAT]	37	76	0.144703	0.360997	0.400164	0.255858	0.301802	0.359835	0.377486	0.362617
B4F7F0	Claudin OS=Rattus norvegicus OX=10116 GN=Cldn6 PE=2 SV=1 - [B4F7F0_RAT]	1	2	0.944424	0.91193	0.529521	0.986254	1.10846	0.960938	0.99324	0.943979
A0A0G2K8W9	Spectrin beta chain OS=Rattus norvegicus OX=10116 GN=Sptbn1 PE=1 SV=1 - [A0A0G2K8W9_RAT]	95	562	-0.126828	0.177392	0.286142	0.193425	0.34691	0.449982	0.451527	0.467391
A0A0G2JYL4	Prolyl 4-hydroxylase subunit alpha 2 OS=Rattus norvegicus OX=10116 GN=P4ha2 PE=1 SV=1 - [A0A0G2JYL4_RAT]	9	21	0.481776	0.412287	0.624113	0.364925	0.504136	0.711163	0.61325	0.594573
A0A0A0MXX1	A-kinase anchor protein 7 isoforms delta and gamma OS=Rattus norvegicus OX=10116 GN=Akap7 PE=4 SV=1 - [A0A0A0MXX1_RAT]	2	3	0.919946	0.869874	1.27167	0.984174	0.817383	0.700039	0.728465	0.901975
D3ZJH9	Malic enzyme OS=Rattus norvegicus OX=10116 GN=Me2 PE=1 SV=1 - [D3ZJH9_RAT]	15	29	0.685679	0.274212	0.939406	0.547717	0.695714	0.879069	0.86725	0.831934
P70566	Tropomodulin-2 OS=Rattus norvegicus OX=10116 GN=Tmod2 PE=1 SV=1 - [TMOD2_RAT]	2	14	-1.77486	-1.65163	-1.36622	-1.78145	-1.461	-1.54142	-1.50975	-1.05148
P35171	Cytochrome c oxidase subunit 7A2, mitochondrial OS=Rattus norvegicus OX=10116 GN=Cox7a2 PE=1 SV=1 - [CX7A2_RAT]	2	24	-0.116745	0.200403	-0.110694	-0.285701	-0.417521	-0.418549	-0.382606	-0.332907
D4A7J8	PRP4 pre-mRNA processing factor 4 homolog (Yeast) OS=Rattus norvegicus OX=10116 GN=Prpf4 PE=1 SV=1 - [D4A7J8_RAT]	10	24	-0.190567	-0.0432557	0.0245898	0.403729	0.335517	0.365539	0.359701	0.328536
P56627	Aquaporin-9 OS=Rattus norvegicus OX=10116 GN=Aqp9 PE=2 SV=1 - [AQP9_RAT]	4	18	1.01074	0.953041	0.929481	0.759221	0.93685	1.14459	1.07419	1.36285
Q5RJZ3	Tetraspanin (Fragment) OS=Rattus norvegicus OX=10116 GN=Tspan6 PE=2 SV=1 - [Q5RJZ3_RAT]	4	10	0.14082	0.131245	0.298054	0.256259	0.62918	0.742677	0.775054	0.801397
G3V817	X-ray repair cross-complementing protein 5 OS=Rattus norvegicus OX=10116 GN=Xrcc5 PE=1 SV=1 - [G3V817_RAT]	4	6	0.269048	0.0971401	0.474232	0.331612	0.715621	0.719797	0.758698	0.824373
Q68FQ2	Junctional adhesion molecule C OS=Rattus norvegicus OX=10116 GN=Jam3 PE=1 SV=1 - [JAM3_RAT]	2	4	0.463727	0.445576	0.504731	0.349385	0.540227	0.661377	0.658726	0.543656
D3ZAC0	Integrin subunit alpha 2b OS=Rattus norvegicus OX=10116 GN=Itga2b PE=1 SV=2 - [D3ZAC0_RAT]	18	53	0.900268	0.329979	0.517308	0.375061	1.06358	1.46799	1.42188	1.45533
Q2MH90	14.7K-interacting protein-2 type B variant (Fragment) OS=Rattus norvegicus OX=10116 GN=FIP-2B variant PE=2 SV=1 - [Q2MH90_RAT]	12	19	-0.230161	-0.53581	-1.11619	-0.982762	-0.945702	-1.02014	-1.11125	-1.13272
M0RA15	Uncharacterized protein OS=Rattus norvegicus OX=10116 PE=4 SV=1 - [M0RA15_RAT]	2	3	-0.837743	-1.0432	-1.39251	-0.149676	-0.726024	-1.08079	-1.07216	-0.935926
Q4KM62	Palmdelphin OS=Rattus norvegicus OX=10116 GN=Palmd PE=1 SV=1 - [PALMD_RAT]	8	24	-0.698579	-0.505955	-0.730315	-0.895743	-1.14792	-1.14838	-1.22431	-1.16607
M0RA42	Unc-93 homolog A OS=Rattus norvegicus OX=10116 GN=Unc93a PE=4 SV=1 - [M0RA42_RAT]	1	2	0.69345	0.988309	0.756154	0.872913	0.799963	0.912308	0.853796	0.818163
O70352	CD82 antigen OS=Rattus norvegicus OX=10116 GN=Cd82 PE=1 SV=1 - [CD82_RAT]	2	12	0.772338	0.550891	1.05857	0.875722	1.35308	1.65847	1.70138	1.58064
F1LTJ5	Uncharacterized protein OS=Rattus norvegicus OX=10116 PE=1 SV=3 - [F1LTJ5_RAT]	59	447	0.276946	0.0248152	0.666194	0.567209	0.500659	0.613649	0.617764	0.604936
A0A0G2KB64	Transient receptor potential cation channel subfamily M member 7 OS=Rattus norvegicus OX=10116 GN=Trpm7 PE=1 SV=1 - [A0A0G2KB64_RAT]	3	4	0.231769	0.261561	0.508264	0.444651	0.431798	0.4205	0.523014	0.585116
Q71SA3	Thrombospondin 1 OS=Rattus norvegicus OX=10116 GN=Thbs1 PE=2 SV=1 - [Q71SA3_RAT]	6	113	0.376637	0.0444789	0.216791	0.274972	0.874665	1.29935	1.28355	1.19867
D3ZTJ0	Protein XRP2 OS=Rattus norvegicus OX=10116 GN=Rp2 PE=1 SV=3 - [D3ZTJ0_RAT]	4	5	0.594666	0.479145	0.956078	0.634113	0.769097	0.944798	0.828458	0.871875
D3ZCG9	Integrin alpha 3 variant A OS=Rattus norvegicus OX=10116 GN=Itga3 PE=2 SV=1 - [D3ZCG9_RAT]	5	10	0.134376	-0.130382	0.418219	0.481611	0.660297	0.741129	0.588309	0.640338
Q642A4	UPF0598 protein C8orf82 homolog OS=Rattus norvegicus OX=10116 PE=2 SV=1 - [CH082_RAT]	1	6	0.0603063	0.394153	-0.0813837	-0.366878	-0.507189	-0.536534	-0.539907	-0.511578
D3ZZZ9	Catenin (Cadherin associated protein), delta 1 (Predicted), isoform CRA_a OS=Rattus norvegicus OX=10116 GN=Ctnnd1 PE=1 SV=1 - [D3ZZZ9_RAT]	28	106	0.363207	0.370261	0.672391	0.525966	0.428261	0.652824	0.609735	0.503182
Q58HA5	Carbonic anhydrase XII (Fragment) OS=Rattus norvegicus OX=10116 PE=2 SV=1 - [Q58HA5_RAT]	3	7	1.72493	1.59342	1.98431	1.51033	1.21366	1.23786	1.17756	1.15785
P17764	Acetyl-CoA acetyltransferase, mitochondrial OS=Rattus norvegicus OX=10116 GN=Acat1 PE=1 SV=1 - [THIL_RAT]	28	518	-0.472895	-0.603162	-0.518073	-0.4608	-0.549957	-0.610052	-0.635591	-0.606488
B2GUU9	Cryptochrome 2 (Photolyase-like) OS=Rattus norvegicus OX=10116 GN=Cry2 PE=1 SV=1 - [B2GUU9_RAT]	1	1	1.06061	0.637021	0.846577	0.821467	1.28814	1.61926	1.54633	1.81931
A0A0G2K782	Zinc finger, C2HC-type-containing 1A OS=Rattus norvegicus OX=10116 GN=Zc2hc1a PE=1 SV=1 - [A0A0G2K782_RAT]	1	1	-1.59311	-1.27858	-1.07078	-1.76233	-1.7592	-1.61447	-1.40101	-1.39265
Q6IMX7	Hsp70-binding protein 1 OS=Rattus norvegicus OX=10116 GN=Hspbp1 PE=1 SV=1 - [HPBP1_RAT]	2	4	0.941997	0.459078	0.760406	0.614652	0.704014	0.745528	0.714194	0.754487
A0A0G2K6U1	Vesicle-fusing ATPase OS=Rattus norvegicus OX=10116 GN=Nsf PE=1 SV=1 - [A0A0G2K6U1_RAT]	31	100	0.524499	0.776849	0.986912	0.595187	0.646198	0.712919	0.779538	0.706325
F1LYK3	Neuron navigator 1 OS=Rattus norvegicus OX=10116 GN=Nav1 PE=1 SV=2 - [F1LYK3_RAT]	3	3	-0.964953	-0.479611	-0.613184	-0.399359	-0.470143	-0.615836	-0.663448	-0.528248
B2RYM3	Inter-alpha trypsin inhibitor, heavy chain 1 OS=Rattus norvegicus OX=10116 GN=Itih1 PE=1 SV=1 - [B2RYM3_RAT]	12	21	-0.853399	-0.830315	-0.539202	-0.628811	-0.45048	-0.409746	-0.455141	-0.408198
P07379	Phosphoenolpyruvate carboxykinase, cytosolic [GTP] OS=Rattus norvegicus OX=10116 GN=Pck1 PE=1 SV=1 - [PCKGC_RAT]	8	19	-1.65999	-1.54551	-1.4615	-2.15333	-2.06164	-1.87364	-1.8626	-1.78089
Q5XIF3	NADH dehydrogenase [ubiquinone] iron-sulfur protein 4, mitochondrial OS=Rattus norvegicus OX=10116 GN=Ndufs4 PE=1 SV=1 - [NDUS4_RAT]	8	35	-0.796564	-0.551073	-0.705542	-0.545123	-0.88168	-1.12317	-0.993364	-1.16875
Q56R18	Importin subunit alpha OS=Rattus norvegicus OX=10116 GN=Kpna3 PE=1 SV=1 - [Q56R18_RAT]	2	14	0.720406	0.528772	0.390542	0.470618	0.452908	0.569018	0.526715	0.691338
B2RZD5	RCG41580, isoform CRA_a OS=Rattus norvegicus OX=10116 GN=Rpl22l1 PE=2 SV=1 - [B2RZD5_RAT]	3	8	-0.90861	-0.732534	-0.80253	-0.561577	-0.683934	-0.74238	-0.810959	-0.869795
Q63081	Protein disulfide-isomerase A6 OS=Rattus norvegicus OX=10116 GN=Pdia6 PE=1 SV=2 - [PDIA6_RAT]	19	324	0.953087	0.740965	0.846867	0.89401	0.647949	0.587795	0.528003	0.557763
A0A0G2JXG3	Cell cycle control protein OS=Rattus norvegicus OX=10116 GN=Tmem30a PE=1 SV=1 - [A0A0G2JXG3_RAT]	6	22	0.489842	0.130497	0.626644	0.340504	0.480193	0.585514	0.544414	0.530214
A0A0G2KA83	Fibrinogen-like protein 1 OS=Rattus norvegicus OX=10116 GN=Fgl1 PE=1 SV=1 - [A0A0G2KA83_RAT]	3	8	-0.401003	-0.447234	0.00408036	-0.734499	-0.83692	-0.584379	-0.705744	-0.618211
Q6AYD3	Proliferation-associated protein 2G4 OS=Rattus norvegicus OX=10116 GN=Pa2g4 PE=1 SV=1 - [PA2G4_RAT]	11	37	-0.45498	-0.412753	-0.7517	-0.36107	-0.559881	-0.737012	-0.760555	-0.779695
A0A0G2K756	Acyl-Coenzyme A binding domain containing 3 OS=Rattus norvegicus OX=10116 GN=Acbd3 PE=1 SV=1 - [A0A0G2K756_RAT]	8	29	0.444933	0.55208	0.295909	0.417844	0.431167	0.395482	0.397686	0.444297
Q4V887	Zinc transporter ZIP6 OS=Rattus norvegicus OX=10116 GN=Slc39a6 PE=1 SV=1 - [S39A6_RAT]	1	2	0.272515	0.296239	0.489647	0.430599	0.328883	0.367737	0.356812	0.297987
G3V852	RCG55135, isoform CRA_b OS=Rattus norvegicus OX=10116 GN=Tln1 PE=1 SV=1 - [G3V852_RAT]	75	319	0.370743	0.0941726	0.167009	0.129345	0.523224	0.71637	0.714344	0.655303
G3V6W7	Cleavage and polyadenylation specificity factor 3, isoform CRA_a OS=Rattus norvegicus OX=10116 GN=Cpsf3 PE=1 SV=1 - [G3V6W7_RAT]	8	18	-0.0207325	-0.00745959	-0.0751269	0.241364	0.433628	0.469446	0.494368	0.632963
A0A0G2K2S2	Solute carrier family 2, facilitated glucose transporter member 1 OS=Rattus norvegicus OX=10116 GN=Slc2a1 PE=1 SV=1 - [A0A0G2K2S2_RAT]	3	11	0.871899	1.67177	1.33991	1.12766	0.812026	0.762905	0.717469	0.814603
A0A1B0GWU0	Centriolin OS=Rattus norvegicus OX=10116 GN=Cntrl PE=4 SV=1 - [A0A1B0GWU0_RAT]	5	13	0.365928	0.071898	0.281679	0.170628	0.381238	0.43701	0.468451	0.375367
G3V667	Integrin subunit alpha 6 OS=Rattus norvegicus OX=10116 GN=Itga6 PE=1 SV=1 - [G3V667_RAT]	19	45	0.365193	0.0582527	0.516329	0.347813	0.4376	0.662629	0.700969	0.583256
A0A0G2K8N3	Prolyl 3-hydroxylase 2 OS=Rattus norvegicus OX=10116 GN=P3h2 PE=1 SV=1 - [A0A0G2K8N3_RAT]	4	7	0.677244	0.967129	1.12701	0.902996	0.832691	0.695052	0.631487	0.491356
Q9R1J8	Prolyl 3-hydroxylase 1 OS=Rattus norvegicus OX=10116 GN=P3h1 PE=1 SV=1 - [P3H1_RAT]	12	36	0.272046	-0.0451896	0.274339	0.366631	0.445493	0.537263	0.446039	0.477135
O35077	Glycerol-3-phosphate dehydrogenase [NAD(+)], cytoplasmic OS=Rattus norvegicus OX=10116 GN=Gpd1 PE=1 SV=4 - [GPDA_RAT]	12	68	-0.277139	-0.449869	-0.572656	-0.389738	-0.31006	-0.355609	-0.412555	-0.362379
Q6AYQ9	Peptidyl-prolyl cis-trans isomerase OS=Rattus norvegicus OX=10116 GN=Ppic PE=1 SV=1 - [Q6AYQ9_RAT]	6	23	0.118215	-0.253405	0.320631	0.285185	0.571436	0.809858	0.728543	0.765197
B5DEY8	Sorting nexin OS=Rattus norvegicus OX=10116 GN=Snx6 PE=1 SV=1 - [B5DEY8_RAT]	8	17	0.217537	-0.00906453	0.0839339	0.121342	0.186628	0.246765	0.26379	0.264471
D4ADE5	Histone-lysine N-methyltransferase SETD7 OS=Rattus norvegicus OX=10116 GN=Setd7 PE=1 SV=1 - [D4ADE5_RAT]	3	5	0.361942	0.256004	0.0797226	-0.176318	-0.522679	-0.482234	-0.668883	-0.589035
G3V635	Cytochrome P450 3A18 OS=Rattus norvegicus OX=10116 GN=Cyp3a18 PE=1 SV=1 - [G3V635_RAT]	1	3	-1.99907	-1.97441	-2.57136		-1.86245	-2.0071	-2.04798	-1.93748
A0A0G2KA61	Casein kinase II subunit beta OS=Rattus norvegicus OX=10116 GN=Csnk2b PE=1 SV=1 - [A0A0G2KA61_RAT]	5	20	0.356833	0.224522	0.434248	0.68715	0.774717	0.660828	0.635619	0.628345
Q63276	Bile acid-CoA:amino acid N-acyltransferase OS=Rattus norvegicus OX=10116 GN=Baat PE=1 SV=2 - [BAAT_RAT]	6	11	-1.05047	-0.998734	-0.421625	-0.642057	-0.917279	-0.942015	-0.802631	-0.946265
Q9JI92	Syntenin-1 OS=Rattus norvegicus OX=10116 GN=Sdcbp PE=1 SV=1 - [SDCB1_RAT]	5	7	0.222551	0.0132355	0.503069	0.383543	0.422132	0.432517	0.597394	0.606175
A0A0G2K3W2	Coagulation factor V OS=Rattus norvegicus OX=10116 GN=F5 PE=1 SV=1 - [A0A0G2K3W2_RAT]	19	36	0.473715	0.162164	0.352321	0.261978	0.648729	0.929694	0.976736	0.794571
D3ZWH1	Stabilin 1 OS=Rattus norvegicus OX=10116 GN=Stab1 PE=1 SV=2 - [D3ZWH1_RAT]	8	18	0.285783	0.370175	0.444169	0.368496	0.268599	0.407407	0.332986	0.359638
Q4FZT8	SPRY domain-containing protein 4 OS=Rattus norvegicus OX=10116 GN=Spryd4 PE=2 SV=1 - [SPRY4_RAT]	6	10	0.193522	0.246715	0.161384	-0.0352804	-0.219237	-0.221417	-0.211638	-0.234901
Q6IRL3	Reticulon OS=Rattus norvegicus OX=10116 GN=Rtn4 PE=2 SV=1 - [Q6IRL3_RAT]	1	28	0.864573	0.268794	0.93907	0.683495	1.07082	1.31707	1.31829	1.38985
P35745	Acylphosphatase-2 OS=Rattus norvegicus OX=10116 GN=Acyp2 PE=1 SV=2 - [ACYP2_RAT]	2	5	-0.740238	-0.197244	-0.581509	-1.13685	-1.42201	-1.27844	-1.14991	-1.09652
G3V9N9	alpha-1,2-Mannosidase OS=Rattus norvegicus OX=10116 GN=Man1a1 PE=1 SV=1 - [G3V9N9_RAT]	8	12	0.610266	0.181775	0.522404	0.378349	0.692686	0.920561	0.979333	0.987771
D3ZPN3	Myeloid leukemia factor 2 OS=Rattus norvegicus OX=10116 GN=Mlf2 PE=1 SV=1 - [D3ZPN3_RAT]	1	1	0.0436037	-0.115211	0.190978	0.296923	0.346346	0.437113	0.393568	0.375824
Q6P685	Eukaryotic translation initiation factor 2 subunit beta OS=Rattus norvegicus OX=10116 GN=Eif2s2 PE=1 SV=1 - [Q6P685_RAT]	16	51	-0.357158	-0.27533	-0.364663	-0.267348	-0.315795	-0.470955	-0.335414	-0.382576
G3V9H9	Glycoprotein 5, platelet OS=Rattus norvegicus OX=10116 GN=NEWGENE_2724 PE=4 SV=1 - [G3V9H9_RAT]	6	13	0.747802	0.0234861	0.253467	0.208562	1.0159	1.35168	1.49464	1.50311
B5DF03	Peptidylprolyl isomerase (Fragment) OS=Rattus norvegicus OX=10116 GN=Fkbp3 PE=2 SV=1 - [B5DF03_RAT]	10	44	-1.16387	-0.487513	-1.14983	-0.760721	-0.83043	-0.989015	-1.11118	-1.09746
D3ZUL1	Coiled-coil domain-containing 124 OS=Rattus norvegicus OX=10116 GN=Ccdc124 PE=1 SV=1 - [D3ZUL1_RAT]	3	7	-0.889031	-0.396848	-0.51629	-0.471525	-0.486593	-0.769177	-0.845381	-0.863699
Q5M7T6	V-type proton ATPase subunit OS=Rattus norvegicus OX=10116 GN=Atp6v0d1 PE=1 SV=1 - [Q5M7T6_RAT]	8	26	0.862269	0.46201	0.921594	0.525064	0.530457	0.688155	0.611694	0.686958
A0A140TAB8	Tyrosine-protein kinase receptor OS=Rattus norvegicus OX=10116 GN=Igf1r PE=3 SV=1 - [A0A140TAB8_RAT]	3	10	0.303939	0.679595	1.09511	0.645006	0.485217	0.662923	0.921087	0.72358
Q63584	Transmembrane emp24 domain-containing protein 10 OS=Rattus norvegicus OX=10116 GN=Tmed10 PE=1 SV=2 - [TMEDA_RAT]	8	35	0.344683	0.303956	0.413425	0.371295	0.368895	0.354195	0.397253	0.36118
F1LZ34	S-adenosylmethionine synthase OS=Rattus norvegicus OX=10116 GN=Mat1a PE=1 SV=3 - [F1LZ34_RAT]	8	56	-0.477165	-0.994784	-0.737284	-1.16824	-1.02785	-0.90129	-0.931806	-1.06782
D3ZGY2	OTU domain-containing 6B OS=Rattus norvegicus OX=10116 GN=Otud6b PE=1 SV=3 - [D3ZGY2_RAT]	4	4	-0.608259	-0.159644	-0.162819	-1.90045	-1.44072	-1.10798	-1.38815	-1.84985
A2IBE0	Carbonic anhydrase 14 OS=Rattus norvegicus OX=10116 GN=Car14 PE=1 SV=1 - [A2IBE0_RAT]	4	11	0.497402	0.259145	0.372123	0.249229	0.361716	0.595898	0.564523	0.645638
O35849	Lecithin cholesterol acyltransferase OS=Rattus norvegicus OX=10116 GN=Lcat PE=1 SV=1 - [O35849_RAT]	4	9	-0.482895	-1.01106	-0.609088	-0.370196	-0.561265	-0.758147	-0.885158	-0.7481
Q4V8C2	Centromere/kinetochore protein zw10 homolog OS=Rattus norvegicus OX=10116 GN=Zw10 PE=2 SV=3 - [ZW10_RAT]	9	22	0.40212	0.341218	0.636881	0.225407	0.476635	0.724554	0.686286	0.684675
A0A0G2K7Q1	Phospholipid scramblase OS=Rattus norvegicus OX=10116 GN=Plscr1 PE=3 SV=1 - [A0A0G2K7Q1_RAT]	2	5	0.381129	0.284025	0.561698	0.198998	0.625776	0.878655	0.887201	0.883733
F1LT49	Leucine-rich repeat-containing 47 OS=Rattus norvegicus OX=10116 GN=Lrrc47 PE=1 SV=2 - [F1LT49_RAT]	3	8	-0.0105907	-0.0423651	-0.301344	-0.337241	-0.311063	-0.346672	-0.504828	-0.465049
M0RAP6	Family with sequence similarity 208, member A OS=Rattus norvegicus OX=10116 GN=Fam208a PE=1 SV=2 - [M0RAP6_RAT]	9	16	0.129576	0.0715788	0.535272	0.53344	0.663823	0.544324	0.509902	0.57225
P70705	Copper-transporting ATPase 1 OS=Rattus norvegicus OX=10116 GN=Atp7a PE=1 SV=1 - [ATP7A_RAT]	8	16	0.430155	0.502638	0.44064	0.142907	0.332469	0.347213	0.429308	0.425897
F1M589	Promyelocytic leukemia OS=Rattus norvegicus OX=10116 GN=Pml PE=1 SV=3 - [F1M589_RAT]	14	30	-0.119143	-0.134945	0.270214	0.283663	0.501663	0.563189	0.739924	0.756456
Q6AYE2	Endophilin-B1 OS=Rattus norvegicus OX=10116 GN=Sh3glb1 PE=2 SV=1 - [SHLB1_RAT]	6	20	-0.0386698	-0.15207	-0.365657	-0.41518	-0.367899	-0.35492	-0.422112	-0.340177
D4A3E0	Multimerin 1 OS=Rattus norvegicus OX=10116 GN=Mmrn1 PE=4 SV=1 - [D4A3E0_RAT]	24	62	0.444437	0.169598	0.385038	0.206304	0.816965	1.17207	1.21341	1.14357
Q9R0A8	HAUS augmin-like complex subunit 1 OS=Rattus norvegicus OX=10116 GN=Haus1 PE=2 SV=2 - [HAUS1_RAT]	2	3	0.576202	0.0690112	-0.0937345	0.427983	0.626799	0.643441	0.59193	0.505595
G3V681	DNA helicase OS=Rattus norvegicus OX=10116 GN=Mcm4 PE=1 SV=1 - [G3V681_RAT]	5	11	0.381422	0.0994169	0.447399	0.568523	0.483922	0.408084	0.413993	0.41096
D3ZQL7	Similar to 25 kDa brain-specific protein (P25-alpha) (Predicted), isoform CRA_a OS=Rattus norvegicus OX=10116 GN=Tppp PE=1 SV=1 - [D3ZQL7_RAT]	2	4	-0.336254	-0.152856	-0.562966	-0.605849	-0.529344	-0.595712	-0.766288	-0.579842
A0A0G2K4H9	Keratin, type I cytoskeletal 12 OS=Rattus norvegicus OX=10116 GN=Krt12 PE=3 SV=1 - [A0A0G2K4H9_RAT]	3	14	1.10848	-0.420621	-0.67392	0.275067	1.22776	1.20637	1.40901	1.40828
A1KXF7	TID-1 short isoform OS=Rattus norvegicus OX=10116 PE=2 SV=1 - [A1KXF7_RAT]	11	32	-0.120088	0.0392618	-0.182009	-0.253535	-0.366814	-0.328515	-0.326317	-0.341974
D3ZIN7	Mitochondrial ribosomal protein S23 OS=Rattus norvegicus OX=10116 GN=Mrps23 PE=1 SV=1 - [D3ZIN7_RAT]	4	7	0.136265	0.0685772	-0.14316	-0.144299	-0.239289	-0.326461	-0.341352	-0.219081
D4ACC2	KN motif and ankyrin repeat domains 2 OS=Rattus norvegicus OX=10116 GN=Kank2 PE=1 SV=2 - [D4ACC2_RAT]	13	38	-0.271118	0.0456778	0.0807394	0.0976001	0.377813	0.439886	0.425738	0.501338
F7EWC5	Similar to Ly6-C antigen gene (Fragment) OS=Rattus norvegicus OX=10116 GN=RGD1565410 PE=4 SV=2 - [F7EWC5_RAT]	1	2	0.694327	0.188683	0.353875	0.57072	0.97242	1.29266	1.3302	1.03119
A0A0G2K3A4	Mucin 6, oligomeric mucus/gel-forming OS=Rattus norvegicus OX=10116 GN=Muc6 PE=4 SV=1 - [A0A0G2K3A4_RAT]	1	1	0.707122	0.434241	0.580514	0.904072	1.04981	1.00677	1.22688	1.07257
Q793F9	Vacuolar protein sorting-associated protein 4A OS=Rattus norvegicus OX=10116 GN=Vps4a PE=1 SV=1 - [VPS4A_RAT]	4	13	0.222347	0.0583379	0.383733	0.368097	0.245108	0.388877	0.483658	0.449066
P24008	3-oxo-5-alpha-steroid 4-dehydrogenase 1 OS=Rattus norvegicus OX=10116 GN=Srd5a1 PE=1 SV=2 - [S5A1_RAT]	2	3	-1.57984	-0.530127	-0.939479	-1.15224	-1.1819	-1.31479	-1.12322	-1.11538
P19527	Neurofilament light polypeptide OS=Rattus norvegicus OX=10116 GN=Nefl PE=1 SV=3 - [NFL_RAT]	1	136	-1.58269	-1.53726	-1.45623	-1.18466	-1.33793	-1.45362	-1.4562	-1.79949
A0A0G2JSV6	Globin c2 OS=Rattus norvegicus OX=10116 GN=Hba-a2 PE=1 SV=1 - [A0A0G2JSV6_RAT]	1	1651	2.15258	1.81835	1.40529	1.37818	1.10955	0.916132	0.835292	0.834972
Q6AYA2	Vaccinia-related kinase 1 OS=Rattus norvegicus OX=10116 GN=Vrk1 PE=1 SV=1 - [Q6AYA2_RAT]	9	15	-0.178877	0.122295	0.1942	0.405618	0.453494	0.321734	0.386972	0.322255
M0RA19	Endoglin OS=Rattus norvegicus OX=10116 GN=Eng PE=1 SV=2 - [M0RA19_RAT]	9	23	0.540448	0.349993	0.675023	0.487988	0.585446	0.726507	0.705445	0.607953
G3C8Z1	E3 ubiquitin-protein ligase MGRN1 isoform I OS=Rattus norvegicus OX=10116 GN=Mgrn1 PE=2 SV=1 - [G3C8Z1_RAT]	2	4	0.23102	-0.235905	0.217392	0.414533	0.31273	0.279202	0.322158	0.468145
D3ZJF9	Alpha-galactosidase OS=Rattus norvegicus OX=10116 GN=Gla PE=1 SV=2 - [D3ZJF9_RAT]	2	4	0.409057	0.26754	-0.0999277	0.064589	0.179675	0.256161	0.294989	0.347889
P22734	Catechol O-methyltransferase OS=Rattus norvegicus OX=10116 GN=Comt PE=1 SV=2 - [COMT_RAT]	9	41	0.814623	0.658275	0.762821	0.261641	-0.251374	-0.400008	-0.312357	-0.28612
F1LWG4	NADH dehydrogenase (Ubiquinone) 1 alpha subcomplex, assembly factor 1 (Predicted), isoform CRA_a OS=Rattus norvegicus OX=10116 GN=Ndufaf1 PE=1 SV=2 - [F1LWG4_RAT]	9	20	0.626614	0.504586	0.39713	0.204857	0.281232	0.313267	0.294691	0.336789
D3ZAE6	RCG49849 OS=Rattus norvegicus OX=10116 GN=Vasn PE=1 SV=1 - [D3ZAE6_RAT]	3	5	0.0945174	0.176455	0.178232	0.248284	0.555482	0.748576	0.779143	0.790674
Q6TUH4	LRRGT00070 OS=Rattus norvegicus OX=10116 GN=Thoc1 PE=1 SV=1 - [Q6TUH4_RAT]	4	24	0.0820776	0.057255	0.16517	0.0916919	0.401638	0.379872	0.549574	0.571839
Q5XIK0	Uncharacterized protein OS=Rattus norvegicus OX=10116 GN=LOC502684 PE=2 SV=1 - [Q5XIK0_RAT]	1	7	0.3717	0.0284112	0.410838	0.229623	0.421898	0.664678	0.675973	0.776826
Q80WK7	Equilibrative nucleoside transporter 3 OS=Rattus norvegicus OX=10116 GN=Slc29a3 PE=1 SV=2 - [S29A3_RAT]	1	3	-0.501798	-0.524462	-1.2132	-1.18263	-0.849214	-0.765619	-0.700662	-0.485051
Q91ZW1	Transcription factor A, mitochondrial OS=Rattus norvegicus OX=10116 GN=Tfam PE=2 SV=1 - [TFAM_RAT]	11	30	-0.545806	-0.498726	-0.126612	-0.189228	-0.490863	-0.613251	-0.676634	-0.685985
Q68FQ0	T-complex protein 1 subunit epsilon OS=Rattus norvegicus OX=10116 GN=Cct5 PE=1 SV=1 - [TCPE_RAT]	31	158	0.124838	-0.0112066	0.417566	0.304606	0.590963	0.834144	0.815145	0.815282
P61954	Guanine nucleotide-binding protein G(I)/G(S)/G(O) subunit gamma-11 OS=Rattus norvegicus OX=10116 GN=Gng11 PE=3 SV=1 - [GBG11_RAT]	1	4	0.404405	0.564309	0.389756	0.214223	0.422345	0.637118	0.571837	0.539617
P70582	Nuclear pore complex protein Nup54 OS=Rattus norvegicus OX=10116 GN=Nup54 PE=1 SV=1 - [NUP54_RAT]	10	28	-0.0510103	-0.193751	0.561771	0.677979	0.676757	0.775204	0.787769	0.774244
Q6QI57	LRRGT00151 OS=Rattus norvegicus OX=10116 PE=2 SV=1 - [Q6QI57_RAT]	1	2	-0.644306	-1.41289	-2.2459	-1.54475	-1.00786	-1.11023	-1.3114	-1.19248
Q62785	28 kDa heat- and acid-stable phosphoprotein OS=Rattus norvegicus OX=10116 GN=Pdap1 PE=1 SV=1 - [HAP28_RAT]	10	37	-0.811727	-0.683749	-0.864256	-0.653534	-0.879813	-1.08958	-1.25101	-1.12477
Q4KLF8	Actin-related protein 2/3 complex subunit 5 OS=Rattus norvegicus OX=10116 GN=Arpc5 PE=1 SV=3 - [ARPC5_RAT]	8	35	0.463635	-0.0275037	0.437554	0.348577	0.424241	0.631033	0.668266	0.652844
D4A554	Eukaryotic translation initiation factor 4 gamma, 3 OS=Rattus norvegicus OX=10116 GN=Eif4g3 PE=1 SV=2 - [D4A554_RAT]	12	39	-0.0606414	-0.199661	-0.404522	-0.545629	-0.604382	-0.589162	-0.640872	-0.702844
D3ZUX5	MICOS complex subunit OS=Rattus norvegicus OX=10116 GN=Chchd3 PE=1 SV=1 - [D3ZUX5_RAT]	15	62	0.0197184	0.141399	-0.07956	-0.0360675	-0.318452	-0.411262	-0.396021	-0.360813
G3V8C3	Vimentin OS=Rattus norvegicus OX=10116 GN=Vim PE=1 SV=1 - [G3V8C3_RAT]	38	1540	0.00514718	-0.141511	0.335496	0.435164	0.569956	0.689537	0.700763	0.684446
D3ZBX7	V-set and immunoglobulin domain-containing 10 OS=Rattus norvegicus OX=10116 GN=Vsig10 PE=4 SV=3 - [D3ZBX7_RAT]	1	1	0.773638	0.721759	0.750395	0.464176	0.580203	0.784199	0.671106	0.491602
Q5XIE8	Integral membrane protein 2B OS=Rattus norvegicus OX=10116 GN=Itm2b PE=2 SV=1 - [ITM2B_RAT]	3	6	0.417627	0.404385	0.446395	0.371055	0.527051	0.569344	0.560643	0.499475
B5DFA0	Vil1 protein OS=Rattus norvegicus OX=10116 GN=Vil1 PE=1 SV=1 - [B5DFA0_RAT]	15	30	0.874163	0.940868	0.64007	0.773709	0.862259	0.784854	0.807455	0.765227
Q5U2Z3	Nucleosome assembly protein 1-like 4 OS=Rattus norvegicus OX=10116 GN=Nap1l4 PE=1 SV=1 - [NP1L4_RAT]	6	19	-0.442645	-0.176799	-0.646578	-0.37924	-0.414191	-0.492748	-0.466652	-0.538763
M0R776	Mitochondrial ribosomal protein S36 OS=Rattus norvegicus OX=10116 GN=Mrps36 PE=1 SV=1 - [M0R776_RAT]	4	31	-0.624358	-0.251788	-0.532057	-0.453277	-0.798125	-1.00717	-0.879552	-0.903227
M0R7E6	Uncharacterized protein OS=Rattus norvegicus OX=10116 PE=1 SV=2 - [M0R7E6_RAT]	7	18	0.0490034	0.171669	-0.110711	0.309259	0.547889	0.575508	0.61752	0.434526
F6T1W7	DNA polymerase delta 3, accessory subunit OS=Rattus norvegicus OX=10116 GN=Pold3 PE=1 SV=1 - [F6T1W7_RAT]	3	4	0.0860495	0.081248	-0.15321	-0.128193	-0.349309	-0.567031	-0.456534	-0.416547
Q5U2U7	mRNA cap guanine-N7 methyltransferase OS=Rattus norvegicus OX=10116 GN=Rnmt PE=1 SV=1 - [MCES_RAT]	3	5	-0.48513	-0.478419	-0.599892	-0.881399	-0.818077	-0.645362	-0.715281	-0.560742
G3V9P3	Platelet receptor Gi24 OS=Rattus norvegicus OX=10116 GN=Vsir PE=1 SV=2 - [G3V9P3_RAT]	3	6	0.594734	0.434566	0.899567	0.494425	0.767719	0.809803	0.803145	1.07013
B2RYS2	Cytochrome b-c1 complex subunit 7 OS=Rattus norvegicus OX=10116 GN=Uqcrb PE=1 SV=1 - [B2RYS2_RAT]	11	86	0.0858258	-0.0279451	-0.00401023	-0.0438367	-0.147524	-0.177694	-0.232183	-0.162268
O09171	Betaine--homocysteine S-methyltransferase 1 OS=Rattus norvegicus OX=10116 GN=Bhmt PE=1 SV=1 - [BHMT1_RAT]	1	463	-0.444408	-0.855386	-0.90859	-1.58717	-1.46388	-1.34243	-1.54073	-1.49914
Q62714	Neutrophil antibiotic peptide NP-4 OS=Rattus norvegicus OX=10116 GN=Np4 PE=1 SV=1 - [DEF4_RAT]	3	81	0.296026	-0.0828077	0.0763171	0.189966	0.580356	0.857785	0.847399	0.733057
M0R401	Folylpolyglutamate synthase OS=Rattus norvegicus OX=10116 GN=Fpgs PE=1 SV=2 - [M0R401_RAT]	1	1	0.747003	0.379317	0.878314	0.628467	0.866521	0.97703	0.92884	1.11329
Q8R4A1	ERO1-like protein alpha OS=Rattus norvegicus OX=10116 GN=Ero1a PE=1 SV=1 - [ERO1A_RAT]	5	23	2.48332	2.036	2.41605	1.62494	0.964302	0.772263	0.805296	0.994707
B5DFH8	Cleavage stimulation factor, 3' pre-RNA subunit 2, tau OS=Rattus norvegicus OX=10116 GN=Cstf2t PE=2 SV=1 - [B5DFH8_RAT]	4	27	0.2288	0.0304201	0.182934	0.58602	0.62059	0.572098	0.58778	0.531637
A0A0B4J2J0	Fc fragment of IgG receptor Ia OS=Rattus norvegicus OX=10116 GN=Fcgr1a PE=4 SV=1 - [A0A0B4J2J0_RAT]	4	6	0.739119	0.118666	0.74787	0.472888	0.326461	0.465361	0.577027	0.622252
B2RZB3	Eva-1 homolog B OS=Rattus norvegicus OX=10116 GN=Eva1b PE=1 SV=1 - [B2RZB3_RAT]	2	4	0.460085	0.327631	0.677368	0.435352	0.614193	0.580246	0.706298	0.733993
Q66HI5	Ferritin OS=Rattus norvegicus OX=10116 GN=Fth1 PE=1 SV=2 - [Q66HI5_RAT]	11	78	0.286245	0.140722	-0.121436	-0.594794	-0.847732	-0.911427	-0.881608	-0.86796
P85972	Vinculin OS=Rattus norvegicus OX=10116 GN=Vcl PE=1 SV=1 - [VINC_RAT]	58	322	0.362788	0.288138	0.262989	0.148694	0.373733	0.522704	0.531092	0.495379
Q562A4	Ipo11 protein (Fragment) OS=Rattus norvegicus OX=10116 GN=Ipo11 PE=2 SV=1 - [Q562A4_RAT]	1	1	-0.903639	-0.269677	-0.370666	-0.419163	-0.729968	-0.776698	-0.594429	-0.57428
B5DEI0	Pcyox1l protein OS=Rattus norvegicus OX=10116 GN=Pcyox1l PE=2 SV=1 - [B5DEI0_RAT]	3	6	0.713433	0.226555	0.785822	0.33049	0.649975	0.758306	0.78748	0.968236
Q5M9H2	Acyl-Coenzyme A dehydrogenase, very long chain OS=Rattus norvegicus OX=10116 GN=Acadvl PE=1 SV=1 - [Q5M9H2_RAT]	35	162	0.0591129	-0.0536081	-0.206482	-0.635038	-0.610677	-0.408995	-0.411689	-0.450918
A0A0G2JSK5	Integrin beta OS=Rattus norvegicus OX=10116 GN=Itgb1 PE=1 SV=1 - [A0A0G2JSK5_RAT]	22	140	0.546863	0.321143	0.806253	0.505692	0.523407	0.708537	0.665368	0.682511
P84817	Mitochondrial fission 1 protein OS=Rattus norvegicus OX=10116 GN=Fis1 PE=1 SV=1 - [FIS1_RAT]	6	32	0.621498	0.117744	0.61581	0.366372	0.278036	0.37272	0.395539	0.396305
F1M957	von Willebrand factor OS=Rattus norvegicus OX=10116 GN=Vwf PE=1 SV=3 - [F1M957_RAT]	25	52	0.32147	0.356039	0.649249	0.16512	0.714327	1.15579	1.02829	1.06884
F1LPI5	Laminin subunit beta 3 OS=Rattus norvegicus OX=10116 GN=Lamb3 PE=4 SV=2 - [F1LPI5_RAT]	2	4	0.0875975	-0.0300879	0.187389	0.133347	0.236346	0.356765	0.38727	0.427245
D3ZUU6	C-type lectin domain family 3, member B OS=Rattus norvegicus OX=10116 GN=Clec3b PE=1 SV=1 - [D3ZUU6_RAT]	4	8	-1.42789	-1.46651	-1.14068	-1.11241	-1.13685	-1.03081	-0.846588	-1.04544
A0A0G2JU77	Eukaryotic translation initiation factor 3 subunit K OS=Rattus norvegicus OX=10116 GN=Eif3k PE=1 SV=1 - [A0A0G2JU77_RAT]	4	11	0.497667	0.319734	0.346315	0.486803	0.436549	0.549733	0.405847	0.405624
P57756	Ficolin-2 OS=Rattus norvegicus OX=10116 GN=Fcn2 PE=2 SV=1 - [FCN2_RAT]	8	17	0.326036	-0.0971116	0.175069	0.22744	0.702718	0.953564	0.955556	0.877662
H9BFG4	Interleukin-6 receptor subunit beta OS=Rattus norvegicus OX=10116 GN=Il6st PE=2 SV=2 - [H9BFG4_RAT]	11	19	0.834723	0.673223	1.02915	1.09541	0.817808	0.849324	0.787973	0.791983
Q5U2Y1	General transcription factor II-I OS=Rattus norvegicus OX=10116 GN=Gtf2i PE=1 SV=2 - [GTF2I_RAT]	26	54	0.191056	-0.0258216	0.298496	0.243093	0.409771	0.670242	0.698759	0.58647
A0A0G2JUB0	Protein FAM3C OS=Rattus norvegicus OX=10116 GN=Fam3c PE=1 SV=1 - [A0A0G2JUB0_RAT]	7	18	0.22173	0.232504	0.196771	0.169408	0.461238	0.680084	0.62569	0.668728
F1M3Z8	Uncharacterized protein OS=Rattus norvegicus OX=10116 PE=4 SV=1 - [F1M3Z8_RAT]	1	1	0.0971991	0.44981	0.41766	0.261209	0.686231	0.828287	0.82451	0.562321
Q6AYG2	DnaJ (Hsp40) homolog, subfamily C, member 28 OS=Rattus norvegicus OX=10116 GN=Dnajc28 PE=2 SV=1 - [Q6AYG2_RAT]	2	2	0.32589	-0.00359645	0.944151	0.633351	0.528502	0.613446	0.821394	1.08155
P19112	Fructose-1,6-bisphosphatase 1 OS=Rattus norvegicus OX=10116 GN=Fbp1 PE=1 SV=2 - [F16P1_RAT]	20	101	-0.00256069	-0.900324	-0.72326	-1.0599	-1.07218	-0.918577	-0.898655	-0.834552
Q5XIM5	Protein CDV3 homolog OS=Rattus norvegicus OX=10116 GN=Cdv3 PE=1 SV=1 - [CDV3_RAT]	12	56	-0.00966657	-0.0318083	-0.571989	-0.313431	-0.688477	-0.996584	-0.953033	-0.896168
D4A0T0	NADH:ubiquinone oxidoreductase subunit B10 OS=Rattus norvegicus OX=10116 GN=Ndufb10 PE=1 SV=1 - [D4A0T0_RAT]	10	52	-0.16893	-0.103066	-0.0349228	-0.062878	-0.274463	-0.293142	-0.314563	-0.333726
Q5M9F3	Ribosomal RNA processing 1 homolog (S. cerevisiae) OS=Rattus norvegicus OX=10116 GN=Rrp1 PE=1 SV=1 - [Q5M9F3_RAT]	2	6	-0.135202	-0.308924	0.0912808	0.0778734	0.421633	0.597647	0.784704	0.790878
Q794F9	4F2 cell-surface antigen heavy chain OS=Rattus norvegicus OX=10116 GN=Slc3a2 PE=1 SV=1 - [4F2_RAT]	9	33	0.715492	0.422691	0.824388	0.674481	0.500373	0.555701	0.534745	0.602518
D3ZF42	Sentrin-specific protease 7 OS=Rattus norvegicus OX=10116 GN=Senp7 PE=1 SV=1 - [SENP7_RAT]	4	8	-0.0102475	-0.007889	0.358499	0.213129	0.347459	0.44544	0.409396	0.397822
Q0D2L3	Agmatinase, mitochondrial OS=Rattus norvegicus OX=10116 GN=Agmat PE=2 SV=1 - [SPEB_RAT]	8	49	-0.587041	-0.861443	-0.731949	-1.04	-1.25729	-1.26644	-1.22903	-1.14564
A0A1W2Q680	H/ACA ribonucleoprotein complex subunit (Fragment) OS=Rattus norvegicus OX=10116 GN=Gar1 PE=1 SV=1 - [A0A1W2Q680_RAT]	5	8	0.118423	0.0283335	0.586442	0.622441	0.719147	0.650039	0.541661	0.616092
Q9R0C9	Sigma non-opioid intracellular receptor 1 OS=Rattus norvegicus OX=10116 GN=Sigmar1 PE=1 SV=1 - [SGMR1_RAT]	2	5	0.00332354	0.0103441	0.0313792	-0.0590397	-0.521764	-0.613081	-0.486989	-0.460786
Q5XID1	Anamorsin OS=Rattus norvegicus OX=10116 GN=Ciapin1 PE=1 SV=1 - [CPIN1_RAT]	3	4	-0.415445	0.114488	-0.421742	-0.482513	-0.778725	-1.15111	-1.30114	-0.955008
A0S5V8	Chitinase 1 OS=Rattus norvegicus OX=10116 GN=Chit1 PE=2 SV=1 - [A0S5V8_RAT]	5	9	0.770257	-0.198546	0.53575	0.472699	0.772591	1.09159	1.06887	1.12544
Q4G079	Aminoacyl tRNA synthetase complex-interacting multifunctional protein 1 OS=Rattus norvegicus OX=10116 GN=Aimp1 PE=1 SV=1 - [Q4G079_RAT]	12	46	-0.192092	0.00743951	-0.29394	-0.162314	-0.348997	-0.635371	-0.578673	-0.482733
Q66H82	Mitogen-activated protein kinase kinase kinase 13 OS=Rattus norvegicus OX=10116 GN=Map3k13 PE=2 SV=1 - [Q66H82_RAT]	1	1	0.596313	0.268464	0.481341	0.411395	0.567	0.832513	0.738053	0.712905
Q9JMJ4	Pre-mRNA-processing factor 19 OS=Rattus norvegicus OX=10116 GN=Prpf19 PE=1 SV=2 - [PRP19_RAT]	12	40	0.181969	0.15735	0.224847	0.331142	0.370387	0.414846	0.465348	0.512191
M0R919	Prefoldin subunit 3 OS=Rattus norvegicus OX=10116 GN=Vbp1 PE=1 SV=2 - [M0R919_RAT]	2	5	-0.123958	-0.0583402	-0.278474	-0.240616	-0.225593	-0.209333	-0.246696	-0.226342
A0A0G2K0N6	Uncharacterized protein OS=Rattus norvegicus OX=10116 PE=1 SV=1 - [A0A0G2K0N6_RAT]	3	4	-0.0572512	-0.59756	-0.45084	-0.602037	-0.739206	-0.827623	-0.967779	-0.776053
B0BN99	Hmgb3 protein OS=Rattus norvegicus OX=10116 GN=Hmgb3 PE=1 SV=1 - [B0BN99_RAT]	8	22	-0.490065	-0.604628	-0.300047	0.00780519	-0.513207	-0.721971	-0.6976	-0.683948
Q8R1R5	CD99 antigen-like protein 2 OS=Rattus norvegicus OX=10116 GN=Cd99l2 PE=2 SV=1 - [C99L2_RAT]	3	6	0.720905	0.757112	0.990023	0.756353	0.414054	0.470793	0.547067	0.508577
P07896	Peroxisomal bifunctional enzyme OS=Rattus norvegicus OX=10116 GN=Ehhadh PE=1 SV=2 - [ECHP_RAT]	30	82	-2.37432	-1.53028	-1.50032	-2.27963	-1.97647	-1.77281	-1.68375	-1.68705
Q9R175	Interferon-induced transmembrane protein 2 OS=Rattus norvegicus OX=10116 GN=Ifitm2 PE=1 SV=1 - [Q9R175_RAT]	2	5	0.413629	0.47767	0.802356	0.650429	0.615794	0.731509	0.866972	0.665325
B2GUV5	V-type proton ATPase subunit G OS=Rattus norvegicus OX=10116 GN=Atp6v1g1 PE=1 SV=1 - [B2GUV5_RAT]	2	3	-0.83786	-0.798654	-0.572834	-0.2647	-0.727063	-1.32591	-1.27802	-1.08242
P54001	Prolyl 4-hydroxylase subunit alpha-1 OS=Rattus norvegicus OX=10116 GN=P4ha1 PE=2 SV=2 - [P4HA1_RAT]	9	36	0.227187	0.311623	0.414903	0.234245	0.159432	0.244875	0.255934	0.296877
D4AE64	Armadillo repeat-containing 2 OS=Rattus norvegicus OX=10116 GN=Armc2 PE=4 SV=2 - [D4AE64_RAT]	1	2	0.809459	0.301182	0.839899	0.485901	0.876199	1.35376	1.07194	1.25418
B5DEN5	Eukaryotic translation elongation factor 1 beta 2 OS=Rattus norvegicus OX=10116 GN=Eef1b2 PE=1 SV=1 - [B5DEN5_RAT]	14	153	0.217011	0.126351	-0.483216	-0.272675	-0.585568	-0.826919	-0.827281	-0.862429
A0A0G2KA76	Ankyrin repeat domain 7 OS=Rattus norvegicus OX=10116 GN=Ankrd7 PE=4 SV=1 - [A0A0G2KA76_RAT]	1	1	-0.0291883	-0.0175034	0.304212	0.48091	0.470846	0.622598	0.504492	0.446342
A0A0G2JSR7	Matrin-3 OS=Rattus norvegicus OX=10116 GN=Matr3 PE=1 SV=1 - [A0A0G2JSR7_RAT]	18	80	-0.23695	-0.0304834	-0.134886	0.0582961	0.229517	0.258764	0.221412	0.30343
Q6P6S4	Nucleotide exchange factor SIL1 OS=Rattus norvegicus OX=10116 GN=Sil1 PE=2 SV=1 - [SIL1_RAT]	6	10	0.755379	0.612543	0.579506	0.765091	0.530139	0.452194	0.441508	0.530201
Q497B0	Omega-amidase NIT2 OS=Rattus norvegicus OX=10116 GN=Nit2 PE=1 SV=1 - [NIT2_RAT]	15	48	-0.360535	-0.538101	-0.481837	-0.515054	-0.550507	-0.530187	-0.578541	-0.471996
Q62745	CD81 antigen OS=Rattus norvegicus OX=10116 GN=Cd81 PE=1 SV=1 - [CD81_RAT]	2	7	0.105403	-0.201379	0.866196	0.382319	0.68246	0.91371	0.930868	0.844538
E0X583	Stabilin-2/HARE OS=Rattus norvegicus OX=10116 GN=Stab2 PE=2 SV=2 - [E0X583_RAT]	26	69	0.669894	0.959323	1.23734	0.682595	0.590275	0.761084	0.662781	0.683171
P35433	Amidophosphoribosyltransferase OS=Rattus norvegicus OX=10116 GN=Ppat PE=1 SV=1 - [PUR1_RAT]	3	15	-0.444338	-0.415851	-0.497931	-0.196952	-0.555756	-0.743486	-0.70727	-0.761597
P07936	Neuromodulin OS=Rattus norvegicus OX=10116 GN=Gap43 PE=1 SV=1 - [NEUM_RAT]	3	6	-2.62826	-2.40715	-2.28849	-1.61117	-2.25004	-2.4789	-2.77261	-2.78497
P50503	Hsc70-interacting protein OS=Rattus norvegicus OX=10116 GN=St13 PE=1 SV=1 - [F10A1_RAT]	11	45	-0.178521	-0.0123558	-0.573013	-0.303712	-0.452861	-0.599718	-0.58832	-0.528697
Q5XIH4	Lipoyl synthase, mitochondrial OS=Rattus norvegicus OX=10116 GN=Lias PE=2 SV=1 - [LIAS_RAT]	6	14	-0.189783	0.1056	-0.153975	-0.220234	-0.403549	-0.548025	-0.391909	-0.342315
Q08290	Calponin-1 OS=Rattus norvegicus OX=10116 GN=Cnn1 PE=1 SV=1 - [CNN1_RAT]	5	17	-4.40444	-4.30663	-3.42864	-3.09438	-3.22872	-3.70801	-3.88552	-3.88049
Q63068	Phosphorylated adapter RNA export protein OS=Rattus norvegicus OX=10116 GN=Phax PE=1 SV=2 - [PHAX_RAT]	1	1	-1.08414	-0.629845	-0.620381	-0.681438	-0.935511	-0.77444	-0.62319	-0.73951
A0A0H2UHQ8	40S ribosomal protein S17 OS=Rattus norvegicus OX=10116 GN=Rps17 PE=3 SV=1 - [A0A0H2UHQ8_RAT]	4	45	-0.298622	-0.263376	-0.384197	-0.082945	-0.363214	-0.35209	-0.430059	-0.362073
Q63279	Keratin, type I cytoskeletal 19 OS=Rattus norvegicus OX=10116 GN=Krt19 PE=1 SV=2 - [K1C19_RAT]	5	222	1.011	0.235657	0.463708	0.375723	1.04276	1.46825	1.44844	1.36969
B2RYT7	Haloacid dehalogenase-like hydrolase domain-containing 3 OS=Rattus norvegicus OX=10116 GN=Hdhd3 PE=1 SV=1 - [B2RYT7_RAT]	5	9	0.0188637	0.202455	0.173028	-0.158216	-0.429994	-0.521939	-0.604507	-0.53026
Q5I0N5	Agxt protein (Fragment) OS=Rattus norvegicus OX=10116 GN=Agxt PE=2 SV=1 - [Q5I0N5_RAT]	11	58	-0.713821	-0.841839	-0.68137	-1.06979	-0.856102	-0.620002	-0.600858	-0.67165
D4A644	MAP7 domain-containing 1 OS=Rattus norvegicus OX=10116 GN=Map7d1 PE=1 SV=1 - [D4A644_RAT]	8	16	-0.475188	-0.391691	-0.40713	-0.338164	-0.502637	-0.630237	-0.654087	-0.532727
F1M7S4	Mast cell carboxypeptidase A OS=Rattus norvegicus OX=10116 GN=Cpa3 PE=1 SV=3 - [F1M7S4_RAT]	3	4	-1.34495	-1.09569	0.0895969	-0.528453	-1.41813	-1.94872	-1.6884	-1.69189
D3ZRM9	60S ribosomal protein L13 OS=Rattus norvegicus OX=10116 GN=LOC100360491 PE=3 SV=1 - [D3ZRM9_RAT]	9	84	-0.0223245	0.260272	-0.222942	-0.0900789	-0.425903	-0.450471	-0.498323	-0.545841
D4A944	Small nuclear ribonucleoprotein U5 subunit 40 OS=Rattus norvegicus OX=10116 GN=Snrnp40 PE=1 SV=3 - [D4A944_RAT]	10	24	-0.195321	-0.0273661	0.0986275	0.10413	0.228338	0.283916	0.254025	0.139049
P97586	Cell growth regulator with EF hand domain protein 1 OS=Rattus norvegicus OX=10116 GN=Cgref1 PE=1 SV=1 - [CGRE1_RAT]	2	4	-1.85037	-2.34513	-1.87087	-1.26592	-1.7214	-2.01146	-1.67601	-1.74047
A1L108	Actin-related protein 2/3 complex subunit 5-like protein OS=Rattus norvegicus OX=10116 GN=Arpc5l PE=1 SV=2 - [ARP5L_RAT]	6	19	0.32249	-0.00911532	0.517238	0.366744	0.402619	0.723617	0.733476	0.760235
F1M7L9	Uncharacterized protein OS=Rattus norvegicus OX=10116 PE=1 SV=3 - [F1M7L9_RAT]	10	21	0.293071	0.542953	0.686151	0.678156	0.903955	1.03478	1.11904	0.961267
E7CXR8	Receptor protein-tyrosine kinase OS=Rattus norvegicus OX=10116 GN=Egfr PE=2 SV=1 - [E7CXR8_RAT]	14	42	0.408202	0.538748	0.542522	0.513565	0.488463	0.498576	0.591328	0.589475
A0A0G2KB24	Nuclear protein MDM1 OS=Rattus norvegicus OX=10116 GN=Mdm1 PE=1 SV=1 - [A0A0G2KB24_RAT]	3	4	0.171221	-0.0609917	0.26318	0.430647	0.302519	0.40378	0.489342	0.461015
D3ZJA9	Solute carrier family 27 (Fatty acid transporter), member 3 (Predicted) OS=Rattus norvegicus OX=10116 GN=Slc27a3 PE=4 SV=1 - [D3ZJA9_RAT]	1	2	0.261987	0.139918	0.265324	0.25002	0.468889	0.548412	0.608184	0.688867
Q5U1W6	MICOS complex subunit OS=Rattus norvegicus OX=10116 GN=Apool PE=1 SV=1 - [Q5U1W6_RAT]	12	42	-0.0357216	0.088587	-0.0964422	-0.510597	-0.504153	-0.343045	-0.344654	-0.289254
P62916	Transcription initiation factor IIB OS=Rattus norvegicus OX=10116 GN=Gtf2b PE=2 SV=1 - [TF2B_RAT]	6	13	-0.266368	-0.672322	-0.44529	-0.413364	-0.589414	-0.408704	-0.462992	-0.404311
P50411	Protein phosphatase inhibitor 2 OS=Rattus norvegicus OX=10116 GN=Ppp1r2 PE=1 SV=2 - [IPP2_RAT]	4	8	-0.257231	-0.206245	-1.1576	-0.672172	-1.04634	-1.05787	-0.787235	-0.728906
Q8R2H2	Integrin beta OS=Rattus norvegicus OX=10116 GN=Itgb3 PE=2 SV=1 - [Q8R2H2_RAT]	13	55	0.429993	0.163189	0.529939	0.0994489	0.777967	1.23559	1.09137	1.18189
Q3MHS0	Protease, serine, 16 (Thymus) OS=Rattus norvegicus OX=10116 GN=Prss16 PE=2 SV=1 - [Q3MHS0_RAT]	1	1	1.12502	0.959783	1.25728	0.707411	1.0304	1.23491	1.21797	1.50398
P02793	Ferritin light chain 1 OS=Rattus norvegicus OX=10116 GN=Ftl1 PE=1 SV=3 - [FRIL1_RAT]	9	123	0.333298	0.0508814	-0.252831	-0.697312	-0.970997	-1.02941	-1.00133	-0.977897
B5DEG1	Integrin subunit alpha 8 OS=Rattus norvegicus OX=10116 GN=Itga8 PE=1 SV=1 - [B5DEG1_RAT]	4	8	0.260873	0.125179	0.361649	0.167723	0.538766	0.830807	0.706836	0.631595
Q9JK41	High affinity copper uptake protein 1 OS=Rattus norvegicus OX=10116 GN=Slc31a1 PE=2 SV=1 - [COPT1_RAT]	1	2	0.879094	1.46183	1.02016	0.788426	1.16106	1.25754	1.09182	0.811903
A0A0G2JX94	Angiomotin OS=Rattus norvegicus OX=10116 GN=Amot PE=4 SV=1 - [A0A0G2JX94_RAT]	8	19	0.326676	0.285181	0.514793	0.972776	0.845394	0.754342	0.65014	0.793898
Q64244	ADP-ribosyl cyclase/cyclic ADP-ribose hydrolase 1 OS=Rattus norvegicus OX=10116 GN=Cd38 PE=1 SV=1 - [CD38_RAT]	3	8	0.840508	0.581472	0.95115	0.55896	0.451039	0.792524	0.64914	0.790165
M0RA79	Uncharacterized protein OS=Rattus norvegicus OX=10116 PE=1 SV=1 - [M0RA79_RAT]	3	5	-0.577403	-0.684653	-0.831185	-1.10479	-1.35104	-1.06109	-1.05263	-1.22516
D4ABF0	Endoplasmic reticulum protein SC65 OS=Rattus norvegicus OX=10116 GN=P3h4 PE=4 SV=1 - [D4ABF0_RAT]	4	8	0.479554	-0.0787701	0.316326	0.416664	0.722432	0.879374	0.976506	0.858807
D4A4W6	RCG20695, isoform CRA_b OS=Rattus norvegicus OX=10116 GN=Slirp PE=1 SV=1 - [D4A4W6_RAT]	2	3	0.676241	0.544698	0.368141	0.316984	0.308788	0.216378	0.329402	0.387472
A0A096MJY6	1,4-alpha-glucan-branching enzyme (Fragment) OS=Rattus norvegicus OX=10116 GN=Gbe1 PE=1 SV=1 - [A0A096MJY6_RAT]	1	7	-0.119243	-0.112617	-0.628114	-1.01261	-1.08976	-0.886871	-0.705372	-0.837015
G3V7F6	RCG23529, isoform CRA_a OS=Rattus norvegicus OX=10116 GN=RGD1561590 PE=1 SV=1 - [G3V7F6_RAT]	9	39	0.279158	0.120034	0.485098	0.485779	0.403893	0.447905	0.40933	0.488523
Q3B8P1	Ctdsp1 protein (Fragment) OS=Rattus norvegicus OX=10116 GN=Ctdsp1 PE=2 SV=1 - [Q3B8P1_RAT]	2	5	0.412759	0.22055	0.573403	0.336525	0.371779	0.571546	0.686916	0.790277
D3ZCP9	Transcription initiation factor IIE subunit beta OS=Rattus norvegicus OX=10116 GN=Gtf2e2 PE=1 SV=1 - [D3ZCP9_RAT]	3	4	-1.15411	-1.13675	-0.984743	-0.670403	-0.677545	-0.722029	-0.875541	-0.570173
A0A0G2K9N9	Calcium-transporting ATPase OS=Rattus norvegicus OX=10116 GN=Atp2a3 PE=1 SV=1 - [A0A0G2K9N9_RAT]	1	26	0.396196	-0.16978	0.166134	0.137158	1.35808	1.15173	1.23994	0.875119
Q5M883	Chloride intracellular channel protein 2 OS=Rattus norvegicus OX=10116 GN=Clic2 PE=2 SV=1 - [CLIC2_RAT]	2	3	0.0145638	0.0855785	-0.0764794	0.125109	0.422812	0.514871	0.460747	0.319181
D3ZYS7	G3BP stress granule assembly factor 1 OS=Rattus norvegicus OX=10116 GN=G3bp1 PE=1 SV=1 - [D3ZYS7_RAT]	8	33	0.214056	-0.0428531	-0.472722	-0.142694	-0.299343	-0.480283	-0.458824	-0.478534
Q5XIM9	T-complex protein 1 subunit beta OS=Rattus norvegicus OX=10116 GN=Cct2 PE=1 SV=3 - [TCPB_RAT]	27	158	0.268864	0.00496921	0.50456	0.202046	0.668188	0.950314	0.935415	0.946058
B5DFE0	Membrane palmitoylated protein 6 OS=Rattus norvegicus OX=10116 GN=Mpp6 PE=1 SV=1 - [B5DFE0_RAT]	13	29	0.112615	0.544392	0.487451	0.27281	0.250557	0.274979	0.27115	0.177048
A0A0G2JSK9	Betaine--homocysteine S-methyltransferase 1 OS=Rattus norvegicus OX=10116 GN=Bhmt PE=1 SV=1 - [A0A0G2JSK9_RAT]	1	469	-0.600065	-0.87609	-1.03078	-1.48212	-1.50853	-1.51918	-1.54874	-1.34832
P60123	RuvB-like 1 OS=Rattus norvegicus OX=10116 GN=Ruvbl1 PE=1 SV=1 - [RUVB1_RAT]	5	45	0.532209	0.0880335	0.349778	0.446009	0.402506	0.462637	0.400279	0.48207
Q642E6	Tripeptidyl peptidase I OS=Rattus norvegicus OX=10116 GN=Tpp1 PE=1 SV=1 - [Q642E6_RAT]	3	10	0.385658	0.110139	0.489704	0.233021	0.465665	0.71791	0.685856	0.582622
G3V8G5	Golgi apparatus protein 1 OS=Rattus norvegicus OX=10116 GN=Glg1 PE=1 SV=1 - [G3V8G5_RAT]	30	92	0.41935	0.487116	0.566403	0.663699	0.505936	0.483233	0.471281	0.440068
A0A0G2K7K2	Apoptosis-inducing factor 1, mitochondrial OS=Rattus norvegicus OX=10116 GN=Aifm1 PE=1 SV=1 - [A0A0G2K7K2_RAT]	20	92	-0.023824	-0.0558292	-0.0437261	-0.165341	-0.296458	-0.371229	-0.346659	-0.391803
D4ACD4	RNA pseudouridylate synthase domain containing 2 (Predicted) OS=Rattus norvegicus OX=10116 GN=LOC100911166 PE=1 SV=1 - [D4ACD4_RAT]	1	1	0.837714	0.621589	0.57239	0.141423	0.969342	1.41389	1.56198	1.40686
Q6T487	Alpha-actinin-1 OS=Rattus norvegicus OX=10116 GN=Actn1 PE=1 SV=1 - [Q6T487_RAT]	24	319	0.406946	0.174487	0.384646	0.479332	0.425408	0.441054	0.356886	0.407734
P24155	Thimet oligopeptidase OS=Rattus norvegicus OX=10116 GN=Thop1 PE=1 SV=4 - [THOP1_RAT]	17	34	0.81186	0.323705	0.358049	0.147985	0.21669	0.238769	0.241105	0.262176
M0R735	Heterogeneous nuclear ribonucleoprotein Q OS=Rattus norvegicus OX=10116 GN=Syncrip PE=1 SV=2 - [M0R735_RAT]	13	37	-0.208623	-0.165142	-0.593204	-0.239424	-0.264683	-0.524055	-0.664341	-0.544419
F1LSL2	Nuclear pore complex protein Nup107 OS=Rattus norvegicus OX=10116 GN=Nup107 PE=1 SV=2 - [F1LSL2_RAT]	12	31	-0.329194	0.134367	0.54259	0.365492	0.600976	0.5337	0.518444	0.698764
P97829	Leukocyte surface antigen CD47 OS=Rattus norvegicus OX=10116 GN=Cd47 PE=1 SV=1 - [CD47_RAT]	4	18	0.375992	0.538817	0.662779	0.337501	0.56228	0.786274	0.77309	0.670707
P55159	Serum paraoxonase/arylesterase 1 OS=Rattus norvegicus OX=10116 GN=Pon1 PE=1 SV=3 - [PON1_RAT]	4	7	-1.82659	-2.5645	-1.69056	-2.0934	-1.46981	-1.13218	-1.06608	-0.962248
A0A0G2JZR4	Ras-related protein Rab-11B OS=Rattus norvegicus OX=10116 GN=Rab11b PE=1 SV=1 - [A0A0G2JZR4_RAT]	8	22	0.631853	0.393119	0.744016	0.465926	0.420191	0.545008	0.556353	0.543236
Q71KM5	CRAMP (Fragment) OS=Rattus norvegicus OX=10116 PE=2 SV=1 - [Q71KM5_RAT]	4	102	0.549982	-0.296992	0.464404	0.280672	0.862787	1.27543	1.05404	1.21367
F1LMC7	Septin-7 OS=Rattus norvegicus OX=10116 GN=Sept7 PE=1 SV=3 - [F1LMC7_RAT]	12	37	-0.411287	-0.482961	-0.399313	-0.258819	-0.249657	-0.20602	-0.223374	-0.260725
Q9WVK7	Hydroxyacyl-coenzyme A dehydrogenase, mitochondrial OS=Rattus norvegicus OX=10116 GN=Hadh PE=2 SV=1 - [HCDH_RAT]	13	48	-0.352056	-0.428121	-0.527219	-0.517755	-0.41239	-0.32044	-0.332215	-0.296008
A0A096MIS3	Translation initiation factor eIF-2B subunit delta OS=Rattus norvegicus OX=10116 GN=Eif2b4 PE=1 SV=2 - [A0A096MIS3_RAT]	4	16	-0.864553	-0.355595	-0.841089	-1.13068	-0.760854	-0.852122	-1.09099	-1.06227
D3ZKW6	Uroplakin 3B OS=Rattus norvegicus OX=10116 GN=Upk3b PE=2 SV=1 - [D3ZKW6_RAT]	2	3	-0.249584	0.0450338	0.437061	0.237557	0.619414	0.921176	0.904284	0.961683
E9PSJ4	Sperm-associated antigen 9 OS=Rattus norvegicus OX=10116 GN=Spag9 PE=1 SV=2 - [E9PSJ4_RAT]	10	26	-0.0707432	-0.296783	-0.531399	-0.47944	-0.491936	-0.544912	-0.482304	-0.36229
A0A0G2K047	Acyl-CoA synthetase short-chain family member 3 OS=Rattus norvegicus OX=10116 GN=Acss3 PE=1 SV=1 - [A0A0G2K047_RAT]	7	16	-0.412815	-0.193426	-0.339393	-0.38006	-0.463941	-0.463106	-0.346805	-0.3642
D3ZRX9	Calponin (Fragment) OS=Rattus norvegicus OX=10116 GN=Cnn2 PE=1 SV=3 - [D3ZRX9_RAT]	4	19	0.345388	0.091443	0.150733	0.365135	0.544332	0.583229	0.567775	0.682534
G3V7V6	All-trans-13,14-dihydroretinol saturase, isoform CRA_b OS=Rattus norvegicus OX=10116 GN=Retsat PE=1 SV=1 - [G3V7V6_RAT]	3	6	-0.968664	-0.558042	-0.518511	-0.698635	-1.00701	-1.07724	-1.19739	-1.1522
P60711	Actin, cytoplasmic 1 OS=Rattus norvegicus OX=10116 GN=Actb PE=1 SV=1 - [ACTB_RAT]	8	2285	0.373958	0.196857	0.701291	0.4153	0.555195	0.713083	0.728886	0.764612
O88321	Antisecretory factor OS=Rattus norvegicus OX=10116 GN=Psmd4 PE=1 SV=1 - [O88321_RAT]	8	24	-0.269594	-0.299343	-0.897043	-0.461146	-0.441974	-0.748827	-0.741199	-0.75213
Q498D5	Regulator of microtubule dynamics protein 2 OS=Rattus norvegicus OX=10116 GN=Rmdn2 PE=1 SV=1 - [RMD2_RAT]	3	8	-0.670382	-0.459245	-0.543732	-0.804468	-0.816326	-0.561646	-0.706805	-0.583506
Q6PCU4	Emd protein OS=Rattus norvegicus OX=10116 GN=Emd PE=1 SV=1 - [Q6PCU4_RAT]	9	35	0.691092	0.80214	0.745471	0.73695	0.954596	0.989247	0.981826	0.835121
D4A545	Mast cell-expressed membrane protein 1 OS=Rattus norvegicus OX=10116 GN=Mcemp1 PE=4 SV=1 - [D4A545_RAT]	4	13	0.303212	-0.269066	0.596296	0.220742	0.591674	0.955799	1.02843	1.01909
A0A0G2JZJ9	Uncharacterized protein OS=Rattus norvegicus OX=10116 PE=4 SV=1 - [A0A0G2JZJ9_RAT]	5	8	-0.566594	-0.0286367	-0.401903	-0.28481	-0.320148	-0.484044	-0.510142	-0.473089
F1LM66	Elongation factor Tu GTP-binding domain-containing 2 OS=Rattus norvegicus OX=10116 GN=Eftud2 PE=1 SV=2 - [F1LM66_RAT]	28	86	-0.223637	-0.222502	-0.0419274	0.225767	0.444305	0.478179	0.5138	0.432973
D3ZIT3	Ninein-like OS=Rattus norvegicus OX=10116 GN=LOC100911256 PE=1 SV=3 - [D3ZIT3_RAT]	2	6	0.62566	-0.293631	-0.208294	0.531947	0.769784	0.47787	0.800023	0.758858
D3ZMP6	NOP10 ribonucleoprotein OS=Rattus norvegicus OX=10116 GN=Nop10 PE=1 SV=1 - [D3ZMP6_RAT]	2	4	0.187589	0.282575	0.430163	0.496977	0.469844	0.519335	0.405585	0.344178
A0A0U1RRQ1	NADH:ubiquinone oxidoreductase subunit A1 OS=Rattus norvegicus OX=10116 GN=Ndufa1 PE=1 SV=1 - [A0A0U1RRQ1_RAT]	1	2	-0.422459	-0.015543	-0.566028	-0.318445	-0.323244	-0.426029	-0.355581	-0.389448
A0A0G2KAR3	Phosphatidylinositol glycan anchor biosynthesis class U protein OS=Rattus norvegicus OX=10116 GN=Pigu PE=4 SV=1 - [A0A0G2KAR3_RAT]	1	2	0.611598	0.178004	0.166693	0.173215	0.25357	0.378754	0.477749	0.367551
Q62725	Nuclear transcription factor Y subunit gamma OS=Rattus norvegicus OX=10116 GN=Nfyc PE=2 SV=1 - [NFYC_RAT]	4	9	0.495861	0.288702	0.776749	0.586002	0.375416	0.473418	0.577403	0.521931
O35410	Transcription factor USF-1 OS=Rattus norvegicus OX=10116 GN=Usf1 PE=1 SV=1 - [O35410_RAT]	2	4	-0.172302	0.319106	0.631177	0.511442	0.530484	0.617365	0.417764	0.524634
Q27W02	Protein mago nashi homolog OS=Rattus norvegicus OX=10116 GN=Magoh PE=2 SV=1 - [MGN_RAT]	9	18	0.216229	0.0605882	0.228031	0.372899	0.26437	0.369678	0.377093	0.450215
M0RA86	Coiled-coil domain-containing 9 OS=Rattus norvegicus OX=10116 GN=Ccdc9 PE=1 SV=2 - [M0RA86_RAT]	3	5	-0.0200545	0.0412929	-0.193312	-0.0396898	-0.285884	-0.45697	-0.451519	-0.41398
Q08851	Syntaxin-5 OS=Rattus norvegicus OX=10116 GN=Stx5 PE=1 SV=2 - [STX5_RAT]	6	14	0.165105	-0.0628754	0.22306	0.101968	0.386857	0.431664	0.48101	0.615694
Q63635	Syntaxin-6 OS=Rattus norvegicus OX=10116 GN=Stx6 PE=1 SV=1 - [STX6_RAT]	6	9	0.146796	0.106057	0.248095	0.104106	0.343972	0.471348	0.391225	0.338985
D3ZIP8	Uncharacterized protein OS=Rattus norvegicus OX=10116 PE=4 SV=2 - [D3ZIP8_RAT]	1	1	-0.0363526	-0.241743	-0.0652416	-0.0223022	0.468387	0.699323	0.811822	0.79577
P47967	Galectin-5 OS=Rattus norvegicus OX=10116 GN=Lgals5 PE=1 SV=2 - [LEG5_RAT]	1	9	0.461726	0.14295	0.147293	0.0213138	0.743801	1.0136	1.01929	1.09245
D3ZM73	Olfactory receptor OS=Rattus norvegicus OX=10116 GN=Olr1126 PE=3 SV=1 - [D3ZM73_RAT]	1	1	0.579576	0.101931	0.535079	0.572018	0.376736	0.550923	0.691158	0.822606
Q5BK85	Transmembrane emp24 domain-containing protein 1 OS=Rattus norvegicus OX=10116 GN=Tmed1 PE=2 SV=1 - [TMED1_RAT]	1	2	0.539082	0.416206	0.422354	0.380154	0.735929	0.916165	0.934736	0.822804
A0A0G2K3H5	SIN3 transcription regulator family member A OS=Rattus norvegicus OX=10116 GN=Sin3a PE=1 SV=1 - [A0A0G2K3H5_RAT]	7	12	0.145444	0.284569	0.0681915	0.222731	0.466856	0.481713	0.317543	0.283069
Q6AY04	m-AAA protease-interacting protein 1, mitochondrial OS=Rattus norvegicus OX=10116 GN=Maip1 PE=2 SV=1 - [MAIP1_RAT]	4	10	0.116374	0.11621	-0.0475716	-0.280958	-0.276943	-0.226746	-0.244718	-0.21398
P62275	40S ribosomal protein S29 OS=Rattus norvegicus OX=10116 GN=Rps29 PE=1 SV=2 - [RS29_RAT]	1	2	-0.244492	-0.23731	-0.703511	-0.310477	-0.530886	-0.765951	-0.754231	-0.733723
Q5U2T9	Peptidylprolyl isomerase OS=Rattus norvegicus OX=10116 GN=Fkbp5 PE=1 SV=1 - [Q5U2T9_RAT]	8	12	-0.0518106	-0.157979	-0.304093	-0.175878	-0.328401	-0.363124	-0.350989	-0.362597
P05183	Cytochrome P450 3A2 OS=Rattus norvegicus OX=10116 GN=Cyp3a2 PE=1 SV=2 - [CP3A2_RAT]	3	18	-2.85716	-2.45471	-2.20876	-2.05369	-2.42891	-2.1991	-1.95331	-2.33983
M0R5M7	Transcription factor BTF3 OS=Rattus norvegicus OX=10116 GN=rCG_63270 PE=3 SV=1 - [M0R5M7_RAT]	6	23	-0.258962	-0.117472	-0.586955	-0.301725	-0.528754	-0.906693	-0.973121	-1.01799
Q4V7F2	Cysteine-rich with EGF-like domain protein 1 OS=Rattus norvegicus OX=10116 GN=Creld1 PE=2 SV=1 - [CREL1_RAT]	4	10	0.490118	0.412525	0.563149	0.458913	0.39819	0.492524	0.428376	0.529966
Q3KRE3	Guanine nucleotide-binding protein subunit gamma OS=Rattus norvegicus OX=10116 GN=Gng10 PE=1 SV=1 - [Q3KRE3_RAT]	1	3	0.3725	0.16141	0.33749	0.667912	0.619468	0.54568	0.602942	0.520232
Q3MHS9	Chaperonin containing Tcp1, subunit 6A (Zeta 1) OS=Rattus norvegicus OX=10116 GN=Cct6a PE=1 SV=1 - [Q3MHS9_RAT]	24	170	0.158601	0.102857	0.491294	0.236573	0.664241	0.926961	0.900878	0.95248
Q31267	MHC class I RT1.E OS=Rattus norvegicus OX=10116 GN=rt1-E PE=2 SV=1 - [Q31267_RAT]	2	10	-0.273544	-0.168965	0.523584	0.239859	-1.16593	-1.55904	-1.3628	-1.236
D3ZKR9	Zinc finger CCHC-type containing 6 OS=Rattus norvegicus OX=10116 GN=Tut7 PE=1 SV=3 - [D3ZKR9_RAT]	1	1	-0.509397	-0.457999	-0.489842	-0.574283	-0.561031	-0.508553	-0.531787	-0.884008
A0A0G2JZA7	Transmembrane protein 2 OS=Rattus norvegicus OX=10116 GN=Cemip2 PE=1 SV=1 - [A0A0G2JZA7_RAT]	14	24	0.387644	0.351436	0.745995	0.573579	0.388446	0.282877	0.323674	0.371492
F1LMK0	A kinase (PRKA) anchor protein 1, isoform CRA_a OS=Rattus norvegicus OX=10116 GN=Akap1 PE=1 SV=2 - [F1LMK0_RAT]	8	26	-0.135452	0.216382	-0.322151	-0.212734	-0.600849	-0.699974	-0.651058	-0.692908
Q499V0	COMM domain containing 7, isoform CRA_d OS=Rattus norvegicus OX=10116 GN=Commd7 PE=1 SV=1 - [Q499V0_RAT]	1	3	0.641382	0.157903	0.28565	0.327611	0.166682	0.239826	0.334711	0.309888
P62961	Nuclease-sensitive element-binding protein 1 OS=Rattus norvegicus OX=10116 GN=Ybx1 PE=2 SV=3 - [YBOX1_RAT]	6	97	-0.812186	-0.179783	-0.825267	-0.476261	-0.735121	-0.870188	-0.986458	-0.983135
P20788	Cytochrome b-c1 complex subunit Rieske, mitochondrial OS=Rattus norvegicus OX=10116 GN=Uqcrfs1 PE=1 SV=2 - [UCRI_RAT]	10	77	-0.113104	-0.0219861	-0.0936271	-0.272973	-0.48598	-0.434933	-0.439557	-0.316502
G3V659	Nuclear envelope pore membrane protein POM 121 OS=Rattus norvegicus OX=10116 GN=Pom121 PE=1 SV=1 - [G3V659_RAT]	7	15	0.294777	0.0854525	0.686164	0.576585	0.377962	0.354076	0.322083	0.347156
F1LQI4	Aggrecan core protein OS=Rattus norvegicus OX=10116 GN=Acan PE=1 SV=2 - [F1LQI4_RAT]	7	12	-0.0247383	-0.30896	0.0152831	-0.18063	-0.669344	-0.787966	-0.668271	-0.53726
D3ZTH8	Similar to 60S ribosomal protein L23a OS=Rattus norvegicus OX=10116 GN=LOC689899 PE=3 SV=1 - [D3ZTH8_RAT]	11	56	-0.204621	0.0208172	-0.229432	-0.0407478	-0.33181	-0.531174	-0.574193	-0.558412
A0A0G2KBA2	Glypican-3 OS=Rattus norvegicus OX=10116 GN=Gpc3 PE=3 SV=1 - [A0A0G2KBA2_RAT]	4	9	0.697865	0.174288	0.557263	1.0301	0.631355	0.431657	0.487017	0.420162
Q5RK09	Eukaryotic translation initiation factor 3 subunit G OS=Rattus norvegicus OX=10116 GN=Eif3g PE=1 SV=1 - [EIF3G_RAT]	13	52	-0.43135	-0.395417	-0.593736	-0.550895	-0.529536	-0.52699	-0.525456	-0.488809
Q5M881	Zinc finger protein 105 OS=Rattus norvegicus OX=10116 GN=Zfp105 PE=2 SV=1 - [Q5M881_RAT]	1	2	-0.582119	-0.525452	-0.738306	-0.595373	-0.821512	-1.0136	-1.00164	-0.832139
Q5XI80	SP100 nuclear antigen OS=Rattus norvegicus OX=10116 GN=Sp100 PE=2 SV=1 - [Q5XI80_RAT]	3	5	0.0929917	-0.0769941	0.752363	0.931203	0.881627	0.738589	0.78947	0.559752
D3ZD09	Cytochrome c oxidase subunit OS=Rattus norvegicus OX=10116 GN=Cox6b1 PE=1 SV=1 - [D3ZD09_RAT]	6	126	-0.176062	0.166044	-0.0595493	-0.0340089	-0.430036	-0.644067	-0.66536	-0.649719
F1LW61	Hypothetical protein LOC691189 OS=Rattus norvegicus OX=10116 GN=LOC691189 PE=4 SV=3 - [F1LW61_RAT]	2	4	0.719965	0.643346	0.841702	0.512733	0.72642	1.0344	1.03229	1.01789
D3ZP49	Coiled-coil domain-containing protein 72-like OS=Rattus norvegicus OX=10116 GN=LOC100910678 PE=4 SV=2 - [D3ZP49_RAT]	2	8	-0.651238	-0.490801	-0.6983	-0.224026	-0.638218	-0.972242	-1.10462	-0.958085
D3KR63	cAMPS OS=Rattus norvegicus OX=10116 GN=Rapgef4 PE=2 SV=1 - [D3KR63_RAT]	1	4	1.13129	0.744028	1.26234	0.912161	0.705673	0.911036	0.976704	0.934876
Q5M872	Dipeptidase 2 OS=Rattus norvegicus OX=10116 GN=Dpep2 PE=2 SV=1 - [DPEP2_RAT]	2	2	0.323203	-1.52616	-2.02512	-0.470052	0.436581	0.662624	0.48466	0.46006
Q00566	Methyl-CpG-binding protein 2 OS=Rattus norvegicus OX=10116 GN=Mecp2 PE=1 SV=1 - [MECP2_RAT]	16	37	-0.555128	-0.45742	0.0424859	-0.136187	-0.315811	-0.346566	-0.417358	-0.385491
D3ZQI0	Polymerase (RNA) II (DNA directed) polypeptide J (Predicted) OS=Rattus norvegicus OX=10116 GN=Polr2j PE=1 SV=1 - [D3ZQI0_RAT]	1	5	0.379739	0.243201	0.396642	0.644379	0.523899	0.372762	0.416008	0.386679
D3ZFC6	Inter-alpha-trypsin inhibitor heavy chain family, member 4 OS=Rattus norvegicus OX=10116 GN=Itih4 PE=1 SV=3 - [D3ZFC6_RAT]	14	27	-0.414608	-0.689739	-0.521803	-0.333993	-0.441393	-0.361331	-0.318866	-0.378688
Q4QQW3	Hydroxyacid-oxoacid transhydrogenase, mitochondrial OS=Rattus norvegicus OX=10116 GN=Adhfe1 PE=1 SV=1 - [HOT_RAT]	10	20	0.136685	-0.261222	0.137569	-0.665637	-0.446605	-0.339687	-0.485932	-0.437749
E9PTF3	NOC2-like nucleolar-associated transcriptional repressor OS=Rattus norvegicus OX=10116 GN=Noc2l PE=1 SV=1 - [E9PTF3_RAT]	6	12	-0.340492	-0.031369	0.0368652	0.0790942	0.323364	0.380202	0.449308	0.352825
B2GV37	Zinc finger protein 593 OS=Rattus norvegicus OX=10116 GN=Zfp593 PE=1 SV=1 - [B2GV37_RAT]	1	2	-0.928374	-0.964856	-1.12213	-0.6379	-0.605656	-0.749941	-0.958853	-0.937615
Q5WN11	Pre-eosinophil-associated ribonuclease-2 OS=Rattus norvegicus OX=10116 GN=Rnase2 PE=2 SV=1 - [Q5WN11_RAT]	1	2	1.01638	-0.679059	0.674497	0.938799	1.41367	1.83448	1.92315	1.65776
P69736	Endothelial differentiation-related factor 1 OS=Rattus norvegicus OX=10116 GN=Edf1 PE=1 SV=1 - [EDF1_RAT]	4	23	-0.72183	-0.60568	-1.09606	-0.353611	-0.69708	-0.922717	-0.895588	-0.897875
A0A140TAD7	JmjC domain-containing protein 8 OS=Rattus norvegicus OX=10116 GN=Jmjd8 PE=1 SV=1 - [A0A140TAD7_RAT]	3	5	0.833684	0.587611	0.7552	0.626888	0.509678	0.520441	0.745208	0.531707
Q5RJR2	Twinfilin-1 OS=Rattus norvegicus OX=10116 GN=Twf1 PE=1 SV=1 - [TWF1_RAT]	4	10	-0.451198	-0.396084	-0.322186	-0.283311	-0.477959	-0.396315	-0.360899	-0.515039
P26376	Interferon-induced transmembrane protein 3 OS=Rattus norvegicus OX=10116 GN=ifitm3 PE=2 SV=1 - [IFM3_RAT]	3	13	-0.126084	-0.0587782	0.115207	0.100454	0.290323	0.555002	0.376038	0.53561
Q08849	Syntaxin-3 OS=Rattus norvegicus OX=10116 GN=Stx3 PE=1 SV=1 - [STX3_RAT]	1	2	0.355066	0.0915645	0.550051	0.404791	0.345377	0.425208	0.348585	0.350104
D3ZMM2	WD repeat domain 90 OS=Rattus norvegicus OX=10116 GN=Wdr90 PE=1 SV=2 - [D3ZMM2_RAT]	1	2	0.193765	-0.232708	0.1053	0.276615	0.529551	0.561381	0.509118	0.412459
A0A0G2K4U8	Syntaxin-12 OS=Rattus norvegicus OX=10116 GN=Stx12 PE=1 SV=1 - [A0A0G2K4U8_RAT]	7	28	0.204312	0.154476	0.410219	0.409659	0.359592	0.451894	0.475741	0.414058
A0A0G2K6V6	Kinesin family member 16B OS=Rattus norvegicus OX=10116 GN=Kif16b PE=3 SV=1 - [A0A0G2K6V6_RAT]	2	3	1.39391	1.11927	0.994015	0.590923	0.575332	0.663683	0.667498	0.841062
A9UMV2	Mitochondrial ribosomal protein S24 OS=Rattus norvegicus OX=10116 GN=Mrps24 PE=1 SV=1 - [A9UMV2_RAT]	1	3	-0.953858	-0.250661	-1.48859	-1.24331	-0.769079	-0.987255	-0.798619	-0.748069
P50339	Chymase OS=Rattus norvegicus OX=10116 GN=Cma1 PE=2 SV=1 - [CMA1_RAT]	2	4	-0.417672	-0.374245	-0.138274	-0.149484	-0.627785	-0.47163	-0.822115	-0.659127
O88902	Tyrosine-protein phosphatase non-receptor type 23 (Fragment) OS=Rattus norvegicus OX=10116 GN=Ptpn23 PE=1 SV=2 - [PTN23_RAT]	8	12	0.788697	0.126104	0.35939	0.409734	0.337338	0.472295	0.536196	0.719683
A0A0G2K2L1	Podocalyxin OS=Rattus norvegicus OX=10116 GN=Podxl PE=1 SV=1 - [A0A0G2K2L1_RAT]	3	9	0.708439	0.467724	0.662006	0.379169	0.342796	0.562768	0.577933	0.678799
D3ZWZ6	Insulin-like growth factor 2 mRNA-binding protein 2 OS=Rattus norvegicus OX=10116 GN=Igf2bp2 PE=1 SV=3 - [D3ZWZ6_RAT]	6	21	0.603553	0.540555	0.301519	0.325433	0.220762	0.174703	0.19698	0.258558
P04961	Proliferating cell nuclear antigen OS=Rattus norvegicus OX=10116 GN=Pcna PE=1 SV=1 - [PCNA_RAT]	6	22	0.476728	-0.0575563	-0.0732787	0.447689	0.511193	0.373094	0.40941	0.386876
F7EKI5	Protocadherin 18 OS=Rattus norvegicus OX=10116 GN=Pcdh18 PE=4 SV=1 - [F7EKI5_RAT]	2	2	0.568694	0.705066	0.588732	0.236507	0.503162	0.629272	0.432466	0.656601
P23347	Anion exchange protein 2 OS=Rattus norvegicus OX=10116 GN=Slc4a2 PE=1 SV=1 - [B3A2_RAT]	4	4	0.871439	0.466123	0.42144	-0.00731049	0.612958	0.74942	0.681408	0.631059
D4A0H5	Cleavage and polyadenylation specific factor 1, 160kDa (Predicted), isoform CRA_a OS=Rattus norvegicus OX=10116 GN=Cpsf1 PE=1 SV=1 - [D4A0H5_RAT]	17	32	-0.232617	-0.216142	-0.185007	0.0726895	0.261023	0.286811	0.341737	0.309564
B1H235	Banp protein OS=Rattus norvegicus OX=10116 GN=Banp PE=2 SV=1 - [B1H235_RAT]	3	4	0.0401578	-0.0466533	0.495436	0.860922	0.664655	0.455548	0.429103	0.584673
M0RC57	Small ArfGAP 1 OS=Rattus norvegicus OX=10116 GN=Smap1 PE=1 SV=1 - [M0RC57_RAT]	3	7	-0.598838	-0.540104	-1.02585	-0.314425	-0.265992	-0.499421	-0.425882	-0.555268
A0A0G2JXB1	Galectin OS=Rattus norvegicus OX=10116 GN=Lgals3 PE=1 SV=1 - [A0A0G2JXB1_RAT]	9	35	0.837113	0.207319	0.759138	0.439559	0.27992	0.403023	0.423437	0.440213
A9UMV7	RCG29512 OS=Rattus norvegicus OX=10116 GN=Uqcr11 PE=1 SV=1 - [A9UMV7_RAT]	1	2	0.0947369	-0.12807	0.114007	0.0966178	-0.209368	-0.372475	-0.367491	-0.263689
D4AD37	Inositol monophosphatase 3 OS=Rattus norvegicus OX=10116 GN=Impad1 PE=3 SV=1 - [IMPA3_RAT]	5	10	0.1231	0.229837	0.249706	0.024857	0.317334	0.38951	0.466423	0.349159
P63074	Eukaryotic translation initiation factor 4E OS=Rattus norvegicus OX=10116 GN=Eif4e PE=1 SV=1 - [IF4E_RAT]	4	9	-0.23035	-0.155694	-0.271963	-0.226014	-0.209999	-0.248802	-0.241968	-0.218469
B2RYC9	Glucosylceramidase OS=Rattus norvegicus OX=10116 GN=Gba PE=1 SV=1 - [B2RYC9_RAT]	6	10	0.269762	-0.104141	0.633415	0.334795	0.28268	0.415024	0.385127	0.40587
A0A0G2K3V7	DNA topoisomerase 1 OS=Rattus norvegicus OX=10116 GN=Top1 PE=1 SV=1 - [A0A0G2K3V7_RAT]	28	91	-0.453483	-0.41121	-0.0400899	0.184381	0.257899	0.177103	0.212827	0.121737
A0A0G2JWS2	Nebulette OS=Rattus norvegicus OX=10116 GN=Nebl PE=1 SV=1 - [A0A0G2JWS2_RAT]	1	3	1.50517	1.11355	1.01656	0.831258	0.769376	0.745973	0.8315	0.636379
A0A0G2JX74	Serine/threonine-protein kinase mTOR OS=Rattus norvegicus OX=10116 GN=Mtor PE=1 SV=1 - [A0A0G2JX74_RAT]	5	5	-0.0657662	-0.0698987	0.0107629	0.00377681	0.288709	0.26331	0.170119	0.306508
A0A0G2JSL0	Proteasome subunit beta type OS=Rattus norvegicus OX=10116 GN=LOC100360846 PE=3 SV=1 - [A0A0G2JSL0_RAT]	2	10	0.548524	-0.0461943	0.0481899	0.0306095	-0.17521	-0.30513	-0.322789	-0.303624
D3ZMT4	Histidine decarboxylase OS=Rattus norvegicus OX=10116 GN=Hdc PE=4 SV=3 - [D3ZMT4_RAT]	8	12	2.54668	3.01912	2.07831	1.47965	1.0454	1.30968	1.24555	1.14029
Q6AY96	General transcription factor IIF subunit 1 OS=Rattus norvegicus OX=10116 GN=Gtf2f1 PE=1 SV=1 - [T2FA_RAT]	6	15	-0.666822	-0.637085	-1.02474	-0.319314	-0.76348	-0.607485	-0.531327	-0.688684
Q63661	Mucin-4 OS=Rattus norvegicus OX=10116 GN=Muc4 PE=1 SV=2 - [MUC4_RAT]	1	1		-1.30284	-2.31752	-1.30957	-2.18419	-2.25726	-1.66192	-2.04337
A0A1B0GWT7	Late endosomal/lysosomal adaptor, MAPK and MTOR activator 2 OS=Rattus norvegicus OX=10116 GN=Lamtor2 PE=1 SV=1 - [A0A1B0GWT7_RAT]	2	6	0.423118	0.311423	0.955922	0.665546	0.434732	0.335779	0.331242	0.289976
Q642B0	Glypican 4 OS=Rattus norvegicus OX=10116 GN=Gpc4 PE=1 SV=1 - [Q642B0_RAT]	9	38	0.600662	0.462119	1.08365	0.588885	0.799792	1.04861	1.09647	1.14986
B0BNN1	Gltpd2 protein OS=Rattus norvegicus OX=10116 GN=Gltpd2 PE=2 SV=1 - [B0BNN1_RAT]	2	3	0.648269	1.13772	0.823175	0.766062	1.05819	1.33369	1.13658	1.2993
M0R907	RCG60635, isoform CRA_b OS=Rattus norvegicus OX=10116 GN=Snrpd3 PE=1 SV=1 - [M0R907_RAT]	3	16	-0.658524	-0.358406	-0.306198	0.153958	0.301722	0.262059	0.301274	0.143962
Q3B8R7	Mitochondrial ribosomal protein L47 OS=Rattus norvegicus OX=10116 GN=Mrpl47 PE=1 SV=1 - [Q3B8R7_RAT]	4	9	-0.273764	0.0226876	-0.327931	-0.465595	-0.491915	-0.56341	-0.526361	-0.433885
Q6NYB7	Ras-related protein Rab-1A OS=Rattus norvegicus OX=10116 GN=Rab1A PE=1 SV=3 - [RAB1A_RAT]	7	73	0.381143	0.536762	0.50922	0.267776	0.18387	0.318206	0.332026	0.194855
Q0VGK3	Glycerate kinase OS=Rattus norvegicus OX=10116 GN=Glyctk PE=1 SV=1 - [GLCTK_RAT]	7	17	0.134402	-0.108364	-0.181577	-0.223192	-0.272185	-0.302886	-0.45409	-0.266027
P20611	Lysosomal acid phosphatase OS=Rattus norvegicus OX=10116 GN=Acp2 PE=1 SV=1 - [PPAL_RAT]	4	8	0.392302	-0.165443	0.161692	0.329189	0.480118	0.620186	0.558668	0.309479
D3ZH59	Adhesion G protein-coupled receptor L3 OS=Rattus norvegicus OX=10116 GN=Adgrl3 PE=1 SV=3 - [D3ZH59_RAT]	3	3	0.636474	0.707566	0.97784	0.9682	0.77217	0.639444	0.352137	0.436294
B2RYA6	Papillary renal cell carcinoma (Translocation-associated) (Predicted) OS=Rattus norvegicus OX=10116 GN=Prcc PE=1 SV=1 - [B2RYA6_RAT]	8	13	-0.582372	-0.42813	-0.37982	-0.00114663	-0.252549	-0.343095	-0.350116	-0.393168
Q920A6	Retinoid-inducible serine carboxypeptidase OS=Rattus norvegicus OX=10116 GN=Scpep1 PE=2 SV=1 - [RISC_RAT]	12	40	0.252193	-0.169285	0.0492532	0.126134	0.366577	0.463876	0.502874	0.54527
P20817	Cytochrome P450 4A14 OS=Rattus norvegicus OX=10116 GN=Cyp4a14 PE=1 SV=2 - [CP4AE_RAT]	9	27	-1.5115	-0.00726215	-0.565561	-1.23651	-1.1755	-1.18314	-1.25966	-1.11698
A0A0G2K681	CAP-Gly domain-containing linker protein 1 OS=Rattus norvegicus OX=10116 GN=Clip1 PE=1 SV=1 - [A0A0G2K681_RAT]	3	90	0.152541	-0.241304	-0.717376	-0.639355	-0.83413	-0.91294	-0.655497	-0.529405
Q569C9	Golgi phosphoprotein 3 OS=Rattus norvegicus OX=10116 GN=Golph3 PE=1 SV=1 - [Q569C9_RAT]	1	5	0.365293	0.454811	0.321198	0.166614	0.491226	0.694495	0.693663	0.603367
Q3KRE8	Tubulin beta-2B chain OS=Rattus norvegicus OX=10116 GN=Tubb2b PE=1 SV=1 - [TBB2B_RAT]	1	251	-3.01283	-1.34004	-1.15896	-1.69582	-1.48378	-1.07666	-1.12105	-1.15602
Q7TQ70	Ac1873 OS=Rattus norvegicus OX=10116 GN=Fga PE=1 SV=1 - [Q7TQ70_RAT]	36	426	0.719842	0.27535	0.398264	0.618678	0.84875	0.997987	0.984766	0.943281
A0A0H2UHZ6	Poly(U)-binding-splicing factor PUF60 OS=Rattus norvegicus OX=10116 GN=Puf60 PE=1 SV=1 - [A0A0H2UHZ6_RAT]	13	42	0.10134	-0.0780451	0.00383982	0.384828	0.359758	0.331149	0.379853	0.343883
Q66H47	39S ribosomal protein L24, mitochondrial OS=Rattus norvegicus OX=10116 GN=Mrpl24 PE=2 SV=1 - [RM24_RAT]	4	11	-0.091404	0.334953	0.0973037	-0.166991	-0.514592	-0.514814	-0.468077	-0.424717
A0A140TAE1	Fatty acid desaturase 2 OS=Rattus norvegicus OX=10116 GN=Fads2 PE=1 SV=1 - [A0A140TAE1_RAT]	3	6	-1.62642	-1.1252	-0.452674	-0.777353	-0.958119	-0.809449	-0.600041	-0.880872
A0A0G2JUF8	DNA topoisomerase 2 OS=Rattus norvegicus OX=10116 GN=Top2a PE=1 SV=1 - [A0A0G2JUF8_RAT]	14	48	-0.573015	-0.443348	0.0748057	-0.0840722	-0.258985	-0.357142	-0.433752	-0.473161
P62489	DNA-directed RNA polymerase II subunit RPB7 OS=Rattus norvegicus OX=10116 GN=Polr2g PE=2 SV=1 - [RPB7_RAT]	2	3	0.0559087	0.0460077	0.406869	0.321709	0.311332	0.579358	0.844717	0.658412
D3ZTW1	Integrator complex subunit 5 OS=Rattus norvegicus OX=10116 GN=Ints5 PE=4 SV=1 - [D3ZTW1_RAT]	3	4	0.196569	0.218999	0.465793	0.311731	0.291716	0.311822	0.280475	0.248232
Q2YDU7	Diacylglycerol kinase epsilon OS=Rattus norvegicus OX=10116 GN=Dgke PE=2 SV=1 - [Q2YDU7_RAT]	1	1	-0.804865	-1.50021	-1.2697	-1.03132	-1.29305	-1.5995	-1.49831	-1.04732
Q9Z327	Synaptopodin OS=Rattus norvegicus OX=10116 GN=Synpo PE=1 SV=2 - [SYNPO_RAT]	16	36	-0.369867	0.0366722	-0.0919029	-0.0423286	-0.195989	-0.218923	-0.21763	-0.208723
P33274	Cytochrome P450 4F1 OS=Rattus norvegicus OX=10116 GN=Cyp4f1 PE=2 SV=1 - [CP4F1_RAT]	1	12	-0.575942	-0.38365	-0.576944	-0.710876	-0.74291	-0.553721	-0.4935	-0.615504
F1M7Q7	OTU deubiquitinase 4 OS=Rattus norvegicus OX=10116 GN=Otud4 PE=1 SV=2 - [F1M7Q7_RAT]	2	5	-0.347523	0.0702378	-0.293559	-0.100316	-0.25613	-0.233465	-0.20374	-0.307761
G3V9N0	Polyadenylate-binding protein OS=Rattus norvegicus OX=10116 GN=Pabpc4 PE=1 SV=2 - [G3V9N0_RAT]	9	69	0.00963031	0.220284	-0.155864	-0.125347	-0.267103	-0.319471	-0.346141	-0.407947
F1LRV6	GMP reductase OS=Rattus norvegicus OX=10116 GN=Gmpr PE=3 SV=1 - [F1LRV6_RAT]	2	3	0.247549	0.331589	-0.0421992	-0.0452603	-0.217024	-0.352576	-0.370835	-0.484378
B1WC56	NHP2 ribonucleoprotein OS=Rattus norvegicus OX=10116 GN=Nhp2 PE=1 SV=1 - [B1WC56_RAT]	3	16	-0.784884	-0.493575	-0.29758	-0.302249	-0.307173	-0.373408	-0.239635	-0.44911
O88823	Protein JTB OS=Rattus norvegicus OX=10116 GN=Jtb PE=2 SV=1 - [JTB_RAT]	1	2	0.546233	0.662497	-0.0365659	0.334612	0.58588	0.625765	0.507243	0.439672
G3V975	One cut domain family member OS=Rattus norvegicus OX=10116 GN=Onecut1 PE=1 SV=1 - [G3V975_RAT]	3	5	-0.133485	-0.173373	0.57519	0.343648	0.313016	0.397736	0.416675	0.440997
A8QIC3	DnaJ (Hsp40) homolog, subfamily C, member 9 (Predicted) OS=Rattus norvegicus OX=10116 GN=Dnajc9 PE=1 SV=1 - [A8QIC3_RAT]	6	11	-0.870378	-0.685432	-0.634275	-0.140192	-0.383489	-0.531092	-0.642211	-0.627266
F1M8F4	Glia maturation factor gamma OS=Rattus norvegicus OX=10116 GN=Gmfg PE=1 SV=2 - [F1M8F4_RAT]	4	11	0.611221	0.0375957	0.225874	0.463465	0.593386	0.501935	0.429005	0.405628
M0R8B6	Tubulin beta chain OS=Rattus norvegicus OX=10116 GN=Tubb1 PE=1 SV=1 - [M0R8B6_RAT]	3	57	1.13952	0.120992	0.237681	0.00448908	0.835115	1.29419	1.37718	1.25472
Q6XDA0	Spectrin beta chain OS=Rattus norvegicus OX=10116 GN=Sptb PE=1 SV=1 - [Q6XDA0_RAT]	38	99	0.75402	0.524316	0.702539	0.494045	0.506315	0.584885	0.555444	0.454723
A0A0G2JSJ8	Fucosidase, alpha-L-1, tissue, isoform CRA_a OS=Rattus norvegicus OX=10116 GN=Fuca1 PE=1 SV=1 - [A0A0G2JSJ8_RAT]	8	17	0.301337	-0.165718	0.551913	0.129492	0.350656	0.464536	0.462188	0.471238
P21571	ATP synthase-coupling factor 6, mitochondrial OS=Rattus norvegicus OX=10116 GN=Atp5j PE=1 SV=1 - [ATP5J_RAT]	8	121	-0.111223	-0.0192511	-0.318191	-0.409328	-0.721628	-0.878448	-0.877378	-0.854908
M0R915	Uncharacterized protein OS=Rattus norvegicus OX=10116 PE=4 SV=2 - [M0R915_RAT]	1	2	-0.0345421	0.290212	0.41713	0.309481	0.384912	0.502903	0.479416	0.40612
Q5XI13	Glutamate-rich WD repeat-containing protein 1 OS=Rattus norvegicus OX=10116 GN=Grwd1 PE=2 SV=1 - [GRWD1_RAT]	5	10	0.53044	0.272617	0.286333	0.445863	0.287828	0.253694	0.270973	0.330761
Q923W4	Hepatoma-derived growth factor-related protein 3 OS=Rattus norvegicus OX=10116 GN=Hdgfl3 PE=1 SV=1 - [HDGR3_RAT]	4	8	-1.4199	-0.80313	-0.790207	-0.591701	-0.751629	-0.706207	-0.844426	-0.706282
Q5XIP6	Flap endonuclease 1 OS=Rattus norvegicus OX=10116 GN=Fen1 PE=2 SV=1 - [FEN1_RAT]	3	6	-0.747355	-0.727934	-0.722756	-0.265192	-0.447162	-0.599058	-0.629974	-0.835673
Q0VGK6	RGD1562532 protein (Fragment) OS=Rattus norvegicus OX=10116 GN=RGD1562532 PE=2 SV=1 - [Q0VGK6_RAT]	1	2	0.893078	1.01643	0.995435	0.826402	0.486179	0.537224	0.641129	0.541535
A0A0G2KAI1	Phosphodiesterase OS=Rattus norvegicus OX=10116 GN=Pde1c PE=1 SV=1 - [A0A0G2KAI1_RAT]	1	4	0.427322	0.125915	0.111518	0.433661	0.484372	0.570678	0.491206	0.555827
A0A0G2K6T9	Protocadherin 1 OS=Rattus norvegicus OX=10116 GN=Pcdh1 PE=1 SV=1 - [A0A0G2K6T9_RAT]	6	8	-0.219408	-0.262579	-0.143466	-0.675579	-0.783491	-0.731883	-0.526633	-0.471701
F1LNL3	ATP-binding cassette subfamily A member 1 OS=Rattus norvegicus OX=10116 GN=Abca1 PE=1 SV=3 - [F1LNL3_RAT]	22	48	0.365386	0.65606	0.520911	0.373523	0.430001	0.527036	0.550855	0.470679
Q80YG1	Phosphoserine aminotransferase OS=Rattus norvegicus OX=10116 PE=2 SV=1 - [Q80YG1_RAT]	1	83	1.31726	0.423095	0.811037	0.747284	0.401837	0.297514	0.375348	0.352951
Q5U1Z2	Trafficking protein particle complex subunit 3 OS=Rattus norvegicus OX=10116 GN=Trappc3 PE=2 SV=1 - [TPPC3_RAT]	3	7	0.725249	0.130055	0.296163	0.0268323	0.374383	0.716655	0.657783	0.698582
Q7TPB4	CD276 antigen OS=Rattus norvegicus OX=10116 GN=Cd276 PE=2 SV=1 - [CD276_RAT]	2	6	0.704385	0.321553	0.436437	0.545631	0.560123	0.655843	0.492075	0.419369
Q3B8R6	Alpha-2-glycoprotein 1, zinc OS=Rattus norvegicus OX=10116 GN=Azgp1 PE=1 SV=1 - [Q3B8R6_RAT]	5	7	1.07425	0.834064	0.996934	0.701985	0.42854	0.390659	0.281371	0.566587
B2GV73	Actin-related protein 2/3 complex subunit 3 OS=Rattus norvegicus OX=10116 GN=Arpc3 PE=1 SV=1 - [B2GV73_RAT]	3	13	0.394932	0.31245	0.556357	0.545039	0.745278	0.941634	0.970671	0.833768
F7FLS6	Leucine zipper putative tumor suppressor 2 OS=Rattus norvegicus OX=10116 GN=Lzts2 PE=1 SV=1 - [F7FLS6_RAT]	2	4	-0.0330097	0.208107	0.0828569	0.452511	0.569042	0.499588	0.531051	0.350612
P17246	Transforming growth factor beta-1 OS=Rattus norvegicus OX=10116 GN=Tgfb1 PE=1 SV=1 - [TGFB1_RAT]	5	18	0.562631	-0.0969149	0.355446	0.350175	0.579682	0.717582	0.745159	0.866129
A9CMA5	Decay accelarating factor 1 (Fragment) OS=Rattus norvegicus OX=10116 GN=Daf1 PE=4 SV=1 - [A9CMA5_RAT]	1	2	0.732532	0.209982	0.625232	0.61869	0.633901	0.825848	0.843102	0.688059
B3GS92	Gephyrin isoform OS=Rattus norvegicus OX=10116 PE=2 SV=1 - [B3GS92_RAT]	4	7	0.208768	-0.0355465	0.116368	-0.136396	-0.506414	-0.410615	-0.393389	-0.208613
Q4V7D9	Acid sphingomyelinase-like phosphodiesterase OS=Rattus norvegicus OX=10116 GN=Smpdl3b PE=2 SV=1 - [Q4V7D9_RAT]	7	14	0.659875	0.128358	0.459028	0.374393	0.601145	0.773629	0.721372	0.668112
B2RYW9	Fumarylacetoacetate hydrolase domain-containing protein 2 OS=Rattus norvegicus OX=10116 GN=Fahd2 PE=1 SV=1 - [FAHD2_RAT]	9	20	0.510355	0.322901	0.5091	0.131398	0.218554	0.286211	0.351294	0.373208
D3ZDX5	Plexin B1 OS=Rattus norvegicus OX=10116 GN=Plxnb1 PE=1 SV=1 - [D3ZDX5_RAT]	7	9	0.422592	0.261206	0.55459	0.736685	0.613771	0.374121	0.622287	0.559669
Q99P74	Ras-related protein Rab-27B OS=Rattus norvegicus OX=10116 GN=Rab27b PE=2 SV=3 - [RB27B_RAT]	5	13	0.324672	0.278215	0.433567	-0.233932	0.96893	1.71075	1.62591	1.63456
O89035	Mitochondrial dicarboxylate carrier OS=Rattus norvegicus OX=10116 GN=Slc25a10 PE=1 SV=1 - [O89035_RAT]	4	7	-1.3031	-0.29648	-0.787686	-1.08787	-0.906853	-0.858826	-0.825392	-0.89312
A0A0G2JV05	Maestro heat-like repeat family member 1 OS=Rattus norvegicus OX=10116 GN=Mroh1 PE=1 SV=1 - [A0A0G2JV05_RAT]	1	2	-0.260024	-0.612464	-0.458349	-0.650342	-0.732064	-0.531906	-0.47266	-0.405111
G3V7R7	Solute carrier organic anion transporter family, member 6c1 OS=Rattus norvegicus OX=10116 GN=Slco6c1 PE=4 SV=3 - [G3V7R7_RAT]	1	1	0.914756	0.323896	0.190372	0.120923	0.800426	0.620537	0.532298	0.791458
F1LWN5	RGD1563482 protein OS=Rattus norvegicus OX=10116 GN=RGD1563482 PE=2 SV=2 - [F1LWN5_RAT]	1	2	-0.685014	-0.260729	-0.272627	-0.220472	-0.865546	-1.19818	-0.841845	-0.731576
C0KUC5	LIM and senescent cell antigen-like-containing domain protein OS=Rattus norvegicus OX=10116 GN=Lims1 PE=1 SV=1 - [C0KUC5_RAT]	5	18	-0.290001	-0.488566	-0.612914	-0.273458	-0.314982	-0.312265	-0.416069	-0.286839
G3V940	Coronin OS=Rattus norvegicus OX=10116 GN=Coro1b PE=1 SV=1 - [G3V940_RAT]	7	12	-0.211731	-0.258221	-0.435644	-0.25794	-0.34641	-0.368153	-0.356381	-0.615044
P46418	Glutathione S-transferase alpha-5 OS=Rattus norvegicus OX=10116 GN=Gsta5 PE=1 SV=2 - [GSTA5_RAT]	4	90	0.85006	0.37565	0.251942	0.328688	0.304747	0.309008	0.286036	0.351722
A0A0G2JZ75	Plasmalemma vesicle-associated protein OS=Rattus norvegicus OX=10116 GN=Plvap PE=4 SV=1 - [A0A0G2JZ75_RAT]	6	10	0.379777	0.287443	0.906365	0.569885	0.634468	0.996208	0.974362	0.977191
Q642E3	CDK5 regulatory subunit associated protein 3, isoform CRA_b OS=Rattus norvegicus OX=10116 GN=Cdk5rap3 PE=1 SV=1 - [Q642E3_RAT]	14	42	0.913127	0.567451	0.655974	0.735886	0.543539	0.417324	0.444645	0.430511
F8WFG6	Scavenger receptor class B member 1 OS=Rattus norvegicus OX=10116 GN=Scarb1 PE=1 SV=2 - [F8WFG6_RAT]	11	41	0.66139	0.425124	0.568495	0.115387	0.42785	0.779429	0.718599	0.675718
D3ZIQ1	Acyl-CoA thioesterase 4 OS=Rattus norvegicus OX=10116 GN=Acot4 PE=1 SV=1 - [D3ZIQ1_RAT]	3	13	-1.04006	-0.93309	-0.482975	-1.02399	-1.18304	-1.12601	-1.18928	-1.23107
G3V7V4	Ectonucleotide pyrophosphatase/phosphodiesterase family member 1 OS=Rattus norvegicus OX=10116 GN=Enpp1 PE=1 SV=3 - [G3V7V4_RAT]	6	15	0.392166	0.21831	0.530759	0.645613	0.667414	0.813744	0.883633	0.795983
G3V837	CD1d1 antigen OS=Rattus norvegicus OX=10116 GN=Cd1d1 PE=1 SV=1 - [G3V837_RAT]	6	13	1.19563	0.45831	0.659972	1.00326	1.2922	1.46615	1.38424	1.37157
P80299	Bifunctional epoxide hydrolase 2 OS=Rattus norvegicus OX=10116 GN=Ephx2 PE=1 SV=1 - [HYES_RAT]	20	56	-0.539943	-0.0335829	-0.191925	-0.707089	-0.932774	-0.919992	-0.930029	-0.90238
Q5M920	EBNA1 binding protein 2 OS=Rattus norvegicus OX=10116 GN=Ebna1bp2 PE=1 SV=1 - [Q5M920_RAT]	5	17	-0.0571474	-0.0589419	-0.0880354	0.367713	0.460253	0.401352	0.323697	0.341369
P56261	CCAAT/enhancer-binding protein epsilon OS=Rattus norvegicus OX=10116 GN=Cebpe PE=1 SV=2 - [CEBPE_RAT]	5	10	0.362048	-0.0643976	0.194332	0.475578	0.440213	0.474289	0.461982	0.569091
F1M7J7	Centrosomal protein 250 OS=Rattus norvegicus OX=10116 GN=Cep250 PE=4 SV=3 - [F1M7J7_RAT]	10	22	0.38121	0.059635	0.0719654	0.174749	0.430511	0.480474	0.453265	0.573494
F1MAN8	Laminin subunit alpha 5 OS=Rattus norvegicus OX=10116 GN=Lama5 PE=1 SV=2 - [F1MAN8_RAT]	43	157	0.179296	-0.114098	0.541335	0.2656	0.627163	0.979223	0.93211	0.885898
A0A0G2JUV7	Centrosomal protein 85 OS=Rattus norvegicus OX=10116 GN=Cep85 PE=1 SV=1 - [A0A0G2JUV7_RAT]	2	13	0.6771	0.300304	0.239493	0.85101	0.932754	0.872634	0.599689	0.582745
F8WFS9	Beta-adducin OS=Rattus norvegicus OX=10116 GN=Add2 PE=1 SV=1 - [F8WFS9_RAT]	3	5	-0.200842	-1.04044	-0.656696	-0.257555	-1.1345	-1.62244	-1.50281	-1.48102
D4A9Q3	Uncharacterized protein OS=Rattus norvegicus OX=10116 PE=3 SV=1 - [D4A9Q3_RAT]	3	11	-0.134717	0.197044	-0.253925	-0.296964	-0.537527	-0.62827	-0.803206	-0.71785
Q32PZ7	Srp72 protein (Fragment) OS=Rattus norvegicus OX=10116 GN=Srp72 PE=2 SV=1 - [Q32PZ7_RAT]	1	17	-0.970474	-0.184724	-0.701599	-0.80576	-0.807231	-0.658924	-0.679433	-0.830426
D4A974	HIC ZBTB transcriptional repressor 1 OS=Rattus norvegicus OX=10116 GN=Hic1 PE=4 SV=2 - [D4A974_RAT]	5	9	0.468282	0.108756	0.504555	0.0455031	0.213493	0.424313	0.360574	0.454597
Q6JE36	Protein NDRG1 OS=Rattus norvegicus OX=10116 GN=Ndrg1 PE=1 SV=1 - [NDRG1_RAT]	7	25	1.20242	1.50412	1.19322	1.38	1.39351	1.03467	0.960998	0.861608
O08619	Coagulation factor XIII A chain OS=Rattus norvegicus OX=10116 GN=F13a1 PE=2 SV=3 - [F13A_RAT]	1	28	1.01856	-0.157114	0.0573532	0.199933	1.21012	1.60938	1.67129	1.59886
Q4AEG0	Glycoprotein 9 OS=Rattus norvegicus OX=10116 GN=Gp9 PE=2 SV=1 - [Q4AEG0_RAT]	1	3	1.62624	0.689384	0.855408	0.22177	1.45986	2.25119	2.12497	2.29719
B1WBR1	Golgi reassembly-stacking protein 1 OS=Rattus norvegicus OX=10116 GN=Gorasp1 PE=1 SV=1 - [B1WBR1_RAT]	3	14	0.615608	0.441862	0.52325	0.592264	0.439667	0.301943	0.329347	0.575964
Q5M9I5	Cytochrome b-c1 complex subunit 6, mitochondrial OS=Rattus norvegicus OX=10116 GN=Uqcrh PE=3 SV=1 - [QCR6_RAT]	3	9	-0.360449	-0.104929	-0.46314	-0.269384	-0.688021	-1.35441	-1.18612	-1.08898
O08658	Nuclear pore complex protein Nup88 OS=Rattus norvegicus OX=10116 GN=Nup88 PE=1 SV=1 - [NUP88_RAT]	7	17	-0.216532	-0.139353	0.295178	0.37469	0.516589	0.622897	0.642588	0.584418
B2RZ12	IMP3, U3 small nucleolar ribonucleoprotein OS=Rattus norvegicus OX=10116 GN=Imp3 PE=1 SV=1 - [B2RZ12_RAT]	3	5	-0.0969378	-0.134043	0.556847	0.222574	0.408396	0.714002	0.638455	0.622278
O88767	Protein/nucleic acid deglycase DJ-1 OS=Rattus norvegicus OX=10116 GN=Park7 PE=1 SV=1 - [PARK7_RAT]	11	33	0.134996	-0.105766	-0.493177	-0.490864	-0.425563	-0.451684	-0.595023	-0.569807
D3Z9E6	Cleavage and polyadenylation specificity factor subunit 2 OS=Rattus norvegicus OX=10116 GN=Cpsf2 PE=1 SV=1 - [D3Z9E6_RAT]	7	12	-0.187961	0.10238	0.0279572	0.332672	0.324788	0.617862	0.453808	0.500297
D3ZC82	NUFIP2, FMR1-interacting protein 2 OS=Rattus norvegicus OX=10116 GN=Nufip2 PE=1 SV=2 - [D3ZC82_RAT]	10	25	-0.389547	-0.0909513	-0.611941	-0.237548	-0.397824	-0.744937	-0.726515	-0.857774
A0A0G2JWL3	Neurofibromin OS=Rattus norvegicus OX=10116 GN=Nf1 PE=1 SV=1 - [A0A0G2JWL3_RAT]	1	2	-0.0694691	-0.153672	-0.794835	-0.303348	-0.339101	-0.434592	-0.472039	-0.636405
D3ZDP2	Mitochondrial ribosomal protein L58 OS=Rattus norvegicus OX=10116 GN=Mrpl58 PE=1 SV=1 - [D3ZDP2_RAT]	5	10	-0.00669545	0.221025	-0.159171	-0.0133531	-0.493156	-0.644145	-0.658162	-0.681154
Q10743	Disintegrin and metalloproteinase domain-containing protein 10 OS=Rattus norvegicus OX=10116 GN=Adam10 PE=1 SV=2 - [ADA10_RAT]	12	16	0.115911	0.260806	0.272066	0.23852	0.363675	0.529207	0.337705	0.376851
P29419	ATP synthase subunit e, mitochondrial OS=Rattus norvegicus OX=10116 GN=Atp5me PE=1 SV=3 - [ATP5I_RAT]	4	43	-0.0995297	0.176526	-0.0270096	-0.247685	-0.415911	-0.423419	-0.540216	-0.545031
D4A3E2	Aminopeptidase-like 1 OS=Rattus norvegicus OX=10116 GN=Npepl1 PE=1 SV=2 - [D4A3E2_RAT]	10	23	-0.0349915	-0.250799	-0.668224	-0.424707	-0.745737	-0.90812	-0.7112	-0.738685
P17078	60S ribosomal protein L35 OS=Rattus norvegicus OX=10116 GN=Rpl35 PE=1 SV=3 - [RL35_RAT]	2	8	-0.581814	0.0614105	-0.933984	-1.02691	-0.80189	-0.811749	-0.922439	-0.866552
Q5M9G1	Protein HEXIM1 OS=Rattus norvegicus OX=10116 GN=Hexim1 PE=1 SV=1 - [HEXI1_RAT]	5	10	-0.457005	-0.554877	-0.731866	-0.558828	-0.717163	-0.635456	-0.544369	-0.505046
D3ZIL9	DIS3-like exonuclease 2 OS=Rattus norvegicus OX=10116 GN=Dis3l2 PE=1 SV=2 - [D3ZIL9_RAT]	3	5	-0.676976	-0.630902	-0.765058	-0.404179	-0.714303	-0.943976	-0.982344	-0.824707
D3ZXK4	Abhydrolase domain-containing 11 OS=Rattus norvegicus OX=10116 GN=Abhd11 PE=1 SV=1 - [D3ZXK4_RAT]	4	9	0.561499	0.40166	0.321127	0.0924225	0.469562	0.488931	0.577097	0.449341
D3ZIV3	Mitotic arrest deficient 1-like 1 OS=Rattus norvegicus OX=10116 GN=Mad1l1 PE=1 SV=1 - [D3ZIV3_RAT]	16	36	-0.624737	-0.382505	-0.122849	0.0965462	0.336258	0.38957	0.485616	0.410023
Q6AXS5	Plasminogen activator inhibitor 1 RNA-binding protein OS=Rattus norvegicus OX=10116 GN=Serbp1 PE=1 SV=2 - [PAIRB_RAT]	20	84	-0.173238	-0.0970866	-0.58605	-0.16898	-0.466284	-0.730986	-0.815507	-0.909452
M0RDH0	Glycine N-methyltransferase OS=Rattus norvegicus OX=10116 GN=LOC100911564 PE=3 SV=1 - [M0RDH0_RAT]	5	22	0.242754	-0.269685	-0.151046	-0.658914	-0.608456	-0.420905	-0.424938	-0.425386
F1LV13	Heterogeneous nuclear ribonucleoprotein M OS=Rattus norvegicus OX=10116 GN=Hnrnpm PE=1 SV=1 - [F1LV13_RAT]	28	128	0.114103	-0.0150755	0.0665281	0.278825	0.3931	0.433638	0.434925	0.388612
Q5RKJ2	Cytochrome b reductase 1 OS=Rattus norvegicus OX=10116 GN=Cybrd1 PE=1 SV=1 - [CYBR1_RAT]	1	2	0.356321	0.38331	0.393898	0.176739	0.49959	0.67104	0.66731	0.553207
G3V7Y3	ATP synthase subunit delta, mitochondrial OS=Rattus norvegicus OX=10116 GN=Atp5f1d PE=1 SV=1 - [G3V7Y3_RAT]	3	76	-0.0182191	0.0412858	-0.179651	-0.242996	-0.666386	-0.805428	-0.754741	-0.699142
O35814	Stress-induced-phosphoprotein 1 OS=Rattus norvegicus OX=10116 GN=Stip1 PE=1 SV=1 - [STIP1_RAT]	36	151	-0.133	-0.0322003	-0.67387	-0.270667	-0.50988	-0.738538	-0.762361	-0.690053
F1LPL6	Tyrosine-protein kinase receptor OS=Rattus norvegicus OX=10116 GN=Insr PE=1 SV=3 - [F1LPL6_RAT]	9	22	0.563196	0.664299	1.00436	0.551393	0.506026	0.583759	0.510144	0.569233
Q6AXP4	Uncharacterized protein C2orf81 homolog OS=Rattus norvegicus OX=10116 PE=1 SV=1 - [CB081_RAT]	1	1	-0.494173	-0.720041	-0.0643558	-0.192587	-0.511941	-0.411716	-0.414325	-0.309957
D3ZWP4	Smoothelin-like 1 OS=Rattus norvegicus OX=10116 GN=Smtnl1 PE=1 SV=2 - [D3ZWP4_RAT]	2	13	-3.27734		-0.547846		-3.2971	-3.54552	-3.35603	-3.49053
M0R8I6	Cyclic GMP-AMP synthase OS=Rattus norvegicus OX=10116 GN=Cgas PE=1 SV=1 - [M0R8I6_RAT]	2	3	0.0958349	0.225997	0.54416	0.31517	0.369421	0.577735	0.477687	0.476427
M0R6B7	Solute carrier family 40 member 1 OS=Rattus norvegicus OX=10116 GN=Slc40a1 PE=1 SV=1 - [M0R6B7_RAT]	1	1	0.271232	0.79297	0.422446	0.202597	0.350999	0.40197	0.224418	0.159249
Q3KR59	Ubiquitin carboxyl-terminal hydrolase 10 OS=Rattus norvegicus OX=10116 GN=Usp10 PE=1 SV=1 - [UBP10_RAT]	3	4	-0.224592	-0.0782151	-0.512216	-0.377193	-0.520326	-0.657887	-0.426479	-0.714323
F1M9A7	Acyl-coenzyme A oxidase OS=Rattus norvegicus OX=10116 GN=Acox3 PE=1 SV=2 - [F1M9A7_RAT]	13	33	-0.650676	-0.515791	-0.48802	-0.785695	-0.666529	-0.535573	-0.577807	-0.631312
A0A0G2JU43	Dynein light chain OS=Rattus norvegicus OX=10116 GN=LOC100361920 PE=3 SV=1 - [A0A0G2JU43_RAT]	1	4	0.010413	0.078331	0.376319	0.340004	0.465951	0.60375	0.528348	0.365786
A0A0G2KAW7	Eukaryotic translation initiation factor 4H OS=Rattus norvegicus OX=10116 GN=Eif4h PE=1 SV=1 - [A0A0G2KAW7_RAT]	2	11	-0.342275	-0.251991	-0.420653	-0.266066	-0.406083	-0.893983	-0.624676	-0.60593
D4ACB8	Chaperonin subunit 8 (Theta) (Predicted), isoform CRA_a OS=Rattus norvegicus OX=10116 GN=Cct8 PE=1 SV=1 - [D4ACB8_RAT]	31	226	0.18675	0.076821	0.497327	0.295233	0.586844	0.851317	0.82881	0.807372
D4AE02	Uncharacterized protein OS=Rattus norvegicus OX=10116 PE=1 SV=3 - [D4AE02_RAT]	2	4	0.284493	0.207935	0.051795	0.00139855	0.492342	0.600557	0.58142	0.418745
F1MAK1	Formin-binding protein 4 OS=Rattus norvegicus OX=10116 GN=Fnbp4 PE=1 SV=3 - [F1MAK1_RAT]	7	12	0.199044	0.0875341	-0.00536737	0.51312	0.635346	0.607264	0.61504	0.309002
Q9Z2Q7	Syntaxin-8 OS=Rattus norvegicus OX=10116 GN=Stx8 PE=1 SV=1 - [STX8_RAT]	7	16	0.220613	0.458209	0.348593	0.127285	0.592454	0.76434	0.755202	0.685206
A0A0G2K527	ARF GTPase-activating protein GIT1 OS=Rattus norvegicus OX=10116 GN=Git1 PE=1 SV=1 - [A0A0G2K527_RAT]	4	8	-0.189559	-0.274116	-0.485764	-0.642705	-0.329989	-0.335257	-0.458972	-0.38629
Q9JI04	Alpha 4 type V collagen OS=Rattus norvegicus OX=10116 GN=Col5a3 PE=2 SV=1 - [Q9JI04_RAT]	3	6	-1.32505	-1.12439	-0.769181	-0.981756	-0.909435	-0.652643	-0.692765	-0.862974
P05943	Protein S100-A10 OS=Rattus norvegicus OX=10116 GN=S100a10 PE=1 SV=2 - [S10AA_RAT]	5	40	-0.113142	-0.375508	0.245392	0.0574584	0.437071	0.587896	0.554735	0.700052
B2RYM6	Zc3hc1 protein OS=Rattus norvegicus OX=10116 GN=Zc3hc1 PE=1 SV=1 - [B2RYM6_RAT]	6	11	0.229797	-0.0461992	0.355115	0.542973	0.649266	0.741108	0.697983	0.612956
A0A0G2KAL6	Colony-stimulating factor 2 receptor alpha subunit OS=Rattus norvegicus OX=10116 GN=Csf2ra PE=1 SV=1 - [A0A0G2KAL6_RAT]	7	10	0.613314	0.303514	1.02084	0.462193	0.44899	0.822942	0.816131	0.764637
G3V778	Pyruvate dehydrogenase kinase, isoenzyme 4 OS=Rattus norvegicus OX=10116 GN=Pdk4 PE=1 SV=1 - [G3V778_RAT]	3	7	-1.19513	-0.712857	-0.889953	-0.899919	-0.906093	-0.969048	-1.01677	-1.06031
Q5U3Z5	BRI3-binding protein OS=Rattus norvegicus OX=10116 GN=Bri3bp PE=1 SV=1 - [Q5U3Z5_RAT]	3	6	0.0310889	0.242268	0.281214	0.154776	0.528004	0.759199	0.704018	0.552525
Q99ME0	CXC chemokine RTCK1 OS=Rattus norvegicus OX=10116 GN=Ppbp PE=1 SV=1 - [Q99ME0_RAT]	2	4	0.0460437	-0.834722	-0.75388	-0.263824	0.813024	1.26617	1.38012	1.4023
B2RYB8	Integrin beta OS=Rattus norvegicus OX=10116 GN=Itgb2 PE=1 SV=1 - [B2RYB8_RAT]	19	83	0.328344	-0.114576	0.396197	-0.0407084	0.393806	0.818734	0.771778	0.827783
B5DFH7	Tnf receptor-associated factor 2 OS=Rattus norvegicus OX=10116 GN=Traf2 PE=1 SV=1 - [B5DFH7_RAT]	1	2	0.389563	0.22886	0.124555	0.690453	0.586876	0.693087	0.920812	0.543958
M0R621	Uncharacterized LOC100909715 OS=Rattus norvegicus OX=10116 GN=LOC100909715 PE=1 SV=1 - [M0R621_RAT]	1	2	0.0586902	0.185804	-0.170281	-0.746923	-0.907213	-0.936307	-0.623756	-0.629051
O55171	Acyl-coenzyme A thioesterase 2, mitochondrial OS=Rattus norvegicus OX=10116 GN=Acot2 PE=1 SV=1 - [ACOT2_RAT]	7	19	-0.433986	-0.0796284	-0.433999	-0.858077	-0.619445	-0.814856	-0.824337	-1.00669
P13086	Succinate--CoA ligase [ADP/GDP-forming] subunit alpha, mitochondrial OS=Rattus norvegicus OX=10116 GN=Suclg1 PE=2 SV=2 - [SUCA_RAT]	10	56	-0.764716	-0.46843	-0.303506	-0.0884638	-0.49612	-0.723481	-0.745286	-0.817351
A0A0G2K621	Patatin-like phospholipase domain-containing 8 OS=Rattus norvegicus OX=10116 GN=Pnpla8 PE=1 SV=1 - [A0A0G2K621_RAT]	3	7	-0.113955	0.0747077	0.146533	0.0569491	-0.15152	-0.406996	-0.333252	-0.263201
B1H250	Glycine-N-acyltransferase-like 1 OS=Rattus norvegicus OX=10116 GN=Glyatl1 PE=1 SV=1 - [B1H250_RAT]	11	41	-0.382411	-0.211188	-0.312825	-0.830782	-0.699557	-0.446391	-0.485379	-0.453963
Q9EPY0	Caspase recruitment domain-containing protein 9 OS=Rattus norvegicus OX=10116 GN=Card9 PE=1 SV=1 - [CARD9_RAT]	3	5	0.606109	-0.148753	0.268208	0.332531	0.978551	1.29013	1.28183	1.40498
Q5XIL2	Phosphatidylinositol 4-kinase type 2-beta OS=Rattus norvegicus OX=10116 GN=Pi4k2b PE=2 SV=1 - [P4K2B_RAT]	2	2	-1.83125	-1.95888	-1.30529	-1.90386	-1.79919	-1.73158	-1.4473	-1.27794
Q9WV50	60S ribosome subunit biogenesis protein NIP7 homolog OS=Rattus norvegicus OX=10116 GN=Nip7 PE=2 SV=1 - [NIP7_RAT]	1	2	0.12074	-0.0270268	0.451906	0.782667	0.542693	0.335305	0.3751	0.486652
Q3ZAV8	Enhancer of mRNA-decapping protein 4 OS=Rattus norvegicus OX=10116 GN=Edc4 PE=1 SV=1 - [EDC4_RAT]	10	44	0.295501	0.0596256	0.182927	0.198203	0.407017	0.448198	0.389156	0.486185
Q5M943	THUMP domain containing 1 OS=Rattus norvegicus OX=10116 GN=Thumpd1 PE=2 SV=1 - [Q5M943_RAT]	5	9	-0.35025	-0.358827	-0.681473	-0.360134	-0.557839	-0.425038	-0.382062	-0.566532
F1LSG0	Neural Wiskott-Aldrich syndrome protein OS=Rattus norvegicus OX=10116 GN=Wasl PE=1 SV=2 - [F1LSG0_RAT]	3	11	-0.251843	-0.369178	-0.65394	-0.251618	-0.463029	-0.698131	-0.708581	-0.65072
D3ZCG2	Kinesin family member 21A OS=Rattus norvegicus OX=10116 GN=Kif21a PE=1 SV=2 - [D3ZCG2_RAT]	5	5	-0.397936	-0.302085	-0.419458	-0.684844	-0.620542	-1.045	-0.966007	-1.26579
F1LRS8	CD2-associated protein OS=Rattus norvegicus OX=10116 GN=Cd2ap PE=1 SV=2 - [CD2AP_RAT]	16	32	-0.169831	-0.18294	-0.46224	-0.147719	-0.936878	-1.14746	-1.29192	-1.31013
F7FF45	Nuclear mitotic apparatus protein 1 OS=Rattus norvegicus OX=10116 GN=Numa1 PE=1 SV=2 - [F7FF45_RAT]	3	272	0.401569	0.656485	0.757191	0.815936	0.975672	0.86472	1.06855	1.1227
D3ZUV3	Eukaryotic translation initiation factor 2A OS=Rattus norvegicus OX=10116 GN=Eif2a PE=1 SV=3 - [D3ZUV3_RAT]	11	30	-0.56154	-0.373326	-0.681661	-0.286669	-0.31941	-0.415046	-0.565306	-0.55213
D3Z8C7	WD repeat domain 48 OS=Rattus norvegicus OX=10116 GN=Wdr48 PE=1 SV=1 - [D3Z8C7_RAT]	5	7	0.217296	0.0198396	0.362697	0.206509	0.179687	0.22146	0.258079	0.39365
P24483	Adrenodoxin, mitochondrial OS=Rattus norvegicus OX=10116 GN=Fdx1 PE=2 SV=1 - [ADX_RAT]	7	23	-0.170297	-0.312247	-0.502562	-0.656007	-0.867905	-1.05139	-1.10614	-1.06524
P63255	Cysteine-rich protein 1 OS=Rattus norvegicus OX=10116 GN=Crip1 PE=1 SV=2 - [CRIP1_RAT]	3	7	-0.631244	-0.419391	-0.914821	-0.490194	-0.26308	-0.278876	-0.429635	-0.669761
A0A0H2UHT6	40S ribosomal protein S18 OS=Rattus norvegicus OX=10116 GN=Rps18 PE=1 SV=1 - [A0A0H2UHT6_RAT]	10	56	-0.511095	-0.424214	-0.587978	-0.664389	-0.588042	-0.495094	-0.488852	-0.531456
D3ZH41	Cytoskeleton-associated protein 4 OS=Rattus norvegicus OX=10116 GN=Ckap4 PE=1 SV=2 - [D3ZH41_RAT]	20	139	0.0516959	-0.268973	0.137116	0.0634246	0.280255	0.48814	0.446896	0.451896
Q7TPK1	E3 ubiquitin-protein ligase UHRF1 OS=Rattus norvegicus OX=10116 GN=Uhrf1 PE=1 SV=2 - [UHRF1_RAT]	4	6	-0.732294	-0.902136	-0.218069	0.0327472	-0.439639	-0.366997	-0.351772	-0.628496
P04550	Parathymosin OS=Rattus norvegicus OX=10116 GN=Ptms PE=1 SV=2 - [PTMS_RAT]	4	20	-0.719009	-0.962526	-1.34448	-0.805542	-1.02512	-1.2079	-1.07372	-1.08416
B0BN72	Mapk-regulated corepressor-interacting protein 1 OS=Rattus norvegicus OX=10116 GN=Mcrip1 PE=1 SV=1 - [MCRI1_RAT]	1	2	-0.301704	0.0948777	-0.570979	-0.116959	-0.38176	-0.536466	-0.576147	-0.712748
A0A0G2JYP3	Similar to swan OS=Rattus norvegicus OX=10116 GN=LOC679087 PE=4 SV=1 - [A0A0G2JYP3_RAT]	4	4	0.149328	0.367621	0.20149	0.284217	0.48831	0.672443	0.621511	0.646878
B6VNU1	Phospholipase A2 (Fragment) OS=Rattus norvegicus OX=10116 GN=Pla2g2a PE=3 SV=1 - [B6VNU1_RAT]	1	1	0.214316	-0.0992409	0.327321	-0.909634	0.754458	1.51074	1.50882	1.39257
P55051	Fatty acid-binding protein, brain OS=Rattus norvegicus OX=10116 GN=Fabp7 PE=1 SV=2 - [FABP7_RAT]	8	62	-0.28021	-0.70512	-0.513835	-0.426233	-0.722037	-0.840041	-0.806343	-0.715968
F1MAH6	Cadherin 11 OS=Rattus norvegicus OX=10116 GN=Cdh11 PE=1 SV=1 - [F1MAH6_RAT]	1	1	-1.24539	-1.81739	-0.849219	-0.429799	-0.601879	-0.39604	-0.644907	-0.836731
P23565	Alpha-internexin OS=Rattus norvegicus OX=10116 GN=Ina PE=1 SV=2 - [AINX_RAT]	6	161	-1.35017	-1.65349	-1.04224	-0.844693	-1.30306	-1.31332	-1.4002	-1.1693
Q642A8	Similar to chromosome 14 open reading frame 130 OS=Rattus norvegicus OX=10116 GN=Ubr7 PE=1 SV=1 - [Q642A8_RAT]	2	3	-0.122886	-0.31769	-0.4878	-0.292594	-0.284266	-0.534273	-0.464372	-0.304808
Q2KJ09	Ubiquitin carboxyl-terminal hydrolase 16 OS=Rattus norvegicus OX=10116 GN=Usp16 PE=1 SV=2 - [UBP16_RAT]	7	12	0.0533732	-0.124983	0.370712	0.224809	-0.238933	-0.186773	-0.152833	-0.245905
G3V702	Smu-1 suppressor of mec-8 and unc-52 homolog (C. elegans) OS=Rattus norvegicus OX=10116 GN=Smu1 PE=1 SV=1 - [G3V702_RAT]	9	22	-0.0961026	-0.222542	-0.109166	0.0776899	0.0857652	0.372536	0.314159	0.313907
Q5XIB1	Protein TSSC4 OS=Rattus norvegicus OX=10116 GN=Tssc4 PE=2 SV=1 - [TSSC4_RAT]	2	2	-0.906709	-1.02873	-0.816864	-0.78738	-0.6381	-0.771281	-0.939138	-0.490572
D4ABM3	Dishevelled associated activator of morphogenesis 1 (Predicted) OS=Rattus norvegicus OX=10116 GN=Daam1 PE=1 SV=1 - [D4ABM3_RAT]	8	15	-0.0657413	0.0810807	0.29888	-0.0751096	0.27923	0.467776	0.521361	0.521105
Q66H94	Peptidyl-prolyl cis-trans isomerase FKBP9 OS=Rattus norvegicus OX=10116 GN=Fkbp9 PE=2 SV=1 - [FKBP9_RAT]	15	51	0.0502952	-0.0549117	0.0952253	0.411775	0.440717	0.401578	0.460571	0.438745
F1M861	Uncharacterized protein OS=Rattus norvegicus OX=10116 PE=4 SV=3 - [F1M861_RAT]	3	23	1.05756	-0.271591	0.119542	0.563706	0.974614	1.08691	0.889232	0.711116
D4A8E7	COMM domain-containing 6 OS=Rattus norvegicus OX=10116 GN=Commd6 PE=1 SV=1 - [D4A8E7_RAT]	2	3	0.592985	0.206964	0.0602696	0.392866	0.368239	0.222646	0.222903	0.145431
F1LNW3	Acyl-coenzyme A oxidase OS=Rattus norvegicus OX=10116 GN=Acox2 PE=1 SV=1 - [F1LNW3_RAT]	19	72	-1.17451	-0.260677	-0.388801	-1.01734	-1.31722	-1.33221	-1.25959	-1.29482
D4A005	Euchromatic histone lysine methyltransferase 1 OS=Rattus norvegicus OX=10116 GN=Ehmt1 PE=1 SV=3 - [D4A005_RAT]	7	11	0.31135	0.224743	0.674452	0.710855	0.633319	0.543962	0.634463	0.664767
Q5I0P2	Glycine cleavage system H protein, mitochondrial OS=Rattus norvegicus OX=10116 GN=Gcsh PE=2 SV=1 - [GCSH_RAT]	1	13	-0.0114847	-0.182117	-0.532324	-0.170405	-0.547936	-1.09837	-1.34719	-1.1038
Q68FW4	Syntaxin-18 OS=Rattus norvegicus OX=10116 GN=Stx18 PE=2 SV=1 - [STX18_RAT]	1	2	0.0285225	0.203785	0.353901	0.0941115	0.65213	1.02198	0.825281	0.759954
Q68FP1	Gelsolin OS=Rattus norvegicus OX=10116 GN=Gsn PE=1 SV=1 - [GELS_RAT]	21	157	-0.0838218	-0.296848	0.105351	0.116118	0.17065	0.296473	0.220534	0.277446
P63025	Vesicle-associated membrane protein 3 OS=Rattus norvegicus OX=10116 GN=Vamp3 PE=1 SV=1 - [VAMP3_RAT]	2	27	0.170923	0.141233	0.305175	0.342936	0.330203	0.300102	0.319881	0.405745
A0A0G2K5Q0	Protein kinase C OS=Rattus norvegicus OX=10116 GN=Prkcb PE=1 SV=1 - [A0A0G2K5Q0_RAT]	1	7	0.123374	0.15231	0.560827	0.602687	0.459557	0.564599	0.705214	0.702558
D4A678	Spectrin, alpha, erythrocytic 1 OS=Rattus norvegicus OX=10116 GN=Spta1 PE=1 SV=3 - [D4A678_RAT]	62	181	1.22933	0.446896	0.782066	1.14367	0.751694	0.597056	0.597883	0.606265
A0A0G2K174	LIM domain 7 OS=Rattus norvegicus OX=10116 GN=Lmo7 PE=1 SV=1 - [A0A0G2K174_RAT]	1	120	-1.27796	-0.81607	-0.491114	-0.178656	-0.760802	-0.99909	-1.12173	-1.00735
A0A0G2JY22	Disco-interacting protein 2 homolog B OS=Rattus norvegicus OX=10116 GN=Dip2b PE=1 SV=1 - [A0A0G2JY22_RAT]	3	10	0.0268605	0.111145	-0.332721	-0.302499	-0.582238	-0.615437	-0.492726	-0.565143
B1WC67	RCG29001 OS=Rattus norvegicus OX=10116 GN=Slc25a24 PE=1 SV=1 - [B1WC67_RAT]	20	68	0.250106	0.224046	0.567989	-0.0932461	0.325653	0.598105	0.674509	0.642861
Q95571	RT1.A(U) alpha chain (Fragment) OS=Rattus norvegicus OX=10116 GN=RT1.A(u) PE=2 SV=1 - [Q95571_RAT]	3	15	0.443271	0.254881	0.904521	0.457107	0.717181	0.73198	0.732505	1.01308
D3ZS75	NADH:ubiquinone oxidoreductase subunit C1 OS=Rattus norvegicus OX=10116 GN=Ndufc1 PE=1 SV=1 - [D3ZS75_RAT]	1	2	-0.138736	-0.0438243	0.025148	0.00371564	-0.257514	-0.360487	-0.382074	-0.400905
Q9ERM7	Secretory carrier-associated membrane protein (Fragment) OS=Rattus norvegicus OX=10116 PE=2 SV=1 - [Q9ERM7_RAT]	2	8	0.135832	0.0929463	0.375718	0.0708268	0.345246	0.570677	0.594494	0.746469
B0BMS8	Myl9 protein OS=Rattus norvegicus OX=10116 GN=Myl9 PE=1 SV=1 - [B0BMS8_RAT]	4	122	-1.26273	-1.40079	-1.01924	-0.964903	-1.011	-0.952797	-1.02841	-0.984817
F1LZX9	Integrin subunit alpha V OS=Rattus norvegicus OX=10116 GN=Itgav PE=1 SV=3 - [F1LZX9_RAT]	23	70	0.369415	0.148008	0.407362	0.151516	0.241063	0.413624	0.323492	0.395168
A0A0G2K5X9	Cytochrome P450 2E1 OS=Rattus norvegicus OX=10116 GN=Cyp2e1 PE=1 SV=1 - [A0A0G2K5X9_RAT]	3	6	-2.3085	-1.93788	-1.64104	-2.12158	-1.75452	-1.35995	-1.38426	-1.30694
A0A0G2JSM4	BET1-like protein OS=Rattus norvegicus OX=10116 GN=Bet1l PE=1 SV=1 - [A0A0G2JSM4_RAT]	1	2	0.105767	0.245195	0.303875	0.287722	0.220089	0.438561	0.462651	0.252392
Q5I0E7	Transmembrane emp24 domain-containing protein 9 OS=Rattus norvegicus OX=10116 GN=Tmed9 PE=1 SV=1 - [TMED9_RAT]	10	41	0.217382	0.0412384	0.387482	0.179071	0.251022	0.520136	0.446141	0.345924
Q99MC0	Protein phosphatase 1 regulatory subunit 14A OS=Rattus norvegicus OX=10116 GN=Ppp1r14a PE=1 SV=1 - [PP14A_RAT]	1	4	-0.961709	-0.844181	-1.37292	-1.3023	-1.00391	-0.888616	-0.823259	-0.899569
Q5XIA8	Growth hormone-inducible transmembrane protein OS=Rattus norvegicus OX=10116 GN=Ghitm PE=2 SV=1 - [GHITM_RAT]	4	11	-0.65725	-0.136453	-0.372044	-0.735923	-0.752515	-0.756738	-0.800053	-0.822202
P63090	Pleiotrophin OS=Rattus norvegicus OX=10116 GN=Ptn PE=1 SV=1 - [PTN_RAT]	3	3	-1.9121	-1.33599	-0.926356	-1.15746	-0.681556	-0.474461	-0.641661	-0.619551
D3ZKU5	Uncharacterized protein OS=Rattus norvegicus OX=10116 PE=4 SV=1 - [D3ZKU5_RAT]	4	11	-0.400761	-0.0337007	-0.37476	-0.286596	-0.531146	-0.549406	-0.698965	-0.453877
P06757	Alcohol dehydrogenase 1 OS=Rattus norvegicus OX=10116 GN=Adh1 PE=1 SV=3 - [ADH1_RAT]	13	61	0.291854	-0.656276	-0.230584	-0.822449	-0.74515	-0.519215	-0.552508	-0.491705
Q498D8	Ring-box 1 OS=Rattus norvegicus OX=10116 GN=Rbx1 PE=1 SV=1 - [Q498D8_RAT]	2	2	-0.151127	-0.211118	-0.50972	-0.286741	-0.429228	-0.554912	-0.666024	-0.793322
P11240	Cytochrome c oxidase subunit 5A, mitochondrial OS=Rattus norvegicus OX=10116 GN=Cox5a PE=1 SV=1 - [COX5A_RAT]	9	207	0.276225	0.240988	0.116235	0.0491904	-0.211335	-0.336022	-0.383826	-0.282144
P29117	Peptidyl-prolyl cis-trans isomerase F, mitochondrial OS=Rattus norvegicus OX=10116 GN=Ppif PE=1 SV=2 - [PPIF_RAT]	7	63	0.017208	0.0396043	-0.221281	-0.29191	-0.613033	-0.767134	-0.857555	-0.782696
D3ZZM0	Solute carrier family 39 (Zinc transporter), member 14 (Predicted) OS=Rattus norvegicus OX=10116 GN=Slc39a14 PE=1 SV=1 - [D3ZZM0_RAT]	4	15	0.342393	0.747364	0.464981	0.360315	0.510837	0.747614	0.696183	0.780253
F1LQQ8	Beta-glucuronidase OS=Rattus norvegicus OX=10116 GN=Gusb PE=1 SV=2 - [F1LQQ8_RAT]	10	19	0.799589	0.0406333	0.692346	0.375217	0.469968	0.677919	0.628701	0.612251
F1LNC4	Vesicle transport through interaction with t-SNAREs homolog 1B OS=Rattus norvegicus OX=10116 GN=Vti1b PE=1 SV=2 - [F1LNC4_RAT]	5	10	-0.0196782	-0.00421736	0.108353	0.0145023	0.18928	0.379195	0.303158	0.489873
D4AAG8	Structural maintenance of chromosomes flexible hinge domain-containing 1 OS=Rattus norvegicus OX=10116 GN=Smchd1 PE=4 SV=2 - [D4AAG8_RAT]	5	6	0.235506	0.359055	0.565914	0.712624	0.500849	0.436585	0.44179	0.356874
P21807	Peripherin OS=Rattus norvegicus OX=10116 GN=Prph PE=1 SV=1 - [PERI_RAT]	6	101	-2.0805	-1.98898	-1.49478	-0.741298	-1.06934	-1.40804	-1.44598	-1.53469
P14480	Fibrinogen beta chain OS=Rattus norvegicus OX=10116 GN=Fgb PE=1 SV=4 - [FIBB_RAT]	30	225	0.414027	0.0507476	0.208189	0.315057	0.678299	0.945809	0.901512	0.90266
B2RZC6	Ilf2 protein OS=Rattus norvegicus OX=10116 GN=Ilf2 PE=1 SV=1 - [B2RZC6_RAT]	6	15	0.154762	0.363001	0.434284	0.159751	0.231213	0.415966	0.499642	0.401433
Q9JID1	Programmed cell death protein 4 OS=Rattus norvegicus OX=10116 GN=Pdcd4 PE=1 SV=2 - [PDCD4_RAT]	8	18	0.350475	-0.022087	0.0313907	0.347506	0.448631	0.480211	0.477989	0.510271
G0YKA8	Bok-BH3 OS=Rattus norvegicus OX=10116 PE=4 SV=1 - [G0YKA8_RAT]	1	3	0.234505	-0.00553136	0.538241	0.0855624	0.620926	0.728935	0.766899	0.96276
D3ZMY8	Pericentrin OS=Rattus norvegicus OX=10116 GN=Pcnt PE=1 SV=3 - [D3ZMY8_RAT]	19	32	-0.135602	0.131297	-0.0101403	0.253979	0.263487	0.26881	0.32309	0.411615
A0A0G2KB00	Fras1-related extracellular matrix 1 OS=Rattus norvegicus OX=10116 GN=Frem1 PE=4 SV=1 - [A0A0G2KB00_RAT]	10	16	0.199742	-0.115124	0.279215	0.37646	0.447052	0.633761	0.689372	0.641792
A0A0U1RS43	TAP-binding protein (Fragment) OS=Rattus norvegicus OX=10116 GN=Tapbp PE=1 SV=1 - [A0A0U1RS43_RAT]	2	4	-0.346161	-0.305115	0.339235	0.0214298	-0.184438	-0.136525	-0.224668	-0.216913
F1LRL9	Microtubule-associated protein 1B OS=Rattus norvegicus OX=10116 GN=Map1b PE=1 SV=1 - [F1LRL9_RAT]	3	87	-1.95461	-1.20701	-0.967345	-0.972574	-1.13662	-1.2398	-1.18819	-1.22366
Q5XIG5	G kinase-anchoring protein 1 OS=Rattus norvegicus OX=10116 GN=Gkap1 PE=1 SV=1 - [GKAP1_RAT]	2	4	-0.48076	-0.407903	-0.643745	-0.179161	-0.479943	-0.788034	-0.750854	-0.74139
D3Z853	Apoptosis and caspase activation inhibitor OS=Rattus norvegicus OX=10116 GN=Aven PE=1 SV=1 - [D3Z853_RAT]	3	5	-0.0870393	-0.364666	-0.747852	-0.421101	-0.468086	-0.502544	-0.368844	-0.544014
Q4KLH7	RAD21 cohesin complex component OS=Rattus norvegicus OX=10116 GN=Rad21 PE=1 SV=1 - [Q4KLH7_RAT]	14	48	0.0121658	-0.0648353	0.172556	0.324175	0.34859	0.483787	0.501168	0.339143
A0A0H2UHY0	Valine--tRNA ligase, mitochondrial OS=Rattus norvegicus OX=10116 GN=Vars2 PE=1 SV=1 - [A0A0H2UHY0_RAT]	2	4	-0.582508	-0.0749962	-0.178622	-0.488069	-0.505593	-0.313345	-0.360603	-0.335723
D3ZUP5	BRICK1, SCAR/WAVE actin-nucleating complex subunit OS=Rattus norvegicus OX=10116 GN=Brk1 PE=1 SV=1 - [D3ZUP5_RAT]	3	6	0.471957	-0.270117	0.0550151	0.153371	0.260547	0.445531	0.498563	0.394887
M0RCH6	Uncharacterized protein OS=Rattus norvegicus OX=10116 PE=1 SV=2 - [M0RCH6_RAT]	9	22	-0.862863	-0.858973	-0.990073	-0.641234	-0.71228	-0.774981	-0.836717	-0.735957
A0A1B0GWR5	Afadin- and alpha-actinin-binding protein (Fragment) OS=Rattus norvegicus OX=10116 GN=Ssx2ip PE=4 SV=1 - [A0A1B0GWR5_RAT]	1	4	0.0657501	0.0478567	-0.0594705	0.295351	-0.43638	-0.889852	-0.769246	-0.523502
Q4V8F9	Hydroxysteroid dehydrogenase-like protein 2 OS=Rattus norvegicus OX=10116 GN=Hsdl2 PE=2 SV=1 - [HSDL2_RAT]	7	20	0.177088	0.35851	0.272342	0.010681	-0.14557	-0.182093	-0.234379	-0.215519
A0A0G2K9P5	Component of oligomeric golgi complex 5 OS=Rattus norvegicus OX=10116 GN=Cog5 PE=1 SV=1 - [A0A0G2K9P5_RAT]	3	3	0.0843919	0.130266	0.111426	0.0193223	0.216579	0.330962	0.423407	0.304772
Q8CF97	Deubiquitinating protein VCIP135 OS=Rattus norvegicus OX=10116 GN=Vcpip1 PE=1 SV=2 - [VCIP1_RAT]	6	9	-0.102823	-0.179846	-0.968985	-0.347184	-0.380811	-0.331161	-0.411873	-0.398055
Q9JLJ3	4-trimethylaminobutyraldehyde dehydrogenase OS=Rattus norvegicus OX=10116 GN=Aldh9a1 PE=1 SV=1 - [AL9A1_RAT]	14	78	0.2735	-0.0785837	-0.102272	-0.137092	-0.318809	-0.262015	-0.317519	-0.388345
P30152	Neutrophil gelatinase-associated lipocalin OS=Rattus norvegicus OX=10116 GN=Lcn2 PE=1 SV=2 - [NGAL_RAT]	2	4	1.1338	0.827213	0.535375	-0.0407853	2.56542	3.90203	3.85533	3.94466
G3V8S6	Histidine rich calcium binding protein, isoform CRA_b OS=Rattus norvegicus OX=10116 GN=Hrc PE=1 SV=1 - [G3V8S6_RAT]	5	12	-1.8841		-0.290465	-3.81905	-2.17243	-2.01149	-2.22414	-2.09513
Q3SWT0	Platelet endothelial cell adhesion molecule OS=Rattus norvegicus OX=10116 GN=Pecam1 PE=1 SV=1 - [PECA1_RAT]	7	14	0.399499	0.68703	0.672626	0.365168	0.334065	0.466244	0.279421	0.422288
P43424	Galactose-1-phosphate uridylyltransferase OS=Rattus norvegicus OX=10116 GN=Galt PE=2 SV=1 - [GALT_RAT]	5	15	0.139259	-0.356462	-0.395395	-0.307334	-0.467918	-0.552368	-0.603055	-0.585425
F1M4V3	RCSD domain containing 1 (Predicted), isoform CRA_b OS=Rattus norvegicus OX=10116 GN=Rcsd1 PE=1 SV=2 - [F1M4V3_RAT]	2	8	-0.151248	0.0138398	-0.206782	-0.29453	-0.349478	-0.371077	-0.404967	-0.41373
Q7TS56	Carbonyl reductase family member 4 OS=Rattus norvegicus OX=10116 GN=Cbr4 PE=2 SV=1 - [CBR4_RAT]	4	8	-0.607351	-0.376577	-0.62591	-1.01624	-0.855512	-0.617216	-0.501428	-0.533544
Q4V885	Collectin-12 OS=Rattus norvegicus OX=10116 GN=Colec12 PE=2 SV=1 - [COL12_RAT]	15	27	0.0774839	-0.0340652	0.437512	0.213692	0.344907	0.511161	0.504981	0.459502
Q9ET61	Complement component C1q receptor OS=Rattus norvegicus OX=10116 GN=Cd93 PE=1 SV=1 - [C1QR1_RAT]	5	11	0.438766	0.313475	0.419438	0.201074	0.479809	0.749703	0.718231	0.633079
A0A0G2JZH0	Calcium-binding protein 39 OS=Rattus norvegicus OX=10116 GN=Cab39 PE=1 SV=1 - [A0A0G2JZH0_RAT]	11	23	0.707637	0.314244	0.315708	0.411773	0.35086	0.414827	0.563739	0.343721
B5DFC9	Nidogen-2 OS=Rattus norvegicus OX=10116 GN=Nid2 PE=2 SV=1 - [NID2_RAT]	24	122	0.195769	0.0176458	0.498722	0.342474	0.295044	0.484769	0.491601	0.51313
D3ZG00	Mediator complex subunit 30 OS=Rattus norvegicus OX=10116 GN=Med30 PE=4 SV=1 - [D3ZG00_RAT]	1	2	0.413499	0.34942	0.303634	0.311997	0.297474	0.424835	0.699804	0.574534
F1LWM8	Oxysterol-binding protein OS=Rattus norvegicus OX=10116 GN=Osbpl10 PE=3 SV=3 - [F1LWM8_RAT]	1	2	-2.35001		0.372755	-3.65879	-2.52313	-2.32602	-2.28706	-2.43198
B4F7A1	Complex III assembly factor LYRM7 OS=Rattus norvegicus OX=10116 GN=Lyrm7 PE=3 SV=1 - [LYRM7_RAT]	2	4	-0.154053	0.298825	-0.578587	-0.068552	-0.436318	-0.927225	-0.844511	-0.93878
P02680	Fibrinogen gamma chain OS=Rattus norvegicus OX=10116 GN=Fgg PE=1 SV=3 - [FIBG_RAT]	22	277	0.533589	0.10834	0.33181	0.423678	0.827123	0.951176	0.906108	0.946396
Q6MG51	Uncharacterized protein C6orf47 homolog OS=Rattus norvegicus OX=10116 GN=G4 PE=1 SV=1 - [CF047_RAT]	3	5	-0.0703213	0.11482	0.10274	0.0524177	0.248496	0.303283	0.265209	0.23252
Q6PCT5	Polyglutamine-binding protein 1 OS=Rattus norvegicus OX=10116 GN=Pqbp1 PE=2 SV=1 - [PQBP1_RAT]	5	22	-0.693305	-0.524281	-0.599217	-0.219217	-0.505407	-0.772177	-0.677801	-0.618414
A0A0G2K1A1	Zinc finger protein 706 OS=Rattus norvegicus OX=10116 GN=Zfp706 PE=1 SV=1 - [A0A0G2K1A1_RAT]	1	1	-0.557933	-0.19492	-0.611474	-0.0980318	-0.299237	-0.55685	-0.505022	-0.548685
F7ESD4	Ring finger protein 126 OS=Rattus norvegicus OX=10116 GN=Rnf126 PE=1 SV=1 - [F7ESD4_RAT]	2	3	-0.037126	-0.153246	-0.324498	-0.323709	-0.525602	-0.513097	-0.46549	-0.445133
Q4QQV2	Docking protein 1 OS=Rattus norvegicus OX=10116 GN=Dok1 PE=2 SV=1 - [DOK1_RAT]	1	1	0.107721	-0.0858062	-1.08137	-0.36719	-0.159095	-0.2619	-0.327408	-0.365823
P12075	Cytochrome c oxidase subunit 5B, mitochondrial OS=Rattus norvegicus OX=10116 GN=Cox5b PE=1 SV=2 - [COX5B_RAT]	7	194	0.123744	0.128278	0.0910863	-0.0390863	-0.293577	-0.476766	-0.446676	-0.417598
P38983	40S ribosomal protein SA OS=Rattus norvegicus OX=10116 GN=Rpsa PE=1 SV=3 - [RSSA_RAT]	10	148	0.541428	0.17202	0.186368	0.330523	0.162562	0.225779	0.139738	0.100794
F1M790	Prostaglandin F2 receptor negative regulator OS=Rattus norvegicus OX=10116 GN=Ptgfrn PE=1 SV=3 - [F1M790_RAT]	13	27	-0.0255405	-0.256738	0.106157	-0.16909	0.377883	0.822701	0.863152	0.803392
D3ZYT6	Triggering receptor-expressed on myeloid cells-like 1 OS=Rattus norvegicus OX=10116 GN=Treml1 PE=1 SV=3 - [D3ZYT6_RAT]	5	8	0.525547	0.268784	-0.1257	0.105748	0.465351	0.74391	0.601447	0.868044
Q68FW8	Bridging integrator 3 OS=Rattus norvegicus OX=10116 GN=Bin3 PE=2 SV=1 - [BIN3_RAT]	2	3	0.293882	0.0882986	-0.165238	0.0900926	0.335368	0.509764	0.463481	0.359009
G3V8T5	RuvB-like helicase OS=Rattus norvegicus OX=10116 GN=Ruvbl2 PE=1 SV=1 - [G3V8T5_RAT]	16	46	0.276355	0.0914785	0.373219	0.21613	0.306725	0.540642	0.531745	0.541478
Q8K3F3	Protein phosphatase 1 regulatory subunit 14B OS=Rattus norvegicus OX=10116 GN=Ppp1r14b PE=2 SV=1 - [PP14B_RAT]	1	5	0.0970396	-0.00856109	-0.00525507	0.251304	0.449996	0.520248	0.783772	0.583002
A0A0H2UI21	Carnitine O-acetyltransferase OS=Rattus norvegicus OX=10116 GN=Crat PE=1 SV=1 - [A0A0H2UI21_RAT]	9	24	-0.709516	-0.191074	-0.415576	-0.614692	-0.751175	-0.65193	-0.599337	-0.595281
F1M8E9	Lysozyme OS=Rattus norvegicus OX=10116 GN=Lyz2 PE=1 SV=1 - [F1M8E9_RAT]	3	69	0.27437	-0.358891	0.798025	0.114858	0.570074	1.03697	1.05135	1.0221
A0A0G2JSR8	Cytochrome P450, family 17, subfamily a, polypeptide 1 OS=Rattus norvegicus OX=10116 GN=Cyp17a1 PE=1 SV=1 - [A0A0G2JSR8_RAT]	11	24	-2.38157	-1.89177	-2.02486	-2.66703	-2.34635	-2.2445	-2.09881	-2.02459
Q5XIC0	Enoyl-CoA delta isomerase 2, mitochondrial OS=Rattus norvegicus OX=10116 GN=Eci2 PE=1 SV=1 - [ECI2_RAT]	4	51	-0.385778	0.0592887	-0.103362	-0.613769	-0.694767	-0.510734	-0.377568	-0.403409
A0A0U1RRN6	Keratin 78 OS=Rattus norvegicus OX=10116 GN=Krt78 PE=3 SV=1 - [A0A0U1RRN6_RAT]	1	71	-3.5237	-5.32339	-3.24183		-5.88823	-5.0059	-5.18583	-4.88569
F7DLY1	EPS8-like 2 OS=Rattus norvegicus OX=10116 GN=Eps8l2 PE=1 SV=2 - [F7DLY1_RAT]	7	17	-0.231345	-0.339117	-0.175728	-0.326364	-0.384334	-0.290487	-0.294383	-0.221552
Q5PQX1	Torsin-1A-interacting protein 1 OS=Rattus norvegicus OX=10116 GN=Tor1aip1 PE=1 SV=1 - [TOIP1_RAT]	7	41	0.141401	0.196719	0.683664	0.218276	0.299663	0.470248	0.52783	0.606036
Q9Z1W6	Protein LYRIC OS=Rattus norvegicus OX=10116 GN=Mtdh PE=1 SV=2 - [LYRIC_RAT]	13	33	-0.459758	-0.342287	-0.383662	-0.269739	-0.515432	-0.471444	-0.369129	-0.594568
P62083	40S ribosomal protein S7 OS=Rattus norvegicus OX=10116 GN=Rps7 PE=1 SV=1 - [RS7_RAT]	6	14	-0.477476	0.000201517	-0.315752	-0.12098	-0.517924	-0.580001	-0.479401	-0.775369
D3ZMQ3	Integrin subunit alpha 4 OS=Rattus norvegicus OX=10116 GN=Itga4 PE=1 SV=1 - [D3ZMQ3_RAT]	6	16	0.393039	-0.0998756	0.319232	0.7353	0.70814	0.600534	0.599201	0.498699
Q8VD45	UDP-glucuronosyltransferase OS=Rattus norvegicus OX=10116 PE=2 SV=1 - [Q8VD45_RAT]	1	41	-1.03827	-1.13341	-0.85514	-0.560723	-0.650735	-0.945314	-0.958005	-0.85737
G3V6L8	RCG61894, isoform CRA_a OS=Rattus norvegicus OX=10116 GN=Strn PE=1 SV=1 - [G3V6L8_RAT]	8	25	0.00801431	-0.141655	0.0880763	0.122658	0.134358	0.235554	0.20154	0.194635
D3ZJD2	ATPase family, AAA domain-containing 2 OS=Rattus norvegicus OX=10116 GN=Atad2 PE=1 SV=2 - [D3ZJD2_RAT]	3	8	-0.0888535	-0.0923576	0.487244	0.403868	0.473474	0.630598	0.577393	0.431611
F1LNT8	Vesicle-associated membrane protein 8 OS=Rattus norvegicus OX=10116 GN=Vamp8 PE=1 SV=2 - [F1LNT8_RAT]	2	8	0.423111	0.471857	0.392088	0.453994	0.784991	0.899985	1.00045	0.680312
Q4KMA2	UV excision repair protein RAD23 homolog B OS=Rattus norvegicus OX=10116 GN=Rad23b PE=1 SV=1 - [RD23B_RAT]	10	35	-0.0132684	-0.16129	-0.528487	-0.350692	-0.662989	-0.778713	-0.693667	-0.666981
Q99ND9	RWD domain-containing protein 1 OS=Rattus norvegicus OX=10116 GN=Rwdd1 PE=2 SV=1 - [RWDD1_RAT]	5	9	0.154733	-0.383239	-0.559447	-0.212395	-0.446684	-0.49401	-0.477192	-0.636833
A0A0G2K6S9	Myosin-11 OS=Rattus norvegicus OX=10116 GN=Myh11 PE=1 SV=1 - [A0A0G2K6S9_RAT]	54	340	-2.53933	-2.91091	-2.3938	-2.53853	-2.23288	-2.05872	-2.02511	-2.03913
Q8VHK7	Hepatoma-derived growth factor OS=Rattus norvegicus OX=10116 GN=Hdgf PE=1 SV=2 - [HDGF_RAT]	10	37	-0.397882	-0.471438	-0.677471	-0.132588	-0.587826	-0.915422	-1.00865	-0.892126
P70581	Nucleoporin p58/p45 OS=Rattus norvegicus OX=10116 GN=Nup58 PE=1 SV=1 - [NUP58_RAT]	9	25	-0.109597	-0.0934762	0.25502	0.272183	0.37757	0.374906	0.503178	0.442444
E9PT23	Putative sodium-coupled neutral amino acid transporter 10 OS=Rattus norvegicus OX=10116 GN=Slc38a10 PE=1 SV=2 - [S38AA_RAT]	10	28	-0.158173	0.249545	-0.0772081	-0.266135	-0.152884	-0.193617	-0.217669	-0.164717
P55213	Caspase-3 OS=Rattus norvegicus OX=10116 GN=Casp3 PE=2 SV=2 - [CASP3_RAT]	3	12	-0.265324	-0.684857	-0.857874	-0.408567	-0.615673	-0.772708	-0.78412	-0.796988
P24049	60S ribosomal protein L17 OS=Rattus norvegicus OX=10116 GN=Rpl17 PE=2 SV=3 - [RL17_RAT]	6	26	-1.0337	-0.0137826	-0.546214	-0.525984	-0.516313	-0.639734	-0.776031	-0.647402
B2RYL8	DEAD (Asp-Glu-Ala-Asp) box polypeptide 41 OS=Rattus norvegicus OX=10116 GN=Ddx41 PE=1 SV=1 - [B2RYL8_RAT]	8	13	-0.0455721	0.0445361	0.195888	0.10001	0.169246	0.163497	0.208863	0.331946
D3ZWE7	HORMA domain-containing protein 1 OS=Rattus norvegicus OX=10116 GN=Hormad1 PE=1 SV=1 - [HORM1_RAT]	1	1	1.32905	-0.0890461	0.221321	0.651102	0.745944	0.867984	0.929813	0.76848
P02692	Fatty acid-binding protein, liver OS=Rattus norvegicus OX=10116 GN=Fabp1 PE=1 SV=1 - [FABPL_RAT]	8	215	-1.11774	-1.12684	-0.821548	-0.323798	-1.09828	-1.57285	-1.62813	-1.64764
Q68FS2	COP9 signalosome complex subunit 4 OS=Rattus norvegicus OX=10116 GN=Cops4 PE=1 SV=1 - [CSN4_RAT]	10	18	0.662512	0.22657	0.0372748	0.093617	0.23338	0.241659	0.167918	0.125877
D4AAI2	Histocompatibility (Minor) HA-1 (Predicted), isoform CRA_b OS=Rattus norvegicus OX=10116 GN=Arhgap45 PE=1 SV=1 - [D4AAI2_RAT]	5	7	0.28718	0.17066	0.0275405	0.106975	0.249561	0.701602	0.674039	0.735563
Q5RJR9	Serine (Or cysteine) proteinase inhibitor, clade H, member 1, isoform CRA_b OS=Rattus norvegicus OX=10116 GN=Serpinh1 PE=1 SV=1 - [Q5RJR9_RAT]	1	218	-0.115719	-0.333928	0.101047	0.213479	0.328325	0.525234	0.604997	0.589372
Q5FWY5	AH receptor-interacting protein OS=Rattus norvegicus OX=10116 GN=Aip PE=1 SV=1 - [AIP_RAT]	6	18	-0.0011553	-0.0604149	-0.131291	0.0191031	-0.152372	-0.312254	-0.287359	-0.191958
Q5I0H3	Small ubiquitin-related modifier 1 OS=Rattus norvegicus OX=10116 GN=Sumo1 PE=1 SV=1 - [SUMO1_RAT]	2	5	0.738865	0.678329	0.508682	0.461439	0.510124	0.43373	0.231354	0.273684
P23457	3-alpha-hydroxysteroid dehydrogenase OS=Rattus norvegicus OX=10116 GN=Akr1c9 PE=1 SV=1 - [DIDH_RAT]	13	43	0.25383	-0.258355	-0.204504	-0.227591	-0.29539	-0.360724	-0.403341	-0.454757
Q6P6R6	Transglutaminase 2, C polypeptide OS=Rattus norvegicus OX=10116 GN=Tgm2 PE=2 SV=1 - [Q6P6R6_RAT]	32	486	-0.087674	-0.29213	0.340167	0.0758817	0.185744	0.396478	0.383564	0.407199
F1LRH4	Laminin subunit gamma 2 OS=Rattus norvegicus OX=10116 GN=Lamc2 PE=4 SV=1 - [F1LRH4_RAT]	2	7	0.0408681	-0.207414	0.335216	0.238226	0.578992	0.627325	0.666898	0.580765
A0A0G2K3B0	Growth factor receptor-bound protein 14 OS=Rattus norvegicus OX=10116 GN=Grb14 PE=1 SV=1 - [A0A0G2K3B0_RAT]	3	6	-0.442145	-0.672468	-0.452809	-0.300682	-0.720212	-0.648831	-0.474006	-0.40242
P12369	cAMP-dependent protein kinase type II-beta regulatory subunit OS=Rattus norvegicus OX=10116 GN=Prkar2b PE=1 SV=3 - [KAP3_RAT]	3	10	0.651241	0.131765	0.167112	0.306797	0.656285	0.679366	0.386361	0.452394
Q63058	Ash-psi OS=Rattus norvegicus OX=10116 GN=rCG_54231 PE=2 SV=1 - [Q63058_RAT]	2	9	0.654463	0.572504	0.226988	0.766163	0.76044	0.702359	0.626751	0.275333
P97675	Ectonucleotide pyrophosphatase/phosphodiesterase family member 3 OS=Rattus norvegicus OX=10116 GN=Enpp3 PE=1 SV=2 - [ENPP3_RAT]	19	77	0.899462	0.497866	0.89529	0.558269	0.38018	0.532447	0.492641	0.532409
F1M5V2	GLI pathogenesis-related 2 OS=Rattus norvegicus OX=10116 GN=Glipr2 PE=1 SV=3 - [F1M5V2_RAT]	7	22	-0.124316	0.132311	-0.0178653	0.0737892	0.621041	0.931272	0.858097	0.933291
A0A0G2JY75	General transcription factor IIIC subunit 2 OS=Rattus norvegicus OX=10116 GN=Gtf3c2 PE=1 SV=1 - [A0A0G2JY75_RAT]	3	9	-0.457082	-0.516072	-0.739901	-0.380569	-0.382818	-0.590007	-0.744824	-0.393811
Q4KM65	Cleavage and polyadenylation specificity factor subunit 5 OS=Rattus norvegicus OX=10116 GN=Nudt21 PE=2 SV=1 - [CPSF5_RAT]	9	16	0.00309042	-0.112372	-0.0248807	-0.0338595	0.541773	0.796428	0.894639	0.953289
Q6AYD5	Eukaryotic peptide chain release factor GTP-binding subunit ERF3B-like OS=Rattus norvegicus OX=10116 GN=Gspt1 PE=1 SV=1 - [Q6AYD5_RAT]	10	24	-0.0434627	-0.184718	-0.499839	-0.144573	-0.278909	-0.448762	-0.541058	-0.464571
P25030	Keratin, type I cytoskeletal 20 OS=Rattus norvegicus OX=10116 GN=Krt20 PE=1 SV=2 - [K1C20_RAT]	21	96	0.480515	-0.136053	-0.027627	0.445522	1.06031	1.22725	1.23376	1.20802
Q9JJW3	Up-regulated during skeletal muscle growth protein 5 OS=Rattus norvegicus OX=10116 GN=Usmg5 PE=1 SV=1 - [USMG5_RAT]	2	7	0.0160259	0.0388846	-0.112543	-0.0559919	-0.215443	-0.467608	-0.416424	-0.505651
F1LW70	Zinc finger and BTB domain-containing 34 OS=Rattus norvegicus OX=10116 GN=Zbtb34 PE=4 SV=2 - [F1LW70_RAT]	1	2	0.179916	0.097656	0.120399	0.140711	0.257313	0.246312	0.288979	0.326626
Q6AY80	Ribosyldihydronicotinamide dehydrogenase [quinone] OS=Rattus norvegicus OX=10116 GN=Nqo2 PE=1 SV=3 - [NQO2_RAT]	2	3	-0.280442	-0.261631	-0.935322	-1.42895	-1.13095	-0.826192	-0.442505	-0.60073
Q63187	Elongin-A OS=Rattus norvegicus OX=10116 GN=Eloa PE=1 SV=1 - [ELOA1_RAT]	5	10	-0.377272	-0.333739	-0.645907	-0.312144	-0.516821	-0.706006	-0.685915	-0.720393
P07314	Glutathione hydrolase 1 proenzyme OS=Rattus norvegicus OX=10116 GN=Ggt1 PE=1 SV=4 - [GGT1_RAT]	11	34	0.576153	0.125231	0.680862	0.0980867	0.372365	0.724419	0.70605	0.755118
F1M8M0	RAB44, member RAS oncogene family OS=Rattus norvegicus OX=10116 GN=Rab44 PE=4 SV=2 - [F1M8M0_RAT]	2	3	0.498167	0.300348	0.224808	0.173161	0.298646	0.521278	0.549101	0.54924
P0C1X8	AP2-associated protein kinase 1 OS=Rattus norvegicus OX=10116 GN=Aak1 PE=1 SV=1 - [AAK1_RAT]	8	18	-0.272303	-0.322812	-0.547356	-0.270854	-0.337222	-0.491042	-0.371007	-0.319349
Q6AXM6	Intercellular adhesion molecule 2 OS=Rattus norvegicus OX=10116 GN=Icam2 PE=1 SV=1 - [Q6AXM6_RAT]	3	5	0.465432	0.259046	0.730242	0.335341	0.109781	0.325775	0.372891	0.409823
G3V680	Beta-galactoside alpha-2,6-sialyltransferase 1 OS=Rattus norvegicus OX=10116 GN=St6gal1 PE=1 SV=1 - [G3V680_RAT]	11	35	0.180742	0.490535	0.268113	0.348405	0.515472	0.576164	0.486861	0.451679
P29067	Beta-arrestin-2 OS=Rattus norvegicus OX=10116 GN=Arrb2 PE=1 SV=1 - [ARRB2_RAT]	3	6	0.0532453	0.0563614	0.242795	0.0242378	0.54037	0.563494	0.666405	0.572754
Q91Y94	Cytochrome c oxidase subunit 4 isoform 2, mitochondrial OS=Rattus norvegicus OX=10116 GN=Cox4i2 PE=2 SV=1 - [COX42_RAT]	4	9	0.72431	1.08329	1.17281	0.363304	0.338771	0.593833	0.527458	0.472103
Q9Z254	PDZ domain-containing protein GIPC1 OS=Rattus norvegicus OX=10116 GN=Gipc1 PE=1 SV=2 - [GIPC1_RAT]	9	24	0.0591017	0.196638	0.0766801	0.313041	0.455504	0.626105	0.446142	0.571019
B5DEK0	Regulation of nuclear pre-mRNA domain-containing 1B OS=Rattus norvegicus OX=10116 GN=Rprd1b PE=1 SV=1 - [B5DEK0_RAT]	10	23	0.196326	0.0351263	0.4055	0.584528	0.379088	0.399219	0.288059	0.26895
B1H232	Immunoglobulin superfamily-containing leucine-rich repeat OS=Rattus norvegicus OX=10116 GN=Islr PE=1 SV=1 - [B1H232_RAT]	1	4	0.465228	0.0835741	0.150031	0.317652	0.51244	0.731345	0.788963	0.603618
Q641Y5	Ubiquitin-like modifier-activating enzyme ATG7 OS=Rattus norvegicus OX=10116 GN=Atg7 PE=2 SV=1 - [ATG7_RAT]	1	1	-0.647254	-0.545483	-0.416861		-0.755164	-0.663791	-0.535384	-0.556902
A0A0G2K595	Solute carrier family 23 member 1 OS=Rattus norvegicus OX=10116 GN=Slc23a1 PE=1 SV=1 - [A0A0G2K595_RAT]	2	4	0.375918	0.739862	0.544877	0.360041	0.58178	0.560316	0.315539	0.260347
D3ZGL5	PRP38 pre-mRNA processing factor 38 (Yeast) domain containing A (Predicted), isoform CRA_b OS=Rattus norvegicus OX=10116 GN=Prpf38a PE=1 SV=1 - [D3ZGL5_RAT]	2	2	0.136379	0.356379	0.483749	0.859014	0.582226	0.508047	0.576231	0.232825
D3ZBZ9	Similar to osmosis responsive factor (Predicted), isoform CRA_a OS=Rattus norvegicus OX=10116 GN=Ttc33 PE=1 SV=1 - [D3ZBZ9_RAT]	1	1	-2.9769	-1.45067	-1.28946	-2.14166	-2.90196	-2.21849	-0.996477	-3.23871
Q3ZBA0	Tectonin beta-propeller repeat-containing protein 1 OS=Rattus norvegicus OX=10116 GN=Tecpr1 PE=2 SV=1 - [TCPR1_RAT]	1	2	-0.563721	-0.671557	-0.727222	-1.13305	-0.845747	-0.668449	-0.846926	-0.71049
Q4V7C0	DSN1 homolog, MIS12 kinetochore complex component OS=Rattus norvegicus OX=10116 GN=Dsn1 PE=1 SV=1 - [Q4V7C0_RAT]	2	2	-0.104563	0.0463941	0.304057	0.274267	0.453705	0.572101	0.51541	0.385905
A0A0G2KB55	SUMO-conjugating enzyme UBC9-like OS=Rattus norvegicus OX=10116 GN=LOC102553386 PE=3 SV=1 - [A0A0G2KB55_RAT]	3	8	0.382353	0.47916	0.0748932	0.367133	0.323956	0.592727	0.426004	0.494425
P60841	Alpha-endosulfine OS=Rattus norvegicus OX=10116 GN=Ensa PE=1 SV=1 - [ENSA_RAT]	4	14	-0.264605	-0.0701401	-0.55373	-0.312815	-0.662693	-0.795874	-0.822288	-0.667284
P28037	Cytosolic 10-formyltetrahydrofolate dehydrogenase OS=Rattus norvegicus OX=10116 GN=Aldh1l1 PE=1 SV=3 - [AL1L1_RAT]	22	63	-0.35643	-0.325316	-0.654938	-1.18988	-0.917644	-0.758062	-0.759541	-0.743731
B0BN46	Glyoxylate and hydroxypyruvate reductase OS=Rattus norvegicus OX=10116 GN=Grhpr PE=1 SV=1 - [B0BN46_RAT]	5	10	-0.16162	-0.390167	-0.994378	-0.807776	-0.575375	-0.559542	-0.684242	-0.67065
D3ZCZ9	NADH dehydrogenase [ubiquinone] iron-sulfur protein 6, mitochondrial OS=Rattus norvegicus OX=10116 GN=LOC100912599 PE=1 SV=1 - [D3ZCZ9_RAT]	5	28	-0.430604	-0.156435	-0.180985	-0.220259	-0.466934	-0.687537	-0.766512	-0.67846
D4AE90	RCC1-like OS=Rattus norvegicus OX=10116 GN=Rcc1l PE=1 SV=1 - [D4AE90_RAT]	1	2	-0.349436	0.0351674	-0.256432	-0.366845	-0.566022	-0.576621	-0.535604	-0.500446
D3ZQ09	Zinc finger CCHC-type-containing 24 OS=Rattus norvegicus OX=10116 GN=Zcchc24 PE=1 SV=1 - [D3ZQ09_RAT]	1	3	-0.714487	-0.67601	-1.09042	-0.487291	-0.458939	-0.613633	-0.933735	-0.837671
Q5BJK8	Golgi integral membrane protein 4 OS=Rattus norvegicus OX=10116 GN=Golim4 PE=1 SV=2 - [GOLI4_RAT]	1	34	0.772111	0.455283	0.190746	0.549031	0.660349	0.765731	0.733317	0.711527
A0A0G2K4W3	Mediator complex subunit 12 OS=Rattus norvegicus OX=10116 GN=Med12 PE=1 SV=1 - [A0A0G2K4W3_RAT]	3	4	2.51186	0.250468	0.944669	0.640066	1.18456	1.16724	1.2829	1.61057
P13383	Nucleolin OS=Rattus norvegicus OX=10116 GN=Ncl PE=1 SV=3 - [NUCL_RAT]	34	254	-0.368896	-0.188103	-0.535949	-0.0108495	-0.523541	-0.88754	-0.902621	-0.912171
P04642	L-lactate dehydrogenase A chain OS=Rattus norvegicus OX=10116 GN=Ldha PE=1 SV=1 - [LDHA_RAT]	19	177	0.519801	0.21085	0.203525	-0.0750792	-0.301652	-0.300389	-0.304951	-0.301585
A0A0U1RRQ3	Ubiquitin-associated protein 2 OS=Rattus norvegicus OX=10116 GN=Ubap2 PE=1 SV=1 - [A0A0U1RRQ3_RAT]	12	28	0.0128877	0.200827	-0.418028	-0.0656528	-0.318724	-0.482353	-0.423082	-0.480656
D4AD15	Eukaryotic translation initiation factor 4 gamma, 1 OS=Rattus norvegicus OX=10116 GN=Eif4g1 PE=1 SV=2 - [D4AD15_RAT]	23	79	-0.129953	-0.0178461	-0.200606	-0.304312	-0.254256	-0.242328	-0.138193	-0.171673
G3V9P0	26S proteasome non-ATPase regulatory subunit 9 OS=Rattus norvegicus OX=10116 GN=Psmd9 PE=1 SV=1 - [G3V9P0_RAT]	8	26	0.169039	0.139324	-0.131593	-0.110414	-0.386605	-0.52721	-0.527512	-0.372254
D3ZCH9	CD177 molecule OS=Rattus norvegicus OX=10116 GN=Cd177 PE=4 SV=2 - [D3ZCH9_RAT]	6	19	0.334069	-0.137066	0.570976	-0.0391198	0.442995	0.936526	0.871448	0.990029
P0DN35	NADH dehydrogenase [ubiquinone] 1 beta subcomplex subunit 1 OS=Rattus norvegicus OX=10116 GN=Ndufb1 PE=3 SV=1 - [NDUB1_RAT]	1	3	-0.253856	-0.277232	-0.189828	-0.554266	-0.493428	-0.369704	-0.338074	-0.148647
D3ZYI0	Grancalcin OS=Rattus norvegicus OX=10116 GN=Gca PE=1 SV=2 - [D3ZYI0_RAT]	3	6	0.561723	-0.0339132	0.62611	-0.1005	0.595707	1.1142	1.12266	1.21669
B4F779	Adaptor protein, phosphotyrosine interaction, PH domain and leucine zipper containing 2 OS=Rattus norvegicus OX=10116 GN=Appl2 PE=1 SV=1 - [B4F779_RAT]	5	19	0.563903	0.718042	0.541704	0.326719	0.398465	0.508071	0.488081	0.433461
D4A9X9	Centromere protein K OS=Rattus norvegicus OX=10116 GN=Cenpk PE=4 SV=1 - [D4A9X9_RAT]	2	5	0.697607	-0.426085	0.652464	0.749541	0.597079	0.643717	0.667785	0.874765
P21913	Succinate dehydrogenase [ubiquinone] iron-sulfur subunit, mitochondrial OS=Rattus norvegicus OX=10116 GN=Sdhb PE=2 SV=2 - [SDHB_RAT]	18	65	0.5366	0.531924	0.491228	0.376828	0.144494	0.10533	0.0879034	0.0863954
P04176	Phenylalanine-4-hydroxylase OS=Rattus norvegicus OX=10116 GN=Pah PE=1 SV=3 - [PH4H_RAT]	6	21	-0.14561	-0.484141	-0.555114	-1.61436	-1.31898	-0.784285	-0.845474	-0.821649
F1LNF3	Nuclear transcription factor, X-box-binding-like 1 OS=Rattus norvegicus OX=10116 GN=Nfxl1 PE=1 SV=1 - [F1LNF3_RAT]	5	11	-0.0831874	0.0678199	0.117884	0.233439	0.359725	0.302546	0.186918	0.222857
D3ZWZ9	G protein-coupled receptor 107 OS=Rattus norvegicus OX=10116 GN=Gpr107 PE=1 SV=1 - [D3ZWZ9_RAT]	1	1	-1.31864	-0.46696	-0.239598	0.243254	-0.416959	-1.08502	-1.14186	-0.920713
P13264	Glutaminase kidney isoform, mitochondrial OS=Rattus norvegicus OX=10116 GN=Gls PE=1 SV=2 - [GLSK_RAT]	5	14	0.240574	0.111957	0.469498	0.384904	0.385646	0.433161	0.507709	0.544863
P16228	Cathepsin E OS=Rattus norvegicus OX=10116 GN=Ctse PE=1 SV=3 - [CATE_RAT]	1	2	0.70789	0.247106	0.875015	0.652489	0.37037	0.47745	0.356598	0.418886
Q5PQN7	Protein LZIC OS=Rattus norvegicus OX=10116 GN=Lzic PE=2 SV=1 - [LZIC_RAT]	4	6	-0.294445	-0.513953	-0.828684	-0.224529	-0.351895	-0.675919	-1.06647	-0.78898
A0A0G2K8Q8	Ubiquinol-cytochrome c reductase, complex III subunit X OS=Rattus norvegicus OX=10116 GN=Uqcr10 PE=1 SV=1 - [A0A0G2K8Q8_RAT]	1	3	-0.194371	-0.0192431	-0.101	-0.656139	-0.91997	-0.697205	-0.46168	-0.335071
Q6UPE0	Choline dehydrogenase, mitochondrial OS=Rattus norvegicus OX=10116 GN=Chdh PE=1 SV=1 - [CHDH_RAT]	16	57	-0.217481	-0.0732022	0.075666	-0.455234	-0.559645	-0.447094	-0.441232	-0.337119
P62193	26S proteasome regulatory subunit 4 OS=Rattus norvegicus OX=10116 GN=Psmc1 PE=1 SV=1 - [PRS4_RAT]	10	18	-0.116325	0.0524311	-0.340465	-0.319848	-0.366249	-0.462999	-0.37645	-0.467826
Q9R283	Short transient receptor potential channel 2 OS=Rattus norvegicus OX=10116 GN=Trpc2 PE=2 SV=2 - [TRPC2_RAT]	3	5	0.597413	0.39609	0.349893	0.401799	0.234959	0.174897	0.179583	0.183703
B2RYE8	Fam69a protein OS=Rattus norvegicus OX=10116 GN=Fam69a PE=2 SV=1 - [B2RYE8_RAT]	1	1	0.478642	0.217531	0.774405	1.00775	0.7958	0.866072	1.02885	0.891109
Q4KM73	UMP-CMP kinase OS=Rattus norvegicus OX=10116 GN=Cmpk1 PE=1 SV=2 - [KCY_RAT]	9	33	0.096167	-0.133502	-0.504607	-0.236378	-0.453113	-0.628342	-0.640383	-0.612124
D4A6U0	Non-lysosomal glucosylceramidase OS=Rattus norvegicus OX=10116 GN=Gba2 PE=1 SV=1 - [D4A6U0_RAT]	1	6	0.421306	0.420064	0.608187	0.341909	0.380628	0.690865	0.777446	0.655621
G3V8Y8	Huntingtin interacting protein 1, isoform CRA_a OS=Rattus norvegicus OX=10116 GN=Hip1 PE=1 SV=1 - [G3V8Y8_RAT]	18	31	0.0562648	0.262558	0.402236	0.250614	0.222256	0.340115	0.354975	0.385217
A0A0G2K617	RWD domain-containing protein 4 OS=Rattus norvegicus OX=10116 GN=Rwdd4 PE=1 SV=1 - [A0A0G2K617_RAT]	2	3	-0.474613	-0.308468	-0.903339	-0.345854	-0.386727	-0.663672	-0.702294	-0.757904
M0RA26	Ribosomal protein S27-like OS=Rattus norvegicus OX=10116 GN=LOC100362987 PE=3 SV=1 - [M0RA26_RAT]	3	8	-0.48139	0.0756495	-0.359922	-0.177698	-0.208005	-0.379882	-0.572654	-0.6046
G3V811	Coagulation factor XIII A chain OS=Rattus norvegicus OX=10116 GN=F13a1 PE=1 SV=1 - [G3V811_RAT]	4	32	-0.0134544	-0.334658	0.0558894	0.0654303	0.461192	0.62729	0.618458	0.387012
A0A096MJK2	Megakaryocyte and platelet inhibitory receptor G6b OS=Rattus norvegicus OX=10116 GN=Mpig6b PE=4 SV=1 - [A0A096MJK2_RAT]	1	1	0.262945	0.18499	0.380407	0.0904046	0.829904	1.28391	1.29659	1.28626
Q05030	Platelet-derived growth factor receptor beta OS=Rattus norvegicus OX=10116 GN=Pdgfrb PE=2 SV=2 - [PGFRB_RAT]	6	18	-0.0580654	-0.00962585	0.14078	-0.00449466	0.27738	0.361635	0.433943	0.540603
D3ZUC9	Oxidative-stress responsive 1 (Predicted) OS=Rattus norvegicus OX=10116 GN=Oxsr1 PE=1 SV=1 - [D3ZUC9_RAT]	5	9	0.0440781	-0.212797	-0.195205	-0.0811918	-0.313384	-0.464891	-0.415427	-0.376906
F1LPV0	Asparaginyl-tRNA synthetase OS=Rattus norvegicus OX=10116 GN=Nars PE=1 SV=2 - [F1LPV0_RAT]	5	11	-0.25534	-0.0828729	-0.420414	-0.501077	-0.531429	-0.539419	-0.553837	-0.367547
Q712U5	cAMP-regulated phosphoprotein 19 OS=Rattus norvegicus OX=10116 GN=Arpp19 PE=1 SV=3 - [ARP19_RAT]	4	17	-0.260692	-0.200415	-0.635029	-0.238636	-0.543335	-0.772286	-0.800783	-0.893937
M0R5N4	Prefoldin subunit 4 OS=Rattus norvegicus OX=10116 GN=Pfdn4 PE=1 SV=2 - [M0R5N4_RAT]	4	11	0.150233	0.0612062	-0.374294	-0.180324	-0.492165	-0.652727	-0.735627	-0.67653
G3V753	Solute carrier organic anion transporter family member OS=Rattus norvegicus OX=10116 GN=Slco2a1 PE=1 SV=2 - [G3V753_RAT]	4	9	-0.0186637	0.469991	0.333412	0.147846	0.361934	0.581401	0.56122	0.51353
G3V6I9	60S ribosomal protein L26 OS=Rattus norvegicus OX=10116 GN=Rpl26 PE=1 SV=1 - [G3V6I9_RAT]	6	14	-0.714751	-0.00973196	-0.486431	-0.423908	-0.57078	-0.613843	-0.633101	-0.767901
A0A0G2K833	Neuron navigator 2 OS=Rattus norvegicus OX=10116 GN=Nav2 PE=1 SV=1 - [A0A0G2K833_RAT]	1	2	-0.216402	-0.395989	-0.482359	-0.166354	-0.952877	-1.17434	-0.963236	-1.03629
Q5U1X1	Oligoribonuclease, mitochondrial OS=Rattus norvegicus OX=10116 GN=Rexo2 PE=2 SV=1 - [ORN_RAT]	6	12	-0.367162	-0.222805	-0.28826	-0.157681	-0.316699	-0.249635	-0.327145	-0.338169
P19225	Cytochrome P450 2C70 OS=Rattus norvegicus OX=10116 GN=Cyp2c70 PE=2 SV=1 - [CP270_RAT]	4	5	-1.19347	-0.570848	-0.607054	-1.20163	-1.22059	-1.05106	-0.881898	-0.823799
P01946	Hemoglobin subunit alpha-1/2 OS=Rattus norvegicus OX=10116 GN=Hba1 PE=1 SV=3 - [HBA_RAT]	2	1653	2.4691	1.88202	1.64394	1.68061	1.17992	1.03624	0.991328	0.96216
D4A2Y9	Peroxisomal biogenesis factor 13 OS=Rattus norvegicus OX=10116 GN=Pex13 PE=1 SV=1 - [D4A2Y9_RAT]	2	5	-0.624278	-0.50384	-0.500165	-0.46151	-0.36584	-0.493832	-0.382061	-0.420167
A0A0G2JW03	Lipin 1 OS=Rattus norvegicus OX=10116 GN=Lpin1 PE=1 SV=1 - [A0A0G2JW03_RAT]	2	3	-0.587306	0.0292616	-0.604453	-0.527864	-0.933784	-1.07712	-0.90697	-0.635851
Q01129	Decorin OS=Rattus norvegicus OX=10116 GN=Dcn PE=1 SV=1 - [PGS2_RAT]	18	157	-1.68863	-1.67484	-1.1587	-1.14326	-0.798934	-0.573618	-0.582075	-0.565591
B2RYG1	Protein FAM32A OS=Rattus norvegicus OX=10116 GN=Fam32a PE=3 SV=1 - [FA32A_RAT]	2	3	-0.478827	-0.66602	-0.507933	-0.178495	-0.372656	-0.427192	-0.398379	-0.239155
D3ZWL1	SKI-like proto-oncogene OS=Rattus norvegicus OX=10116 GN=Skil PE=4 SV=1 - [D3ZWL1_RAT]	2	3	-0.960073	0.0375737	-0.401145	-0.513061	-0.221756	-0.178189	-0.393225	-0.33897
D3ZCY4	Uncharacterized protein OS=Rattus norvegicus OX=10116 PE=3 SV=1 - [D3ZCY4_RAT]	1	30	1.07529	0.311088	1.42208	1.81251	1.36883	1.26568	1.27625	1.18503
Q641W4	Replication factor C subunit 2 OS=Rattus norvegicus OX=10116 GN=Rfc2 PE=2 SV=1 - [RFC2_RAT]	4	7	0.336881	0.136073	0.189005	0.246177	0.474034	0.47932	0.467815	0.428843
P13832	Myosin regulatory light chain RLC-A OS=Rattus norvegicus OX=10116 GN=Rlc-a PE=2 SV=2 - [MRLCA_RAT]	5	161	-0.467421	-0.677156	-0.136513	-0.108089	-0.462381	-0.54813	-0.549085	-0.411986
G3V9L4	Glycosylation dependent cell adhesion molecule 1, isoform CRA_a OS=Rattus norvegicus OX=10116 GN=Glycam1 PE=4 SV=1 - [G3V9L4_RAT]	4	9	-3.43256	-4.53101	-3.98624	-3.76282	-3.92786	-3.76898	-3.74225	-4.17445
Q4QQW2	CD40 molecule OS=Rattus norvegicus OX=10116 GN=Cd40 PE=2 SV=1 - [Q4QQW2_RAT]	1	1	-0.397653	-0.228623	0.135002	0.129529	-0.0966958	-0.21609	-0.270666	-0.411279
A0A096MJZ2	RCG21429, isoform CRA_b OS=Rattus norvegicus OX=10116 GN=Tbl2 PE=1 SV=1 - [A0A096MJZ2_RAT]	5	10	-0.0282634	0.0228178	-0.0468771	-0.389394	-0.39291	-0.332098	-0.327267	-0.174164
P02651	Apolipoprotein A-IV OS=Rattus norvegicus OX=10116 GN=Apoa4 PE=1 SV=2 - [APOA4_RAT]	22	82	-0.577963	-0.741163	-0.5892	-0.619721	-0.635344	-0.482983	-0.463528	-0.49601
Q66H12	Alpha-N-acetylgalactosaminidase OS=Rattus norvegicus OX=10116 GN=Naga PE=2 SV=1 - [NAGAB_RAT]	8	20	0.240044	0.100689	0.131822	0.177034	0.298647	0.484593	0.437922	0.369784
G3V6X1	Fibulin 2 OS=Rattus norvegicus OX=10116 GN=Fbln2 PE=1 SV=1 - [G3V6X1_RAT]	10	41	0.214276	-0.0261687	0.575543	0.524853	0.465675	0.539466	0.48468	0.472756
G3V8R3	Globin e1 OS=Rattus norvegicus OX=10116 GN=Hbz PE=3 SV=1 - [G3V8R3_RAT]	6	114	2.53793	1.9772	1.93058	2.95605	1.91282	1.37227	1.23361	1.19437
G3V6R5	Sulfite oxidase OS=Rattus norvegicus OX=10116 GN=Suox PE=1 SV=1 - [G3V6R5_RAT]	6	21	-0.00262569	-0.266635	0.290085	-0.0891717	-0.313764	-0.399557	-0.259994	-0.239015
P83565	39S ribosomal protein L40, mitochondrial OS=Rattus norvegicus OX=10116 GN=Mrpl40 PE=1 SV=2 - [RM40_RAT]	8	18	0.021567	0.117714	-0.267166	-0.219315	-0.415567	-0.717088	-0.596579	-0.58767
D4ACD5	Pleckstrin 2 OS=Rattus norvegicus OX=10116 GN=Plek2 PE=4 SV=1 - [D4ACD5_RAT]	1	1	2.48505	1.56876	2.12804	1.99559	1.81708	2.14608	1.65627	1.76134
B5DF29	Replication factor C (Activator 1) 5 OS=Rattus norvegicus OX=10116 GN=Rfc5 PE=1 SV=1 - [B5DF29_RAT]	3	4	0.285756	-0.111268	0.427465	0.0460151	0.270241	0.515797	0.539329	0.654345
F1LP44	Integrin subunit alpha L OS=Rattus norvegicus OX=10116 GN=Itgal PE=1 SV=3 - [F1LP44_RAT]	6	7	0.328496	0.386212	1.34416	0.435788	0.241744	0.618667	0.55577	0.547343
Q6IRF8	ATPase, H+ transporting, lysosomal accessory protein 1 OS=Rattus norvegicus OX=10116 GN=Atp6ap1 PE=1 SV=1 - [Q6IRF8_RAT]	4	6	0.612564	0.48126	0.859316	0.436764	0.395334	0.697184	0.735513	0.4746
F7EPH4	Pyrophosphatase (inorganic) 1 OS=Rattus norvegicus OX=10116 GN=Ppa1 PE=1 SV=1 - [F7EPH4_RAT]	12	32	0.109692	-0.0171948	-0.497033	-0.216711	-0.254244	-0.338369	-0.478957	-0.490126
D3ZRD2	Coiled-coil domain-containing 15 OS=Rattus norvegicus OX=10116 GN=Ccdc15 PE=4 SV=3 - [D3ZRD2_RAT]	1	1	2.04598	1.43919	1.18275	1.12917	0.822406	0.663094	0.777746	0.902483
Q568Z6	IST1 homolog OS=Rattus norvegicus OX=10116 GN=Ist1 PE=2 SV=1 - [IST1_RAT]	5	8	0.27201	-0.259212	0.131642	-0.0194716	0.263474	0.592937	0.626844	0.500179
F1LNV5	Calcium uptake protein 1, mitochondrial OS=Rattus norvegicus OX=10116 GN=Micu1 PE=1 SV=2 - [F1LNV5_RAT]	4	6	-0.774523	-0.615138	-1.20792	-1.7218	-0.367202	-0.786454	-0.601008	-0.450926
P15205	Microtubule-associated protein 1B OS=Rattus norvegicus OX=10116 GN=Map1b PE=1 SV=2 - [MAP1B_RAT]	1	84	-0.833133	-0.875039	-0.979374	-0.609345	-0.880168	-0.934098	-1.01757	-1.05309
Q5RKG9	Eukaryotic translation initiation factor 4B OS=Rattus norvegicus OX=10116 GN=Eif4b PE=1 SV=1 - [Q5RKG9_RAT]	10	27	-0.00355881	-0.0163387	-0.563795	-0.190549	-0.459329	-0.673404	-0.802246	-0.624025
P55770	NHP2-like protein 1 OS=Rattus norvegicus OX=10116 GN=Snu13 PE=2 SV=4 - [NH2L1_RAT]	4	20	0.0889798	0.142979	0.577792	0.661907	0.593358	0.48259	0.60469	0.663412
D4A1B9	Structural maintenance of chromosomes protein OS=Rattus norvegicus OX=10116 GN=Smc3 PE=1 SV=1 - [D4A1B9_RAT]	40	124	-0.069061	0.111581	0.422886	0.245959	0.492022	0.653317	0.641484	0.621959
Q9R066	Coxsackievirus and adenovirus receptor homolog OS=Rattus norvegicus OX=10116 GN=Cxadr PE=1 SV=2 - [CXAR_RAT]	11	33	0.65004	0.533611	0.746365	0.646214	0.532291	0.523223	0.540796	0.570297
G3V7I6	O-acyltransferase OS=Rattus norvegicus OX=10116 GN=Soat2 PE=1 SV=1 - [G3V7I6_RAT]	2	3	-1.23808	0.0906246	-0.44752	-0.861918	-1.0186	-0.887431	-0.872315	-1.24317
D4A9T0	Cask-interacting protein 2 OS=Rattus norvegicus OX=10116 GN=Caskin2 PE=1 SV=1 - [D4A9T0_RAT]	3	10	0.0576774	-0.299539	-0.491824	-0.0624566	-0.42459	-0.524455	-0.524257	-0.499538
D4A2G6	Thrombospondin 2 OS=Rattus norvegicus OX=10116 GN=Thbs2 PE=4 SV=2 - [D4A2G6_RAT]	5	7	-1.2324	-1.42378	-1.29067	-1.2748	-1.15878	-0.674002	-0.578947	-0.514212
Q9Z1M9	Structural maintenance of chromosomes protein 1A OS=Rattus norvegicus OX=10116 GN=Smc1a PE=1 SV=1 - [SMC1A_RAT]	44	105	-0.367664	-0.140184	0.121984	0.128735	0.16925	0.267581	0.234409	0.229275
P62890	60S ribosomal protein L30 OS=Rattus norvegicus OX=10116 GN=Rpl30 PE=3 SV=2 - [RL30_RAT]	6	14	-0.343092	-0.0103285	-0.410446	-0.0597777	-0.297731	-0.363582	-0.404901	-0.517741
F1LZJ4	Putative hydroxypyruvate isomerase OS=Rattus norvegicus OX=10116 GN=Hyi PE=1 SV=2 - [F1LZJ4_RAT]	13	33	-0.235999	-0.563604	-0.679392	-0.629689	-0.886281	-0.97787	-0.939655	-0.758717
D3ZMI6	Olfactomedin 4 OS=Rattus norvegicus OX=10116 GN=Olfm4 PE=4 SV=1 - [D3ZMI6_RAT]	13	68	0.864385	0.109087	0.880145	0.638346	0.666682	0.910152	0.868969	0.763124
D3ZPE6	Mitochondrial ribosomal protein L51 OS=Rattus norvegicus OX=10116 GN=Mrpl51 PE=1 SV=1 - [D3ZPE6_RAT]	1	1	-0.571442	-0.360515	-0.532801		-0.533342	-0.788093	-0.976858	-0.46202
D3ZPF0	Four and a half LIM domains 3 OS=Rattus norvegicus OX=10116 GN=Fhl3 PE=1 SV=1 - [D3ZPF0_RAT]	4	7	-0.250182	0.166948	-0.0933119	-0.211236	-0.320824	-0.349815	-0.423167	-0.454745
P41542	General vesicular transport factor p115 OS=Rattus norvegicus OX=10116 GN=Uso1 PE=1 SV=1 - [USO1_RAT]	20	56	0.0563007	0.161196	-0.150282	-0.273703	-0.207891	-0.1914	-0.251574	-0.235459
A0A0G2JT93	Catenin (Cadherin associated protein), beta 1, isoform CRA_a OS=Rattus norvegicus OX=10116 GN=Ctnnb1 PE=1 SV=1 - [A0A0G2JT93_RAT]	18	76	-0.0519672	0.160471	0.416496	0.10822	0.134822	0.291675	0.24802	0.32445
M0R6K0	Laminin subunit beta-2 OS=Rattus norvegicus OX=10116 GN=Lamb2 PE=1 SV=1 - [M0R6K0_RAT]	35	83	-0.0722615	-0.191824	0.40582	-0.0616491	0.348001	0.627314	0.66524	0.585672
Q9R105	Hemochromatosis gene product HFE splice variant delE2 OS=Rattus norvegicus OX=10116 GN=Hfe PE=1 SV=1 - [Q9R105_RAT]	1	2	0.288042	-0.289697	0.408388	0.104959	0.525265	0.773777	0.706824	0.763445
C0JPT7	Filamin A OS=Rattus norvegicus OX=10116 GN=Flna PE=1 SV=1 - [C0JPT7_RAT]	111	985	-0.154777	-0.130632	0.0266731	-0.206775	0.457507	0.855658	0.791922	0.809131
Q32KJ6	N-acetylgalactosamine-6-sulfatase OS=Rattus norvegicus OX=10116 GN=Galns PE=1 SV=1 - [GALNS_RAT]	8	27	1.10181	0.30009	0.534875	0.513616	0.57017	0.767487	0.791926	0.663893
A0A0G2K2T6	Interleukin enhancer-binding factor 3 OS=Rattus norvegicus OX=10116 GN=Ilf3 PE=1 SV=1 - [A0A0G2K2T6_RAT]	10	39	-0.447383	-0.0939865	-0.260452	-0.053004	-0.203899	-0.274816	-0.299557	-0.224274
P19836	Choline-phosphate cytidylyltransferase A OS=Rattus norvegicus OX=10116 GN=Pcyt1a PE=1 SV=2 - [PCY1A_RAT]	7	24	-0.556125	-0.411627	-0.185563	-0.195956	-0.292512	-0.334976	-0.47884	-0.491712
O88752	Epsilon 1 globin OS=Rattus norvegicus OX=10116 GN=Hbe1 PE=1 SV=1 - [O88752_RAT]	7	67	2.15809	1.58381	1.3989	2.26818	1.41966	0.953743	0.85425	0.744668
Q6P790	60S ribosomal protein L6 (Fragment) OS=Rattus norvegicus OX=10116 GN=Rpl6 PE=2 SV=1 - [Q6P790_RAT]	11	48	-0.564467	0.107104	-0.419329	-0.569948	-0.594964	-0.640866	-0.711937	-0.690441
G3V7A5	Low density lipoprotein receptor, isoform CRA_a OS=Rattus norvegicus OX=10116 GN=Ldlr PE=1 SV=1 - [G3V7A5_RAT]	7	10	0.140347	0.149107	0.282151	0.0581516	0.261171	0.436301	0.377495	0.373729
A0A0G2JUY9	Translation machinery-associated 16 homolog OS=Rattus norvegicus OX=10116 GN=Tma16 PE=1 SV=1 - [A0A0G2JUY9_RAT]	1	2	-0.859021	-0.809115	-0.710369	-0.291457	-0.32623	-0.619765	-0.622391	-0.473023
F1LXQ7	Rho GTPase-activating protein 21 OS=Rattus norvegicus OX=10116 GN=Arhgap21 PE=1 SV=3 - [F1LXQ7_RAT]	8	12	0.21786	0.373372	0.472959	0.237832	0.34895	0.444272	0.319821	0.310352
O35394	Prenylated Rab acceptor protein 1 OS=Rattus norvegicus OX=10116 GN=Rabac1 PE=1 SV=1 - [PRAF1_RAT]	2	5	0.0525241	0.448161	0.311978	0.183584	0.622123	0.688131	0.605416	0.571116
B1WC26	N-acetylneuraminate synthase OS=Rattus norvegicus OX=10116 GN=Nans PE=1 SV=1 - [B1WC26_RAT]	7	15	0.0317951	-0.250932	-0.348857	-0.25043	-0.369276	-0.432942	-0.327717	-0.267973
D3Z9K8	NSE4 homolog A, SMC5-SMC6 complex component OS=Rattus norvegicus OX=10116 GN=Nsmce4a PE=4 SV=2 - [D3Z9K8_RAT]	1	1	0.951466	0.526492	0.952912	0.630524	0.579923	0.892315	1.27811	1.46561
D3ZAI0	U2 snRNP-associated SURP domain-containing OS=Rattus norvegicus OX=10116 GN=U2surp PE=1 SV=1 - [D3ZAI0_RAT]	12	23	-0.209219	0.0350988	0.0218677	0.178735	0.422687	0.528671	0.526233	0.495296
D3ZTW9	Endonuclease G-like 1 (Predicted), isoform CRA_d OS=Rattus norvegicus OX=10116 GN=Exog PE=1 SV=1 - [D3ZTW9_RAT]	1	4	0.323519	0.362919	0.546495	0.169757	0.535236	0.72127	0.677313	0.41497
Q4KLI4	Peptidyl-prolyl cis-trans isomerase OS=Rattus norvegicus OX=10116 GN=Ppil1 PE=1 SV=1 - [Q4KLI4_RAT]	6	16	-0.0774998	-0.0573056	0.0954897	0.111294	0.290454	0.453936	0.414765	0.382018
F2Z3Q8	Importin subunit beta-1 OS=Rattus norvegicus OX=10116 GN=Kpnb1 PE=1 SV=1 - [F2Z3Q8_RAT]	20	85	0.43961	0.195975	0.396331	0.180839	0.315833	0.487488	0.570761	0.496676
G3V722	Beta-1,4-galactosyltransferase 1 OS=Rattus norvegicus OX=10116 GN=B4galt1 PE=1 SV=1 - [G3V722_RAT]	4	7	0.206356	0.769836	0.256748	0.255719	0.242946	0.234358	0.350029	0.241446
F1M7Y3	RAP1, GTP-GDP dissociation stimulator 1 (Predicted), isoform CRA_b OS=Rattus norvegicus OX=10116 GN=Rap1gds1 PE=1 SV=2 - [F1M7Y3_RAT]	8	14	0.656705	0.349999	0.395941	0.231429	0.272971	0.435254	0.45915	0.451293
P63029	Translationally-controlled tumor protein OS=Rattus norvegicus OX=10116 GN=Tpt1 PE=1 SV=1 - [TCTP_RAT]	4	29	0.426099	0.164429	-0.300093	-0.163496	-0.236716	-0.340061	-0.407247	-0.38193
F1LRM6	Phosphatidylinositol-glycan biosynthesis class X protein OS=Rattus norvegicus OX=10116 GN=Pigx PE=4 SV=3 - [F1LRM6_RAT]	1	2	0.469753	0.59433	0.80964	0.644431	0.381823	0.456471	0.528919	0.516529
D4A208	SLIT-ROBO Rho GTPase-activating protein 2 OS=Rattus norvegicus OX=10116 GN=Srgap2 PE=1 SV=1 - [SRGP2_RAT]	4	7	0.32241	0.112028	0.0529735	0.238675	0.239623	0.204084	0.232319	0.145294
Q9JMB5	Proteasomal ubiquitin receptor ADRM1 OS=Rattus norvegicus OX=10116 GN=Adrm1 PE=1 SV=2 - [ADRM1_RAT]	2	4	0.0449122	-0.113428	-0.231217	-0.26871	-0.560362	-0.655999	-0.458603	-0.456457
Q3T1I9	RNA polymerase II-associated protein 1 OS=Rattus norvegicus OX=10116 GN=Rpap1 PE=1 SV=1 - [RPAP1_RAT]	1	1	-0.468569	0.233664	0.224625		-0.697674	-0.676609	-0.684404	-0.579167
D3ZG74	Fras1-related extracellular matrix protein 2 OS=Rattus norvegicus OX=10116 GN=Frem2 PE=4 SV=2 - [D3ZG74_RAT]	55	155	0.270922	0.0898561	0.583609	0.114587	0.52931	0.829248	0.787087	0.874939
A0A140TAF5	Chloride channel CLIC-like 1, isoform CRA_c OS=Rattus norvegicus OX=10116 GN=Clcc1 PE=1 SV=1 - [A0A140TAF5_RAT]	6	16	0.253029	0.363312	0.588686	0.439192	0.338487	0.441847	0.416264	0.517598
E9PSX7	HIRA-interacting protein 3 OS=Rattus norvegicus OX=10116 GN=Hirip3 PE=1 SV=1 - [E9PSX7_RAT]	2	2	-0.705131	-0.248139	0.0235845	0.191517	0.404634	0.511909	0.536551	0.624253
Q3T1J1	Eukaryotic translation initiation factor 5A-1 OS=Rattus norvegicus OX=10116 GN=Eif5a PE=1 SV=3 - [IF5A1_RAT]	12	144	-0.100094	-0.0723352	-0.577132	-0.113405	-0.361106	-0.57827	-0.608302	-0.607054
D3ZIC2	Urocanate hydratase 1 OS=Rattus norvegicus OX=10116 GN=Uroc1 PE=1 SV=2 - [D3ZIC2_RAT]	11	21	0.591058	-0.208539	-0.183934	-0.626803	-0.523235	-0.381243	-0.309511	-0.294107
Q64350	Translation initiation factor eIF-2B subunit epsilon OS=Rattus norvegicus OX=10116 GN=Eif2b5 PE=1 SV=2 - [EI2BE_RAT]	5	9	0.152314	0.0825428	-0.186603	-0.697828	-0.575193	-0.366071	-0.318613	-0.428149
B2RZ56	Mediator complex subunit 27 OS=Rattus norvegicus OX=10116 GN=Med27 PE=2 SV=1 - [B2RZ56_RAT]	1	2	0.451441	0.48081	0.559689	0.654715	1.44293	1.04737	0.930731	0.830368
O55006	Protein RoBo-1 OS=Rattus norvegicus OX=10116 PE=1 SV=1 - [ROB1_RAT]	4	24	0.498613	-0.1737	0.395922	0.378452	0.638539	0.891739	0.823778	0.662656
D3Z8P1	Ring finger protein 7 OS=Rattus norvegicus OX=10116 GN=Rnf7 PE=1 SV=1 - [D3Z8P1_RAT]	1	2	-0.384798	-0.276665	-0.494048	-0.5893	-0.575732	-0.629296	-0.464568	-0.452568
A0A0G2JZ38	Formin homology 2 domain-containing 1 OS=Rattus norvegicus OX=10116 GN=Fhod1 PE=1 SV=1 - [A0A0G2JZ38_RAT]	3	3	0.376642	0.199112	-0.118824	-0.180871	0.121583	0.393589	0.568386	0.700162
A0A0G2KAU9	Proline-rich coiled-coil 2B OS=Rattus norvegicus OX=10116 GN=Prrc2b PE=1 SV=1 - [A0A0G2KAU9_RAT]	9	18	-0.320576	-0.278848	-0.27736	-0.170436	-0.22742	-0.474709	-0.616821	-0.640888
F1LPH1	Calpastatin OS=Rattus norvegicus OX=10116 GN=Cast PE=1 SV=1 - [F1LPH1_RAT]	14	42	-0.147938	-0.362839	-0.645666	-0.335829	-0.414263	-0.72065	-0.685287	-0.8169
Q6AYQ1	Golgin subfamily A member 7 OS=Rattus norvegicus OX=10116 GN=Golga7 PE=2 SV=1 - [GOGA7_RAT]	2	4	0.225006	0.371559	0.322486	-0.113576	0.419243	0.661329	0.793616	0.701005
Q642C0	DnaJ homolog subfamily C member 8 OS=Rattus norvegicus OX=10116 GN=Dnajc8 PE=2 SV=1 - [DNJC8_RAT]	8	24	-0.354507	-0.309305	-0.817603	-0.329103	-0.439081	-0.605567	-0.692162	-0.574507
P20411	High affinity immunoglobulin epsilon receptor subunit gamma OS=Rattus norvegicus OX=10116 GN=Fcer1g PE=1 SV=1 - [FCERG_RAT]	3	13	0.341061	0.0536906	0.390099	0.206613	0.187791	0.552855	0.444284	0.429837
D4A5U3	Protein-glutamine gamma-glutamyltransferase E OS=Rattus norvegicus OX=10116 GN=Tgm3 PE=3 SV=1 - [TGM3_RAT]	3	5	-3.88117	-3.03647	-3.02697	-3.24991	-3.37871	-3.16823	-2.93885	-3.50603
Q7TPB1	T-complex protein 1 subunit delta OS=Rattus norvegicus OX=10116 GN=Cct4 PE=1 SV=3 - [TCPD_RAT]	24	127	0.0492257	-0.024313	0.281772	0.0144916	0.506057	0.770143	0.753461	0.779252
F1LWQ2	Tumor necrosis factor receptor superfamily member 6 OS=Rattus norvegicus OX=10116 GN=Fas PE=1 SV=3 - [F1LWQ2_RAT]	1	2	0.576559	0.536323	0.435833	0.507553	0.819596	0.941297	0.787417	0.759613
D4ABK7	Heterogeneous nuclear ribonucleoprotein H3 (2H9) (Predicted), isoform CRA_c OS=Rattus norvegicus OX=10116 GN=Hnrnph3 PE=1 SV=1 - [D4ABK7_RAT]	6	19	0.525439	0.460174	0.235534	0.379687	0.346162	0.29607	0.306115	0.391142
P20291	Arachidonate 5-lipoxygenase-activating protein OS=Rattus norvegicus OX=10116 GN=Alox5ap PE=1 SV=2 - [AL5AP_RAT]	1	1	0.858721	0.220378	0.0772643	0.434762	0.614993	0.632244	0.745108	0.526656
B2RZ48	Bardet-Biedl syndrome 5 OS=Rattus norvegicus OX=10116 GN=Bbs5 PE=2 SV=1 - [B2RZ48_RAT]	1	1	1.22475	0.770157	1.01058	1.07388	0.701704	0.685752	0.631556	0.696671
Q64361	Latexin OS=Rattus norvegicus OX=10116 GN=Lxn PE=1 SV=1 - [LXN_RAT]	2	4	-0.885601	-0.902016	-0.523361	-0.439146	-0.614486	-0.584684	-0.50621	-0.580044
D3ZVF4	Trafficking protein particle complex subunit 2 OS=Rattus norvegicus OX=10116 GN=Trappc2 PE=3 SV=1 - [TPPC2_RAT]	1	2	0.453889	0.386509	0.484118	0.262418	0.544812	0.593375	0.459118	0.448604
D4A6P1	RCG40132, isoform CRA_a OS=Rattus norvegicus OX=10116 GN=Sez6l2 PE=4 SV=1 - [D4A6P1_RAT]	1	2	-1.96508	-1.14368	-1.17562	-1.4793	-1.08756	-0.892277	-0.633555	-0.65922
Q4G075	Leukocyte elastase inhibitor A OS=Rattus norvegicus OX=10116 GN=Serpinb1a PE=1 SV=1 - [ILEUA_RAT]	13	25	0.254933	-0.151176	0.145989	-0.152424	0.323933	0.64277	0.574205	0.643679
Q5PQL2	CCR4-NOT transcription complex subunit 9 OS=Rattus norvegicus OX=10116 GN=Cnot9 PE=1 SV=1 - [CNOT9_RAT]	1	2	0.539629	-0.0619565	0.281846	0.165629	0.333616	0.733458	1.00738	0.908293
P50475	Alanine--tRNA ligase, cytoplasmic OS=Rattus norvegicus OX=10116 GN=Aars PE=1 SV=3 - [SYAC_RAT]	10	14	-0.00494808	-0.0445153	-0.412931	-0.303286	-0.188388	-0.316514	-0.319921	-0.353771
F1LPK7	Plastin 3 (T-isoform), isoform CRA_a OS=Rattus norvegicus OX=10116 GN=Pls3 PE=1 SV=2 - [F1LPK7_RAT]	11	40	-0.309046	-0.444715	-0.178494	0.0878759	0.221271	0.287092	0.236381	0.208143
P48500	Triosephosphate isomerase OS=Rattus norvegicus OX=10116 GN=Tpi1 PE=1 SV=2 - [TPIS_RAT]	5	277	0.527592	0.829164	0.148119	0.112499	-0.427263	-0.502659	-0.542618	-0.504772
Q63921	Prostaglandin G/H synthase 1 OS=Rattus norvegicus OX=10116 GN=Ptgs1 PE=2 SV=2 - [PGH1_RAT]	4	8	0.683999	0.68128	1.18405	0.458208	0.50253	0.77278	0.570165	0.573017
D4A2Y7	N-acetylated alpha-linked acidic dipeptidase 2 OS=Rattus norvegicus OX=10116 GN=Naalad2 PE=4 SV=1 - [D4A2Y7_RAT]	1	1	2.16956	1.1169	1.46301	0.665999	0.630414	0.736685	0.432664	0.487477
P45592	Cofilin-1 OS=Rattus norvegicus OX=10116 GN=Cfl1 PE=1 SV=3 - [COF1_RAT]	15	153	-0.611617	-0.463851	-0.822795	-0.231485	-0.481226	-0.678091	-0.764017	-0.755635
A0A0G2JWZ2	Amine oxidase OS=Rattus norvegicus OX=10116 PE=3 SV=1 - [A0A0G2JWZ2_RAT]	10	27	0.130434	-0.206904	-0.0345286	-0.249814	0.246369	0.390577	0.408921	0.444711
Q4V8K2	Beta-catenin-like protein 1 OS=Rattus norvegicus OX=10116 GN=Ctnnbl1 PE=1 SV=1 - [CTBL1_RAT]	7	11	0.245874	0.227986	0.0733878	0.348012	0.503258	0.507995	0.506192	0.487631
Q641Z8	Peflin OS=Rattus norvegicus OX=10116 GN=Pef1 PE=2 SV=1 - [PEF1_RAT]	3	10	0.911606	0.181193	0.781816	0.559574	0.389794	0.715813	0.556848	0.640362
F1LRN8	Neural precursor cell-expressed, developmentally down-regulated 4-like, E3 ubiquitin protein ligase OS=Rattus norvegicus OX=10116 GN=Nedd4l PE=1 SV=3 - [F1LRN8_RAT]	7	17	0.438878	0.491794	0.545518	0.357927	0.304367	0.383594	0.421033	0.32693
D3ZAP6	Similar to hypothetical protein OS=Rattus norvegicus OX=10116 GN=RGD1563056 PE=4 SV=1 - [D3ZAP6_RAT]	1	3	1.60801	0.952572	1.02718	1.476	1.14304	0.909679	0.480466	0.799276
G3V857	Growth arrest-specific 2 OS=Rattus norvegicus OX=10116 GN=Gas2 PE=1 SV=1 - [G3V857_RAT]	6	10	0.229628	0.0651186	0.185496	0.626044	0.443134	0.353794	0.299433	0.160093
Q5XIW9	Flot2 protein OS=Rattus norvegicus OX=10116 GN=Flot2 PE=1 SV=1 - [Q5XIW9_RAT]	17	34	0.205898	0.154969	0.456493	0.136307	0.165616	0.25769	0.308104	0.289457
Q66H39	ATP-binding cassette sub-family F member 3 OS=Rattus norvegicus OX=10116 GN=Abcf3 PE=2 SV=1 - [ABCF3_RAT]	2	2	-0.925997	-0.39744	-0.318127	-0.317257	-0.668883	-1.00707	-0.504472	-1.26987
Q8VHJ9	Nesprin-1 OS=Rattus norvegicus OX=10116 PE=2 SV=1 - [Q8VHJ9_RAT]	15	26	0.179646	0.125723	0.591669	0.284916	0.241964	0.653438	0.644614	0.701505
F1M2K6	Plakophilin 4 OS=Rattus norvegicus OX=10116 GN=Pkp4 PE=1 SV=2 - [F1M2K6_RAT]	17	40	0.127088	0.356873	0.44366	0.472014	0.383539	0.247513	0.31292	0.197747
D3ZQL0	Fanconi anemia, complementation group A OS=Rattus norvegicus OX=10116 GN=Fanca PE=4 SV=3 - [D3ZQL0_RAT]	1	3	-1.74415	-1.60686	-1.00669	-1.39407	-1.20021	-0.662914	-0.507608	-0.451871
Q7TP52	Carboxymethylenebutenolidase homolog OS=Rattus norvegicus OX=10116 GN=Cmbl PE=2 SV=1 - [CMBL_RAT]	4	13	0.220429	-0.379574	-0.23826	-0.506703	-0.438021	-0.367615	-0.41022	-0.271743
P21744	Insulin-like growth factor-binding protein 4 OS=Rattus norvegicus OX=10116 GN=Igfbp4 PE=1 SV=2 - [IBP4_RAT]	1	2	-0.649831	-0.953702	-0.762323	-0.400526	-0.998992	-1.0732	-1.22587	-1.15984
Q5U2X0	CDKN2A-interacting protein OS=Rattus norvegicus OX=10116 GN=Cdkn2aip PE=1 SV=1 - [CARF_RAT]	4	4	0.454841	0.339872	-0.0143605	0.332181	0.577298	0.344385	0.250218	0.322567
Q6AY58	B-cell receptor-associated protein 31 OS=Rattus norvegicus OX=10116 GN=Bcap31 PE=1 SV=1 - [Q6AY58_RAT]	12	54	0.030877	0.0273911	0.168008	0.0109885	0.087461	0.239929	0.166679	0.218798
Q6P7P5	Basic leucine zipper and W2 domain-containing protein 1 OS=Rattus norvegicus OX=10116 GN=Bzw1 PE=1 SV=1 - [BZW1_RAT]	11	32	0.5939	0.262042	0.235676	0.323849	0.266626	0.301203	0.304222	0.276787
P05370	Glucose-6-phosphate 1-dehydrogenase OS=Rattus norvegicus OX=10116 GN=G6pdx PE=1 SV=3 - [G6PD_RAT]	13	29	0.269581	0.411014	0.292963	-0.0796345	0.437532	0.814805	0.81413	0.755708
D3ZP13	Sulfhydryl oxidase OS=Rattus norvegicus OX=10116 GN=Qsox2 PE=1 SV=1 - [D3ZP13_RAT]	2	4	0.436726	0.474752	0.29277	0.162984	0.53692	0.579715	0.729693	0.647267
A0A0G2K2P6	HBS1-like protein OS=Rattus norvegicus OX=10116 GN=Hbs1l PE=1 SV=1 - [A0A0G2K2P6_RAT]	9	15	0.191975	0.136015	-0.0218405	0.100239	-0.15546	-0.213041	-0.294402	-0.363053
Q6LDS4	Superoxide dismutase [Cu-Zn] OS=Rattus norvegicus OX=10116 PE=2 SV=1 - [Q6LDS4_RAT]	6	70	-0.0730568	-0.289064	-0.552293	-0.319632	-0.630261	-0.722297	-0.885854	-0.724167
P41499	Tyrosine-protein phosphatase non-receptor type 11 OS=Rattus norvegicus OX=10116 GN=Ptpn11 PE=1 SV=4 - [PTN11_RAT]	4	7	-0.43555	-0.329814	-0.679573	-0.576761	-0.390441	-0.406176	-0.344374	-0.302096
Q5RKI9	Ribosome-recycling factor, mitochondrial OS=Rattus norvegicus OX=10116 GN=Mrrf PE=2 SV=1 - [RRFM_RAT]	4	9	-0.610775	-0.0367774	-0.437868	-0.191597	-0.637274	-0.698768	-0.549199	-0.546816
A0A0G2JW88	Microtubule-associated protein OS=Rattus norvegicus OX=10116 GN=Map4 PE=1 SV=1 - [A0A0G2JW88_RAT]	15	177	-1.00322	-0.108267	-0.48128	-0.117618	-0.708965	-0.854634	-0.975276	-1.00066
A9UMV9	NADH:ubiquinone oxidoreductase subunit A7 OS=Rattus norvegicus OX=10116 GN=Ndufa7 PE=1 SV=1 - [A9UMV9_RAT]	9	46	-0.11017	0.0604646	-0.0507691	-0.0396073	-0.138379	-0.200363	-0.235391	-0.288645
G3V7V8	Phosphodiesterase OS=Rattus norvegicus OX=10116 GN=Pde5a PE=1 SV=1 - [G3V7V8_RAT]	2	2	0.889202	0.331985	-0.248359	-0.186423	0.427231	0.776163	0.736722	0.605344
A0A0G2JZZ3	Cap-binding complex-dependent translation initiation factor OS=Rattus norvegicus OX=10116 GN=Ctif PE=1 SV=1 - [A0A0G2JZZ3_RAT]	2	3	-0.303892	-0.436613	-0.430802	-0.216689	-0.27778	-0.408378	-0.418408	-0.387493
A0JPP1	Dr1-associated corepressor OS=Rattus norvegicus OX=10116 GN=Drap1 PE=2 SV=1 - [NC2A_RAT]	1	3	-1.11188	-0.726044	-0.602873	-0.53635	-0.607576	-0.480908	-0.396062	-0.552766
F1M049	Ataxin 2 OS=Rattus norvegicus OX=10116 GN=Atxn2 PE=1 SV=3 - [F1M049_RAT]	13	33	0.525737	0.213274	-0.257173	-0.197032	-0.478468	-0.38352	-0.41792	-0.359505
D3ZSB7	Ribosomal protein S6 kinase OS=Rattus norvegicus OX=10116 GN=Rps6ka4 PE=1 SV=2 - [D3ZSB7_RAT]	1	2	0.215756	0.297287	0.339765	0.0184223	0.368296	0.398565	0.603587	0.549839
Q5XI42	Aldehyde dehydrogenase family 3 member B1 OS=Rattus norvegicus OX=10116 GN=Aldh3b1 PE=2 SV=1 - [AL3B1_RAT]	3	6	0.26866	0.4603	0.692441	-0.153448	0.428281	0.644762	0.615678	0.611873
F1M965	Choline transporter-like protein 3 OS=Rattus norvegicus OX=10116 GN=Slc44a3 PE=3 SV=3 - [F1M965_RAT]	1	1	-1.55446	-2.66488	-2.9435	-2.10449	-1.77553	-1.71812	-2.37827	-2.23214
A0A0G2JZL9	Endothelial cell-selective adhesion molecule OS=Rattus norvegicus OX=10116 GN=Esam PE=1 SV=1 - [A0A0G2JZL9_RAT]	3	6	0.48543	0.469097	0.602926	0.467105	0.314103	0.157112	0.274584	0.400255
G3V8G9	Neurogenic locus notch homolog protein 2 OS=Rattus norvegicus OX=10116 GN=Notch2 PE=1 SV=1 - [G3V8G9_RAT]	5	14	0.207385	0.176088	0.292781	0.486938	0.364027	0.38913	0.251147	0.346689
Q66HA1	Mitogen-activated protein kinase kinase kinase 11 OS=Rattus norvegicus OX=10116 GN=Map3k11 PE=1 SV=1 - [M3K11_RAT]	1	1	0.332905	0.45252	0.665843	-0.0883973	0.768954	1.22348	1.14891	0.777309
Q14TE9	DNA topoisomerase 2 OS=Rattus norvegicus OX=10116 GN=Top2b PE=2 SV=1 - [Q14TE9_RAT]	21	91	-0.478727	-0.228353	0.136656	-0.227393	-0.399738	-0.305899	-0.395749	-0.262002
A0A096MK61	Cartilage-associated protein-like 1 OS=Rattus norvegicus OX=10116 GN=Crtapl1 PE=1 SV=1 - [A0A096MK61_RAT]	7	10	0.701645	0.602564	0.85008	0.37285	0.759033	0.967621	0.886375	0.965964
P04157	Receptor-type tyrosine-protein phosphatase C OS=Rattus norvegicus OX=10116 GN=Ptprc PE=1 SV=2 - [PTPRC_RAT]	11	24	0.0473832	-0.0240905	0.344701	-0.0523464	0.267178	0.598117	0.61831	0.633545
D4A108	Intersex-like (Drosophila) (Predicted) OS=Rattus norvegicus OX=10116 GN=Med29 PE=1 SV=1 - [D4A108_RAT]	2	4	0.396102	-0.0802936	-0.688089	0.102356	0.397999	0.581348	0.256267	0.444555
P08033	Gap junction beta-1 protein OS=Rattus norvegicus OX=10116 GN=Gjb1 PE=1 SV=1 - [CXB1_RAT]	6	17	-0.215711	-0.0218768	0.129809	0.0669178	0.405488	0.687793	0.703453	0.611222
F1LN59	Eukaryotic translation initiation factor 4, gamma 2 OS=Rattus norvegicus OX=10116 GN=Eif4g2 PE=1 SV=2 - [F1LN59_RAT]	10	24	0.531306	0.239645	0.24081	0.229035	0.166776	0.22728	0.215866	0.246781
B0BNG3	Lectin, mannose-binding 2 OS=Rattus norvegicus OX=10116 GN=Lman2 PE=1 SV=1 - [B0BNG3_RAT]	13	41	0.249955	0.364598	0.368945	0.261745	0.269612	0.441173	0.333407	0.338479
A0A0G2JXM2	Cyclin-T1-like OS=Rattus norvegicus OX=10116 GN=LOC103692976 PE=4 SV=1 - [A0A0G2JXM2_RAT]	4	5	-0.40113	-0.443364	-0.861732	-0.635043	-0.786392	-1.06945	-0.684159	-1.07148
Q5FWU0	WAS protein family, member 2 OS=Rattus norvegicus OX=10116 GN=Wasf2 PE=2 SV=1 - [Q5FWU0_RAT]	6	13	0.135404	-0.230795	-0.267325	-0.238525	-0.275194	-0.364873	-0.265743	-0.136595
P20673	Argininosuccinate lyase OS=Rattus norvegicus OX=10116 GN=Asl PE=2 SV=1 - [ARLY_RAT]	10	22	0.600188	0.615262	0.313666	-0.506511	-0.745622	-0.654997	-0.607051	-0.599398
M0R3T0	Oxidoreductase-like domain-containing 1 OS=Rattus norvegicus OX=10116 GN=Oxld1 PE=1 SV=2 - [M0R3T0_RAT]	1	3	-0.31376	-0.570679	-1.27324	-0.454349	-0.587145	-0.627799	-0.679553	-0.954381
Q64550	UDP-glucuronosyltransferase 1-1 OS=Rattus norvegicus OX=10116 GN=Ugt1a1 PE=1 SV=1 - [UD11_RAT]	2	42	-1.06197	-0.681372	-0.306901	-0.845359	-0.839636	-0.769084	-0.801749	-0.89859
Q5HZB6	CLK4-associating serine/arginine rich protein OS=Rattus norvegicus OX=10116 GN=Clasrp PE=1 SV=2 - [CLASR_RAT]	2	3	-0.163521	-0.156247	-0.211709	0.27928	0.419629	0.228418	0.150247	0.317
D4A264	Zinc-binding alcohol dehydrogenase, domain-containing 2 OS=Rattus norvegicus OX=10116 GN=Zadh2 PE=1 SV=2 - [D4A264_RAT]	11	29	-0.0873673	0.0829627	0.0216656	-0.218508	-0.319996	-0.228116	-0.353941	-0.320114
P62749	Hippocalcin-like protein 1 OS=Rattus norvegicus OX=10116 GN=Hpcal1 PE=1 SV=2 - [HPCL1_RAT]	7	20	0.404316	0.166427	0.444078	0.341563	0.362839	0.421027	0.420937	0.43883
Q2PQA9	Kinesin-1 heavy chain OS=Rattus norvegicus OX=10116 GN=Kif5b PE=1 SV=1 - [KINH_RAT]	22	47	-0.107303	0.0519075	-0.221945	-0.144223	-0.181364	-0.166095	-0.152092	-0.192975
A0A0G2K1U4	Ubiquitin protein ligase E3 component n-recognin 2 OS=Rattus norvegicus OX=10116 GN=Ubr2 PE=1 SV=1 - [A0A0G2K1U4_RAT]	1	1	0.344604	0.301001	-0.684409	-0.00968205	-0.465977	-1.04585	-1.39597	-1.22543
D3ZSY1	Poly(A) RNA polymerase D7, non-canonical OS=Rattus norvegicus OX=10116 GN=Tent4a PE=4 SV=1 - [D3ZSY1_RAT]	1	1	-0.450772	-0.259229	0.170691	-0.0899032	-0.152876	-0.174145	-0.308893	-0.239958
F1M9W4	Protocadherin gamma subfamily B, 7 OS=Rattus norvegicus OX=10116 GN=Pcdhgb7 PE=4 SV=1 - [F1M9W4_RAT]	1	2	-0.0997834	-0.0419447	0.167788	0.371938	0.216803	0.235642	0.268499	0.506489
P67779	Prohibitin OS=Rattus norvegicus OX=10116 GN=Phb PE=1 SV=1 - [PHB_RAT]	13	105	-0.0822979	0.0507742	0.11749	-0.53283	-0.232714	-0.185565	-0.224379	-0.22251
A0A0G2K189	Secernin 3 OS=Rattus norvegicus OX=10116 GN=Scrn3 PE=1 SV=1 - [A0A0G2K189_RAT]	3	5	0.382064	0.100964	-0.0311349	-0.198507	-0.440174	-0.194133	-0.2205	-0.314365
A0A0G2K0I3	Nicotinamide phosphoribosyltransferase OS=Rattus norvegicus OX=10116 GN=Nampt PE=1 SV=1 - [A0A0G2K0I3_RAT]	9	15	0.211859	0.26167	0.026717	-0.321664	-0.416407	-0.4224	-0.374433	-0.413893
P04897	Guanine nucleotide-binding protein G(i) subunit alpha-2 OS=Rattus norvegicus OX=10116 GN=Gnai2 PE=1 SV=3 - [GNAI2_RAT]	7	64	0.121761	0.458204	0.656597	0.254163	0.320635	0.563342	0.567765	0.579771
A0A0G2JY11	Tetraspanin OS=Rattus norvegicus OX=10116 GN=Tspan9 PE=1 SV=1 - [A0A0G2JY11_RAT]	1	10	0.217241	0.294679	0.377794	0.123161	0.556077	1.15451	1.10735	0.921294
B0BN18	Prefoldin subunit 2 OS=Rattus norvegicus OX=10116 GN=Pfdn2 PE=2 SV=1 - [PFD2_RAT]	7	23	0.0782254	-0.0296325	-0.311744	-0.052298	-0.390741	-0.43881	-0.48269	-0.505747
Q5BJX1	39S ribosomal protein L41, mitochondrial OS=Rattus norvegicus OX=10116 GN=Mrpl41 PE=1 SV=1 - [RM41_RAT]	6	15	0.358056	0.235081	-0.209184	-0.123073	-0.387981	-0.590291	-0.655206	-0.666458
E9PSP1	Phospholipid transfer protein OS=Rattus norvegicus OX=10116 GN=Pltp PE=1 SV=1 - [E9PSP1_RAT]	1	2	0.299589	0.176307	0.430025	-0.0165965	0.364198	0.689156	0.844393	0.728158
Q5BJY9	Keratin, type I cytoskeletal 18 OS=Rattus norvegicus OX=10116 GN=Krt18 PE=1 SV=3 - [K1C18_RAT]	39	918	0.536689	0.292173	0.397332	0.30387	0.584853	0.779928	0.799783	0.754374
A0A0G2JTW9	Beta-globin OS=Rattus norvegicus OX=10116 GN=Hbb-b1 PE=1 SV=1 - [A0A0G2JTW9_RAT]	2	570	1.08152	0.043776	0.0911378	0.382951	0.534703	0.618967	0.537649	0.55902
D3ZXT2	Stromal antigen 2 OS=Rattus norvegicus OX=10116 GN=Stag2 PE=1 SV=1 - [D3ZXT2_RAT]	7	22	0.0401176	0.0481638	0.371455	0.203883	0.357007	0.447391	0.626185	0.566378
Q5VLR5	BWK4 OS=Rattus norvegicus OX=10116 GN=Erp44 PE=1 SV=1 - [Q5VLR5_RAT]	11	46	0.750853	0.607345	0.658494	0.830415	0.627766	0.520574	0.375761	0.452689
B1WC11	Acyl-CoA synthetase short-chain family member 2 OS=Rattus norvegicus OX=10116 GN=Acss2 PE=2 SV=1 - [B1WC11_RAT]	2	2	0.038856	0.583837	0.299614	-0.415264	-0.740681	-0.775871	-0.451015	-0.832711
A0A0H2UHM4	Outer dense fiber protein 2 OS=Rattus norvegicus OX=10116 GN=Odf2 PE=1 SV=1 - [A0A0H2UHM4_RAT]	7	12	0.100826	0.0320523	0.265026	0.296975	0.437686	0.413147	0.455605	0.522144
F1LST1	Fibronectin OS=Rattus norvegicus OX=10116 GN=Fn1 PE=1 SV=3 - [F1LST1_RAT]	4	2853	0.15217	0.287975	0.553876	0.64782	0.37926	0.416577	0.319766	0.469782
A0A0G2K911	NSFL1 cofactor p47 OS=Rattus norvegicus OX=10116 GN=Nsfl1c PE=1 SV=1 - [A0A0G2K911_RAT]	11	65	0.346597	-0.0382032	-0.461872	-0.26223	-0.403478	-0.527907	-0.473872	-0.458845
D3ZRE7	SWAP complex protein (Predicted), isoform CRA_b OS=Rattus norvegicus OX=10116 GN=Swap70 PE=1 SV=1 - [D3ZRE7_RAT]	12	21	-0.19593	-0.23355	-0.534789	-0.310882	-0.471873	-0.53048	-0.536777	-0.593556
Q5EB56	Protein MAK16 homolog OS=Rattus norvegicus OX=10116 GN=Mak16 PE=1 SV=1 - [Q5EB56_RAT]	1	2	-3.19642	-1.49783	-0.572623	-1.13769	-0.677537	-0.405509	-0.465373	-0.684463
D4AB33	Paternally-expressed 3 OS=Rattus norvegicus OX=10116 GN=Peg3 PE=1 SV=2 - [D4AB33_RAT]	5	6	-0.890377	-0.370675	-0.174186	-0.313024	-0.313289	-0.22001	-0.458825	-0.448073
Q6MGC4	H2-K region expressed gene 2, rat orthologue OS=Rattus norvegicus OX=10116 GN=Pfdn6 PE=1 SV=1 - [Q6MGC4_RAT]	9	23	0.208468	-0.0852901	-0.551785	-0.235528	-0.435956	-0.587968	-0.520362	-0.548792
Q9ESM0	Inositol hexakisphosphate kinase 1 OS=Rattus norvegicus OX=10116 GN=Ip6k1 PE=2 SV=1 - [IP6K1_RAT]	2	5	0.063685	-0.0394418	-0.0540207	-0.111922	-0.398426	-0.38007	-0.214399	-0.248797
A0A0G2JZ04	Zinc finger CCHC-type containing 11 OS=Rattus norvegicus OX=10116 GN=Tut4 PE=1 SV=1 - [A0A0G2JZ04_RAT]	4	5	-0.506439	-0.331486	-0.192541	-0.0134063	-0.411555	-0.797354	-1.09971	-0.954046
A0A0G2K747	Single-stranded DNA binding protein 1, isoform CRA_b OS=Rattus norvegicus OX=10116 GN=Ssbp1 PE=1 SV=1 - [A0A0G2K747_RAT]	8	30	-0.0900914	-0.257312	-0.19384	-0.171223	-0.490182	-0.583706	-0.685608	-0.546522
P62501	TSC22 domain family protein 1 OS=Rattus norvegicus OX=10116 GN=Tsc22d1 PE=2 SV=1 - [T22D1_RAT]	3	7	-0.112191	-0.100949	-0.654878	-0.2319	-0.318694	-0.656783	-0.612607	-0.690809
B2RZD0	Mitochondrial ribosomal protein 63 OS=Rattus norvegicus OX=10116 GN=Mrpl57 PE=1 SV=1 - [B2RZD0_RAT]	3	7	0.483575	0.249904	-0.358908	-0.261794	-0.409647	-0.445377	-0.545476	-0.585984
D3ZTT7	Sad1 and UNC84 domain-containing 2 OS=Rattus norvegicus OX=10116 GN=Sun2 PE=1 SV=1 - [D3ZTT7_RAT]	15	45	0.071859	0.0126599	0.589634	0.06643	0.463579	0.763199	0.868048	0.787271
B1H269	DEAD-box helicase 27 OS=Rattus norvegicus OX=10116 GN=Ddx27 PE=1 SV=1 - [B1H269_RAT]	6	12	-0.653491	-0.694079	-0.563822	-0.416646	-0.124728	-0.0773309	-0.189443	-0.178529
Q6PDV8	60S ribosomal protein L22 OS=Rattus norvegicus OX=10116 GN=LOC100360057 PE=1 SV=1 - [Q6PDV8_RAT]	3	18	-0.346131	-0.278823	-0.0359051	-0.0986837	-0.223642	-0.272305	-0.367696	-0.534881
Q5RK27	Solute carrier family 12 member 7 OS=Rattus norvegicus OX=10116 GN=Slc12a7 PE=2 SV=2 - [S12A7_RAT]	3	3	0.478579	0.44603	0.588914	1.20612	0.715752	0.68668	0.734964	0.904133
D3ZZ25	Zinc finger protein 280C OS=Rattus norvegicus OX=10116 GN=Zfp280c PE=1 SV=3 - [D3ZZ25_RAT]	1	1	-0.204382	-0.291193	0.256624	0.888058	0.570343	0.396434	0.517126	0.834999
M0R402	Thioredoxin-related transmembrane protein 3 OS=Rattus norvegicus OX=10116 GN=Tmx3 PE=1 SV=2 - [M0R402_RAT]	5	17	0.26938	0.27849	0.739882	0.170816	0.350719	0.874083	0.817659	0.620231
F1LY70	Baculoviral IAP repeat-containing 6 OS=Rattus norvegicus OX=10116 GN=Birc6 PE=1 SV=3 - [F1LY70_RAT]	3	3	-0.071194	0.0485759	-0.364021	-0.302698	-0.373552	-0.518057	-0.67164	-0.671814
G3V7S2	Neurofilament medium polypeptide OS=Rattus norvegicus OX=10116 GN=Nefm PE=1 SV=3 - [G3V7S2_RAT]	18	163	-2.09327	-1.58447	-1.26541	-0.881114	-1.02933	-1.26688	-1.19998	-1.24645
B2RYD0	Ube2g2 protein OS=Rattus norvegicus OX=10116 GN=Ube2g2 PE=1 SV=1 - [B2RYD0_RAT]	3	6	1.08567	0.663809	0.979723	0.634083	0.620943	0.778823	0.555226	0.885481
Q62896	BET1 homolog OS=Rattus norvegicus OX=10116 GN=Bet1 PE=1 SV=1 - [BET1_RAT]	1	2	-0.286842	-0.12993	0.349994	0.408346	0.426488	0.626567	0.486656	0.675606
Q6SKG1	Acyl-coenzyme A synthetase ACSM3, mitochondrial OS=Rattus norvegicus OX=10116 GN=Acsm3 PE=2 SV=1 - [ACSM3_RAT]	4	14	-0.710092	-0.908894	-0.741849	-1.04325	-0.772268	-0.660423	-0.544134	-0.763581
D3ZN51	Integrin subunit alpha 9 OS=Rattus norvegicus OX=10116 GN=Itga9 PE=1 SV=3 - [D3ZN51_RAT]	7	14	0.456043	0.371079	0.826185	0.602575	0.210822	0.488334	0.312842	0.56401
Q5U2Y6	Tuftelin-interacting protein 11 OS=Rattus norvegicus OX=10116 GN=Tfip11 PE=1 SV=1 - [TFP11_RAT]	11	21	-0.265272	-0.295569	0.0414016	0.0544679	0.22388	0.260125	0.297155	0.387794
B5DFB0	Leprecan-like 2 (Predicted), isoform CRA_b OS=Rattus norvegicus OX=10116 GN=P3h3 PE=2 SV=1 - [B5DFB0_RAT]	4	14	-0.20356	-0.386338	0.0891733	-0.0734049	0.603125	0.969455	0.859056	0.848342
Q5U367	Procollagen-lysine,2-oxoglutarate 5-dioxygenase 3 OS=Rattus norvegicus OX=10116 GN=Plod3 PE=2 SV=1 - [PLOD3_RAT]	11	27	0.360809	0.485741	0.415045	0.488696	0.533167	0.492068	0.66276	0.680498
P97878	Exocyst complex component 5 OS=Rattus norvegicus OX=10116 GN=Exoc5 PE=1 SV=1 - [EXOC5_RAT]	3	3	0.0098132	0.27569	-0.0217816	-0.00956968	0.412628	0.641952	0.443932	0.556308
D3ZHG3	Protein tyrosine kinase 7 OS=Rattus norvegicus OX=10116 GN=Ptk7 PE=3 SV=3 - [D3ZHG3_RAT]	10	27	-0.158946	-0.146159	0.184213	0.25667	0.224473	0.276357	0.313069	0.334812
G3V9H6	PPFIA-binding protein 2 OS=Rattus norvegicus OX=10116 GN=Ppfibp2 PE=1 SV=1 - [G3V9H6_RAT]	4	12	-0.128571	-0.435407	-0.423355	-0.410393	-0.585214	-0.778559	-0.809574	-0.57499
F1LPQ9	A-kinase anchor protein 2 OS=Rattus norvegicus OX=10116 GN=Akap2 PE=1 SV=2 - [F1LPQ9_RAT]	12	26	-0.575139	-0.18893	-0.295933	-0.173766	-0.405479	-0.643157	-0.638474	-0.660972
E9PTG1	SWI/SNF-related, matrix-associated, actin-dependent regulator of chromatin, subfamily a, member 2 OS=Rattus norvegicus OX=10116 GN=Smarca2 PE=1 SV=1 - [E9PTG1_RAT]	4	10	-0.0211137	0.0802846	-0.290624	-0.209963	-0.386245	-0.606025	-0.360476	-0.479582
D4A5R0	Peptidyl-prolyl cis-trans isomerase OS=Rattus norvegicus OX=10116 GN=Ppih PE=1 SV=2 - [D4A5R0_RAT]	7	20	0.170567	-0.0540676	0.184738	0.553696	0.618995	0.456398	0.50961	0.504871
O35112	CD166 antigen OS=Rattus norvegicus OX=10116 GN=Alcam PE=1 SV=1 - [CD166_RAT]	21	101	0.284526	0.253727	0.428545	0.40838	0.499634	0.586704	0.566457	0.548633
B2RYQ5	Enhancer of rudimentary homolog OS=Rattus norvegicus OX=10116 GN=Erh PE=1 SV=1 - [B2RYQ5_RAT]	6	56	0.0464602	0.0538009	0.357464	0.776925	0.590778	0.60792	0.553526	0.556724
A7BFV9	Epidermal growth factor receptor pathway substrate 15 OS=Rattus norvegicus OX=10116 PE=1 SV=1 - [A7BFV9_RAT]	17	44	0.378039	0.204598	0.350209	0.430163	0.308016	0.219651	0.238724	0.231327
A0A0G2K6Z8	Pleckstrin homology domain-containing A7 OS=Rattus norvegicus OX=10116 GN=Plekha7 PE=1 SV=1 - [A0A0G2K6Z8_RAT]	18	41	-0.116391	-0.263845	0.0438251	0.0936563	0.284447	0.401773	0.383029	0.430624
P47853	Biglycan OS=Rattus norvegicus OX=10116 GN=Bgn PE=1 SV=1 - [PGS1_RAT]	14	85	-0.331922	-0.568423	-0.106818	-0.183214	0.227153	0.486186	0.412035	0.493183
D3ZY39	Ribosomal RNA-processing 1B OS=Rattus norvegicus OX=10116 GN=Rrp1b PE=1 SV=3 - [D3ZY39_RAT]	8	15	0.252212	0.0548866	0.176074	0.458167	0.548438	0.65083	0.48325	0.414787
P08661	Mannose-binding protein C OS=Rattus norvegicus OX=10116 GN=Mbl2 PE=1 SV=2 - [MBL2_RAT]	5	17	-0.0657135	-0.340568	0.0506736	-0.148425	-0.507805	-0.552995	-0.672082	-0.54444
D3ZQN7	Laminin subunit beta 1 OS=Rattus norvegicus OX=10116 GN=Lamb1 PE=1 SV=3 - [D3ZQN7_RAT]	35	132	-0.286254	-0.123044	0.0931607	-0.0885567	0.205917	0.418856	0.383804	0.439004
Q64303	Serine/threonine-protein kinase PAK 2 OS=Rattus norvegicus OX=10116 GN=Pak2 PE=1 SV=1 - [PAK2_RAT]	5	19	-0.193531	-0.126256	-0.541433	-0.207183	-0.248082	-0.331174	-0.33455	-0.413928
B0BNK1	RAB5C, member RAS oncogene family OS=Rattus norvegicus OX=10116 GN=Rab5c PE=1 SV=1 - [B0BNK1_RAT]	4	21	0.121311	0.151128	0.286227	0.058126	0.281819	0.325445	0.273764	0.28616
G3V712	Keratin complex 2, basic, gene 7, isoform CRA_a OS=Rattus norvegicus OX=10116 GN=Krt7 PE=1 SV=1 - [G3V712_RAT]	17	250	0.183668	-0.321421	0.0143991	0.160182	0.536104	0.797441	0.761022	0.697933
G3V996	LETM1 domain-containing 1 OS=Rattus norvegicus OX=10116 GN=Letmd1 PE=1 SV=1 - [G3V996_RAT]	2	3	-0.445522	0.368128	-0.387096	-0.795115	-0.664521	-0.667189	-0.499729	-0.50016
P59215	Guanine nucleotide-binding protein G(o) subunit alpha OS=Rattus norvegicus OX=10116 GN=Gnao1 PE=1 SV=2 - [GNAO_RAT]	1	5	-1.03425	-0.842357	-0.861702	-0.627473	-1.31092	-1.06437	-1.07987	-0.877874
Q8VI65	Beta II spectrin-short isoform (Fragment) OS=Rattus norvegicus OX=10116 PE=2 SV=1 - [Q8VI65_RAT]	1	2	0.0176083	0.18623	0.213591	0.450542	0.525041	0.680071	0.53347	0.40591
P62074	Mitochondrial import inner membrane translocase subunit Tim10 OS=Rattus norvegicus OX=10116 GN=Timm10 PE=3 SV=1 - [TIM10_RAT]	9	34	0.163448	0.228934	-0.0623884	-0.0263171	-0.452925	-0.737602	-0.787388	-0.593789
A0A0U1RRV5	Clustered mitochondria protein homolog OS=Rattus norvegicus OX=10116 GN=Cluh PE=1 SV=1 - [A0A0U1RRV5_RAT]	16	31	-0.28959	-0.0299748	-0.419112	-0.514709	-0.592122	-0.698113	-0.546647	-0.647839
A0A0G2JVE6	Aminopeptidase OS=Rattus norvegicus OX=10116 GN=Anpep PE=1 SV=1 - [A0A0G2JVE6_RAT]	2	131	-0.679967	-0.233711	1.10825	1.21677	0.981	0.963287	0.939672	1.03766
Q62930	Complement component C9 OS=Rattus norvegicus OX=10116 GN=C9 PE=1 SV=1 - [CO9_RAT]	1	2	-0.251088	-0.846225	-0.297018	-0.417405	-0.609501	-0.536152	-0.662084	-0.528444
D3ZAF6	ATP synthase subunit f, mitochondrial OS=Rattus norvegicus OX=10116 GN=Atp5j2 PE=1 SV=1 - [ATPK_RAT]	2	14	-0.636493	-0.163802	-0.297399	-0.884139	-0.863301	-0.722735	-0.854866	-0.660878
A0A0G2JUK2	LSM14A mRNA-processing body assembly factor OS=Rattus norvegicus OX=10116 GN=Lsm14a PE=1 SV=1 - [A0A0G2JUK2_RAT]	5	7	0.139779	0.133393	-0.231889	0.111269	-0.268663	-0.534365	-0.602277	-0.531145
A0A0G2JTY6	G-rich RNA sequence-binding factor 1 OS=Rattus norvegicus OX=10116 GN=Grsf1 PE=1 SV=1 - [A0A0G2JTY6_RAT]	5	13	-0.191136	-0.0238178	-0.328215	0.0633515	-0.112532	-0.319501	-0.35721	-0.507642
D4A6E3	Murinoglobulin-1 OS=Rattus norvegicus OX=10116 GN=Mug1 PE=1 SV=2 - [D4A6E3_RAT]	1	116	-0.18011	-0.449132	-0.0302426	-0.0589527	-0.639759	-1.01578	-1.04523	-0.809712
Q62975	Protein Z-dependent protease inhibitor OS=Rattus norvegicus OX=10116 GN=Serpina10 PE=2 SV=2 - [ZPI_RAT]	1	2	1.37882	1.21289	1.12728	1.08387	0.564253	0.455647	0.464154	0.701319
M0RBK4	Uncharacterized protein OS=Rattus norvegicus OX=10116 PE=1 SV=2 - [M0RBK4_RAT]	1	1	1.04445	1.25062	0.840001	0.426789	0.381401	0.28433	0.212271	0.19637
D4AA31	Prolylcarboxypeptidase OS=Rattus norvegicus OX=10116 GN=Prcp PE=1 SV=1 - [D4AA31_RAT]	2	5	0.274795	0.198085	0.0815871	0.0156882	0.17132	0.465704	0.1307	0.264323
P85968	6-phosphogluconate dehydrogenase, decarboxylating OS=Rattus norvegicus OX=10116 GN=Pgd PE=1 SV=1 - [6PGD_RAT]	11	41	-0.515615	-0.375106	-0.474692	-0.538941	-0.432028	-0.401375	-0.609358	-0.543238
D4A834	Proteoglycan 3 (Predicted) OS=Rattus norvegicus OX=10116 GN=Prg3 PE=4 SV=1 - [D4A834_RAT]	1	2	0.0378287	-0.0818313	-0.0452245	-0.00194178	0.443198	0.681126	0.658347	0.749396
Q4QQV8	Charged multivesicular body protein 5 OS=Rattus norvegicus OX=10116 GN=Chmp5 PE=2 SV=1 - [CHMP5_RAT]	4	10	-0.195155	-0.347861	-0.451097	-0.0536196	-0.306217	-0.543837	-0.535156	-0.64574
P24473	Glutathione S-transferase kappa 1 OS=Rattus norvegicus OX=10116 GN=Gstk1 PE=1 SV=3 - [GSTK1_RAT]	12	53	0.207347	0.125308	0.24162	0.0362327	0.210333	0.306915	0.295774	0.208863
G3V8S2	SHC-transforming protein 1 OS=Rattus norvegicus OX=10116 GN=Shc1 PE=1 SV=1 - [G3V8S2_RAT]	3	5	0.14745	-0.0551257	-0.214824	-0.21865	-0.262015	-0.320238	-0.471518	-0.502045
P50116	Protein S100-A9 OS=Rattus norvegicus OX=10116 GN=S100a9 PE=1 SV=3 - [S10A9_RAT]	6	54	0.405028	-0.391223	0.00710118	0.209724	0.360919	0.510932	0.491507	0.502524
F1LSM3	WD repeat-containing protein 44 OS=Rattus norvegicus OX=10116 GN=Wdr44 PE=1 SV=2 - [F1LSM3_RAT]	5	11	-0.154646	0.155324	-0.20439	-0.175777	-0.323834	-0.612032	-0.46391	-0.41256
Q6P784	Branched-chain-amino-acid aminotransferase OS=Rattus norvegicus OX=10116 GN=Bcat2 PE=2 SV=1 - [Q6P784_RAT]	6	12	0.18031	0.0140694	0.354235	0.10717	0.159648	0.473769	0.522962	0.302302
Q4V8C3	Echinoderm microtubule-associated protein-like 1 OS=Rattus norvegicus OX=10116 GN=Eml1 PE=1 SV=2 - [EMAL1_RAT]	6	11	-0.765151	-0.66776	-0.979302	-1.13781	-0.622256	-0.447659	-0.455327	-0.400976
Q5FVH7	Male-enhanced antigen 1 OS=Rattus norvegicus OX=10116 GN=Mea1 PE=1 SV=1 - [MEA1_RAT]	1	2	0.183416	-0.329397	-0.504243	-0.176875	-0.611639	-1.02332	-0.820329	-0.423045
Q4G069	Regulator of microtubule dynamics protein 1 OS=Rattus norvegicus OX=10116 GN=Rmdn1 PE=2 SV=1 - [RMD1_RAT]	6	17	0.636919	0.646068	0.595681	0.53452	0.293094	0.283288	0.219632	0.290762
A0A0G2K5L2	RCG47744, isoform CRA_c OS=Rattus norvegicus OX=10116 GN=LOC100911440 PE=1 SV=1 - [A0A0G2K5L2_RAT]	9	15	-0.736663	0.079673	-0.21022	-0.75518	-0.714776	-0.697937	-0.718135	-0.744524
Q68FQ6	Similar to RIKEN cDNA 1700011A15 OS=Rattus norvegicus OX=10116 GN=RGD1305207 PE=2 SV=1 - [Q68FQ6_RAT]	2	74	0.789277	0.123343	0.772351	0.868808	0.92535	1.29474	1.4593	1.36254
P56571	ES1 protein homolog, mitochondrial OS=Rattus norvegicus OX=10116 PE=1 SV=2 - [ES1_RAT]	9	45	-0.1492	0.0170426	-0.18557	-0.100281	-0.259417	-0.385522	-0.393112	-0.461585
G3V7A6	Coiled-coil domain-containing protein 174 OS=Rattus norvegicus OX=10116 GN=Ccdc174 PE=1 SV=1 - [G3V7A6_RAT]	1	2	-0.280022	-0.411209	-0.813428	-1.0695	-0.614093	-0.593458	-0.764421	-0.722084
F1M0A6	Tyrosine-protein kinase OS=Rattus norvegicus OX=10116 GN=LOC100909750 PE=3 SV=1 - [F1M0A6_RAT]	1	1	-0.771154	-0.365602	-0.673225	-0.714467	-0.637859	-0.666857	-0.749966	-0.568383
M0R7I0	Importin subunit alpha OS=Rattus norvegicus OX=10116 GN=LOC100359600 PE=3 SV=1 - [M0R7I0_RAT]	6	20	-0.576205	-0.858767	-0.334428	-0.11658	-0.246569	-0.28537	-0.263251	-0.127161
P17178	Sterol 26-hydroxylase, mitochondrial OS=Rattus norvegicus OX=10116 GN=Cyp27a1 PE=1 SV=1 - [CP27A_RAT]	11	26	-0.860479	0.0136436	-0.261492	-0.886031	-0.735893	-0.765734	-0.681441	-0.813318
Q3B8N9	Biphenyl hydrolase-like OS=Rattus norvegicus OX=10116 GN=Bphl PE=1 SV=1 - [Q3B8N9_RAT]	5	9	0.398003	0.0666455	0.715067	0.0190473	0.56003	0.907964	1.01334	0.881555
B2GUY0	Endoplasmic reticulum mannosyl-oligosaccharide 1,2-alpha-mannosidase OS=Rattus norvegicus OX=10116 GN=Man1b1 PE=2 SV=2 - [MA1B1_RAT]	7	13	0.0317629	0.258855	0.504813	-0.305546	0.43497	0.939653	0.856603	1.0048
P35280	Ras-related protein Rab-8A OS=Rattus norvegicus OX=10116 GN=Rab8a PE=1 SV=2 - [RAB8A_RAT]	4	30	0.181541	0.540638	0.446493	0.19074	0.405287	0.28138	0.344681	0.292216
P27213	6-pyruvoyl tetrahydrobiopterin synthase OS=Rattus norvegicus OX=10116 GN=Pts PE=1 SV=1 - [PTPS_RAT]	3	7	0.185252	-0.338709	-0.423302	-0.467082	-0.531458	-0.755894	-0.496618	-0.63236
F1M4Q3	Hemicentin 1 OS=Rattus norvegicus OX=10116 GN=Hmcn1 PE=1 SV=3 - [F1M4Q3_RAT]	26	37	-0.0298737	-0.00145579	0.224875	-0.0781594	0.225031	0.49146	0.531228	0.477663
F1LQ96	Gamma-synuclein OS=Rattus norvegicus OX=10116 GN=Sncg PE=1 SV=1 - [F1LQ96_RAT]	1	4	-1.29841	-1.33116	-1.23534	-1.01351	-1.02481	-1.14989	-1.08806	-0.984698
A0A0G2K1E2	Integrin alpha 5 (Mapped) OS=Rattus norvegicus OX=10116 GN=Itga5 PE=1 SV=1 - [A0A0G2K1E2_RAT]	25	97	0.505807	0.186865	0.515186	0.327747	0.448105	0.521051	0.509634	0.499543
P04166	Cytochrome b5 type B OS=Rattus norvegicus OX=10116 GN=Cyb5b PE=1 SV=2 - [CYB5B_RAT]	4	6	-0.625189	-0.412039	-0.478957	-0.164311	-0.347025	-0.534785	-0.579241	-0.421688
Q4G022	Arsenical pump-driving ATPase (Fragment) OS=Rattus norvegicus OX=10116 GN=Asna1 PE=2 SV=1 - [Q4G022_RAT]	4	8	0.413585	0.181998	0.565041	0.2261	0.426738	0.527261	0.661028	0.569347
Q62806	Zinc finger protein 148 OS=Rattus norvegicus OX=10116 GN=Znf148 PE=1 SV=1 - [ZN148_RAT]	7	12	-0.398326	-0.141026	0.157301	0.0878065	-0.482254	-0.593097	-0.62314	-0.750582
G3V8I4	Syntaxin 4A (Placental), isoform CRA_a OS=Rattus norvegicus OX=10116 GN=Stx4 PE=1 SV=1 - [G3V8I4_RAT]	6	13	0.307303	0.195587	0.554607	0.197399	0.463386	0.661408	0.673245	0.598241
F1LMK6	L-serine dehydratase/L-threonine deaminase OS=Rattus norvegicus OX=10116 GN=Sds PE=1 SV=2 - [F1LMK6_RAT]	1	1	-1.38933	-1.23092	-1.25311	-1.65628	-0.779086	-1.63028	-2.38042	-1.83043
G3V793	Protein CASC3 OS=Rattus norvegicus OX=10116 GN=Casc3 PE=1 SV=2 - [G3V793_RAT]	3	4	-0.0900884	-0.204113	-0.475859	-0.368863	-0.789321	-0.75986	-0.752505	-0.889057
A0A096MJP9	DNA damage-inducible 1 homolog 2 OS=Rattus norvegicus OX=10116 GN=Ddi2 PE=1 SV=1 - [A0A096MJP9_RAT]	8	17	0.300081	-0.105764	-0.333592	-0.243669	-0.389679	-0.394389	-0.346347	-0.460842
P32198	Carnitine O-palmitoyltransferase 1, liver isoform OS=Rattus norvegicus OX=10116 GN=Cpt1a PE=1 SV=2 - [CPT1A_RAT]	9	20	-1.63219	-1.1182	-1.28144	-1.74797	-1.5424	-1.26259	-1.30196	-1.30121
A0JN29	Limb and neural patterns OS=Rattus norvegicus OX=10116 GN=Lnpk PE=1 SV=1 - [A0JN29_RAT]	5	9	0.161521	0.134876	-0.279721	0.101865	0.507206	0.335999	0.367254	0.496172
Q63707	Dihydroorotate dehydrogenase (quinone), mitochondrial OS=Rattus norvegicus OX=10116 GN=Dhodh PE=1 SV=1 - [PYRD_RAT]	14	36	0.699492	0.57086	0.846873	0.338207	0.141544	0.259751	0.223398	0.337847
D3ZW88	FERM and PDZ domain-containing 1 OS=Rattus norvegicus OX=10116 GN=Frmpd1 PE=4 SV=2 - [D3ZW88_RAT]	1	1	0.453313	0.265926	0.731146	0.83572	0.676669	0.618109	0.579296	0.492008
Q07936	Annexin A2 OS=Rattus norvegicus OX=10116 GN=Anxa2 PE=1 SV=2 - [ANXA2_RAT]	28	205	0.279635	0.0452437	0.392846	0.00273961	0.418923	0.761182	0.729057	0.774205
D3ZIT4	Anaphase promoting complex subunit 7 (Predicted) OS=Rattus norvegicus OX=10116 GN=Anapc7 PE=1 SV=1 - [D3ZIT4_RAT]	4	5	0.085916	-0.170726	0.0917229	0.359164	0.140662	0.163973	0.359716	0.322406
D3ZI35	Centrosomal protein 135 OS=Rattus norvegicus OX=10116 GN=Cep135 PE=1 SV=1 - [D3ZI35_RAT]	8	20	-0.14045	-0.225622	0.0484142	0.219151	0.422614	0.452771	0.408565	0.38085
O88754	Epsilon 3 globin OS=Rattus norvegicus OX=10116 GN=Hbg1 PE=2 SV=1 - [O88754_RAT]	7	22	2.00727	1.20326	1.02389	1.80824	1.22571	0.911312	0.923612	0.873407
Q6P762	Alpha-mannosidase OS=Rattus norvegicus OX=10116 GN=Man2b1 PE=1 SV=1 - [Q6P762_RAT]	18	48	0.347871	-0.0474901	0.207585	0.0630907	0.169361	0.389451	0.446101	0.373324
Q4JEI3	Defensin alpha 11 OS=Rattus norvegicus OX=10116 GN=Defa11 PE=2 SV=1 - [Q4JEI3_RAT]	1	15	-0.410306	-0.0553727	0.320855	0.0997132	0.532508	0.523948	0.882707	0.595328
Q9EQS0	Transaldolase OS=Rattus norvegicus OX=10116 GN=Taldo1 PE=1 SV=2 - [TALDO_RAT]	16	46	0.872469	0.165118	0.12249	0.25187	0.203648	0.19696	0.199607	0.209488
O35165	Golgi SNAP receptor complex member 2 OS=Rattus norvegicus OX=10116 GN=Gosr2 PE=1 SV=2 - [GOSR2_RAT]	3	9	0.122793	0.0158808	0.421607	0.236239	0.196524	0.236393	0.309929	0.340191
A0A1L5YJQ7	Histone deacetylase OS=Rattus norvegicus OX=10116 GN=hdac6 PE=2 SV=1 - [A0A1L5YJQ7_RAT]	8	13	-0.0605574	-0.207152	-0.447762	-0.0925888	-0.205631	-0.332026	-0.442882	-0.373294
D3ZLC1	Lamin B2 OS=Rattus norvegicus OX=10116 GN=Lmnb2 PE=1 SV=2 - [D3ZLC1_RAT]	29	205	0.282831	0.141468	0.636586	0.662222	0.461019	0.478886	0.426946	0.50136
G3V9Y3	Tetratricopeptide repeat domain 25 OS=Rattus norvegicus OX=10116 GN=Ttc25 PE=1 SV=1 - [G3V9Y3_RAT]	2	5	0.430363	0.0355202	0.251293	0.384548	1.13041	1.45636	1.47264	1.10441
D3ZHA1	Beta-1,4-glucuronyltransferase 1 OS=Rattus norvegicus OX=10116 GN=B4gat1 PE=1 SV=1 - [D3ZHA1_RAT]	2	4	0.217639	0.223121	0.501621	0.360236	0.576658	0.618773	0.480462	0.479016
Q66H31	Hypothetical LOC287798, isoform CRA_a OS=Rattus norvegicus OX=10116 GN=MGC95210 PE=2 SV=1 - [Q66H31_RAT]	2	2	-1.01925	-0.731182	-0.997095	-1.05475	-0.84648	-0.843739	-0.853895	-1.35581
Q9R1T1	Barrier-to-autointegration factor OS=Rattus norvegicus OX=10116 GN=Banf1 PE=1 SV=1 - [BAF_RAT]	6	85	0.559237	0.286967	1.01858	0.945483	0.501963	0.448262	0.347445	0.448071
Q4V892	Single Ig IL-1-related receptor OS=Rattus norvegicus OX=10116 GN=Sigirr PE=2 SV=1 - [SIGIR_RAT]	7	10	0.413583	0.306528	0.625905	0.0218825	0.132446	0.51063	0.653295	0.573117
D3ZTP0	10-formyltetrahydrofolate dehydrogenase OS=Rattus norvegicus OX=10116 GN=Aldh1l2 PE=1 SV=3 - [D3ZTP0_RAT]	20	80	-0.734461	-0.568676	-0.436615	-0.15329	-0.263025	-0.278495	-0.333873	-0.260556
Q6MG61	Chloride intracellular channel protein 1 OS=Rattus norvegicus OX=10116 GN=Clic1 PE=1 SV=1 - [CLIC1_RAT]	4	14	0.628257	0.01008	0.157044	0.400029	0.318605	0.375647	0.407162	0.435356
Q78EJ9	Calpain-8 OS=Rattus norvegicus OX=10116 GN=Capn8 PE=2 SV=1 - [CAN8_RAT]	1	2	-0.928258	-1.09532	-1.00178	-0.849564	-0.703044	-0.626632	-0.471291	-0.364496
F1M2J2	Ankyrin repeat and sterile alpha motif domain-containing protein 1B OS=Rattus norvegicus OX=10116 GN=Anks1b PE=1 SV=3 - [F1M2J2_RAT]	1	2	-0.00965261	-0.626796	-0.756967	-0.954297	-1.03005	-1.56715	-1.64502	-1.36826
M0R3Z8	RCG28930, isoform CRA_b OS=Rattus norvegicus OX=10116 GN=Rbm15 PE=1 SV=2 - [M0R3Z8_RAT]	14	34	-0.281733	-0.0530034	-0.192297	-0.0955188	0.171583	0.143449	0.0967734	0.132143
P36972	Adenine phosphoribosyltransferase OS=Rattus norvegicus OX=10116 GN=Aprt PE=1 SV=1 - [APT_RAT]	6	14	0.822087	0.144848	0.569014	0.48273	0.390979	0.473839	0.365324	0.42956
D3ZSU6	Ankyrin repeat domain 11 OS=Rattus norvegicus OX=10116 GN=Ankrd11 PE=1 SV=3 - [D3ZSU6_RAT]	2	3	-1.16773	-0.545561	-0.84303	-0.479356	-0.744484	-0.818382	-0.563606	-0.821189
Q7TS57	Syntaxin 2D OS=Rattus norvegicus OX=10116 GN=Stx2 PE=1 SV=1 - [Q7TS57_RAT]	2	3	0.36432	0.409056	0.361721	0.348182	0.68938	0.703381	0.532502	0.366422
Q6S395	Plectin OS=Rattus norvegicus OX=10116 GN=Plec PE=1 SV=1 - [Q6S395_RAT]	193	633	-0.375648	0.171875	0.219504	-0.147303	0.318949	0.597806	0.597349	0.616725
H2BF30	Fatty acid desaturase 1 OS=Rattus norvegicus OX=10116 GN=Fads1 PE=2 SV=1 - [H2BF30_RAT]	3	4	-1.36616	-1.11042	-0.859644	-1.44015	-1.09469	-0.985569	-0.853176	-0.683621
O54953	Stearoyl-CoA desaturase 2 (Fragment) OS=Rattus norvegicus OX=10116 PE=2 SV=1 - [O54953_RAT]	3	4	0.897945	1.65518	1.21959	0.613663	1.42276	1.6842	1.54194	1.57501
Q3MHT7	Klhl13 protein (Fragment) OS=Rattus norvegicus OX=10116 GN=Klhl13 PE=2 SV=1 - [Q3MHT7_RAT]	1	1	-2.57229	-1.83269	-0.98121	-1.62627	-1.26159	-0.98715	-0.953598	-0.811535
P04937	Fibronectin OS=Rattus norvegicus OX=10116 GN=Fn1 PE=1 SV=2 - [FINC_RAT]	3	2888	0.613107	0.35695	0.891671	1.02766	0.710291	0.677662	0.523198	0.631626
A0A0G2JUS7	Transmembrane protein 11, mitochondrial OS=Rattus norvegicus OX=10116 GN=Tmem11 PE=1 SV=1 - [A0A0G2JUS7_RAT]	2	3	-0.543145	0.0448742	-0.219752	-0.597341	-0.383802	-0.381531	-0.446255	-0.498056
M0RD20	Calpain small subunit 1-like OS=Rattus norvegicus OX=10116 GN=Capns1 PE=1 SV=1 - [M0RD20_RAT]	5	15	0.3661	0.0151003	0.0794137	-0.00524678	0.169367	0.501181	0.572268	0.46688
Q5QD51	A-kinase anchor protein 12 OS=Rattus norvegicus OX=10116 GN=Akap12 PE=1 SV=1 - [AKA12_RAT]	23	60	-1.31804	-1.26904	-1.03495	-0.67627	-0.86533	-0.929635	-0.787593	-0.886771
P50123	Glutamyl aminopeptidase OS=Rattus norvegicus OX=10116 GN=Enpep PE=1 SV=2 - [AMPE_RAT]	15	35	0.545564	0.418797	0.826568	0.128337	0.197095	0.554186	0.630932	0.562076
Q91ZN1	Coronin-1A OS=Rattus norvegicus OX=10116 GN=Coro1a PE=1 SV=3 - [COR1A_RAT]	10	34	0.0660485	-0.267029	-0.266382	0.0338654	0.228975	0.302804	0.313882	0.320508
O70257	Syntaxin-7 OS=Rattus norvegicus OX=10116 GN=Stx7 PE=1 SV=4 - [STX7_RAT]	6	36	0.178531	0.0845844	0.110391	0.298547	0.323447	0.499056	0.46909	0.254143
F1LRB8	S-adenosylmethionine synthase OS=Rattus norvegicus OX=10116 GN=Mat2a PE=1 SV=2 - [F1LRB8_RAT]	8	24	-0.1322	-0.401703	-0.477648	-0.210653	-0.217049	-0.275879	-0.362107	-0.219901
A0A0G2K849	TATA-box binding protein associated factor 4 OS=Rattus norvegicus OX=10116 GN=Taf4 PE=1 SV=1 - [A0A0G2K849_RAT]	6	8	-0.242311	-0.326909	-0.0381437	0.228296	0.407835	0.199697	0.299164	0.21123
A0A0G2K3Y9	Megakaryoblastic leukemia (Translocation) 1 (Predicted) OS=Rattus norvegicus OX=10116 GN=Mkl1 PE=1 SV=1 - [A0A0G2K3Y9_RAT]	2	2	-0.383752	-0.955689	-0.97703	-0.854009	-0.886225	-0.898805	-0.396497	-0.205431
P00388	NADPH--cytochrome P450 reductase OS=Rattus norvegicus OX=10116 GN=Por PE=1 SV=3 - [NCPR_RAT]	15	44	-0.57904	-0.325896	-0.176832	-0.589358	-0.630722	-0.446723	-0.406317	-0.549617
A0A1B0GWS3	Cytoplasmic linker-associated protein 1 (Fragment) OS=Rattus norvegicus OX=10116 GN=Clasp1 PE=1 SV=1 - [A0A1B0GWS3_RAT]	2	5	-0.927137	-0.784589	-0.365603	-0.306386	-0.665275	-0.626755	-0.531233	-0.273086
D3ZI68	PRP31 pre-mRNA processing factor 31 homolog (Yeast) (Predicted) OS=Rattus norvegicus OX=10116 GN=Prpf31 PE=1 SV=1 - [D3ZI68_RAT]	6	9	-0.145789	0.136983	-0.0109902	0.0741832	0.393972	0.265973	0.380134	0.379804
P86182	Coiled-coil domain-containing protein 22 OS=Rattus norvegicus OX=10116 GN=Ccdc22 PE=1 SV=2 - [CCD22_RAT]	5	6	0.376959	0.0859429	0.0375447	0.2192	0.264858	0.17101	0.212973	0.204247
Q925F0	Small muscular protein OS=Rattus norvegicus OX=10116 GN=Smpx PE=1 SV=1 - [SMPX_RAT]	1	3	-3.38984		-0.0257638		-2.86205	-3.30875	-3.56959	-3.21394
Q68FX1	Mannose-6-phosphate isomerase OS=Rattus norvegicus OX=10116 GN=Mpi PE=2 SV=1 - [MPI_RAT]	2	5	-0.607831	-0.357305	-1.91963	-1.2472	-0.810447	-0.472478	-0.326434	-0.893294
Q04970	GTPase NRas OS=Rattus norvegicus OX=10116 GN=Nras PE=1 SV=1 - [RASN_RAT]	1	14	0.436063	0.332427	0.750762	0.411781	0.233556	0.255484	0.107566	0.263058
Q9R1T3	Cathepsin Z OS=Rattus norvegicus OX=10116 GN=Ctsz PE=1 SV=2 - [CATZ_RAT]	5	29	0.278443	0.0438977	0.243046	0.320203	0.310296	0.197322	0.254429	0.232511
A0A0G2JXZ3	Transcriptional regulator ATRX OS=Rattus norvegicus OX=10116 GN=Atrx PE=1 SV=1 - [A0A0G2JXZ3_RAT]	14	23	-0.72762	-0.565706	-0.20282	-0.108519	-0.457836	-0.492366	-0.549298	-0.539476
P97519	Hydroxymethylglutaryl-CoA lyase, mitochondrial OS=Rattus norvegicus OX=10116 GN=Hmgcl PE=2 SV=1 - [HMGCL_RAT]	15	51	0.269617	0.0159755	0.173204	-0.311944	-0.366303	-0.176694	-0.200195	-0.226396
A0A0G2JY68	Ribosomal L1 domain-containing 1-like 1 OS=Rattus norvegicus OX=10116 GN=Rsl1d1l1 PE=1 SV=1 - [A0A0G2JY68_RAT]	8	22	-0.772395	-0.409318	-0.532165	-0.308367	-0.202549	-0.295308	-0.343427	-0.305374
Q5XI44	X-ray repair complementing defective repair in Chinese hamster cells 4 OS=Rattus norvegicus OX=10116 GN=Xrcc4 PE=1 SV=1 - [Q5XI44_RAT]	2	4	0.406168	-0.0396918	0.231844	0.267187	0.103217	0.177682	0.213304	0.373804
Q6P7Q6	Galectin OS=Rattus norvegicus OX=10116 GN=Lgals9 PE=1 SV=1 - [Q6P7Q6_RAT]	7	62	0.471755	0.183629	0.764125	0.354218	0.605646	0.927844	0.858576	0.767072
P04694	Tyrosine aminotransferase OS=Rattus norvegicus OX=10116 GN=Tat PE=1 SV=1 - [ATTY_RAT]	2	2	-0.440398	-0.179626	0.0532874	0.00471937	-0.344817	-0.90946	-0.846199	-0.648638
B2RZ79	Iron-sulfur cluster assembly enzyme OS=Rattus norvegicus OX=10116 GN=Iscu PE=1 SV=1 - [B2RZ79_RAT]	6	20	0.017293	-0.0468057	-0.375837	-0.132858	-0.630982	-0.706656	-0.847597	-0.697464
Q66HA7	Core-binding factor subunit beta OS=Rattus norvegicus OX=10116 GN=Cbfb PE=1 SV=1 - [Q66HA7_RAT]	1	1	0.0833393	-0.256362	0.210006	0.204345	0.277371	0.334446	0.393265	0.512138
Q498M6	Neuroepithelial cell-transforming 1 OS=Rattus norvegicus OX=10116 GN=Net1 PE=2 SV=1 - [Q498M6_RAT]	1	1	-1.81008	-1.34135	-1.01929	-1.13419	-0.816968	-0.588927	-0.600834	-0.712758
P09875	UDP-glucuronosyltransferase 2B1 OS=Rattus norvegicus OX=10116 GN=Ugt2b1 PE=2 SV=1 - [UD2B1_RAT]	5	26	-2.47814	-2.27872	-2.09341	-2.19416	-1.38994	-0.995911	-0.958094	-0.954713
G3V9G5	RCG24674, isoform CRA_b OS=Rattus norvegicus OX=10116 GN=Synm PE=1 SV=2 - [G3V9G5_RAT]	19	34	-1.1393	-0.815051	-0.812642	-0.809546	-0.796952	-1.10207	-1.16272	-1.05172
G3V8V6	O-acetyl-ADP-ribose deacetylase MACROD1 OS=Rattus norvegicus OX=10116 GN=Macrod1 PE=1 SV=3 - [G3V8V6_RAT]	5	13	-0.664047	-0.0405452	-0.483716	-0.420697	-0.506429	-0.632136	-0.658398	-0.638836
Q68FR7	Protein LTV1 homolog OS=Rattus norvegicus OX=10116 GN=Ltv1 PE=2 SV=1 - [LTV1_RAT]	3	7	-0.455708	-0.405716	-0.787424	-0.0163053	-0.45656	-0.875891	-1.13726	-0.759695
Q8K4Y7	Soluble calcium-activated nucleotidase 1 OS=Rattus norvegicus OX=10116 GN=Cant1 PE=1 SV=1 - [CANT1_RAT]	1	1	0.527568	0.797705	0.529103	0.301055	0.335806	0.568993	0.488816	0.644047
Q6AXQ0	SUMO-activating enzyme subunit 1 OS=Rattus norvegicus OX=10116 GN=Sae1 PE=2 SV=1 - [SAE1_RAT]	7	11	0.136382	-0.161098	-0.422325	-0.19582	-0.0619772	-0.186541	-0.212914	-0.240477
D3ZA45	Autophagy-related protein 13 OS=Rattus norvegicus OX=10116 GN=Atg13 PE=1 SV=2 - [D3ZA45_RAT]	2	2	0.0251331	0.442948	0.937853	0.467317	0.816592	0.966442	0.685135	0.599966
D3ZTC4	Coiled-coil domain-containing 88B OS=Rattus norvegicus OX=10116 GN=Ccdc88b PE=1 SV=2 - [D3ZTC4_RAT]	12	16	0.500755	0.292187	0.285971	0.38529	0.5161	0.589361	0.605095	0.601383
D4ABN8	5'-3' exoribonuclease 1 OS=Rattus norvegicus OX=10116 GN=Xrn1 PE=1 SV=2 - [D4ABN8_RAT]	2	5	-0.446434	-0.362357	-0.216002	0.248379	-0.358239	-0.793156	-0.607961	-0.625559
P50430	Arylsulfatase B OS=Rattus norvegicus OX=10116 GN=Arsb PE=2 SV=2 - [ARSB_RAT]	10	19	0.347808	-0.100005	0.23108	0.130389	0.202571	0.326641	0.332969	0.338531
P38656	Lupus La protein homolog OS=Rattus norvegicus OX=10116 GN=Ssb PE=1 SV=1 - [LA_RAT]	13	30	-0.220315	-0.00979371	-0.371126	-0.0714591	-0.159738	-0.34747	-0.397007	-0.332598
Q3MID3	ADP-ribosylation factor GTPase-activating protein 2 OS=Rattus norvegicus OX=10116 GN=Arfgap2 PE=1 SV=1 - [ARFG2_RAT]	14	29	-0.133367	-0.162459	-0.367506	-0.225508	-0.437348	-0.535873	-0.667101	-0.454082
O88656	Actin-related protein 2/3 complex subunit 1B OS=Rattus norvegicus OX=10116 GN=Arpc1b PE=1 SV=3 - [ARC1B_RAT]	6	22	0.0233677	-0.0282711	0.0489154	0.0704015	0.167401	0.303018	0.258777	0.218409
B2RYS3	LOC686999 protein OS=Rattus norvegicus OX=10116 GN=Mphosph6 PE=1 SV=1 - [B2RYS3_RAT]	5	10	-0.474772	-0.50798	-0.572095	-0.0789069	-0.19222	-0.41993	-0.51327	-0.495791
Q6TXF0	LRRGT00049 OS=Rattus norvegicus OX=10116 PE=2 SV=1 - [Q6TXF0_RAT]	1	2	-1.93671		0.311745		-2.30347	-2.00651	-1.87131	-1.94724
Q03248	Beta-ureidopropionase OS=Rattus norvegicus OX=10116 GN=Upb1 PE=1 SV=1 - [BUP1_RAT]	9	29	-0.104116	-0.541902	-0.46358	-0.697004	-0.457927	-0.213659	-0.20113	-0.204933
D3ZN63	WD repeat and HMG-box DNA binding protein 1 (Predicted) OS=Rattus norvegicus OX=10116 GN=Wdhd1 PE=4 SV=1 - [D3ZN63_RAT]	1	2	0.766792	0.205695	0.152007	0.750461	0.857245	0.711454	0.743228	0.614693
B0BMW2	3-hydroxyacyl-CoA dehydrogenase type-2 OS=Rattus norvegicus OX=10116 GN=Hsd17b10 PE=1 SV=1 - [B0BMW2_RAT]	12	52	-0.218233	0.196124	-0.213593	-0.631657	-0.589288	-0.423794	-0.490509	-0.428526
Q5U2N1	Negative elongation factor complex member A OS=Rattus norvegicus OX=10116 GN=Nelfa PE=1 SV=1 - [Q5U2N1_RAT]	5	11	-0.082394	-0.335953	-0.0767218	0.0483431	-0.325915	-0.287433	-0.386341	-0.45085
E9PT74	Palmitoyltransferase OS=Rattus norvegicus OX=10116 GN=Zdhhc20 PE=3 SV=1 - [E9PT74_RAT]	1	2	0.23891	0.347542	0.25962	0.184174	0.186768	0.360445	0.401922	0.26811
A0A0G2KB92	Serine/threonine-protein kinase DCLK1 OS=Rattus norvegicus OX=10116 GN=Dclk1 PE=1 SV=1 - [A0A0G2KB92_RAT]	1	1	-1.45518	-0.813123	-0.946421	-0.714404	-0.353375	-0.279777	-0.224543	-0.442569
G3V912	Thioredoxin domain containing 13 OS=Rattus norvegicus OX=10116 GN=Tmx4 PE=1 SV=1 - [G3V912_RAT]	2	6	0.496736	0.375687	1.17713	0.321359	0.705685	1.34091	1.18601	1.26395
Q4KLL0	Transcription elongation factor A protein 1 OS=Rattus norvegicus OX=10116 GN=Tcea1 PE=1 SV=1 - [TCEA1_RAT]	11	30	-0.34053	-0.28621	-0.428504	-0.0518069	-0.291574	-0.480787	-0.483127	-0.583997
D4AD70	Uncharacterized protein OS=Rattus norvegicus OX=10116 PE=3 SV=1 - [D4AD70_RAT]	6	16	-0.262689	-0.151899	-0.336048	-0.0275812	-0.40276	-0.632618	-0.58397	-0.577741
Q498S8	Frizzled-8 OS=Rattus norvegicus OX=10116 GN=Fzd8 PE=2 SV=1 - [FZD8_RAT]	2	2	-0.262553	-0.221036	-0.40528	-0.854136	-0.764025	-1.05568	-0.801895	-0.577256
D4A6T2	RNA pseudouridylate synthase domain containing 3 (Predicted), isoform CRA_c OS=Rattus norvegicus OX=10116 GN=Rpusd3 PE=4 SV=1 - [D4A6T2_RAT]	1	2	0.247961	0.341434	-0.400194	-0.547132	-0.429045	-0.39006	-0.691444	-0.479811
P15650	Long-chain specific acyl-CoA dehydrogenase, mitochondrial OS=Rattus norvegicus OX=10116 GN=Acadl PE=1 SV=1 - [ACADL_RAT]	19	174	0.148243	-0.184412	0.222163	-0.201121	-0.431177	-0.357212	-0.354898	-0.387966
D3ZZV1	Presequence translocase-associated motor 16 OS=Rattus norvegicus OX=10116 GN=Pam16 PE=1 SV=1 - [D3ZZV1_RAT]	4	18	0.108556	0.24003	-0.193789	-0.145946	-0.158503	-0.35264	-0.335169	-0.269514
A0A0G2K5P1	Hepatocyte nuclear factor 4-alpha OS=Rattus norvegicus OX=10116 GN=Hnf4a PE=1 SV=1 - [A0A0G2K5P1_RAT]	2	8	0.949638	0.227398	0.781102	0.478317	0.742584	0.769052	0.760595	0.770306
A0A0G2JTA5	Euchromatic histone lysine methyltransferase 2 OS=Rattus norvegicus OX=10116 GN=Ehmt2 PE=1 SV=1 - [A0A0G2JTA5_RAT]	4	8	0.519058	0.191854	-0.0727382	0.34322	0.546192	0.362926	0.514513	0.376238
D3ZAB6	Ring finger protein 219 OS=Rattus norvegicus OX=10116 GN=Rnf219 PE=4 SV=1 - [D3ZAB6_RAT]	1	4	0.705221	0.781233	0.338816	0.572142	0.95826	0.779335	0.952357	0.570786
P50398	Rab GDP dissociation inhibitor alpha OS=Rattus norvegicus OX=10116 GN=Gdi1 PE=1 SV=1 - [GDIA_RAT]	8	45	0.31746	0.216059	-0.119101	-0.140174	0.269563	0.4509	0.443852	0.315662
D3ZVS2	L-2-hydroxyglutarate dehydrogenase OS=Rattus norvegicus OX=10116 GN=L2hgdh PE=1 SV=1 - [D3ZVS2_RAT]	8	12	-0.138473	0.139696	-0.20583	-0.349536	-0.456843	-0.341707	-0.351667	-0.240349
Q6P6R2	Dihydrolipoyl dehydrogenase, mitochondrial OS=Rattus norvegicus OX=10116 GN=Dld PE=1 SV=1 - [DLDH_RAT]	18	127	-0.0386915	0.0402196	-0.300422	-0.132217	-0.469471	-0.730085	-0.726148	-0.732785
Q9WVK3	Peroxisomal trans-2-enoyl-CoA reductase OS=Rattus norvegicus OX=10116 GN=Pecr PE=2 SV=1 - [PECR_RAT]	7	44	-0.51894	-0.0764482	-0.211113	-0.438616	-0.391594	-0.331568	-0.430381	-0.363183
M0RBZ7	SH3 domain-containing kinase-binding protein 1 OS=Rattus norvegicus OX=10116 GN=Sh3kbp1 PE=1 SV=2 - [M0RBZ7_RAT]	6	11	-0.554891	-0.333485	-0.413042	-0.467367	-0.455486	-0.394494	-0.175127	-0.268145
Q9R010	Calcium and integrin-binding protein 1 OS=Rattus norvegicus OX=10116 GN=Cib1 PE=1 SV=3 - [CIB1_RAT]	3	3	0.752537	0.26437	0.715646	0.772048	0.466669	0.533501	0.484738	0.374833
D4ABM5	Mitochondrial ribosomal protein S34 OS=Rattus norvegicus OX=10116 GN=Mrps34 PE=1 SV=1 - [D4ABM5_RAT]	5	7	-0.300551	-0.0259578	-0.343333	-0.293227	-0.309252	-0.334862	-0.42073	-0.51557
D4AB70	alpha-1,2-Mannosidase OS=Rattus norvegicus OX=10116 GN=Edem3 PE=1 SV=3 - [D4AB70_RAT]	4	8	0.541414	0.489859	0.620784	0.477812	0.439673	0.548739	0.59891	0.644537
G3V9B7	Syndecan OS=Rattus norvegicus OX=10116 GN=Sdc3 PE=1 SV=1 - [G3V9B7_RAT]	1	1	0.490205	0.15233	0.443478	0.488174	0.671138	0.874421	0.898699	0.602818
A0A0G2JWF4	ASPSCR1, UBX domain-containing tether for SLC2A4 OS=Rattus norvegicus OX=10116 GN=Aspscr1 PE=1 SV=1 - [A0A0G2JWF4_RAT]	5	7	0.00391913	0.0753413	-0.423779	-0.0293443	-0.260427	-0.210533	-0.213429	-0.272253
P24329	Thiosulfate sulfurtransferase OS=Rattus norvegicus OX=10116 GN=Tst PE=1 SV=3 - [THTR_RAT]	11	148	0.251448	0.0975561	-0.125193	-0.32654	-0.288561	-0.211157	-0.241592	-0.217768
B5DEM3	Tmed4 protein OS=Rattus norvegicus OX=10116 GN=Tmed4 PE=2 SV=1 - [B5DEM3_RAT]	4	17	0.952986	0.781095	0.690625	0.196998	0.282792	0.618072	0.56957	0.466263
A0A0G2K2A5	Ubiquitin carboxyl-terminal hydrolase OS=Rattus norvegicus OX=10116 GN=Uchl5 PE=1 SV=1 - [A0A0G2K2A5_RAT]	7	11	0.357475	0.182768	0.183216	0.113959	0.192598	0.281962	0.187565	0.230736
D4ABI6	Ubiquitin carboxyl-terminal hydrolase OS=Rattus norvegicus OX=10116 GN=Uchl3 PE=1 SV=2 - [D4ABI6_RAT]	3	8	0.177149	0.351065	-0.276556	0.0990999	-0.110694	-0.330958	-0.461092	-0.581602
A0A0U1RRZ4	Uncharacterized protein OS=Rattus norvegicus OX=10116 PE=4 SV=1 - [A0A0U1RRZ4_RAT]	8	23	-0.544601	-0.336521	-0.257924	-0.505038	-0.650553	-0.429855	-0.489268	-0.558332
D3ZW58	Cancer susceptibility 4 OS=Rattus norvegicus OX=10116 GN=Casc4 PE=4 SV=3 - [D3ZW58_RAT]	4	6	-0.122654	-0.301245	0.140267	0.00678673	0.185937	0.378106	0.218227	0.353725
F1M661	BMP-binding endothelial regulator OS=Rattus norvegicus OX=10116 GN=Bmper PE=4 SV=2 - [F1M661_RAT]	2	2	0.77211	-0.132634	-0.176481	0.0548316	0.491311	0.608665	0.719948	0.823329
Q6GQQ2	PRKCA-binding protein OS=Rattus norvegicus OX=10116 GN=Pick1 PE=1 SV=1 - [Q6GQQ2_RAT]	1	1	1.22984	0.801742	1.14554	0.0606835	0.39045	1.19181	1.17319	1.32395
M0RCX0	Pterin-4 alpha-carbinolamine dehydratase 2 OS=Rattus norvegicus OX=10116 GN=Pcbd2 PE=1 SV=1 - [M0RCX0_RAT]	3	11	0.0582661	-0.0518459	-0.200653	-0.132035	-0.573176	-0.717457	-0.572515	-0.491146
O55158	Tetraspanin OS=Rattus norvegicus OX=10116 GN=Tspan8 PE=2 SV=2 - [O55158_RAT]	2	2	0.8864	-0.503073	-0.119285		0.606767	0.741717	0.755754	0.760445
D3ZFR9	Retinol dehydrogenase 13 OS=Rattus norvegicus OX=10116 GN=Rdh13 PE=1 SV=1 - [D3ZFR9_RAT]	2	3	-0.41446	-0.564159	-0.429663	-0.7552	-0.722178	-0.708873	-0.377889	-0.184391
Q6P796	Serine peptidase inhibitor, Kunitz type, 2 OS=Rattus norvegicus OX=10116 GN=Spint2 PE=1 SV=1 - [Q6P796_RAT]	2	3	0.364152	0.383099	0.309461	0.575383	0.450664	0.369904	0.39556	0.266081
M0R835	Splicing factor 3B, subunit 6 OS=Rattus norvegicus OX=10116 GN=Sf3b6 PE=1 SV=2 - [M0R835_RAT]	3	14	-0.209906	-0.245663	-0.430275	0.0692957	0.337712	0.29289	0.242318	0.289071
D3Z9M5	Peptidylprolyl isomerase OS=Rattus norvegicus OX=10116 GN=Fkbp7 PE=4 SV=1 - [D3Z9M5_RAT]	6	11	-1.37629	-1.53188	-0.966354	-0.651068	-0.511042	-0.517153	-0.512646	-0.454472
F1LZW6	Solute carrier family 25 member 13 OS=Rattus norvegicus OX=10116 GN=Slc25a13 PE=1 SV=2 - [F1LZW6_RAT]	18	85	-0.439049	0.0883375	-0.103362	-0.716648	-0.722874	-0.620611	-0.6317	-0.591578
A0A096MJ08	Putative bifunctional UDP-N-acetylglucosamine transferase and deubiquitinase ALG13 OS=Rattus norvegicus OX=10116 GN=Alg13 PE=1 SV=1 - [A0A096MJ08_RAT]	2	4	0.109329	0.0277978	0.565947	0.256621	0.143346	0.152741	0.271328	0.301854
P50399	Rab GDP dissociation inhibitor beta OS=Rattus norvegicus OX=10116 GN=Gdi2 PE=1 SV=2 - [GDIB_RAT]	15	54	-0.0295707	-0.0394787	-0.280724	-0.266894	-0.332388	-0.2836	-0.235795	-0.217895
D3ZJB1	Microfibril-associated protein 5 OS=Rattus norvegicus OX=10116 GN=Mfap5 PE=4 SV=1 - [D3ZJB1_RAT]	2	3	-2.03485	-1.57912	-0.851446	-0.775725	-0.696465	-0.737454	-1.07482	-0.941562
G3V6N1	Receptor protein-tyrosine kinase OS=Rattus norvegicus OX=10116 GN=Erbb3 PE=1 SV=1 - [G3V6N1_RAT]	2	2	-0.269263	0.223132	0.73277	0.350026	-0.274083	-0.471952	-0.330367	-0.241586
D4ABA5	RCG35999, isoform CRA_a OS=Rattus norvegicus OX=10116 GN=Smtn PE=1 SV=1 - [D4ABA5_RAT]	7	14	-0.931288	-0.959978	-1.03925	-1.02191	-0.90873	-0.717335	-0.719487	-0.841912
G3V8L7	Integrin alpha M OS=Rattus norvegicus OX=10116 GN=Itgam PE=1 SV=1 - [G3V8L7_RAT]	24	64	0.0635141	-0.32811	0.348406	-0.0528018	0.227845	0.690395	0.706244	0.690451
D3ZUL3	Collagen type VI alpha 1 chain OS=Rattus norvegicus OX=10116 GN=Col6a1 PE=1 SV=1 - [D3ZUL3_RAT]	29	169	-0.442935	-0.392498	-0.0788478	-0.500395	0.30857	0.846324	0.805062	0.891896
A0A0G2JU99	Selenoprotein P OS=Rattus norvegicus OX=10116 GN=Selenop PE=1 SV=1 - [A0A0G2JU99_RAT]	2	2	0.625626	0.320262	-0.0911377	0.0734711	0.394428	0.201211	0.3675	0.126339
Q2M2S1	Torsin OS=Rattus norvegicus OX=10116 GN=Tor1b PE=1 SV=1 - [Q2M2S1_RAT]	1	2	0.467042	0.315985	0.551169	0.35032	0.414194	0.653952	0.608185	0.532733
Q4V7D7	Pre-mRNA-splicing factor RBM22 OS=Rattus norvegicus OX=10116 GN=Rbm22 PE=2 SV=1 - [RBM22_RAT]	7	19	-0.184805	-0.233239	-0.142809	0.212881	0.306849	0.15329	0.17038	0.193303
Q6AY20	Cation-dependent mannose-6-phosphate receptor OS=Rattus norvegicus OX=10116 GN=M6pr PE=1 SV=1 - [MPRD_RAT]	10	32	0.619625	0.353937	0.509124	0.35332	0.277888	0.551528	0.544964	0.344897
F1M9B2	Insulin-like growth factor binding protein 7, isoform CRA_b OS=Rattus norvegicus OX=10116 GN=Igfbp7 PE=1 SV=2 - [F1M9B2_RAT]	6	13	-1.07368	-0.648787	-0.883414	-0.407845	-0.272479	-0.283679	-0.443819	-0.340994
Q4KLJ3	Nucleolar GTP-binding protein 2 OS=Rattus norvegicus OX=10116 GN=Gnl2 PE=1 SV=1 - [Q4KLJ3_RAT]	7	12	-0.323954	-0.340714	-0.0207882	0.0615049	0.181519	0.239146	0.113416	0.110116
P62832	60S ribosomal protein L23 OS=Rattus norvegicus OX=10116 GN=Rpl23 PE=2 SV=1 - [RL23_RAT]	4	15	-0.685366	0.382588	-0.175192	-0.178545	-0.395266	-0.669652	-0.625099	-0.710386
Q6AXN3	Transmembrane emp24 domain-containing protein 5 OS=Rattus norvegicus OX=10116 GN=Tmed5 PE=2 SV=1 - [TMED5_RAT]	5	18	0.522294	0.294213	0.587135	0.180541	0.120981	0.350291	0.304636	0.30492
D4A742	RCG37250, isoform CRA_a OS=Rattus norvegicus OX=10116 GN=Romo1 PE=1 SV=1 - [D4A742_RAT]	1	6	0.495267	0.546852	0.371853	0.0444345	-0.385733	-0.208675	-0.404175	-0.214787
F1LY38	CWC22 spliceosome-associated protein homolog OS=Rattus norvegicus OX=10116 GN=Cwc22 PE=1 SV=3 - [F1LY38_RAT]	4	8	0.19816	0.396616	0.473794	0.255376	0.701556	0.943538	0.831505	0.762265
Q45QM8	Guanine nucleotide binding protein alpha inhibiting 3 (Fragment) OS=Rattus norvegicus OX=10116 GN=Gnai3 PE=2 SV=1 - [Q45QM8_RAT]	4	33	-0.0585862	0.264929	0.407017	0.278557	0.206976	0.464447	0.431327	0.302853
F1LMG2	S-methylmethionine--homocysteine S-methyltransferase BHMT2 OS=Rattus norvegicus OX=10116 GN=Bhmt2 PE=1 SV=3 - [F1LMG2_RAT]	6	139	0.0616833	-1.03881	-0.891598	-0.657493	-0.988281	-1.13359	-1.32856	-1.17614
B2RYE9	YEATS domain containing 4 (Predicted), isoform CRA_b OS=Rattus norvegicus OX=10116 GN=Yeats4 PE=1 SV=1 - [B2RYE9_RAT]	3	5	0.183227	0.00792496	0.0547473	0.31613	0.419387	0.331024	0.523284	0.382864
Q4KM24	Peroxisomal biogenesis factor 11 beta OS=Rattus norvegicus OX=10116 GN=Pex11b PE=1 SV=1 - [Q4KM24_RAT]	2	2	-0.368003		0.0653253			-0.489092	-0.474714	-0.502936
Q5XFX7	RAD23 homolog A (S. cerevisiae) OS=Rattus norvegicus OX=10116 GN=Rad23a PE=1 SV=1 - [Q5XFX7_RAT]	3	13	0.344872	0.241627	-0.444851	-0.208	-0.449158	-0.470722	-0.525272	-0.527971
Q6AXR4	Beta-hexosaminidase subunit beta OS=Rattus norvegicus OX=10116 GN=Hexb PE=2 SV=1 - [HEXB_RAT]	7	30	0.461668	0.442175	0.453984	0.277362	0.19352	0.426464	0.401593	0.355355
D3Z9I2	BCL2-like 12 OS=Rattus norvegicus OX=10116 GN=Bcl2l12 PE=1 SV=1 - [D3Z9I2_RAT]	1	2	0.60367	0.311569	0.58032	0.0784907	0.547788	0.723456	0.639192	1.12236
A0A0G2K3W1	von Willebrand factor A domain-containing 8 OS=Rattus norvegicus OX=10116 GN=Vwa8 PE=1 SV=1 - [A0A0G2K3W1_RAT]	2	4	-0.275713	-0.0679198	-0.155864	-0.322106	-0.317557	-0.351686	-0.38465	-0.451349
G3V7K2	Leukemia inhibitory factor receptor OS=Rattus norvegicus OX=10116 GN=Lifr PE=1 SV=1 - [G3V7K2_RAT]	14	33	0.681131	0.559901	0.882618	0.708627	0.545077	0.572783	0.558676	0.428301
A0A0G2JTD1	Regulation of nuclear pre-mRNA domain-containing 2 OS=Rattus norvegicus OX=10116 GN=Rprd2 PE=1 SV=1 - [A0A0G2JTD1_RAT]	19	38	0.118571	-0.157723	0.213415	0.443571	0.206571	0.17101	0.151911	0.212697
P01830	Thy-1 membrane glycoprotein OS=Rattus norvegicus OX=10116 GN=Thy1 PE=1 SV=1 - [THY1_RAT]	1	1	0.761503	0.0748009	0.256728	0.219354	0.805973	0.826022	0.617674	0.915728
P34926	Microtubule-associated protein 1A OS=Rattus norvegicus OX=10116 GN=Map1a PE=1 SV=1 - [MAP1A_RAT]	12	24	-1.23932	-0.374837	-0.477952	-0.595498	-0.580485	-0.624833	-0.659652	-0.845738
D3ZU74	Cytoplasmic dynein 1 intermediate chain 2 OS=Rattus norvegicus OX=10116 GN=Dync1i2 PE=1 SV=1 - [D3ZU74_RAT]	6	17	-0.0646845	-0.258381	-0.265366	-0.086731	-0.247519	-0.310574	-0.267935	-0.39057
R4I4V9	Neutrophil cytosolic factor 2 mutant isoform 2 OS=Rattus norvegicus OX=10116 GN=Ncf2 PE=2 SV=1 - [R4I4V9_RAT]	5	8	0.53805	0.153793	0.275347	0.0875549	0.282994	0.478155	0.409498	0.32565
A2VD04	Habp2 protein OS=Rattus norvegicus OX=10116 GN=Habp2 PE=1 SV=1 - [A2VD04_RAT]	1	2	-0.521651	-0.737827	-0.888756	-0.0957117	-0.301745	-0.536111	-0.554127	-0.45747
P07150	Annexin A1 OS=Rattus norvegicus OX=10116 GN=Anxa1 PE=1 SV=2 - [ANXA1_RAT]	15	110	0.255544	-0.559047	-0.0783414	-0.0717473	0.26044	0.61374	0.653402	0.669777
F1M1R8	Uncharacterized protein OS=Rattus norvegicus OX=10116 PE=1 SV=3 - [F1M1R8_RAT]	3	4	-0.146099	-0.392364	-0.194612	0.119992	0.838784	0.765626	0.905604	0.716533
F1M0K4	Uncharacterized protein OS=Rattus norvegicus OX=10116 PE=4 SV=3 - [F1M0K4_RAT]	1	1	-0.869154	-1.0303	-0.0772105	-0.111445	-1.00515	-1.3705	-1.28481	-0.623125
A0A0G2JSQ3	Solute carrier family 22 (Organic anion transporter), member 8, isoform CRA_a OS=Rattus norvegicus OX=10116 GN=Slc22a8 PE=1 SV=1 - [A0A0G2JSQ3_RAT]	1	1	-0.0855977	-0.253407	-0.309726	-0.240547	-0.278716	-0.213348	-0.247635	-0.202412
A0A0G2JSU3	Protein SET OS=Rattus norvegicus OX=10116 GN=Set PE=1 SV=1 - [A0A0G2JSU3_RAT]	9	36	-0.335613	-0.303299	-0.693154	-0.152023	-0.446735	-0.741262	-0.718743	-0.634507
D3ZCR9	UBX domain-containing protein 7-like OS=Rattus norvegicus OX=10116 GN=LOC100911374 PE=4 SV=2 - [D3ZCR9_RAT]	1	2	0.23687	-0.0256141	-0.529942	-0.213331	-0.292133	-0.438466	-0.485794	-0.355026
Q6AXY4	DNA polymerase delta subunit 2 OS=Rattus norvegicus OX=10116 GN=Pold2 PE=1 SV=1 - [DPOD2_RAT]	1	1	0.606439	0.359805	-0.00736621	0.398041	0.692099	1.08528	0.922121	0.511353
Q5XI04	RCG45489, isoform CRA_a OS=Rattus norvegicus OX=10116 GN=Stom PE=1 SV=1 - [Q5XI04_RAT]	6	28	0.3274	0.25626	0.262594	-0.0769383	0.423245	0.557657	0.425511	0.544654
Q62658	Peptidyl-prolyl cis-trans isomerase FKBP1A OS=Rattus norvegicus OX=10116 GN=Fkbp1a PE=1 SV=3 - [FKB1A_RAT]	1	12	0.0194734	0.185385	-0.166922	-0.282591	-0.334368	-0.435112	-0.60222	-0.553028
F7EL36	Acidic leucine-rich nuclear phosphoprotein 32 family member A OS=Rattus norvegicus OX=10116 GN=Anp32a PE=1 SV=2 - [F7EL36_RAT]	11	54	0.2248	0.131017	-0.411428	-0.132182	-0.268611	-0.452101	-0.470948	-0.42652
Q6P791	Ragulator complex protein LAMTOR1 OS=Rattus norvegicus OX=10116 GN=Lamtor1 PE=1 SV=1 - [LTOR1_RAT]	5	16	0.413553	0.153328	0.720001	0.0963234	0.26896	0.653864	0.667345	0.501968
A0A0H2UI40	Breast cancer metastasis-suppressor 1 homolog OS=Rattus norvegicus OX=10116 GN=LOC108348098 PE=4 SV=1 - [A0A0H2UI40_RAT]	1	1	0.863614	0.183551	-0.154417	0.450722	0.873387	0.731776	0.7083	0.85997
F1M823	Intersectin-1 OS=Rattus norvegicus OX=10116 GN=Itsn1 PE=1 SV=3 - [F1M823_RAT]	20	53	-0.131446	-0.251835	-0.490184	-0.0899313	-0.406518	-0.609542	-0.655614	-0.639592
A0A0G2JVC8	Terpene cyclase/mutase family member OS=Rattus norvegicus OX=10116 GN=Lss PE=1 SV=1 - [A0A0G2JVC8_RAT]	13	42	-0.162929	0.484398	0.740583	0.3382	-0.31326	-0.424688	-0.431531	-0.451848
F1MA10	NAD(P)(+)--arginine ADP-ribosyltransferase OS=Rattus norvegicus OX=10116 GN=Art4 PE=1 SV=2 - [F1MA10_RAT]	4	7	0.672553	0.313932	0.948963	0.455059	0.395979	0.550535	0.531218	0.449009
P19234	NADH dehydrogenase [ubiquinone] flavoprotein 2, mitochondrial OS=Rattus norvegicus OX=10116 GN=Ndufv2 PE=1 SV=2 - [NDUV2_RAT]	10	77	-0.0535736	0.00222168	-0.0913359	0.0370768	-0.204363	-0.360555	-0.400269	-0.470472
P20650	Protein phosphatase 1A OS=Rattus norvegicus OX=10116 GN=Ppm1a PE=1 SV=1 - [PPM1A_RAT]	5	13	-0.0222723	0.0518864	-0.27379	-0.147448	-0.113917	-0.306273	-0.345962	-0.268751
Q5M9G5	Coiled-coil domain-containing protein 117 OS=Rattus norvegicus OX=10116 GN=Ccdc117 PE=2 SV=1 - [CC117_RAT]	1	2	-0.174035	-0.333436	-0.638029	-0.517788	-0.682359	-0.615622	-0.696	-1.00753
P11517	Hemoglobin subunit beta-2 OS=Rattus norvegicus OX=10116 PE=1 SV=2 - [HBB2_RAT]	3	906	1.08011	0.0491536	-0.0273112	0.352187	0.34855	0.495496	0.47436	0.388567
M0RDA4	EPH receptor B4 OS=Rattus norvegicus OX=10116 GN=Ephb4 PE=1 SV=2 - [M0RDA4_RAT]	4	7	-0.0455084	0.238161	0.335083	0.195752	0.216856	0.348027	0.426565	0.492925
A0A0G2K3C1	Hsp90 co-chaperone Cdc37 OS=Rattus norvegicus OX=10116 GN=Cdc37 PE=1 SV=1 - [A0A0G2K3C1_RAT]	10	25	0.515001	0.547772	0.0599544	0.367583	0.369484	0.188931	0.174597	0.112125
Q6MGB2	Collagen type XI alpha 2 chain OS=Rattus norvegicus OX=10116 GN=Col11a2 PE=4 SV=1 - [Q6MGB2_RAT]	1	5	-2.17867	-2.36527	-2.13635	-1.95115	-1.95373	-1.97012	-2.06801	-2.07376
D3ZUD3	WAS/WASL-interacting protein family, member 2 OS=Rattus norvegicus OX=10116 GN=Wipf2 PE=1 SV=1 - [D3ZUD3_RAT]	3	5	-0.181083	-0.378189	-0.642445	-0.269619	-0.354527	-0.6982	-0.656288	-0.595943
D4AAZ8	Interferon regulatory factor 2 binding protein 1 (Predicted) OS=Rattus norvegicus OX=10116 GN=Irf2bp1 PE=1 SV=1 - [D4AAZ8_RAT]	1	2	-0.412806	-0.381944	-0.668612	-0.594119	-0.511581	-0.403479	-0.419025	-0.275619
D3ZQI1	Glutathione peroxidase OS=Rattus norvegicus OX=10116 GN=Gpx7 PE=1 SV=1 - [D3ZQI1_RAT]	7	17	0.104516	0.0632519	0.238719	0.131049	0.346739	0.505066	0.539076	0.462232
Q9QWJ9	Neuropilin-1 OS=Rattus norvegicus OX=10116 GN=Nrp1 PE=1 SV=1 - [NRP1_RAT]	4	6	-0.160274	-0.0572274	0.182261	0.163683	0.171164	0.255243	0.341961	0.270655
D4AB03	Family with sequence similarity 120A OS=Rattus norvegicus OX=10116 GN=Fam120a PE=1 SV=2 - [D4AB03_RAT]	6	17	-0.0952918	0.0687681	-0.423507	-0.435902	-0.25671	-0.260822	-0.248878	-0.46389
P09895	60S ribosomal protein L5 OS=Rattus norvegicus OX=10116 GN=Rpl5 PE=1 SV=3 - [RL5_RAT]	12	47	-0.507629	0.149257	-0.533242	-0.585067	-0.509095	-0.610017	-0.517976	-0.428176
M0R6L8	DnaJ heat shock protein family (Hsp40) member C19 OS=Rattus norvegicus OX=10116 GN=Dnajc19 PE=1 SV=1 - [M0R6L8_RAT]	3	9	-0.288996	0.0347732	-0.33692	-0.105374	-0.261887	-0.401931	-0.449004	-0.495008
D4A1B8	Dynactin subunit 3 OS=Rattus norvegicus OX=10116 GN=Dctn3 PE=1 SV=1 - [D4A1B8_RAT]	3	5	0.563065	0.0536503	0.0839894	0.118457	0.382044	0.527633	0.395183	0.480535
G3V9K0	Cysteinyl-tRNA synthetase OS=Rattus norvegicus OX=10116 GN=Cars PE=1 SV=1 - [G3V9K0_RAT]	6	9	-0.245697	-0.265558	0.0317531	-0.132987	-0.177393	-0.671532	-0.820993	-0.837962
D3ZRN1	RCG48101, isoform CRA_c OS=Rattus norvegicus OX=10116 GN=Tmem179b PE=1 SV=1 - [D3ZRN1_RAT]	1	1	0.495032	-0.804374	-0.402421	0.0156796	1.36525	0.927644	0.871487	0.873807
Q3SWU3	Heterogeneous nuclear ribonucleoprotein D-like OS=Rattus norvegicus OX=10116 GN=Hnrnpdl PE=1 SV=1 - [HNRDL_RAT]	7	25	-0.548485	-0.0403596	-0.733035	-0.186573	-0.366883	-0.659469	-0.74369	-0.77102
D4ABX6	Multimerin 2 OS=Rattus norvegicus OX=10116 GN=Mmrn2 PE=1 SV=1 - [D4ABX6_RAT]	7	16	0.504982	0.194228	0.286558	0.129821	0.494956	0.49994	0.476957	0.575665
G3V647	Pyridoxal kinase OS=Rattus norvegicus OX=10116 GN=Pdxk PE=1 SV=1 - [G3V647_RAT]	4	12	0.354125	-0.124731	0.404182	-0.160701	-0.322726	-0.201	-0.162025	-0.176564
Q5XI34	Protein phosphatase 2 (Formerly 2A), regulatory subunit A (PR 65), alpha isoform, isoform CRA_a OS=Rattus norvegicus OX=10116 GN=Ppp2r1a PE=1 SV=1 - [Q5XI34_RAT]	19	48	0.549122	0.341278	0.4569	0.240692	0.382811	0.592025	0.566195	0.524904
D3ZHV0	Nucleoporin-like 2 OS=Rattus norvegicus OX=10116 GN=Nupl2 PE=1 SV=1 - [D3ZHV0_RAT]	9	22	0.279656	0.0268266	0.697183	0.694217	0.529052	0.450144	0.378847	0.439372
Q10758	Keratin, type II cytoskeletal 8 OS=Rattus norvegicus OX=10116 GN=Krt8 PE=1 SV=3 - [K2C8_RAT]	41	1450	0.41998	0.275728	0.284712	0.256724	0.573747	0.758224	0.730967	0.728984
D3ZH75	AKT1 substrate 1 OS=Rattus norvegicus OX=10116 GN=Akt1s1 PE=1 SV=1 - [D3ZH75_RAT]	4	7	0.131544	0.000920215	-0.23604	0.0523911	-0.276096	-0.461214	-0.465257	-0.441774
P31044	Phosphatidylethanolamine-binding protein 1 OS=Rattus norvegicus OX=10116 GN=Pebp1 PE=1 SV=3 - [PEBP1_RAT]	6	74	-0.102867	-0.202367	-0.508637	-0.100797	-0.402316	-0.766936	-0.780034	-0.834318
P18395	Cold shock domain-containing protein E1 OS=Rattus norvegicus OX=10116 GN=Csde1 PE=2 SV=1 - [CSDE1_RAT]	19	36	-0.0725822	-0.251952	-0.439177	-0.0253179	-0.244004	-0.480689	-0.505294	-0.498871
M0RAT6	Protein TMED8 OS=Rattus norvegicus OX=10116 GN=Tmed8 PE=1 SV=2 - [M0RAT6_RAT]	1	1	-0.352942	-0.332032	-0.389864	-0.142163	-0.121734	-0.263938	-0.288456	-0.469748
A0JPN7	Cleavage stimulation factor, 3' pre-RNA, subunit 3 OS=Rattus norvegicus OX=10116 GN=Cstf3 PE=2 SV=1 - [A0JPN7_RAT]	1	12	-0.155155	0.134163	0.0564267	-0.333966	0.482263	0.868603	0.725225	0.899404
D3ZAY8	Pinin, desmosome-associated protein OS=Rattus norvegicus OX=10116 GN=Pnn PE=1 SV=1 - [D3ZAY8_RAT]	22	57	-0.0315442	0.12565	0.237702	0.518216	0.43803	0.315211	0.336719	0.29853
P97710	Tyrosine-protein phosphatase non-receptor type substrate 1 OS=Rattus norvegicus OX=10116 GN=Sirpa PE=1 SV=1 - [SHPS1_RAT]	6	22	0.404175	0.114124	0.568356	0.546093	0.474163	0.533908	0.434551	0.500887
B5DF70	Strn4 protein OS=Rattus norvegicus OX=10116 GN=Strn4 PE=2 SV=1 - [B5DF70_RAT]	3	8	0.417588	0.183124	0.161586	0.407979	0.383213	0.437844	0.388572	0.291541
Q5GAM3	Ribonuclease 16 OS=Rattus norvegicus OX=10116 GN=LOC100361814 PE=3 SV=1 - [Q5GAM3_RAT]	6	17	0.36354	-0.0371351	-0.254297	-0.246039	0.682467	0.966289	0.324779	0.809958
A0A0G2JSW3	Globin a4 OS=Rattus norvegicus OX=10116 GN=Hbb PE=1 SV=1 - [A0A0G2JSW3_RAT]	5	1117	1.06225	-0.110801	-0.00202874	0.317753	0.421106	0.498807	0.445842	0.542826
A0A0G2K3N2	CD84 molecule OS=Rattus norvegicus OX=10116 GN=Cd84 PE=4 SV=1 - [A0A0G2K3N2_RAT]	3	5	0.512768	0.120687	0.296824	0.421888	0.470164	0.54854	0.609365	0.501762
F2Z3S5	RNA-binding protein, mRNA-processing factor OS=Rattus norvegicus OX=10116 GN=Rbpms PE=1 SV=3 - [F2Z3S5_RAT]	4	17	-0.123341	-0.35636	-0.579046	-0.546162	-0.546842	-0.564163	-0.561726	-0.556702
M0RCU5	Ureidoimidazoline (2-oxo-4-hydroxy-4-carboxy-5-) decarboxylase OS=Rattus norvegicus OX=10116 GN=Urad PE=1 SV=2 - [M0RCU5_RAT]	6	10	0.222616	-0.300968	-0.35177	-0.487252	-0.461341	-0.491967	-0.381922	-0.279333
D3ZK14	Tenascin N OS=Rattus norvegicus OX=10116 GN=Tnn PE=4 SV=2 - [D3ZK14_RAT]	1	2	-1.48278	-1.60838	-1.09086	-1.55828	-1.22063	-0.903276	-0.974612	-0.914547
Q70VB1	G-protein coupled receptor family C group 6 member A OS=Rattus norvegicus OX=10116 GN=Gprc6a PE=1 SV=1 - [GPC6A_RAT]	1	2	1.36258	0.871697	0.786238	0.844618	1.04155	1.2698	1.36558	1.41229
Q3MIB4	Lon protease homolog 2, peroxisomal OS=Rattus norvegicus OX=10116 GN=Lonp2 PE=1 SV=2 - [LONP2_RAT]	9	14	-1.02105	-0.227404	-0.678461	-0.723937	-0.606029	-0.852733	-0.916086	-0.834217
D3ZZQ6	Integrator complex subunit 4 OS=Rattus norvegicus OX=10116 GN=Ints4 PE=1 SV=1 - [D3ZZQ6_RAT]	8	17	-0.287693	-0.262075	0.405695	0.220511	0.343176	0.593393	0.562097	0.513343
F1LSS7	Collectin sub-family member 11 OS=Rattus norvegicus OX=10116 GN=Colec11 PE=1 SV=2 - [F1LSS7_RAT]	7	18	0.487167	0.305175	0.579038	0.730781	0.509408	0.382187	0.270555	0.43544
F1M8F0	RNA-binding motif protein 7 OS=Rattus norvegicus OX=10116 GN=Rbm7 PE=1 SV=3 - [F1M8F0_RAT]	3	7	0.493942	0.378574	-0.218399	0.285806	0.517584	0.507855	0.491437	0.43268
P38062	Methionine aminopeptidase 2 OS=Rattus norvegicus OX=10116 GN=Metap2 PE=1 SV=2 - [MAP2_RAT]	4	6		-1.67552	-1.98021		-1.41605	-1.52497	-1.63889
P23711	Heme oxygenase 2 OS=Rattus norvegicus OX=10116 GN=Hmox2 PE=1 SV=1 - [HMOX2_RAT]	6	31	0.364217	0.236788	0.601483	0.130639	0.246172	0.522245	0.466831	0.375245
Q6AXU6	Jupiter microtubule associated homolog 1 OS=Rattus norvegicus OX=10116 GN=JPT1 PE=1 SV=3 - [JUPI1_RAT]	3	13	0.130596	0.200043	-0.289449	-0.19822	-0.282636	-0.445084	-0.529415	-0.819103
Q5M7V3	LOC367586 protein OS=Rattus norvegicus OX=10116 GN=LOC367586 PE=2 SV=1 - [Q5M7V3_RAT]	9	46	-1.01249	-1.03338	-1.23675	-1.04937	-0.85262	-0.870676	-0.852641	-0.894752
Q498R0	TAF6 RNA polymerase II, TATA box binding protein (TBP)-associated factor OS=Rattus norvegicus OX=10116 GN=Taf6 PE=1 SV=1 - [Q498R0_RAT]	9	19	-0.118411	-0.36088	0.212155	0.109261	0.29355	0.303429	0.382731	0.37167
Q63488	Sodium-dependent phosphate transporter 2 OS=Rattus norvegicus OX=10116 GN=Slc20a2 PE=1 SV=1 - [S20A2_RAT]	2	7	0.0673358	0.141921	-0.198328	-0.815338	-0.361116	-0.440822	-0.505551	-0.558645
A0A0G2K3Z9	Uncharacterized protein OS=Rattus norvegicus OX=10116 PE=4 SV=1 - [A0A0G2K3Z9_RAT]	13	377	0.259946	-0.19876	-0.57172	-0.261823	-0.618804	-0.746174	-0.807679	-0.827242
P20762	Ig gamma-2C chain C region OS=Rattus norvegicus OX=10116 PE=2 SV=1 - [IGG2C_RAT]	4	12	0.628036	-0.056779	0.2624	0.246651	0.488075	0.911548	0.750692	0.792371
F1M265	Uncharacterized protein OS=Rattus norvegicus OX=10116 PE=1 SV=3 - [F1M265_RAT]	12	32	-0.875321	-0.891863	-0.642001	-0.45913	-0.399895	-0.479074	-0.455713	-0.486515
Q6XFR6	Glycophorin-C OS=Rattus norvegicus OX=10116 GN=Gypc PE=1 SV=1 - [GLPC_RAT]	2	3	0.180742	0.136956	0.710829	0.316503	0.175426	0.436348	0.928469	0.801859
D3ZX38	Prefoldin 1 (Predicted) OS=Rattus norvegicus OX=10116 GN=Pfdn1 PE=1 SV=1 - [D3ZX38_RAT]	6	31	0.181754	0.148163	-0.449637	-0.249214	-0.495377	-0.662005	-0.675877	-0.669051
Q5FVM5	Cyclic AMP-responsive element-binding protein 3-like protein 3 OS=Rattus norvegicus OX=10116 GN=Creb3l3 PE=2 SV=1 - [CR3L3_RAT]	1	2	-0.146206	-0.0848782	-0.17657	-0.11071	-0.396884	-0.613936	-0.588598	-0.598154
Q3B8P7	RCG58555, isoform CRA_a OS=Rattus norvegicus OX=10116 GN=LOC683897 PE=2 SV=1 - [Q3B8P7_RAT]	5	12	-0.006714	0.369266	-0.303076	-0.146685	-0.133778	-0.542178	-0.554765	-0.765325
A0A0G2K1I6	Secretory carrier-associated membrane protein OS=Rattus norvegicus OX=10116 GN=Scamp1 PE=1 SV=1 - [A0A0G2K1I6_RAT]	5	15	-0.059713	0.184694	0.127849	-0.138386	0.38859	0.547483	0.569648	0.60122
Q63118	Calcitonin gene-related peptide type 1 receptor OS=Rattus norvegicus OX=10116 GN=Calcrl PE=2 SV=1 - [CALRL_RAT]	2	3	1.58599	2.11252	2.02549	1.60188	0.679578	0.636409	0.644029	0.773209
Q99N97	H-caldesmon (Fragment) OS=Rattus norvegicus OX=10116 PE=2 SV=1 - [Q99N97_RAT]	1	2	-3.01702	-1.30238	-3.60093	-0.0348979	-4.04769	-2.85362	-0.81695	-3.64954
D3ZQI6	Exportin 4 OS=Rattus norvegicus OX=10116 GN=Xpo4 PE=1 SV=2 - [D3ZQI6_RAT]	5	7	0.117572	0.289632	0.167621	0.117959	0.453077	0.293498	0.283551	0.263517
Q498U6	DNA fragmentation factor subunit alpha OS=Rattus norvegicus OX=10116 GN=Dffa PE=1 SV=1 - [Q498U6_RAT]	2	4	-0.222602	0.25237	-0.28872	-0.190448	-0.443552	-0.595808	-0.603286	-0.755105
Q5EAJ6	Inhibitor of nuclear factor kappa-B kinase-interacting protein OS=Rattus norvegicus OX=10116 GN=Ikbip PE=2 SV=1 - [IKIP_RAT]	14	42	-0.0972975	-0.364793	0.0706964	0.241985	0.343696	0.369079	0.412499	0.387368
Q9JIH7	Serine/threonine-protein kinase WNK1 OS=Rattus norvegicus OX=10116 GN=Wnk1 PE=1 SV=2 - [WNK1_RAT]	8	13	0.0903379	-0.0964798	-0.360573	-0.273478	-0.199661	-0.401707	-0.433952	-0.382124
Q7TMZ5	ADP-ribosylation factor-like 6 interacting protein 1 OS=Rattus norvegicus OX=10116 GN=Arl6ip1 PE=1 SV=1 - [Q7TMZ5_RAT]	1	4	-0.0263329	0.187703	0.174963	0.202234	0.35081	0.399398	0.429154	0.270713
Q4KLZ0	Vanin 1 OS=Rattus norvegicus OX=10116 GN=Vnn1 PE=1 SV=1 - [Q4KLZ0_RAT]	6	17	0.591945	0.628273	0.767137	0.156279	0.315327	0.463289	0.613692	0.609499
A1L1J8	RAB5B, member RAS oncogene family OS=Rattus norvegicus OX=10116 GN=Rab5b PE=1 SV=1 - [A1L1J8_RAT]	3	14	0.134024	0.518703	0.421386	0.0411101	0.31985	0.511837	0.532848	0.583663
F1LUA1	Early endosome antigen 1 OS=Rattus norvegicus OX=10116 GN=Eea1 PE=1 SV=1 - [F1LUA1_RAT]	50	111	-0.115109	-0.121041	-0.437934	-0.152865	-0.331935	-0.443538	-0.456671	-0.46683
P62747	Rho-related GTP-binding protein RhoB OS=Rattus norvegicus OX=10116 GN=Rhob PE=1 SV=1 - [RHOB_RAT]	2	4	0.0806272	0.835589	0.657057	0.545614	0.839568	0.797499	0.681202	0.615826
A9UMW0	Ubiquitin-Like 5 Protein, isoform CRA_a OS=Rattus norvegicus OX=10116 GN=Ubl5 PE=1 SV=1 - [A9UMW0_RAT]	4	7	-0.291054	-0.232194	-0.316006	0.287473	0.196419	0.242754	0.24461	0.198606
D3ZBT9	Protein phosphatase 6, regulatory subunit 3 OS=Rattus norvegicus OX=10116 GN=Ppp6r3 PE=1 SV=2 - [D3ZBT9_RAT]	6	10	0.186738	-0.231983	-0.379105	-0.241229	-0.395395	-0.399306	-0.368127	-0.653342
D4ABB8	Probable phospholipid-transporting ATPase IIB OS=Rattus norvegicus OX=10116 GN=Atp9b PE=3 SV=1 - [ATP9B_RAT]	2	4	0.226618	0.406223	0.454817	0.491799	0.468373	0.487257	0.561121	0.484066
D3ZJ32	Extended synaptotagmin 2 OS=Rattus norvegicus OX=10116 GN=Esyt2 PE=1 SV=3 - [D3ZJ32_RAT]	3	7	0.392588	0.665356	0.195838	0.197537	0.629473	0.690984	0.423502	0.470414
A3RLA8	Fc fragment of IgG receptor IIb OS=Rattus norvegicus OX=10116 GN=Fcgr2b PE=1 SV=1 - [A3RLA8_RAT]	3	8	0.733508	0.845635	1.0194	0.538209	0.18226	0.26539	0.422245	0.4326
O35817	A-kinase anchor protein 14 OS=Rattus norvegicus OX=10116 GN=Akap14 PE=2 SV=1 - [AKA14_RAT]	1	1	1.16916	0.538173	1.03338	0.831534	0.682519	0.769022	0.928523	0.761106
A0A0G2JXY6	Sodium channel subunit beta-1 OS=Rattus norvegicus OX=10116 GN=Scn1b PE=4 SV=1 - [A0A0G2JXY6_RAT]	1	2	-0.184488	-0.47987	-0.171826	-0.234196	0.357492	0.839819	0.720009	0.71866
D3ZY96	Neutrophilic granule protein OS=Rattus norvegicus OX=10116 GN=Ngp PE=1 SV=1 - [D3ZY96_RAT]	13	78	-0.0483142	-0.604648	0.10876	-0.161363	0.330684	0.712048	0.721426	0.676988
Q5XI67	F-box only protein 30 OS=Rattus norvegicus OX=10116 GN=Fbxo30 PE=1 SV=1 - [FBX30_RAT]	2	2	-0.164725	-0.668471	-0.978208	-0.52351	-0.294765	-0.425829	-0.420924	-0.53003
M0RCA3	RCG47159, isoform CRA_a OS=Rattus norvegicus OX=10116 GN=Zfpl1 PE=1 SV=1 - [M0RCA3_RAT]	2	5	0.69013	0.376173	0.507454	0.610041	0.334565	0.241972	0.467113	0.662885
P08290	Asialoglycoprotein receptor 2 OS=Rattus norvegicus OX=10116 GN=Asgr2 PE=1 SV=4 - [ASGR2_RAT]	2	4	-0.26256	-0.267132	0.0804938	-0.23032	0.211872	0.420517	0.444732	0.496863
Q9Z1A6	Vigilin OS=Rattus norvegicus OX=10116 GN=Hdlbp PE=1 SV=1 - [VIGLN_RAT]	1	128	0.00281329	0.140073	-0.436154	0.0829809	-0.108191	-0.402546	-0.535184	-0.534944
D3ZF13	Acyl carrier protein OS=Rattus norvegicus OX=10116 GN=Ndufab1 PE=1 SV=1 - [D3ZF13_RAT]	5	34	0.312361	0.389421	0.0834532	0.261398	-0.200265	-0.475489	-0.56785	-0.553537
D4A133	ATPase H+-transporting V1 subunit A OS=Rattus norvegicus OX=10116 GN=Atp6v1a PE=1 SV=1 - [D4A133_RAT]	18	55	0.411396	0.0957756	0.584063	0.0944806	0.220996	0.46141	0.432771	0.551727
Q4FZX5	Methionine-R-sulfoxide reductase B2, mitochondrial OS=Rattus norvegicus OX=10116 GN=Msrb2 PE=2 SV=1 - [MSRB2_RAT]	6	18	-0.318934	-0.176233	-0.534218	-0.00458137	-0.346218	-0.674832	-0.700841	-0.761601
B0BNL2	Peptidyl-prolyl cis-trans isomerase OS=Rattus norvegicus OX=10116 GN=Pin1 PE=1 SV=1 - [B0BNL2_RAT]	3	10	-0.136287	-0.0576717	-0.43866	-0.263864	-0.412383	-0.601925	-0.70497	-0.477853
F1LSC3	Splicing factor 1 OS=Rattus norvegicus OX=10116 GN=Sf1 PE=1 SV=2 - [F1LSC3_RAT]	9	43	-0.414268	-0.118169	-0.664659	-0.065259	-0.202765	-0.414169	-0.524775	-0.622796
D3ZCX6	RNA exonuclease 1 homolog OS=Rattus norvegicus OX=10116 GN=Rexo1 PE=1 SV=1 - [D3ZCX6_RAT]	2	2	-0.406203	-0.782175	-0.456799	-0.286467	-0.646331	-0.525895	-0.553148	-0.295415
D3ZIY3	YTH N(6)-methyladenosine RNA-binding protein 3 OS=Rattus norvegicus OX=10116 GN=Ythdf3 PE=1 SV=1 - [D3ZIY3_RAT]	5	15	-0.0272168	-0.0317476	-0.349536	-0.204867	-0.442962	-0.494385	-0.300622	-0.378847
D4A626	Calmin OS=Rattus norvegicus OX=10116 GN=Clmn PE=1 SV=1 - [D4A626_RAT]	19	47	-0.0155766	-0.170993	0.197736	0.0532968	0.262982	0.489877	0.454177	0.491906
Q4FZV0	Beta-mannosidase OS=Rattus norvegicus OX=10116 GN=Manba PE=2 SV=1 - [MANBA_RAT]	6	10	0.137827	-0.349462	0.0776673	-0.0278457	0.255929	0.520727	0.456226	0.246611
D4A8C8	PAX3 and PAX7-binding protein 1 OS=Rattus norvegicus OX=10116 GN=Paxbp1 PE=1 SV=1 - [D4A8C8_RAT]	6	10	-0.544015	-0.307453	-0.193096	0.283009	0.324235	0.198139	0.306223	0.257746
Q64548	Reticulon-1 OS=Rattus norvegicus OX=10116 GN=Rtn1 PE=1 SV=1 - [RTN1_RAT]	6	11	0.101785	-0.152346	0.189105	-0.121842	-0.615123	-0.785158	-0.793818	-0.500351
Q496Z0	Elongator complex protein 2 OS=Rattus norvegicus OX=10116 GN=Elp2 PE=2 SV=1 - [ELP2_RAT]	4	9	0.527001	0.0732579	0.203716	0.315969	0.300162	0.24391	0.245321	0.130545
P35465	Serine/threonine-protein kinase PAK 1 OS=Rattus norvegicus OX=10116 GN=Pak1 PE=1 SV=3 - [PAK1_RAT]	1	7	-0.342052	-0.488381	-0.300244	-0.379628	-0.242852	-0.499025	-0.409053	-0.314848
A0A0G2K1A2	Myeloperoxidase OS=Rattus norvegicus OX=10116 GN=Mpo PE=1 SV=1 - [A0A0G2K1A2_RAT]	8	741	0.427658	-0.355297	0.263145	0.301847	0.521111	0.73211	0.601006	0.717687
D4A6W6	Uncharacterized protein OS=Rattus norvegicus OX=10116 PE=3 SV=1 - [D4A6W6_RAT]	5	23	-0.63459	0.0500482	-0.460101	-0.61902	-0.694504	-0.817592	-0.780992	-0.663261
P22791	Hydroxymethylglutaryl-CoA synthase, mitochondrial OS=Rattus norvegicus OX=10116 GN=Hmgcs2 PE=1 SV=1 - [HMCS2_RAT]	30	257	-0.693204	0.0265415	-0.399819	-0.823641	-0.700587	-0.557625	-0.580174	-0.590694
P11951	Cytochrome c oxidase subunit 6C-2 OS=Rattus norvegicus OX=10116 GN=Cox6c2 PE=1 SV=3 - [CX6C2_RAT]	5	18	-0.277432	0.238824	-0.158757	-0.423437	-0.340495	-0.330751	-0.430232	-0.390828
P18163	Long-chain-fatty-acid--CoA ligase 1 OS=Rattus norvegicus OX=10116 GN=Acsl1 PE=1 SV=1 - [ACSL1_RAT]	32	177	-1.35707	-0.501189	-0.603703	-1.36089	-1.09657	-0.83332	-0.868059	-0.824552
D3ZNU1	CCAAT/enhancer-binding protein zeta OS=Rattus norvegicus OX=10116 GN=Cebpz PE=1 SV=1 - [D3ZNU1_RAT]	12	26	-0.617846	-0.51797	-0.234806	-0.166452	0.105435	0.336453	0.42897	0.491349
F1M3G7	A-kinase anchor protein 13 OS=Rattus norvegicus OX=10116 GN=Akap13 PE=1 SV=2 - [AKP13_RAT]	13	26	-0.216116	-0.417632	-0.484034	-0.420574	-0.556736	-0.493612	-0.299983	-0.384983
B2RZD4	60S ribosomal protein L34 OS=Rattus norvegicus OX=10116 GN=Rpl34 PE=1 SV=1 - [B2RZD4_RAT]	4	20	-0.679641	0.115504	-0.437485	-0.656762	-0.692552	-0.821399	-0.768963	-0.763882
A0A0G2K531	Glutathione peroxidase OS=Rattus norvegicus OX=10116 GN=Gpx3 PE=1 SV=1 - [A0A0G2K531_RAT]	4	9	-0.481105	-0.568646	0.124984	-0.123933	0.278763	0.651114	0.658731	0.485583
A0A0G2K1E5	Symplekin OS=Rattus norvegicus OX=10116 GN=Sympk PE=1 SV=1 - [A0A0G2K1E5_RAT]	9	21	-0.152023	-0.355079	-0.119302	-0.0116536	0.170419	0.243173	0.498994	0.460654
B3DMA1	Ataxin 2-like OS=Rattus norvegicus OX=10116 GN=Atxn2l PE=1 SV=1 - [B3DMA1_RAT]	17	43	0.268788	0.121919	-0.287021	-0.0815061	-0.243103	-0.410088	-0.470173	-0.345557
Q68FR9	Elongation factor 1-delta OS=Rattus norvegicus OX=10116 GN=Eef1d PE=1 SV=2 - [EF1D_RAT]	17	125	0.378519	0.0653632	-0.162398	0.00522502	-0.202379	-0.354349	-0.345503	-0.392013
Q6AY97	Coiled-coil domain-containing protein 91 OS=Rattus norvegicus OX=10116 GN=Ccdc91 PE=1 SV=1 - [CCD91_RAT]	6	12	0.169511	0.0114426	-0.523974	-0.366673	-0.359656	-0.586878	-0.624695	-0.543208
D3ZU83	ERGIC and golgi 3 OS=Rattus norvegicus OX=10116 GN=Ergic3 PE=1 SV=1 - [D3ZU83_RAT]	7	20	0.115164	0.417686	0.395845	0.106229	0.298749	0.519479	0.46609	0.382392
F1M8K0	Dystroglycan 1 OS=Rattus norvegicus OX=10116 GN=Dag1 PE=1 SV=1 - [F1M8K0_RAT]	13	51	-0.0558289	0.157665	0.138881	-0.0163775	-0.195744	-0.117337	-0.281893	-0.257279
M0RC65	Cofilin 2 OS=Rattus norvegicus OX=10116 GN=Cfl2 PE=1 SV=1 - [M0RC65_RAT]	10	73	-1.42276	-0.160691	-0.695585	-0.819655	-0.931459	-1.03416	-1.10379	-1.13541
Q4FZT0	Stomatin-like protein 2, mitochondrial OS=Rattus norvegicus OX=10116 GN=Stoml2 PE=1 SV=1 - [STML2_RAT]	9	36	0.364793	0.526762	0.393734	0.0915927	0.105063	0.124544	0.146863	0.167821
P97524	Very long-chain acyl-CoA synthetase OS=Rattus norvegicus OX=10116 GN=Slc27a2 PE=1 SV=1 - [S27A2_RAT]	23	71	-0.657243	6.37044e-05	-0.0126288	-0.52634	-0.598855	-0.497994	-0.505405	-0.567072
D4AEL2	Golgi membrane protein 1 OS=Rattus norvegicus OX=10116 GN=Golm1 PE=1 SV=2 - [D4AEL2_RAT]	10	16	0.417614	0.239227	0.229511	0.368327	0.349041	0.250402	0.282013	0.213432
D3ZNG0	Adhesion G protein-coupled receptor L2 OS=Rattus norvegicus OX=10116 GN=Adgrl2 PE=1 SV=4 - [D3ZNG0_RAT]	9	16	0.632259	0.527325	0.898501	0.722696	0.338226	0.241265	0.275585	0.308755
A0A096MIZ1	Paralemmin 2 OS=Rattus norvegicus OX=10116 GN=Palm2 PE=1 SV=1 - [A0A096MIZ1_RAT]	6	17	-0.714812	-0.408956	-0.148642	-0.779418	-0.70162	-0.571509	-0.907097	-0.809332
P70617	Ninjurin-1 OS=Rattus norvegicus OX=10116 GN=Ninj1 PE=1 SV=1 - [NINJ1_RAT]	1	2	0.733749	0.623344	0.956893	0.293518	0.0705624	0.475006	0.464516	0.544974
Q6IUU3	Sulfhydryl oxidase 1 OS=Rattus norvegicus OX=10116 GN=Qsox1 PE=1 SV=1 - [QSOX1_RAT]	3	3	0.105956	-0.354841	0.290177	-0.14676	0.297658	0.589608	0.513585	0.451774
D4AD05	Ciliary rootlet coiled-coil, rootletin OS=Rattus norvegicus OX=10116 GN=Crocc PE=1 SV=2 - [D4AD05_RAT]	23	49	-0.0369885	-0.0470086	0.05249	0.208654	0.276569	0.342579	0.457858	0.462855
A0A0G2K2Z2	Inositol polyphosphate-5-phosphatase K OS=Rattus norvegicus OX=10116 GN=Inpp5k PE=1 SV=1 - [A0A0G2K2Z2_RAT]	3	4	0.0913114	-0.00322023	0.5891	0.312802	0.303543	0.200435	0.211516	0.593516
D3Z8F1	Villin-like OS=Rattus norvegicus OX=10116 GN=Vill PE=1 SV=2 - [D3Z8F1_RAT]	2	3	0.296204	0.285466	0.328906	0.604307	0.622526	0.417418	0.399278	0.206065
D4A7H1	Sodium/hydrogen exchanger OS=Rattus norvegicus OX=10116 GN=Slc9a9 PE=1 SV=2 - [D4A7H1_RAT]	1	2	0.732378	1.04206	1.03822	0.927868	0.814135	0.586693	0.385649	0.381058
D3ZA84	Talin 2 OS=Rattus norvegicus OX=10116 GN=Tln2 PE=1 SV=3 - [D3ZA84_RAT]	38	131	-0.0455936	0.430447	0.257639	0.0842307	0.431532	0.559458	0.575843	0.503796
D3ZFK5	RCG42279 OS=Rattus norvegicus OX=10116 GN=Spcs1 PE=1 SV=3 - [D3ZFK5_RAT]	2	7	-0.538391	0.102405	0.042073	-0.117633	-0.239548	-0.282711	-0.180452	-0.218296
M0R686	Immunity-related GTPase Q OS=Rattus norvegicus OX=10116 GN=Irgq PE=1 SV=2 - [M0R686_RAT]	2	2	-0.142847	-0.00455106	-0.296406	-0.422587	-0.351153	-0.394634	-0.616712	-0.573386
B0K010	Thioredoxin domain-containing 17 OS=Rattus norvegicus OX=10116 GN=Txndc17 PE=1 SV=1 - [B0K010_RAT]	2	4	0.115576	0.073154	-0.269173	0.0498667	-0.374057	-0.473006	-0.702916	-0.691749
Q7M0B2	Peptidyl-prolyl cis-trans isomerase (Fragments) OS=Rattus norvegicus OX=10116 PE=3 SV=1 - [Q7M0B2_RAT]	1	10	0.230223	0.194923	0.0247799	-0.0405266	-0.229796	-0.255871	-0.22932	-0.241425
D4ACW1	NOP2 nucleolar protein OS=Rattus norvegicus OX=10116 GN=Nop2 PE=1 SV=2 - [D4ACW1_RAT]	14	35	-0.48895	-0.323777	-0.141532	-0.0320185	0.390256	0.420604	0.330518	0.255396
P14056	Serine/threonine-protein kinase A-Raf OS=Rattus norvegicus OX=10116 GN=Araf PE=1 SV=1 - [ARAF_RAT]	4	5	-0.420477	-0.366817	0.22231	-0.830382	-0.751131	-0.417437	-0.47566	-0.769633
P09811	Glycogen phosphorylase, liver form OS=Rattus norvegicus OX=10116 GN=Pygl PE=1 SV=5 - [PYGL_RAT]	24	70	-0.269825	-0.385965	-0.712398	-1.11538	-0.897548	-0.747518	-0.805821	-0.667896
P15337	Cyclic AMP-responsive element-binding protein 1 OS=Rattus norvegicus OX=10116 GN=Creb1 PE=1 SV=1 - [CREB1_RAT]	6	23	-0.525902	-0.548291	-0.133373	0.163141	-0.123042	-0.267026	-0.364197	-0.381583
A0A096MJ99	Vesicle-associated membrane protein 4 OS=Rattus norvegicus OX=10116 GN=Vamp4 PE=1 SV=1 - [A0A096MJ99_RAT]	3	6	0.157383	0.304447	0.274082	0.138304	0.377167	0.618774	0.501323	0.435465
A0A0G2JVV5	Ubiquitin-specific peptidase 14 OS=Rattus norvegicus OX=10116 GN=Usp14 PE=1 SV=1 - [A0A0G2JVV5_RAT]	9	24	-0.0546771	-0.000645388	-0.532509	-0.512267	-0.326337	-0.248942	-0.300123	-0.223236
Q6AXW0	Borealin OS=Rattus norvegicus OX=10116 GN=Cdca8 PE=1 SV=1 - [BOREA_RAT]	2	3	0.16487	-0.300475	0.207945	0.566561	0.285869	0.193649	0.241604	0.200792
A0A0G2K064	Tyrosine-protein phosphatase non-receptor type OS=Rattus norvegicus OX=10116 GN=Ptpn6 PE=1 SV=1 - [A0A0G2K064_RAT]	7	14	0.043324	-0.00623649	-0.132389	-0.0513411	0.115684	0.137375	0.268204	0.270529
P43428	Glucose-6-phosphatase OS=Rattus norvegicus OX=10116 GN=G6pc PE=2 SV=1 - [G6PC_RAT]	2	3	-0.245048	-0.222032	-0.229127	-0.415964	-0.451616	-0.517329	-0.362524	-0.659628
G3V644	NADH dehydrogenase (Ubiquinone) flavoprotein 3-like, isoform CRA_a OS=Rattus norvegicus OX=10116 GN=Ndufv3 PE=1 SV=1 - [G3V644_RAT]	15	47	-0.706915	-0.443344	-0.921455	-0.569112	-0.565096	-0.789129	-0.72401	-0.963394
P01015	Angiotensinogen OS=Rattus norvegicus OX=10116 GN=Agt PE=1 SV=1 - [ANGT_RAT]	7	15	-0.867202	-1.43302	-0.454355	-0.92308	-1.04187	-0.970963	-0.943004	-0.873542
P0C0A9	Small VCP/p97-interacting protein OS=Rattus norvegicus OX=10116 GN=Svip PE=1 SV=1 - [SVIP_RAT]	2	6	0.363309	0.27852	0.605668	0.623905	0.408105	0.621933	0.78591	0.567707
D4A259	Polymerase (RNA) II (DNA directed) polypeptide D (Predicted) OS=Rattus norvegicus OX=10116 GN=Polr2d PE=1 SV=1 - [D4A259_RAT]	2	4	0.323413	-0.19523	0.376132	0.545692	0.349357	0.32111	0.265681	0.341613
D3ZUM5	Tripartite motif-containing 33 OS=Rattus norvegicus OX=10116 GN=Trim33 PE=1 SV=3 - [D3ZUM5_RAT]	2	10	-0.572938	-0.770121	-0.566747	-0.135793	-0.590034	-0.617907	-0.807671	-0.98627
Q66H43	BLOC-1-related complex subunit 6 OS=Rattus norvegicus OX=10116 GN=Borcs6 PE=2 SV=2 - [BORC6_RAT]	1	2	0.526018	0.277084	0.164013	0.0159964	0.18521	0.366155	0.386902	0.428323
D4A5K9	Glycogen [starch] synthase OS=Rattus norvegicus OX=10116 GN=Gys2 PE=1 SV=2 - [D4A5K9_RAT]	8	12	-0.661387	0.00728264	-0.870496	-1.28717	-1.37662	-1.14443	-1.16425	-1.2111
Q5XI86	Peptidyl-tRNA hydrolase 2 OS=Rattus norvegicus OX=10116 GN=Ptrh2 PE=1 SV=1 - [Q5XI86_RAT]	5	8	0.301576	0.378543	0.366775	0.551705	0.364969	0.288182	0.258041	0.25344
A0A0G2K6D0	Lysine demethylase 6A OS=Rattus norvegicus OX=10116 GN=Kdm6a PE=1 SV=1 - [A0A0G2K6D0_RAT]	2	2	-3.10809		-0.503882		-3.08746	-3.56784	-2.82699	-3.65031
G3V7V5	Peptidylprolyl isomerase OS=Rattus norvegicus OX=10116 GN=Fkbp11 PE=1 SV=1 - [G3V7V5_RAT]	2	7	-0.470895	0.19194	-0.108798	-0.148903	-0.324955	-0.390246	-0.371149	-0.34471
D4A5X2	Family with sequence similarity 229, member A OS=Rattus norvegicus OX=10116 GN=Fam229a PE=4 SV=1 - [D4A5X2_RAT]	1	1	-1.3794	-1.69972	-1.256	-1.11339	-0.836552	-0.64778	-0.765278	-0.493759
P07943	Aldose reductase OS=Rattus norvegicus OX=10116 GN=Akr1b1 PE=1 SV=3 - [ALDR_RAT]	8	26	-0.382583	-0.436793	-0.476778	-0.290098	-0.384328	-0.609185	-0.548321	-0.507109
Q5I0M1	Apolipoprotein H OS=Rattus norvegicus OX=10116 GN=Apoh PE=1 SV=1 - [Q5I0M1_RAT]	20	179	0.274242	-0.1912	-0.00621557	0.2438	0.471452	0.622624	0.467801	0.432168
G3V6J2	O-acyltransferase OS=Rattus norvegicus OX=10116 GN=Soat1 PE=3 SV=1 - [G3V6J2_RAT]	1	4	0.140589	0.38739	0.408078	0.230282	0.109734	0.233054	0.118915	0.177429
F8WFN1	Selenoprotein T OS=Rattus norvegicus OX=10116 GN=Selenot PE=1 SV=1 - [F8WFN1_RAT]	3	8	0.225572	0.346073	0.393992	0.0185737	0.199872	0.369903	0.450696	0.359318
A0A0G2K1Q9	Erythrocyte membrane protein band 4.1-like 3 OS=Rattus norvegicus OX=10116 GN=Epb41l3 PE=1 SV=1 - [A0A0G2K1Q9_RAT]	8	28	-0.127749	0.163882	-0.108929	-0.172966	-0.397258	-0.305258	-0.308139	-0.315438
Q7TQ16	Cytochrome b-c1 complex subunit 8 OS=Rattus norvegicus OX=10116 GN=Uqcrq PE=3 SV=1 - [QCR8_RAT]	5	17	-0.448478	-0.0324842	-0.147655	-0.383043	-0.335161	-0.299952	-0.413176	-0.3858
A0A0G2JTX5	Dipeptidyl peptidase 4 OS=Rattus norvegicus OX=10116 GN=Dpp4 PE=1 SV=1 - [A0A0G2JTX5_RAT]	17	43	-0.213662	-0.28125	-0.145267	-0.327807	0.130721	0.484606	0.566556	0.5297
Q5XIA2	SUZ domain-containing protein 1 OS=Rattus norvegicus OX=10116 GN=Szrd1 PE=1 SV=2 - [SZRD1_RAT]	1	2	-1.05412	-0.919052	-0.703365	-0.712628	-1.12706	-0.712676	-0.503611	-1.01605
B2RZ47	Exosc5 protein (Fragment) OS=Rattus norvegicus OX=10116 GN=Exosc5 PE=2 SV=1 - [B2RZ47_RAT]	2	3	0.282115	0.27623	0.0558035	0.038039	0.467572	0.67944	0.671194	0.588941
A0A0G2JVW1	Insulin-like growth factor-binding protein 5 OS=Rattus norvegicus OX=10116 GN=Igfbp5 PE=4 SV=1 - [A0A0G2JVW1_RAT]	1	1	-1.09252	-1.52502	-1.49325	-1.09707	-0.957911	-1.22662	-1.43323	-0.949067
D4A1R8	Copine-1 OS=Rattus norvegicus OX=10116 GN=Cpne1 PE=1 SV=1 - [CPNE1_RAT]	9	18	0.206774	-0.094652	-0.0599146	-0.17405	0.124988	0.336717	0.292906	0.358565
P06766	DNA polymerase beta OS=Rattus norvegicus OX=10116 GN=Polb PE=1 SV=4 - [DPOLB_RAT]	4	7	-0.375868	-0.630509	-0.246815	-0.319244	-0.322594	-0.174321	-0.391099	-0.508423
Q5M862	Coiled-coil domain-containing protein 134 OS=Rattus norvegicus OX=10116 GN=Ccdc134 PE=2 SV=1 - [CC134_RAT]	4	7	0.491032	0.735551	0.798171	0.550885	0.164329	0.222468	0.273825	0.320461
A0A0G2K013	Alpha-actinin-4 OS=Rattus norvegicus OX=10116 GN=Actn4 PE=1 SV=1 - [A0A0G2K013_RAT]	1	553	0.722497	0.380542	0.634646	0.593534	0.424804	0.197198	0.448098	0.474991
P12785	Fatty acid synthase OS=Rattus norvegicus OX=10116 GN=Fasn PE=1 SV=3 - [FAS_RAT]	37	80	-0.608228	0.0134407	-0.325759	-0.556692	-0.626441	-0.560525	-0.551096	-0.518265
P13668	Stathmin OS=Rattus norvegicus OX=10116 GN=Stmn1 PE=1 SV=2 - [STMN1_RAT]	10	38	-0.331828	-0.41111	-0.838533	-0.382393	-0.686124	-0.842531	-0.932962	-0.883143
P02454	Collagen alpha-1(I) chain OS=Rattus norvegicus OX=10116 GN=Col1a1 PE=1 SV=5 - [CO1A1_RAT]	46	906	-1.26884	-1.09445	-0.784384	-1.01327	-0.740929	-0.573627	-0.587076	-0.569842
D3ZAQ6	Nucleolar protein 7 OS=Rattus norvegicus OX=10116 GN=Nol7 PE=1 SV=3 - [D3ZAQ6_RAT]	4	7	-0.641022	-0.231191	-0.234833	0.120697	-0.196742	-0.367632	-0.486064	-0.364293
Q5EAN7	Telomeric repeat-binding factor 2-interacting protein 1 OS=Rattus norvegicus OX=10116 GN=Terf2ip PE=1 SV=1 - [TE2IP_RAT]	5	14	0.220691	0.0389221	0.165032	0.429138	0.306099	0.348061	0.413488	0.313807
Q641Z6	EH domain-containing protein 1 OS=Rattus norvegicus OX=10116 GN=Ehd1 PE=1 SV=1 - [EHD1_RAT]	11	70	0.445676	0.0447543	0.00106373	0.0392925	0.111984	0.261561	0.211828	0.314307
Q5I0L4	Cytosolic Fe-S cluster assembly factor NUBP1 OS=Rattus norvegicus OX=10116 GN=Nubp1 PE=1 SV=1 - [NUBP1_RAT]	2	4	0.695848	0.59605	0.203454	0.743523	0.686524	0.279292	0.433493	0.475053
B5DF91	ELAV-like protein 1 OS=Rattus norvegicus OX=10116 GN=Elavl1 PE=1 SV=1 - [ELAV1_RAT]	9	35	1.01584	0.939732	0.51925	0.741579	0.491224	0.237095	0.278524	0.217501
Q9QX80	CArG-binding factor A OS=Rattus norvegicus OX=10116 GN=Hnrnpab PE=1 SV=1 - [Q9QX80_RAT]	13	68	-0.0271442	0.233473	-0.521702	0.0966225	-0.267016	-0.654477	-0.722699	-0.749172
D3ZJR1	Epidermal growth factor receptor pathway substrate 15-like 1 OS=Rattus norvegicus OX=10116 GN=Eps15l1 PE=1 SV=3 - [D3ZJR1_RAT]	1	55	0.0263421	-0.170483	-0.433902	-0.272753	-0.541426	-0.647165	-0.657877	-0.408933
Q63524	Transmembrane emp24 domain-containing protein 2 OS=Rattus norvegicus OX=10116 GN=Tmed2 PE=1 SV=1 - [TMED2_RAT]	3	12	0.072596	0.230209	0.201074	0.123658	0.348439	0.410248	0.456416	0.277297
F1LRV4	Heat shock 70 kDa protein 4 OS=Rattus norvegicus OX=10116 GN=Hspa4 PE=1 SV=1 - [F1LRV4_RAT]	30	103	0.190462	0.194335	-0.143857	-0.206378	-0.212571	-0.138302	-0.132655	-0.18668
O35244	Peroxiredoxin-6 OS=Rattus norvegicus OX=10116 GN=Prdx6 PE=1 SV=3 - [PRDX6_RAT]	9	72	0.28562	-0.0701851	-0.240841	0.0266784	-0.275039	-0.501812	-0.457618	-0.537142
Q6MG75	Negative elongation factor complex member E OS=Rattus norvegicus OX=10116 GN=Nelfe PE=1 SV=1 - [Q6MG75_RAT]	7	18	-0.216696	-0.322985	-0.384489	-0.14223	-0.261903	-0.363396	-0.454566	-0.507989
D3ZQK8	Lymphocyte antigen 75 OS=Rattus norvegicus OX=10116 GN=Ly75 PE=4 SV=3 - [D3ZQK8_RAT]	10	14	0.37012	0.193995	0.48499	0.658946	0.49822	0.408828	0.38851	0.511642
P02262	Histone H2A type 1 OS=Rattus norvegicus OX=10116 PE=1 SV=2 - [H2A1_RAT]	1	1962	0.544114	0.377699	0.993495	0.990372	0.926144	0.887243	0.596227	0.752861
A0A0G2K9N0	Small ArfGAP2 OS=Rattus norvegicus OX=10116 GN=Smap2 PE=1 SV=1 - [A0A0G2K9N0_RAT]	3	5	-0.0502651	-0.428977	-0.769281	-0.211659	-0.392842	-0.424412	-0.562968	-0.427898
A0A0G2JVY2	CD163 molecule OS=Rattus norvegicus OX=10116 GN=Cd163 PE=1 SV=1 - [A0A0G2JVY2_RAT]	16	39	0.290277	0.0971743	0.455573	0.235536	-0.23012	-0.15812	-0.242057	-0.211678
Q4KLI7	Splicing factor 3a, subunit 3 OS=Rattus norvegicus OX=10116 GN=Sf3a3 PE=1 SV=1 - [Q4KLI7_RAT]	11	62	0.00896534	-0.0146925	-0.0774998	0.378869	0.445038	0.394244	0.297936	0.340514
D3ZUT9	Integrator complex subunit 3 OS=Rattus norvegicus OX=10116 GN=Ints3 PE=1 SV=1 - [D3ZUT9_RAT]	8	22	-0.08589	0.0106717	0.145532	0.0670635	0.172775	0.266509	0.207269	0.228642
A0A0G2K315	Uncharacterized protein OS=Rattus norvegicus OX=10116 GN=Cep170 PE=1 SV=1 - [A0A0G2K315_RAT]	7	14	-0.19395	-0.182943	-0.262888	-0.163773	-0.196682	-0.39045	-0.417611	-0.367737
P52759	2-iminobutanoate/2-iminopropanoate deaminase OS=Rattus norvegicus OX=10116 GN=Rida PE=1 SV=3 - [RIDA_RAT]	7	211	0.0746948	-0.399755	-0.63417	-0.44662	-0.576768	-0.66379	-0.618023	-0.624953
P84100	60S ribosomal protein L19 OS=Rattus norvegicus OX=10116 GN=Rpl19 PE=1 SV=1 - [RL19_RAT]	6	29	-0.763139	0.0899476	-0.357476	-0.666807	-0.574606	-0.638809	-0.750343	-0.723919
D3ZD31	Mannose receptor, C type 1 OS=Rattus norvegicus OX=10116 GN=Mrc1 PE=1 SV=3 - [D3ZD31_RAT]	26	61	0.373606	0.665518	0.696838	0.356625	0.3842	0.449538	0.372693	0.38305
B1WC88	UPF0729 protein C18orf32 homolog OS=Rattus norvegicus OX=10116 PE=3 SV=1 - [CR032_RAT]	3	13	0.293271	0.673411	0.433254	0.521658	0.225899	0.219718	0.137776	0.231591
D4AEL8	5-azacytidine induced gene 1 (Predicted), isoform CRA_a OS=Rattus norvegicus OX=10116 GN=Cep131 PE=1 SV=1 - [D4AEL8_RAT]	13	20	-0.190974	-0.136101	-0.137953	-0.0470699	0.18986	0.350432	0.375014	0.385277
D4A2F1	Agrin OS=Rattus norvegicus OX=10116 GN=Agrn PE=1 SV=2 - [D4A2F1_RAT]	18	38	0.0789894	-0.172323	0.297137	0.163584	0.252753	0.353222	0.325556	0.417527
B5DEP4	28S ribosomal protein L42, mitochondrial OS=Rattus norvegicus OX=10116 GN=Mrpl42 PE=1 SV=1 - [B5DEP4_RAT]	3	9	0.0561109	0.35147	-0.150463	-0.140416	-0.182954	-0.239382	-0.268346	-0.243125
M0RCJ9	Protein MAL2-like OS=Rattus norvegicus OX=10116 GN=LOC100911027 PE=4 SV=2 - [M0RCJ9_RAT]	1	2	-0.134021	0.00767096	0.163934	-0.132414	0.399652	0.554234	0.521042	0.514359
B1H257	BLOC-1-related complex subunit 5 OS=Rattus norvegicus OX=10116 GN=Borcs5 PE=1 SV=1 - [B1H257_RAT]	1	3	0.260783	0.191475	-0.0105864	0.200928	0.432881	0.546558	0.583122	0.335473
A0A0G2KAN1	Collagen, type I, alpha 2 OS=Rattus norvegicus OX=10116 GN=NEWGENE_621351 PE=1 SV=1 - [A0A0G2KAN1_RAT]	38	278	-1.18319	-1.08387	-0.897832	-1.05024	-0.761285	-0.545614	-0.511069	-0.497544
Q2A121	Alpha-ketoglutarate-dependent dioxygenase FTO OS=Rattus norvegicus OX=10116 GN=Fto PE=2 SV=1 - [FTO_RAT]	1	1	0.729191	0.660999	0.205317	-0.951748	-1.3764	-1.31124	-0.800217	-0.827587
Q71F54	E3 ubiquitin-protein ligase SH3RF1 OS=Rattus norvegicus OX=10116 GN=Sh3rf1 PE=1 SV=1 - [SH3R1_RAT]	1	2	-0.836301	-0.621298	-0.419556	-0.435282	-0.736382	-0.407372	-0.297765	-0.797486
G3V946	AIP1, isoform CRA_a OS=Rattus norvegicus OX=10116 GN=Dpy30 PE=1 SV=1 - [G3V946_RAT]	2	6	-0.121303	-0.105921	-0.48834	-0.115556	-0.128324	-0.212749	-0.199662	-0.271311
F1LXQ8	Phosphoinositide-3-kinase adaptor protein 1 OS=Rattus norvegicus OX=10116 GN=Pik3ap1 PE=1 SV=2 - [F1LXQ8_RAT]	4	6	-0.202644	-0.404743	0.0492582	-0.517133	-0.273593	-0.271433	-0.17578	-0.219284
G3V6D3	ATP synthase subunit beta OS=Rattus norvegicus OX=10116 GN=Atp5f1b PE=1 SV=1 - [G3V6D3_RAT]	29	1089	0.634136	0.220383	0.476031	0.259418	0.0854279	0.14044	0.154885	0.144682
Q7M0C4	Cytochrome P450 2B4 (Fragments) OS=Rattus norvegicus OX=10116 PE=4 SV=1 - [Q7M0C4_RAT]	5	18	-0.849816	-0.365981	-0.490905	-1.08398	-1.14507	-1.04586	-1.13492	-0.972901
Q5M9G3	Caprin-1 OS=Rattus norvegicus OX=10116 GN=Caprin1 PE=1 SV=2 - [CAPR1_RAT]	16	80	-0.0553611	-0.0668681	-0.630867	-0.0671852	-0.331906	-0.597634	-0.590008	-0.673352
P29288	Tartrate-resistant acid phosphatase type 5 OS=Rattus norvegicus OX=10116 GN=Acp5 PE=1 SV=1 - [PPA5_RAT]	2	6	-0.176155	-0.281716	-0.0965554	-0.17228	-0.353773	-0.455412	-0.455836	-0.327731
Q5PQK2	FUS RNA-binding protein OS=Rattus norvegicus OX=10116 GN=Fus PE=1 SV=1 - [Q5PQK2_RAT]	9	116	-0.606952	-0.217094	-0.802979	-0.169027	-0.381889	-0.614865	-0.64027	-0.77356
P11030	Acyl-CoA-binding protein OS=Rattus norvegicus OX=10116 GN=Dbi PE=1 SV=3 - [ACBP_RAT]	7	159	0.0383474	-0.0906794	-0.398039	-0.039159	-0.43249	-0.712487	-0.752705	-0.892672
P61459	Pterin-4-alpha-carbinolamine dehydratase OS=Rattus norvegicus OX=10116 GN=Pcbd1 PE=1 SV=2 - [PHS_RAT]	6	62	0.0862125	-0.236982	-0.320741	-0.16915	-0.499081	-0.636081	-0.634395	-0.620724
D4A7Q6	Zinc finger protein 428 OS=Rattus norvegicus OX=10116 GN=Zfp428 PE=4 SV=2 - [D4A7Q6_RAT]	1	2	-1.50302	-1.24969	-1.1774		-1.12651	-0.972798	-1.29269	-1.03255
Q63569	26S proteasome regulatory subunit 6A OS=Rattus norvegicus OX=10116 GN=Psmc3 PE=1 SV=1 - [PRS6A_RAT]	19	52	0.266455	0.114711	-0.118463	-0.0501773	-0.117464	-0.109168	-0.0599494	-0.13741
D3Z9E1	Elastin microfibril interfacer 1 OS=Rattus norvegicus OX=10116 GN=Emilin1 PE=1 SV=1 - [D3Z9E1_RAT]	29	154	-0.11585	-0.202612	0.389524	0.17521	0.299934	0.600219	0.533195	0.520094
A0A0G2K9A9	F-box protein 41 OS=Rattus norvegicus OX=10116 GN=Fbxo41 PE=1 SV=1 - [A0A0G2K9A9_RAT]	1	2	-0.410437	-0.780558	-0.528896	0.120475	-0.377025	-0.600347	-0.826846	-0.609573
D3ZEP5	Uncharacterized protein OS=Rattus norvegicus OX=10116 PE=1 SV=3 - [D3ZEP5_RAT]	1	4	-0.303243	-0.647901	-1.53795	-0.991298	-0.590711	-1.69717	-1.60676	-1.44096
Q6PEC1	Tubulin-specific chaperone A OS=Rattus norvegicus OX=10116 GN=Tbca PE=1 SV=1 - [TBCA_RAT]	7	24	0.0886671	-0.0636944	-0.485712	-0.0985521	-0.359961	-0.554865	-0.601394	-0.604602
A0A0G2K654	Histone cluster 1 H1 family member c OS=Rattus norvegicus OX=10116 GN=Hist1h1c PE=1 SV=1 - [A0A0G2K654_RAT]	3	494	-1.90242	-0.864846	-0.532788	-0.803281	-0.797407	-0.707303	-0.80608	-0.749949
A1L1L5	Ccnk protein OS=Rattus norvegicus OX=10116 GN=Ccnk PE=1 SV=1 - [A1L1L5_RAT]	5	11	0.262946	0.115512	0.233054	0.308395	0.438429	0.4814	0.433414	0.280255
Q9BCZ6	RT1.D beta class II major histocompatibility antigen (Fragment) OS=Rattus norvegicus OX=10116 PE=2 SV=1 - [Q9BCZ6_RAT]	1	1	0.307848	0.244852	0.208136	-0.263484	0.192435	0.540035	0.498726	0.557018
E9PU78	Uncharacterized protein OS=Rattus norvegicus OX=10116 PE=4 SV=1 - [E9PU78_RAT]	2	6	0.625219	0.227641	0.555736	0.313941	0.31212	0.346409	0.221085	0.303123
Q5FVL9	Fam103a1 protein OS=Rattus norvegicus OX=10116 GN=Fam103a1 PE=2 SV=1 - [Q5FVL9_RAT]	2	5	-0.144039	-0.348268	-0.935038	-0.164083	-0.434208	-0.385825	-0.728413	-0.585405
D4A9D6	DEAH (Asp-Glu-Ala-His) box polypeptide 9 (Predicted) OS=Rattus norvegicus OX=10116 GN=Dhx9 PE=1 SV=1 - [D4A9D6_RAT]	22	54	-0.303018	-0.020962	-0.149157	-0.21395	0.294959	0.46207	0.411212	0.456058
Q9JHZ4	GRIP1-associated protein 1 OS=Rattus norvegicus OX=10116 GN=Gripap1 PE=1 SV=1 - [GRAP1_RAT]	17	36	0.270385	0.114301	-0.30536	-0.135407	-0.373229	-0.416543	-0.400055	-0.392785
A0A0G2KAE4	Sulfhydryl oxidase OS=Rattus norvegicus OX=10116 GN=LOC100912596 PE=4 SV=1 - [A0A0G2KAE4_RAT]	2	5	-0.0149172	0.248712	-0.247216	0.0586053	-0.397863	-0.83057	-0.76789	-0.765783
P21743	Insulin-like growth factor-binding protein 1 OS=Rattus norvegicus OX=10116 GN=Igfbp1 PE=1 SV=2 - [IBP1_RAT]	6	34	0.888545	0.931142	0.687634	0.519566	0.503512	0.538535	0.362817	0.573247
D3ZVR9	Phosphoglucomutase 5 OS=Rattus norvegicus OX=10116 GN=Pgm5 PE=1 SV=3 - [D3ZVR9_RAT]	6	10	-0.501835	-0.564298	-0.469851	-0.507297	-0.666439	-0.766885	-0.546992	-0.60899
A0A0G2JSJ3	Solute carrier family 2 (Facilitated glucose transporter), member 3 OS=Rattus norvegicus OX=10116 GN=Slc2a3 PE=1 SV=1 - [A0A0G2JSJ3_RAT]	5	18	0.358477	0.337639	0.221739	-0.712794	0.361521	0.956407	0.854669	0.81681
A0A0G2JZ30	Family with sequence similarity 76, member A OS=Rattus norvegicus OX=10116 GN=Fam76a PE=4 SV=1 - [A0A0G2JZ30_RAT]	1	2	-0.570419	-0.65401	-0.618293	-0.264949	-0.419744	-0.548203	-0.594783	-0.386968
D3ZU55	Forkhead box K1 OS=Rattus norvegicus OX=10116 GN=Foxk1 PE=1 SV=2 - [D3ZU55_RAT]	3	5	-0.059098	-0.153359	-0.231352	0.0248787	-0.181308	-0.346465	-0.432472	-0.279788
P54311	Guanine nucleotide-binding protein G(I)/G(S)/G(T) subunit beta-1 OS=Rattus norvegicus OX=10116 GN=Gnb1 PE=1 SV=4 - [GBB1_RAT]	3	26	0.163029	0.174355	0.524196	0.304436	0.227785	0.467533	0.434951	0.440989
F1M0P3	UAP56-interacting factor OS=Rattus norvegicus OX=10116 GN=Fyttd1 PE=1 SV=2 - [F1M0P3_RAT]	1	5	-0.386114	0.279173	0.589934	0.471449	0.78386	0.978985	0.523259	0.407065
A0A0G2K9V6	Threonine--tRNA ligase, cytoplasmic OS=Rattus norvegicus OX=10116 GN=Tars PE=1 SV=1 - [A0A0G2K9V6_RAT]	15	37	-0.109249	-0.218351	-0.384102	-0.079466	-0.193256	-0.450046	-0.558689	-0.539878
D3ZUI1	Methylthioribulose-1-phosphate dehydratase OS=Rattus norvegicus OX=10116 GN=Apip PE=1 SV=3 - [D3ZUI1_RAT]	4	7	0.0966408	-0.095782	-0.237315	-0.513417	-0.388132	-0.416472	-0.384053	-0.203401
D4A6X4	Acylphosphatase OS=Rattus norvegicus OX=10116 GN=Acyp1 PE=1 SV=1 - [D4A6X4_RAT]	2	2	0.236577	0.0728145	-0.410272	0.153134	-0.52601	-1.18444	-1.27521	-0.656512
A9UMW2	Ndufa3 protein (Fragment) OS=Rattus norvegicus OX=10116 GN=Ndufa3 PE=2 SV=1 - [A9UMW2_RAT]	1	6	-0.232831	0.00297852	-0.0825138	-0.279363	-0.328096	-0.282468	-0.235574	-0.348855
Q63377	Sodium/potassium-transporting ATPase subunit beta-3 OS=Rattus norvegicus OX=10116 GN=Atp1b3 PE=2 SV=1 - [AT1B3_RAT]	3	6	-0.0924802	0.341249	0.656457	0.0203219	0.385079	0.82661	0.723461	0.664511
G3V686	Resistin-like gamma OS=Rattus norvegicus OX=10116 GN=Retnlg PE=2 SV=1 - [RETNG_RAT]	2	6	-0.057226	-0.311493	0.145663	0.303513	0.669033	0.788806	0.433627	0.604623
Q63011	Zero beta-globin (Fragment) OS=Rattus norvegicus OX=10116 PE=3 SV=1 - [Q63011_RAT]	3	632	0.971432	-0.0180161	-0.101524	0.104859	0.372979	0.629872	0.677719	0.671539
F1LQN3	Reticulon OS=Rattus norvegicus OX=10116 GN=Rtn4 PE=1 SV=1 - [F1LQN3_RAT]	13	69	-0.329605	0.195302	-0.0804366	-0.359199	-0.389836	-0.346379	-0.406236	-0.414674
F1LNH3	Collagen type VI alpha 2 chain OS=Rattus norvegicus OX=10116 GN=Col6a2 PE=1 SV=2 - [F1LNH3_RAT]	21	100	-0.422876	-0.429247	-0.0780308	-0.555137	0.264568	0.873638	0.848039	0.771253
A0A0G2JW85	Ras GTPase-activating protein 3 OS=Rattus norvegicus OX=10116 GN=Rasa3 PE=1 SV=1 - [A0A0G2JW85_RAT]	5	6	-0.0487526	-0.0583347	-0.12509	-0.154035	0.262929	0.177411	0.224208	0.229845
B0BNC7	Armadillo repeat-containing 12 OS=Rattus norvegicus OX=10116 GN=Armc12 PE=1 SV=1 - [B0BNC7_RAT]	1	1	0.8767	0.71086	0.46446	0.734285	0.46937	0.337498	0.28838	0.251542
G3V803	Cadherin-2 OS=Rattus norvegicus OX=10116 GN=Cdh2 PE=1 SV=1 - [G3V803_RAT]	15	77	0.245617	0.232052	0.600063	0.599934	0.523806	0.414661	0.330399	0.40793
P84903	Stromal interaction molecule 1 OS=Rattus norvegicus OX=10116 GN=Stim1 PE=1 SV=1 - [STIM1_RAT]	10	23	0.303723	0.219338	0.405555	0.220348	0.317256	0.405831	0.480462	0.440556
D4A904	N-acetylglutamate synthase OS=Rattus norvegicus OX=10116 GN=Nags PE=1 SV=1 - [D4A904_RAT]	1	1	1.48282	0.397357	0.934889	0.672408	0.783086	0.919556	1.06535	1.08821
M0R9T2	Erbb2-interacting protein OS=Rattus norvegicus OX=10116 GN=Erbin PE=1 SV=2 - [M0R9T2_RAT]	15	36	0.427021	0.484782	0.431727	0.328606	0.385149	0.436167	0.232462	0.387466
A0A0G2K0Q7	Myosin light chain kinase OS=Rattus norvegicus OX=10116 GN=Mylk PE=1 SV=1 - [A0A0G2K0Q7_RAT]	24	66	-1.07386	-1.06222	-1.08159	-0.788161	-0.874387	-0.818952	-0.865438	-0.812127
F1LQ00	Collagen type V alpha 2 chain OS=Rattus norvegicus OX=10116 GN=Col5a2 PE=1 SV=3 - [F1LQ00_RAT]	14	60	-1.03708	-1.05559	-0.76158	-0.698973	-0.424708	-0.254105	-0.328796	-0.332096
Q38PG1	AHNAK 1 (Fragment) OS=Rattus norvegicus OX=10116 PE=2 SV=1 - [Q38PG1_RAT]	5	170	-1.03102	-0.710067	-0.596254	-0.687979	-0.382083	-0.382378	-0.416034	-0.470145
Q63942	GTP-binding protein Rab-3D OS=Rattus norvegicus OX=10116 GN=Rab3d PE=1 SV=2 - [RAB3D_RAT]	5	23	0.236018	0.654027	0.26364	0.0180793	0.366925	0.707916	0.579356	0.701399
Q5PQT2	Myotubularin-related protein 3 OS=Rattus norvegicus OX=10116 GN=Mtmr3 PE=1 SV=1 - [MTMR3_RAT]	2	4	0.940037	0.25743	0.710441	1.1796	0.620247	0.468799	0.383511	0.694678
F1LMW7	Myristoylated alanine-rich C-kinase substrate OS=Rattus norvegicus OX=10116 GN=Marcks PE=1 SV=3 - [F1LMW7_RAT]	7	123	-0.945006	-0.69559	-0.657187	-0.353601	-0.566224	-0.645726	-0.693544	-0.622214
Q5M860	Rho GDP dissociation inhibitor beta OS=Rattus norvegicus OX=10116 GN=Arhgdib PE=1 SV=1 - [Q5M860_RAT]	6	13	0.920739	0.106664	0.33895	0.462983	0.465689	0.538543	0.543397	0.449207
Q641X3	Beta-hexosaminidase subunit alpha OS=Rattus norvegicus OX=10116 GN=Hexa PE=2 SV=1 - [HEXA_RAT]	6	19	0.342896	0.0541915	0.430735	0.213813	0.211201	0.434188	0.49177	0.563446
A0A0G2JVK4	Neurolysin, mitochondrial OS=Rattus norvegicus OX=10116 GN=Nln PE=1 SV=1 - [A0A0G2JVK4_RAT]	15	26	0.798195	0.488772	0.795104	0.471837	0.377127	0.477766	0.582838	0.493667
Q68FV8	Ubiquitin domain-containing protein 1 OS=Rattus norvegicus OX=10116 GN=Ubtd1 PE=2 SV=1 - [UBTD1_RAT]	2	4	0.0626699	0.259415	0.1909	0.0201401	0.179682	0.336207	0.352001	0.384717
P27867	Sorbitol dehydrogenase OS=Rattus norvegicus OX=10116 GN=Sord PE=1 SV=4 - [DHSO_RAT]	14	43	0.473625	-0.19738	-0.347196	-0.232879	-0.469317	-0.453302	-0.460239	-0.444221
D4A0L4	Y-box-binding protein 3 OS=Rattus norvegicus OX=10116 GN=Ybx3 PE=1 SV=3 - [D4A0L4_RAT]	3	14	-0.609507	0.13215	-0.202669	-0.316883	-0.4213	-0.51737	-0.535777	-0.686768
A0A096MK06	Astrotactin 2 OS=Rattus norvegicus OX=10116 GN=Astn2 PE=4 SV=1 - [A0A096MK06_RAT]	1	1	-0.363006	-1.08314	-0.337317	0.0264693	0.660905	0.719792	0.511972	0.422642
M0R3M4	RAN-binding protein 2 OS=Rattus norvegicus OX=10116 GN=Ranbp2 PE=1 SV=1 - [M0R3M4_RAT]	70	181	0.125534	0.307021	0.436263	0.609709	0.508164	0.341857	0.375031	0.255072
P97521	Mitochondrial carnitine/acylcarnitine carrier protein OS=Rattus norvegicus OX=10116 GN=Slc25a20 PE=1 SV=1 - [MCAT_RAT]	13	27	-0.54573	0.27233	-0.295594	-0.918125	-0.639687	-0.514742	-0.569544	-0.466185
A0A0G2KAY8	Selenoprotein F OS=Rattus norvegicus OX=10116 GN=Selenof PE=1 SV=1 - [A0A0G2KAY8_RAT]	4	12	0.769909	0.332615	0.556141	0.548137	0.306363	0.241653	0.435759	0.362324
F1LQB4	Palmitoyltransferase OS=Rattus norvegicus OX=10116 GN=Zdhhc6 PE=3 SV=2 - [F1LQB4_RAT]	1	2	-0.0522129	-0.163171	0.0498623		-0.962276	-0.849271	-0.672357	-0.330133
Q6AYS9	Protein-tyrosine sulfotransferase OS=Rattus norvegicus OX=10116 GN=Tpst1 PE=1 SV=1 - [Q6AYS9_RAT]	4	11	0.290775	0.5609	0.452017	0.210645	0.354535	0.519091	0.509694	0.567682
G3V6A0	Platelet-derived growth factor receptor alpha OS=Rattus norvegicus OX=10116 GN=Pdgfra PE=1 SV=1 - [G3V6A0_RAT]	5	9	0.0903612	0.313787	0.435732	0.0914672	0.347813	0.462489	0.190541	0.372871
Q3MHS2	Zinc finger protein 830 OS=Rattus norvegicus OX=10116 GN=Znf830 PE=1 SV=1 - [ZN830_RAT]	6	17	-0.59116	-0.436313	-1.14019	-0.436339	-0.469425	-0.518424	-0.664294	-0.502768
D4A2F3	Olfactory receptor OS=Rattus norvegicus OX=10116 GN=Olr1539 PE=3 SV=1 - [D4A2F3_RAT]	1	2	0.39543	0.118049	0.451793	0.54359	0.907738	1.0313	0.997452	0.989739
G3V7W1	Programmed cell death protein 6 OS=Rattus norvegicus OX=10116 GN=Pdcd6 PE=2 SV=1 - [PDCD6_RAT]	4	10	0.666173	0.0994344	0.774979	0.080698	0.329076	0.762388	0.719519	0.708493
D4A205	APC2, WNT-signaling pathway regulator OS=Rattus norvegicus OX=10116 GN=Apc2 PE=4 SV=1 - [D4A205_RAT]	2	3	0.487224	-0.0687725	0.266502	0.601884	0.766189	0.479942	0.387857	0.402694
B1H271	Mitochondrial coenzyme A transporter SLC25A42 OS=Rattus norvegicus OX=10116 GN=Slc25a42 PE=1 SV=1 - [B1H271_RAT]	1	2	-1.68173	-0.49424	-1.86348	-1.89498	-1.02748	-1.06461	-1.14396	-1.73684
B5DFJ3	Ddx23 protein (Fragment) OS=Rattus norvegicus OX=10116 GN=Ddx23 PE=2 SV=1 - [B5DFJ3_RAT]	22	49	-0.614977	-0.22476	-0.187776	0.027658	0.0910732	0.185057	0.106723	0.15599
Q5XIG0	ADP-ribose pyrophosphatase, mitochondrial OS=Rattus norvegicus OX=10116 GN=Nudt9 PE=2 SV=1 - [NUDT9_RAT]	4	8	-0.0521402	0.021132	-0.156243	-0.0440504	-0.181587	-0.42204	-0.480956	-0.507189
G3V8K8	Protein Z, vitamin K-dependent plasma glycoprotein OS=Rattus norvegicus OX=10116 GN=Proz PE=3 SV=4 - [G3V8K8_RAT]	3	5	0.400988	-0.0814458	-0.176072	0.00821904	-0.34396	-0.486472	-0.357668	-0.341181
P52944	PDZ and LIM domain protein 1 OS=Rattus norvegicus OX=10116 GN=Pdlim1 PE=1 SV=4 - [PDLI1_RAT]	12	53	0.273591	0.226408	-0.130299	0.0337879	-0.281338	-0.346463	-0.38199	-0.366503
D4A4D3	Tet methylcytosine dioxygenase 1 OS=Rattus norvegicus OX=10116 GN=Tet1 PE=4 SV=2 - [D4A4D3_RAT]	1	1	-1.03349		0.792189		-1.18173	-1.48643	-1.51678	-1.18372
D3ZPD9	Glucocorticoid modulatory element-binding protein 2 OS=Rattus norvegicus OX=10116 GN=Gmeb2 PE=1 SV=3 - [D3ZPD9_RAT]	2	2	-0.262331	-0.179564	-0.191818	0.143297	0.474604	0.725774	0.521199	0.48036
Q00238	Intercellular adhesion molecule 1 OS=Rattus norvegicus OX=10116 GN=Icam1 PE=2 SV=1 - [ICAM1_RAT]	6	13	0.284589	0.314809	0.866287	0.608928	0.309567	0.331663	0.182899	0.303578
Q9Z270	Vesicle-associated membrane protein-associated protein A OS=Rattus norvegicus OX=10116 GN=Vapa PE=1 SV=3 - [VAPA_RAT]	14	87	-0.027773	0.286557	0.314088	0.127381	0.275535	0.335201	0.284857	0.264343
Q641X5	Agpat6 protein (Fragment) OS=Rattus norvegicus OX=10116 GN=Agpat6 PE=2 SV=1 - [Q641X5_RAT]	1	1	-0.782139	-0.192405	0.566102	-1.02339	-0.52514	-0.652821	-0.746378	-1.1286
P33436	72 kDa type IV collagenase OS=Rattus norvegicus OX=10116 GN=Mmp2 PE=1 SV=2 - [MMP2_RAT]	3	4	0.091769	-0.220938	0.146273	0.0730567	0.218042	0.417769	0.344697	0.295942
F1LMN8	KH domain-containing, RNA-binding, signal transduction-associated protein 3 OS=Rattus norvegicus OX=10116 GN=Khdrbs3 PE=1 SV=2 - [F1LMN8_RAT]	1	8	-0.665504	-0.389383	-0.35821	-0.29161	-0.107926	-0.0680883	-0.219076	-0.201189
D3ZYK8	Matrix metallopeptidase 9 OS=Rattus norvegicus OX=10116 GN=Mmp9 PE=3 SV=1 - [D3ZYK8_RAT]	10	18	0.478203	-0.353655	0.250341	-0.169826	0.314043	0.841516	0.86811	0.764484
A0A0G2K101	Leucine zipper protein 1 OS=Rattus norvegicus OX=10116 GN=Luzp1 PE=1 SV=1 - [A0A0G2K101_RAT]	7	12	-0.313005	-0.321813	-0.437705	-0.315596	-0.436455	-0.413026	-0.268863	-0.376614
E9PTG8	Serine/threonine-protein kinase 10 OS=Rattus norvegicus OX=10116 GN=Stk10 PE=1 SV=1 - [STK10_RAT]	3	18	0.124265	-0.182484	-0.202618	-0.197933	-0.165857	-0.314181	-0.382586	-0.404449
Q1LZ53	DNA (cytosine-5)-methyltransferase 3A OS=Rattus norvegicus OX=10116 GN=Dnmt3a PE=1 SV=1 - [DNM3A_RAT]	14	38	-0.196235	-0.282231	0.241947	0.169566	0.165948	0.308316	0.178413	0.272983
P63322	Ras-related protein Ral-A OS=Rattus norvegicus OX=10116 GN=Rala PE=1 SV=1 - [RALA_RAT]	4	14	-0.743791	-0.32197	-0.158157	-0.327589	-0.357332	-0.135948	-0.217298	-0.11274
D4AC65	Cytochrome c oxidase assembly factor 7 OS=Rattus norvegicus OX=10116 GN=Coa7 PE=1 SV=1 - [D4AC65_RAT]	5	11	-0.0184984	0.266585	-0.109608	0.139632	-0.261594	-0.30964	-0.370235	-0.470788
A0A0U1RRX6	5-demethoxyubiquinone hydroxylase, mitochondrial (Fragment) OS=Rattus norvegicus OX=10116 GN=Coq7 PE=1 SV=1 - [A0A0U1RRX6_RAT]	3	9	0.794424	0.777542	0.320572	0.385358	0.296186	0.29398	0.44077	0.323177
P07687	Epoxide hydrolase 1 OS=Rattus norvegicus OX=10116 GN=Ephx1 PE=1 SV=1 - [HYEP_RAT]	16	47	-1.37792	-0.133795	-0.485253	-0.920262	-0.754279	-0.528503	-0.524776	-0.554791
B0BNG6	Use1 protein (Fragment) OS=Rattus norvegicus OX=10116 GN=Use1 PE=2 SV=1 - [B0BNG6_RAT]	4	7	0.0464779	0.14757	0.143768	0.203463	0.296463	0.482246	0.413513	0.408802
Q7TQ17	Zuotin related factor 2 OS=Rattus norvegicus OX=10116 GN=Zrf2 PE=2 SV=1 - [Q7TQ17_RAT]	3	7	-0.0474028	-0.094409	-0.375531	-0.114186	-0.29107	-0.508001	-0.460851	-0.384308
D4A7M6	Ribonucleotide reductase M2 polypeptide OS=Rattus norvegicus OX=10116 GN=LOC100359539 PE=1 SV=1 - [D4A7M6_RAT]	3	4	-0.0953775	-0.715606	-0.899366	-0.563096	-0.732906	-0.47688	-0.931735	-1.06525
Q5U2R4	tRNA methyltransferase 10 homolog C OS=Rattus norvegicus OX=10116 GN=Trmt10c PE=2 SV=1 - [TM10C_RAT]	3	4	-0.359096	0.080195	-0.209135	-0.140047	-0.206886	-0.371907	-0.588138	-0.496698
Q9JJ54	Heterogeneous nuclear ribonucleoprotein D0 OS=Rattus norvegicus OX=10116 GN=Hnrnpd PE=1 SV=2 - [HNRPD_RAT]	13	53	-0.28317	0.223243	-0.480908	0.0727922	-0.152642	-0.487724	-0.628394	-0.629308
P09606	Glutamine synthetase OS=Rattus norvegicus OX=10116 GN=Glul PE=1 SV=3 - [GLNA_RAT]	6	10	-0.436933	-0.132909	-0.509541	-1.05841	-0.623275	-0.361145	-0.356452	-0.480272
B5DFI9	Pdk3 protein OS=Rattus norvegicus OX=10116 GN=Pdk3 PE=2 SV=1 - [B5DFI9_RAT]	2	3	0.174688	0.188209	0.404046	0.00719636	0.416729	0.599429	0.636352	0.473928
Q7TSU1	Brefeldin A-inhibited guanine nucleotide-exchange protein 2 OS=Rattus norvegicus OX=10116 GN=Arfgef2 PE=1 SV=1 - [BIG2_RAT]	3	4	-0.0749457	-0.724507	-0.989016		-0.905303	-0.737855	-0.9325	-0.389742
O35142	Coatomer subunit beta' OS=Rattus norvegicus OX=10116 GN=Copb2 PE=1 SV=3 - [COPB2_RAT]	21	59	0.431663	0.184276	0.0258993	0.179454	0.160636	0.188193	0.0808198	0.0691436
A0A1W2Q6E9	Moesin OS=Rattus norvegicus OX=10116 GN=Msn PE=1 SV=1 - [A0A1W2Q6E9_RAT]	19	99	-0.349075	-0.371634	-0.449753	-0.360203	-0.324388	-0.309683	-0.382863	-0.301261
A0A0S2EF49	Glutaminase variant 5 OS=Rattus norvegicus OX=10116 PE=2 SV=1 - [A0A0S2EF49_RAT]	3	7	-0.116685	0.222411	-0.0607461	-0.202464	-0.162867	-0.51271	-0.259393	-0.651474
D3ZR49	alpha-1,2-Mannosidase OS=Rattus norvegicus OX=10116 GN=Man1a2 PE=1 SV=3 - [D3ZR49_RAT]	4	8	0.134127	0.556112	0.536478	0.186397	0.329397	0.464151	0.493308	0.420021
G3V8R0	Similar to sid2057p OS=Rattus norvegicus OX=10116 GN=RGD1311703 PE=1 SV=1 - [G3V8R0_RAT]	4	18	0.105354	0.36183	-0.496762	-0.265046	-0.367377	-0.719965	-0.797445	-0.645647
D3ZDW2	Small EDRK-rich factor 1 OS=Rattus norvegicus OX=10116 GN=Serf1 PE=4 SV=3 - [D3ZDW2_RAT]	1	2	-0.103049	-0.0323839	-0.419474	0.257911	-0.243149	-0.547793	-0.562829	-0.714658
D3ZFG5	Peripheral myelin protein 2 OS=Rattus norvegicus OX=10116 GN=Pmp2 PE=3 SV=1 - [D3ZFG5_RAT]	1	8	0.14058	-0.0914983	-0.0256818	0.222325	-0.270995	-0.684838	-0.941588	-0.898936
P08082	Clathrin light chain B OS=Rattus norvegicus OX=10116 GN=Cltb PE=1 SV=1 - [CLCB_RAT]	5	12	-0.303418	-0.199763	-0.210448	-0.0359424	-0.355454	-0.510739	-0.629356	-0.618716
B2RZ37	Receptor expression-enhancing protein 5 OS=Rattus norvegicus OX=10116 GN=Reep5 PE=1 SV=1 - [REEP5_RAT]	6	33	0.105781	0.24651	0.381099	-0.0971161	0.173369	0.430673	0.405025	0.431178
A0A0G2JUZ5	Glycine cleavage system P protein OS=Rattus norvegicus OX=10116 GN=Gldc PE=1 SV=1 - [A0A0G2JUZ5_RAT]	8	18	-0.533756	0.229321	-0.359332	-0.603625	-0.336614	-0.403151	-0.433478	-0.62166
Q62713	Neutrophil antibiotic peptide NP-3A OS=Rattus norvegicus OX=10116 PE=1 SV=1 - [DEF3A_RAT]	2	12	0.458575	-0.323223	0.109673	0.257434	0.434146	0.6312	0.566191	0.706117
A0A0G2K350	NSF attachment protein gamma OS=Rattus norvegicus OX=10116 GN=Napg PE=1 SV=1 - [A0A0G2K350_RAT]	14	52	0.474223	0.224254	0.499525	0.619676	0.509046	0.39533	0.408418	0.446004
F1MAD2	PATJ, crumbs cell polarity complex component OS=Rattus norvegicus OX=10116 GN=Patj PE=1 SV=2 - [F1MAD2_RAT]	18	27	0.481306	0.509314	0.641568	0.49332	0.321244	0.267859	0.434931	0.290793
D3ZE04	Collagen type VII alpha 1 chain OS=Rattus norvegicus OX=10116 GN=Col7a1 PE=4 SV=2 - [D3ZE04_RAT]	2	4	-1.60964	-1.32305	-1.13758	-1.64373	-1.3307	-0.8577	-0.849699	-0.813474
A0A0G2K7N7	Uncharacterized protein OS=Rattus norvegicus OX=10116 PE=1 SV=1 - [A0A0G2K7N7_RAT]	3	7	0.137542	-0.0348786	-0.440423	0.0111519	-0.295096	-0.460793	-0.658601	-0.469675
B1WC32	RCG53609 OS=Rattus norvegicus OX=10116 GN=Uba2 PE=2 SV=1 - [B1WC32_RAT]	5	9	-0.249685	-0.163434	-0.610851	-0.359608	-0.329784	-0.312365	-0.211083	-0.299713
P63014	Paired mesoderm homeobox protein 1 OS=Rattus norvegicus OX=10116 GN=Prrx1 PE=1 SV=1 - [PRRX1_RAT]	1	2	-0.506766	-0.23793	-0.267664	-0.0739101	-0.15105	-0.225863	-0.48957	-0.629157
P49793	Nuclear pore complex protein Nup98-Nup96 OS=Rattus norvegicus OX=10116 GN=Nup98 PE=1 SV=2 - [NUP98_RAT]	34	103	-0.294971	-0.188923	0.308729	0.352798	0.308466	0.19511	0.259937	0.213456
A0A0G2JYN3	Leucyl-cystinyl aminopeptidase OS=Rattus norvegicus OX=10116 GN=Lnpep PE=1 SV=1 - [A0A0G2JYN3_RAT]	8	17	0.0883571	0.0907113	0.482787	-0.0711013	0.329432	0.508685	0.554402	0.554787
Q0H8B9	C-type lectin domain family 2 member D11 OS=Rattus norvegicus OX=10116 GN=Clec2d11 PE=1 SV=1 - [CL2DB_RAT]	7	13	0.662128	0.479405	0.882954	0.662737	0.414306	0.41552	0.438618	0.37811
D3ZGY1	PYM homolog 1, exon junction complex-associated factor OS=Rattus norvegicus OX=10116 GN=Pym1 PE=1 SV=1 - [D3ZGY1_RAT]	3	6	-0.285919	-0.398488	-0.760008	-0.299614	-0.539457	-0.845205	-0.91891	-0.824097
A0A0H2UHG7	40S ribosomal protein S20 OS=Rattus norvegicus OX=10116 GN=Rps20 PE=3 SV=1 - [A0A0H2UHG7_RAT]	5	20	-0.410582	0.0847191	-0.437657	-0.313715	-0.313579	-0.415823	-0.438157	-0.392129
D3ZQY4	FRY-like transcription coactivator OS=Rattus norvegicus OX=10116 GN=Fryl PE=1 SV=2 - [D3ZQY4_RAT]	2	2	1.35621	0.829867	1.08878	0.904033	1.22935	1.45471	1.47938	1.42721
G3V679	Transferrin receptor protein 1 OS=Rattus norvegicus OX=10116 GN=Tfrc PE=1 SV=1 - [G3V679_RAT]	16	39	0.503303	0.644837	0.683162	0.295281	0.488965	0.652762	0.698278	0.67494
Q6IRK8	Spectrin alpha chain, non-erythrocytic 1 OS=Rattus norvegicus OX=10116 GN=Sptan1 PE=1 SV=1 - [Q6IRK8_RAT]	3	1137	-0.0493703	0.204885	0.202609	0.346946	0.364073	0.353264	0.384664	0.204792
D3ZGR7	RCG51149 OS=Rattus norvegicus OX=10116 GN=Trir PE=1 SV=1 - [D3ZGR7_RAT]	4	13	-0.727911	-0.270993	-0.422713	-0.157522	-0.302219	-0.326427	-0.455214	-0.581499
Q6U6G5	Zinc finger CCCH domain-containing protein 15 OS=Rattus norvegicus OX=10116 GN=Zc3h15 PE=1 SV=1 - [ZC3HF_RAT]	4	10	-0.340233	-0.419369	-0.935084	0.0435915	-0.312614	-0.711944	-0.668532	-0.731202
Q5FVC5	Nectin cell adhesion molecule 2 OS=Rattus norvegicus OX=10116 GN=Nectin2 PE=1 SV=1 - [Q5FVC5_RAT]	9	38	0.39289	0.231742	0.494639	0.0976756	0.292601	0.551391	0.412409	0.439408
F1LQP0	Cytohesin-3 (Fragment) OS=Rattus norvegicus OX=10116 GN=Cyth3 PE=4 SV=3 - [F1LQP0_RAT]	1	2	-0.487668	-0.271234	-0.356135	-0.392214	-0.263551	-0.194809	-0.220035	-0.160169
Q6AYT6	DEAD (Asp-Glu-Ala-Asp) box polypeptide 56 OS=Rattus norvegicus OX=10116 GN=Ddx56 PE=1 SV=1 - [Q6AYT6_RAT]	1	5	0.639909	0.881644	0.400485	0.171052	0.665736	1.12443	0.770972	1.04343
D3ZYH8	Myeloperoxidase OS=Rattus norvegicus OX=10116 GN=Mpo PE=1 SV=2 - [D3ZYH8_RAT]	1	638	0.433106	-0.484181	0.236351	0.357537	0.583017	0.797335	0.693124	0.720389
Q6GT74	Basigin, isoform CRA_b OS=Rattus norvegicus OX=10116 GN=Bsg PE=2 SV=1 - [Q6GT74_RAT]	11	126	0.695882	0.431181	0.794502	0.615328	0.352969	0.371243	0.43298	0.446915
B0BNF9	Hydroxyacid oxidase 1 OS=Rattus norvegicus OX=10116 GN=Hao1 PE=1 SV=1 - [B0BNF9_RAT]	11	23	-2.1937	-2.08912	-1.65547	-1.70551	-0.975252	-0.633007	-0.602246	-0.654118
A0A0G2K769	Multiple epidermal growth factor-like domains protein 6 OS=Rattus norvegicus OX=10116 GN=LOC100911486 PE=4 SV=1 - [A0A0G2K769_RAT]	3	4	-0.0422977	-0.0859116	-0.0141313	0.0872605	0.204138	0.318638	0.290923	0.38615
F1M0D2	Family with sequence similarity 124 member A OS=Rattus norvegicus OX=10116 GN=Fam124a PE=4 SV=2 - [F1M0D2_RAT]	1	1	-1.08018	-0.960989	-1.3954	-1.85226	-0.95843	-0.848119	-0.562123	-0.34993
Q63489	General transcription factor IIF subunit 2 OS=Rattus norvegicus OX=10116 GN=Gtf2f2 PE=1 SV=1 - [Q63489_RAT]	6	10	-0.0182687	-0.072021	-0.774225	-0.259393	-0.327736	-0.543557	-0.514589	-0.424632
Q5BJT6	Large subunit GTPase 1 homolog OS=Rattus norvegicus OX=10116 GN=Lsg1 PE=2 SV=1 - [LSG1_RAT]	7	8	0.207946	0.414777	0.392022	0.693847	0.63286	0.489228	0.458853	0.384966
Q6QBQ4	Phospholipid scramblase 3 OS=Rattus norvegicus OX=10116 GN=Plscr3 PE=2 SV=1 - [PLS3_RAT]	2	3	0.22723	-0.118605	0.248187	-0.124933	0.0655085	0.396836	0.624243	0.734169
A0A0G2JY69	Peroxisomal biogenesis factor 19 OS=Rattus norvegicus OX=10116 GN=Pex19 PE=1 SV=1 - [A0A0G2JY69_RAT]	6	39	0.215547	0.173201	0.00100721	0.150355	-0.134337	-0.348817	-0.331046	-0.296238
F1LXP8	Rho GTPase activating protein 18 (Predicted), isoform CRA_a OS=Rattus norvegicus OX=10116 GN=Arhgap18 PE=1 SV=2 - [F1LXP8_RAT]	4	4	0.141943	0.329077	0.0395495	-0.0704466	-0.377582	-0.258744	-0.887002	-0.743803
Q566E4	Heterogeneous nuclear ribonucleoprotein R OS=Rattus norvegicus OX=10116 GN=Hnrnpr PE=1 SV=1 - [Q566E4_RAT]	14	48	-0.356489	-0.102275	-0.624379	-0.0955687	-0.180623	-0.41452	-0.464577	-0.537964
D3ZP93	FLT3-interacting zinc finger 1 OS=Rattus norvegicus OX=10116 GN=Fiz1 PE=1 SV=1 - [D3ZP93_RAT]	2	3		-0.945089		-0.163322	-1.4102	-1.55571		-1.52018
D3ZBE8	UPF3B, regulator of nonsense mediated mRNA decay OS=Rattus norvegicus OX=10116 GN=Upf3b PE=1 SV=1 - [D3ZBE8_RAT]	2	2	-0.551624	0.047985	0.231362	-0.0991398	-0.733006	-1.40137	-0.790037	-0.599259
G3V7T6	Splicing factor 3b, subunit 1 OS=Rattus norvegicus OX=10116 GN=Sf3b1 PE=1 SV=1 - [G3V7T6_RAT]	37	146	-0.319522	-0.171847	-0.193427	-0.10411	0.27799	0.197007	0.213706	0.125294
F1MAA7	Laminin subunit gamma 1 OS=Rattus norvegicus OX=10116 GN=Lamc1 PE=1 SV=1 - [F1MAA7_RAT]	38	138	-0.345872	-0.197946	0.119775	-0.185463	0.0764046	0.461817	0.463885	0.404916
D3ZLC3	Sperm specific antigen 2 (Predicted) OS=Rattus norvegicus OX=10116 GN=Ssfa2 PE=1 SV=1 - [D3ZLC3_RAT]	6	10	-0.531685	-0.542747	0.0455971	0.108337	0.519849	0.515747	0.606241	0.536847
Q5XII5	Telomerase Cajal body protein 1 OS=Rattus norvegicus OX=10116 GN=Wrap53 PE=1 SV=1 - [WAP53_RAT]	1	1	0.447439	0.318441	0.510436	0.860694	0.641884	0.494097	0.504488	0.363269
Q4V8B9	Histone-lysine N-methyltransferase OS=Rattus norvegicus OX=10116 GN=Smyd3 PE=2 SV=1 - [Q4V8B9_RAT]	1	2	-0.744989	0.141879	-0.179175	-1.10439	-1.20555	-0.761046	-0.445899	-0.840105
E9PTG5	Pleckstrin homology domain-containing A5 OS=Rattus norvegicus OX=10116 GN=Plekha5 PE=1 SV=2 - [E9PTG5_RAT]	6	11	-0.0983083	0.0527757	0.0721189	0.17462	0.326076	0.342352	0.461208	0.394583
P35565	Calnexin OS=Rattus norvegicus OX=10116 GN=Canx PE=1 SV=1 - [CALX_RAT]	34	264	0.185475	0.129855	0.414807	0.27476	0.153795	0.257487	0.306699	0.235149
P07756	Carbamoyl-phosphate synthase [ammonia], mitochondrial OS=Rattus norvegicus OX=10116 GN=Cps1 PE=1 SV=1 - [CPSM_RAT]	76	1228	-0.250356	0.206233	-0.172783	-0.772021	-0.647516	-0.480786	-0.497063	-0.499713
F1LSB4	Zinc finger protein 385D OS=Rattus norvegicus OX=10116 GN=Zfp385d PE=4 SV=3 - [F1LSB4_RAT]	1	1	0.45336	-0.486972		-0.0094969	-0.830836	-0.606025	-0.471694
O35796	Complement component 1 Q subcomponent-binding protein, mitochondrial OS=Rattus norvegicus OX=10116 GN=C1qbp PE=1 SV=2 - [C1QBP_RAT]	5	27	0.148321	-0.0493311	-0.0974401	-0.0241067	-0.321472	-0.737239	-0.824491	-0.601709
A0A0G2K4X5	Zinc fingers and homeoboxes protein 3 OS=Rattus norvegicus OX=10116 GN=Zhx3 PE=1 SV=1 - [A0A0G2K4X5_RAT]	5	7	-0.00441029	-0.617705	-0.543978	-0.309547	-0.416583	-0.924394	-0.699731	-0.606593
D3ZUU8	SEC14-like lipid-binding 4 OS=Rattus norvegicus OX=10116 GN=Sec14l4 PE=1 SV=1 - [D3ZUU8_RAT]	3	7	-0.0825699	-0.384235	-0.389658	-0.756503	-0.511426	-0.255556	-0.515163	-0.519449
A0A0G2K3Z3	RAB22A, member RAS oncogene family OS=Rattus norvegicus OX=10116 GN=Rab22a PE=1 SV=1 - [A0A0G2K3Z3_RAT]	1	5	0.158711	0.331611	0.217443	0.320946	0.372863	0.188298	0.441155	0.517488
Q8R490	Cadherin 13 OS=Rattus norvegicus OX=10116 GN=Cdh13 PE=1 SV=1 - [Q8R490_RAT]	5	11	-0.777718	-0.430569	-0.37196	-0.594779	-0.496377	-0.31436	-0.366032	-0.467053
A0A0G2K0M8	Neural cell adhesion molecule 1 OS=Rattus norvegicus OX=10116 GN=Ncam1 PE=1 SV=1 - [A0A0G2K0M8_RAT]	5	41	-1.38663	-1.78635	-1.26866	-0.972144	-1.11337	-1.20699	-1.11514	-1.11214
A0A0G2JZ88	Similar to hypothetical protein A530094D01 OS=Rattus norvegicus OX=10116 GN=RGD1306556 PE=1 SV=1 - [A0A0G2JZ88_RAT]	17	37	-0.0556063	0.271442	0.156353	-0.0291887	-0.319397	-0.425543	-0.352492	-0.34012
F1M3H3	Fraser extracellular matrix complex subunit 1 OS=Rattus norvegicus OX=10116 GN=Fras1 PE=4 SV=3 - [F1M3H3_RAT]	21	46	0.0954506	-0.181705	0.457805	0.226079	0.27606	0.583406	0.534325	0.572339
P62250	40S ribosomal protein S16 OS=Rattus norvegicus OX=10116 GN=Rps16 PE=1 SV=2 - [RS16_RAT]	12	42	-0.45457	0.124904	-0.370615	-0.325993	-0.442978	-0.452987	-0.50579	-0.508102
Q9QX71	Napsin OS=Rattus norvegicus OX=10116 GN=Napsa PE=1 SV=1 - [Q9QX71_RAT]	2	6	0.250056	-0.0830673	0.344335	-0.123476	0.349572	0.628268	0.77162	0.662292
Q63150	Dihydropyrimidinase OS=Rattus norvegicus OX=10116 GN=Dpys PE=1 SV=2 - [DPYS_RAT]	13	54	0.0439346	-0.948398	-0.746902	-0.564145	-0.762146	-0.731697	-0.740623	-0.732189
Q6TXG6	LRRGT00033 OS=Rattus norvegicus OX=10116 PE=2 SV=1 - [Q6TXG6_RAT]	2	2	-0.121643	-0.149435	-0.181057	0.0166661	0.373224	0.466059	0.436556	0.286478
D4AB25	Four jointed box 1 OS=Rattus norvegicus OX=10116 GN=Fjx1 PE=4 SV=1 - [D4AB25_RAT]	1	2	-1.57327	-1.5724	-0.882898	-0.94447	-0.627014	-0.51408	-0.621544	-0.385962
A0A0G2K6M9	Tyrosine-protein kinase OS=Rattus norvegicus OX=10116 GN=Btk PE=3 SV=1 - [A0A0G2K6M9_RAT]	1	2	0.0907707	0.274559	0.286727	0.0581966	0.0309055	0.143545	0.289338	0.268738
O70127	Bile salt export pump OS=Rattus norvegicus OX=10116 GN=Abcb11 PE=1 SV=1 - [ABCBB_RAT]	17	46	-1.46633	-0.644963	-0.743473	-1.48063	-1.00018	-0.762837	-0.819123	-0.796061
Q9JLZ1	Glutaredoxin-3 OS=Rattus norvegicus OX=10116 GN=Glrx3 PE=1 SV=2 - [GLRX3_RAT]	8	23	0.260959	-0.0525073	-0.408343	-0.208712	-0.300853	-0.50631	-0.560411	-0.445561
F1MAB8	Kinesin family member 11 OS=Rattus norvegicus OX=10116 GN=Kif11 PE=1 SV=1 - [F1MAB8_RAT]	3	3	-0.53032	-1.40373	-1.28333		-0.158918	-0.500176	-0.401821	-0.518779
Q6AY87	THO complex subunit 6 homolog OS=Rattus norvegicus OX=10116 GN=Thoc6 PE=2 SV=1 - [THOC6_RAT]	3	6	-0.134064	-0.136708	0.244568	0.393248	0.181241	0.291442	0.256411	0.323608
P16296	Coagulation factor IX OS=Rattus norvegicus OX=10116 GN=F9 PE=2 SV=2 - [FA9_RAT]	1	5	0.453072	0.0732129	0.242629	0.292945	0.409415	0.470509	0.464506	0.477502
D4ABG1	Olfactory receptor OS=Rattus norvegicus OX=10116 GN=Olr110 PE=3 SV=1 - [D4ABG1_RAT]	1	1	-0.30519	-0.241774	0.0275351	0.912495	-1.09904	-1.01871		-0.994914
A0A0G2K4S6	Engulfment and cell motility 1 OS=Rattus norvegicus OX=10116 GN=Elmo1 PE=1 SV=1 - [A0A0G2K4S6_RAT]	3	6	0.0438898	-0.109419	0.0209592	0.0277927	0.156976	0.229808	0.160721	0.305321
P97615	Thioredoxin, mitochondrial OS=Rattus norvegicus OX=10116 GN=Txn2 PE=2 SV=1 - [THIOM_RAT]	2	4	0.247796	0.144639	-0.285012	-0.166784	-0.639304	-0.563021	-0.676897	-0.721992
H6X2V2	Pentaxin OS=Rattus norvegicus OX=10116 GN=crp PE=3 SV=1 - [H6X2V2_RAT]	1	2	0.886343	0.0101737	0.390031	0.428638	0.418331	0.625154	0.621321	0.476234
F7EL93	Immunoglobulin superfamily, DCC subclass, member 4 OS=Rattus norvegicus OX=10116 GN=Igdcc4 PE=4 SV=2 - [F7EL93_RAT]	4	6	-0.415324	-0.278841	-0.266063	-0.628781	-0.338154	-0.264369	-0.3114	-0.160057
Q03346	Mitochondrial-processing peptidase subunit beta OS=Rattus norvegicus OX=10116 GN=Pmpcb PE=1 SV=3 - [MPPB_RAT]	9	32	0.615264	0.354805	0.458115	0.3158	0.286631	0.116374	0.096744	0.145724
D4A5F4	Hypothetical LOC289568 OS=Rattus norvegicus OX=10116 GN=RGD1311575 PE=1 SV=3 - [D4A5F4_RAT]	3	5	-0.622642	-0.608239	-0.390264	-0.894797	-0.519163	-0.854409	-0.802851	-1.39262
Q66HF9	Leucine-rich repeat flightless-interacting protein 1 OS=Rattus norvegicus OX=10116 GN=Lrrfip1 PE=1 SV=1 - [LRRF1_RAT]	13	54	0.113228	-0.269914	-0.293996	0.0366683	-0.50778	-0.693178	-0.527928	-0.587568
M0R7T1	Phosphatase and actin regulator OS=Rattus norvegicus OX=10116 GN=Phactr4 PE=1 SV=2 - [M0R7T1_RAT]	5	6	-0.133352	-0.788212	-1.58633	-0.421885	-1.05537	-1.38391	-0.927521	-0.641717
G3V622	Nuclear receptor-binding factor 2 OS=Rattus norvegicus OX=10116 GN=Nrbf2 PE=1 SV=1 - [G3V622_RAT]	5	7	-0.41557	-0.463078	-0.501383	-0.602766	-0.690824	-0.349883	-0.268773	-0.230173
P85108	Tubulin beta-2A chain OS=Rattus norvegicus OX=10116 GN=Tubb2a PE=1 SV=1 - [TBB2A_RAT]	1	258	-0.296075	-0.501767	-0.169924	-0.331562	-0.295279	-0.220446	-0.164445	-0.290542
A0A0G2JSY8	RCG51087 OS=Rattus norvegicus OX=10116 GN=Junb PE=1 SV=1 - [A0A0G2JSY8_RAT]	1	4	0.303698	0.363889	0.680008	0.46039	0.24637	0.281792	0.364216	0.446755
P13471	40S ribosomal protein S14 OS=Rattus norvegicus OX=10116 GN=Rps14 PE=2 SV=3 - [RS14_RAT]	5	37	-0.646058	-0.163204	-0.473281	-0.274536	-0.379229	-0.521132	-0.497282	-0.436404
D3Z8I7	Glutathione S-transferase, theta 3 OS=Rattus norvegicus OX=10116 GN=Gstt3 PE=1 SV=1 - [D3Z8I7_RAT]	2	8	0.123145	-0.484819	-0.639787	-1.20658	-1.03369	-0.827331	-0.755054	-0.712792
F1LVT5	RUN domain-containing 1 OS=Rattus norvegicus OX=10116 GN=Rundc1 PE=4 SV=2 - [F1LVT5_RAT]	1	1	0.259081	0.641922	1.0472	0.446514	0.218857	0.401168	0.559226	0.528973
D3ZWN1	Similar to zinc finger protein (Predicted) OS=Rattus norvegicus OX=10116 GN=Zpr1 PE=1 SV=1 - [D3ZWN1_RAT]	13	26	0.305474	-0.075694	-0.3108	-0.0752549	-0.435128	-0.478411	-0.52724	-0.470485
A0A0G2JUU6	Exosome complex component RRP45 OS=Rattus norvegicus OX=10116 GN=Exosc9 PE=1 SV=1 - [A0A0G2JUU6_RAT]	4	9	-0.260818	-0.37758	-0.091341	0.18347	0.291927	0.258855	0.232557	0.104744
Q6AY39	UDP-GalNAc:beta-1,3-N-acetylgalactosaminyltransferase 1 OS=Rattus norvegicus OX=10116 GN=B3galnt1 PE=2 SV=1 - [B3GL1_RAT]	1	1	-0.670477	-0.497693		0.287869	-1.02175	-0.801729	-0.753331	-1.00592
A0A0G2K8D1	Motile sperm domain-containing 2 OS=Rattus norvegicus OX=10116 GN=Mospd2 PE=1 SV=1 - [A0A0G2K8D1_RAT]	5	9	0.0560332	0.29977	0.478629	0.128939	0.324127	0.506031	0.444884	0.409864
D3ZFJ6	Lactamase, beta OS=Rattus norvegicus OX=10116 GN=Lactb PE=1 SV=1 - [D3ZFJ6_RAT]	13	31	-0.316623	-0.099351	-0.077927	-0.290016	-0.318704	-0.257235	-0.287846	-0.322101
P97887	Presenilin-1 OS=Rattus norvegicus OX=10116 GN=Psen1 PE=1 SV=1 - [PSN1_RAT]	2	8	0.0176713	0.149157	0.169382	0.218586	0.271133	0.326227	0.302481	0.182174
Q3KR94	Vitronectin OS=Rattus norvegicus OX=10116 GN=Vtn PE=1 SV=1 - [Q3KR94_RAT]	8	18	-0.511944	-0.605583	-0.595756	-0.676684	-0.485055	-0.282939	-0.397667	-0.304777
A0A0G2K4I9	Coagulation factor XI OS=Rattus norvegicus OX=10116 GN=F11 PE=1 SV=1 - [A0A0G2K4I9_RAT]	8	21	0.261676	0.258531	0.50684	0.139227	-0.502777	-0.595507	-0.610968	-0.617052
Q5XI79	Protein arginine methyltransferase NDUFAF7, mitochondrial OS=Rattus norvegicus OX=10116 GN=Ndufaf7 PE=2 SV=1 - [NDUF7_RAT]	5	11	0.444079	0.530311	0.613822	0.176738	0.335189	0.471849	0.629004	0.688155
P14659	Heat shock-related 70 kDa protein 2 OS=Rattus norvegicus OX=10116 GN=Hspa2 PE=1 SV=2 - [HSP72_RAT]	2	303	-1.30585	-1.18263	-1.10597	-0.918558	-0.671422	-0.679551	-0.463459	-0.607251
P60825	Cold-inducible RNA-binding protein OS=Rattus norvegicus OX=10116 GN=Cirbp PE=2 SV=1 - [CIRBP_RAT]	5	12	-0.555935	-0.581152	-0.962826	-0.32867	-0.640972	-0.751648	-0.99357	-0.842303
Q9WUC4	Copper transport protein ATOX1 OS=Rattus norvegicus OX=10116 GN=Atox1 PE=1 SV=1 - [ATOX1_RAT]	4	10	0.252848	-0.0939358	-0.352432	0.0689912	-0.202188	-0.456189	-0.407364	-0.456693
Q68G33	Golgi reassembly-stacking protein 2 OS=Rattus norvegicus OX=10116 GN=Gorasp2 PE=1 SV=1 - [Q68G33_RAT]	11	43	0.588558	0.454375	0.48617	0.127807	0.221502	0.337145	0.284106	0.277875
F1LX55	EPH receptor A10 OS=Rattus norvegicus OX=10116 GN=Epha10 PE=4 SV=3 - [F1LX55_RAT]	2	7	-0.579816	-0.585903	-0.115499	-0.277565	-0.826432	-0.758314	-0.791888	-0.495802
Q63803	Guanine nucleotide-binding protein G(s) subunit alpha isoforms XLas OS=Rattus norvegicus OX=10116 GN=Gnas PE=1 SV=3 - [GNAS1_RAT]	6	21	0.0668999	0.484014	0.628342	0.221979	0.573926	0.758385	0.721016	0.644057
P59924	THO complex subunit 1 OS=Rattus norvegicus OX=10116 GN=Thoc1 PE=2 SV=1 - [THOC1_RAT]	1	18	0.17577	-0.0675445	0.220878	0.275846	0.345062	0.246246	0.156658	0.384405
Q6B345	Protein S100-A11 OS=Rattus norvegicus OX=10116 GN=S100a11 PE=3 SV=1 - [S10AB_RAT]	4	44	0.165163	-0.131561	0.0156162	0.439367	0.620824	0.59772	0.570084	0.355715
Q6TXG7	Serine hydroxymethyltransferase OS=Rattus norvegicus OX=10116 GN=Shmt1 PE=1 SV=1 - [Q6TXG7_RAT]	8	20	0.171125	0.278081	-0.19626	-0.329648	-0.348914	-0.371378	-0.304638	-0.393797
A0A0G2K5U9	Alpha-actinin-4 OS=Rattus norvegicus OX=10116 GN=Actn4 PE=1 SV=1 - [A0A0G2K5U9_RAT]	1	547	0.634968	0.767664	0.909418	0.943357	0.667771	0.644441	0.523232	0.543299
D4A5T1	Splicing factor 3B subunit 5 OS=Rattus norvegicus OX=10116 GN=Sf3b5 PE=1 SV=1 - [D4A5T1_RAT]	3	15	0.085447	-0.156222	-0.0897255	0.363264	0.493467	0.405471	0.353932	0.207204
Q52KJ9	Thioredoxin domain containing 1 OS=Rattus norvegicus OX=10116 GN=Tmx1 PE=1 SV=1 - [Q52KJ9_RAT]	9	23	-0.0544309	0.498144	0.345511	0.0718122	0.485663	0.790591	0.758316	0.591967
Q68FR2	Bridging integrator 2 OS=Rattus norvegicus OX=10116 GN=Bin2 PE=1 SV=1 - [BIN2_RAT]	8	25	0.632076	0.154801	-0.122656	0.10016	0.219084	0.465009	0.420029	0.326066
B2GV24	E3 UFM1-protein ligase 1 OS=Rattus norvegicus OX=10116 GN=Ufl1 PE=1 SV=1 - [UFL1_RAT]	26	67	0.327848	0.359512	0.35223	0.445614	0.158802	0.151623	0.11355	0.109514
A0A0G2JWJ0	Protein phosphatase 1 regulatory subunit 12A OS=Rattus norvegicus OX=10116 GN=Ppp1r12a PE=1 SV=1 - [A0A0G2JWJ0_RAT]	24	54	-0.53535	-0.457799	-0.618381	-0.417767	-0.57559	-0.699109	-0.7263	-0.658583
D4A269	Uncharacterized protein OS=Rattus norvegicus OX=10116 PE=4 SV=1 - [D4A269_RAT]	2	24	0.260214	-0.0770536	-0.550705	-0.0865209	-0.285325	-0.557067	-0.695566	-0.507416
D4ADB4	CGG triplet repeat binding protein 1 (Predicted) OS=Rattus norvegicus OX=10116 GN=Cggbp1 PE=1 SV=1 - [D4ADB4_RAT]	2	3	-0.401217	-0.397514	-0.201088	0.0461666	-0.395618	-0.498084	-0.367468	-0.280051
D4AC36	Eukaryotic translation initiation factor 3 subunit F OS=Rattus norvegicus OX=10116 GN=Eif3f PE=1 SV=3 - [D4AC36_RAT]	7	19	0.237024	0.28544	0.224412	-0.0383348	0.354958	0.537962	0.522775	0.405463
Q5M853	KxDL motif-containing protein 1 OS=Rattus norvegicus OX=10116 GN=Kxd1 PE=1 SV=1 - [KXDL1_RAT]	1	1	0.796264	0.685769	0.160679	0.874265	0.713846	0.74913	0.693681	0.874373
B4F7E7	Membrane palmitoylated protein 5 OS=Rattus norvegicus OX=10116 GN=Mpp5 PE=1 SV=1 - [B4F7E7_RAT]	7	15	-0.147763	0.592417	0.282552	0.11604	-0.0166624	-0.302145	-0.326572	-0.27627
O70377	Synaptosomal-associated protein 23 OS=Rattus norvegicus OX=10116 GN=Snap23 PE=1 SV=1 - [SNP23_RAT]	12	87	0.755124	0.778382	0.845425	0.819711	0.534532	0.51421	0.498322	0.458829
B2GV62	Mitochondrial ribosomal protein L20 OS=Rattus norvegicus OX=10116 GN=Mrpl20 PE=1 SV=1 - [B2GV62_RAT]	1	2	-0.719928	0.0516124	-0.488951	-0.723672	-0.704559	-0.721999	-0.45814	-0.606006
P62282	40S ribosomal protein S11 OS=Rattus norvegicus OX=10116 GN=Rps11 PE=1 SV=3 - [RS11_RAT]	11	29	-0.395588	0.100973	-0.313271	-0.300439	-0.470713	-0.644599	-0.55024	-0.574884
Q68FY1	Nucleoporin NUP35 OS=Rattus norvegicus OX=10116 GN=Nup35 PE=1 SV=1 - [NUP35_RAT]	7	36	0.172352	0.0907407	0.528051	0.539933	0.376305	0.434625	0.426482	0.313724
D4A617	Ectonucleoside triphosphate diphosphohydrolase 1 OS=Rattus norvegicus OX=10116 GN=LOC103689954 PE=3 SV=2 - [D4A617_RAT]	3	5	0.335909	0.450046	0.789829	0.32269	0.500873	0.40156	0.435044	0.592171
D3ZD19	Extracellular link domain-containing 1 (Predicted) OS=Rattus norvegicus OX=10116 GN=Lyve1 PE=1 SV=1 - [D3ZD19_RAT]	6	18	0.574929	0.304827	0.491527	0.490839	0.365522	0.205704	0.0948476	0.151844
M0R5V1	Protein phosphatase, Mg2+/Mn2+-dependent, 1L OS=Rattus norvegicus OX=10116 GN=Ppm1l PE=1 SV=1 - [M0R5V1_RAT]	1	1	-0.0423876	0.74627	0.97165	0.438194	0.308692	0.899037	0.974162	0.916183
Q3MID9	Ogfr protein OS=Rattus norvegicus OX=10116 GN=Ogfr PE=1 SV=1 - [Q3MID9_RAT]	3	6	0.256707	0.266708	-0.115344	-0.190615	-0.220032	-0.176664	-0.139485	-0.310445
A0A0G2K261	Isoleucyl-tRNA synthetase 2, mitochondrial OS=Rattus norvegicus OX=10116 GN=Iars2 PE=1 SV=1 - [A0A0G2K261_RAT]	13	33	0.43958	0.264789	0.628828	0.223549	0.188692	0.439936	0.332156	0.356632
P32089	Tricarboxylate transport protein, mitochondrial OS=Rattus norvegicus OX=10116 GN=Slc25a1 PE=1 SV=1 - [TXTP_RAT]	5	19	-0.641637	0.19154	-0.163297	-0.884119	-0.572536	-0.400624	-0.450953	-0.563818
Q642B4	C-type lectin domain family 14, member a OS=Rattus norvegicus OX=10116 GN=Clec14a PE=1 SV=1 - [Q642B4_RAT]	4	6	0.751754	0.654031	0.444426	0.400678	0.386536	0.482532	0.405169	0.418482
Q04753	Methylosome subunit pICln OS=Rattus norvegicus OX=10116 GN=Clns1a PE=1 SV=1 - [ICLN_RAT]	5	21	0.0340164	-0.400697	-0.698995	-0.206882	-0.366523	-0.544863	-0.618208	-0.373465
P25977	Nucleolar transcription factor 1 OS=Rattus norvegicus OX=10116 GN=Ubtf PE=1 SV=1 - [UBF1_RAT]	25	67	-0.644243	-0.684566	-0.130411	-0.0019425	-0.199057	-0.251027	-0.286312	-0.19549
D3ZBG6	Peptidyl-tRNA hydrolase domain-containing 1 OS=Rattus norvegicus OX=10116 GN=Ptrhd1 PE=1 SV=1 - [D3ZBG6_RAT]	3	4	0.238209	-0.132979	-0.549708	-0.496123	-0.473612	-0.504617	-0.589923	-0.406419
D4A3S8	NOL1/NOP2/Sun domain family, member 2 (Predicted) OS=Rattus norvegicus OX=10116 GN=Nsun2 PE=1 SV=1 - [D4A3S8_RAT]	5	8	0.194009	0.24737	-0.212341	-0.0835437	-0.285165	-0.296837	-0.359502	-0.22752
Q6MG48	Protein PRRC2A OS=Rattus norvegicus OX=10116 GN=Prrc2a PE=1 SV=1 - [PRC2A_RAT]	20	41	-0.0499474	-0.299825	-0.350594	-0.112451	-0.165808	-0.299888	-0.217117	-0.328644
A4L691	PIN2/TERF1-interacting telomerase inhibitor 1 OS=Rattus norvegicus OX=10116 GN=Pinx1 PE=1 SV=1 - [PINX1_RAT]	1	2	-0.10295	-0.233138	0.0902122	0.0414174	-0.296587	-0.396106	-0.209879	-0.18896
E9PTR4	RCG62582, isoform CRA_b OS=Rattus norvegicus OX=10116 GN=Ubap2l PE=1 SV=2 - [E9PTR4_RAT]	12	45	0.192155	0.196053	-0.336391	-0.0341525	-0.293698	-0.463672	-0.415105	-0.505797
M0R6R9	Titin-like OS=Rattus norvegicus OX=10116 GN=LOC102549011 PE=1 SV=2 - [M0R6R9_RAT]	1	1	-1.36953	-0.652783	-0.192158	-1.09991	-1.03851	-0.541088	-0.491913	-0.428039
G3V928	LDL receptor-related protein 1 OS=Rattus norvegicus OX=10116 GN=Lrp1 PE=1 SV=1 - [G3V928_RAT]	92	328	0.267424	0.0105944	0.286924	0.302952	0.305829	0.348612	0.318729	0.311449
P00762	Anionic trypsin-1 OS=Rattus norvegicus OX=10116 GN=Prss1 PE=1 SV=1 - [TRY1_RAT]	1	20	-0.0954674	-0.0894816	-0.0547654	-0.0373138	-0.227503	-0.414501	-0.349467	-0.160212
Q5PQZ9	NADH dehydrogenase [ubiquinone] 1 subunit C2 OS=Rattus norvegicus OX=10116 GN=Ndufc2 PE=1 SV=1 - [Q5PQZ9_RAT]	5	16	-0.545063	0.0569285	-0.221389	-0.546754	-0.648685	-0.481205	-0.540446	-0.512841
D4A5Y6	Mak3 homolog (S. cerevisiae) (Predicted) OS=Rattus norvegicus OX=10116 GN=Naa50 PE=1 SV=1 - [D4A5Y6_RAT]	4	10	-0.248557	-0.198045	-0.424884	-0.342272	-0.581252	-0.511341	-0.493816	-0.357478
O35147	Bcl2-associated agonist of cell death OS=Rattus norvegicus OX=10116 GN=Bad PE=1 SV=2 - [BAD_RAT]	2	3	-0.038169	-0.274147	-0.0113042	0.118536	0.195157	0.129099	0.208049	0.254389
A0A0G2K9Y5	Histidine-rich glycoprotein OS=Rattus norvegicus OX=10116 GN=Hrg PE=1 SV=1 - [A0A0G2K9Y5_RAT]	10	31	-0.519112	-1.00784	-0.972201	-0.416142	-0.353122	-0.411724	-0.455381	-0.429423
D3ZVK3	tRNA (adenine(58)-N(1))-methyltransferase non-catalytic subunit TRM6 OS=Rattus norvegicus OX=10116 GN=Trmt6 PE=1 SV=1 - [D3ZVK3_RAT]	1	1	0.248274	0.0820786	0.0358244	0.189473	-0.339463	-0.368288	-0.325958	-0.212522
Q66HC2	Vaccinia-related kinase 3 OS=Rattus norvegicus OX=10116 GN=Vrk3 PE=1 SV=1 - [Q66HC2_RAT]	2	4	0.136685	0.198862	0.8932	0.282411	0.111714	0.498293	0.612879	0.645251
Q9JIR0	Peripheral-type benzodiazepine receptor-associated protein 1 OS=Rattus norvegicus OX=10116 GN=Tspoap1 PE=1 SV=2 - [RIMB1_RAT]	2	2	-1.8171	-2.77357	0.404968		-2.03938	-1.62262	-1.40583	-1.58818
A0A0G2JYA4	Serine/threonine-protein phosphatase OS=Rattus norvegicus OX=10116 GN=LOC100362453 PE=3 SV=1 - [A0A0G2JYA4_RAT]	2	21	0.349658	0.2493	0.364144	0.065813	0.226722	0.341456	0.564627	0.487083
D4A158	Calcium homeostasis modulator 3 OS=Rattus norvegicus OX=10116 GN=Calhm3 PE=4 SV=1 - [D4A158_RAT]	1	2	-1.09523	0.0258092	-0.621261	-0.870274	-0.667235	-0.872549	-1.13538	-0.998615
A0A0G2K0Y2	Insulin-like growth factor 2 mRNA-binding protein 3 OS=Rattus norvegicus OX=10116 GN=Igf2bp3 PE=1 SV=1 - [A0A0G2K0Y2_RAT]	12	29	0.195037	0.108597	-0.297063	0.0993682	-0.0941498	-0.257607	-0.320003	-0.326663
D4A994	ER membrane protein complex subunit 1 OS=Rattus norvegicus OX=10116 GN=Emc1 PE=1 SV=1 - [D4A994_RAT]	8	9	-0.26121	0.162575	-0.135898	-0.328555	-0.138131	-0.201342	-0.281048	-0.277151
O35820	2'-deoxynucleoside 5'-phosphate N-hydrolase 1 OS=Rattus norvegicus OX=10116 GN=Dnph1 PE=1 SV=1 - [DNPH1_RAT]	2	4	0.476262	0.0637739	-0.247932	0.111031	0.168723	0.42309	0.4888	0.172059
B0BMT9	Sqrdl protein OS=Rattus norvegicus OX=10116 GN=Sqor PE=1 SV=1 - [B0BMT9_RAT]	8	18	0.288112	0.151996	0.826062	0.134767	0.233382	0.573132	0.678241	0.590145
C9DRP4	6-phosphofructo-2-kinase/fructose-2, 6-bisphosphatase 1 variant OS=Rattus norvegicus OX=10116 GN=pfkfb1 PE=2 SV=1 - [C9DRP4_RAT]	10	16	-0.60701	-0.359783	-0.596034	-0.761292	-0.557776	-0.389529	-0.30609	-0.259831
Q8K597	Proteinase 3 OS=Rattus norvegicus OX=10116 GN=Prtn3 PE=3 SV=1 - [Q8K597_RAT]	1	2	-0.234276	-0.49813	0.778067	0.612384	0.505662	0.877822	1.05047	0.711542
F1LPG9	WASH complex subunit 2C OS=Rattus norvegicus OX=10116 GN=Washc2c PE=1 SV=2 - [F1LPG9_RAT]	16	33	-0.0165384	-0.240685	-0.422777	-0.232104	-0.379244	-0.571029	-0.499002	-0.565485
Q499U6	Non-structural maintenance of chromosomes element 1 homolog OS=Rattus norvegicus OX=10116 GN=Nsmce1 PE=2 SV=2 - [NSE1_RAT]	1	2	0.289792	0.00510856	0.351188	0.407679	0.259219	0.171241	0.19192	0.262367
E9PTX9	Solute carrier family 12 member 2 OS=Rattus norvegicus OX=10116 GN=Slc12a2 PE=1 SV=1 - [E9PTX9_RAT]	2	8	-0.409444	-0.748397	-0.229227	-0.412468	-0.367082	-0.228723	-0.231918	-0.36516
P22509	rRNA 2'-O-methyltransferase fibrillarin OS=Rattus norvegicus OX=10116 GN=Fbl PE=1 SV=2 - [FBRL_RAT]	15	78	-0.220308	0.0752859	0.333294	0.118395	0.126917	0.218189	0.160326	0.201664
Q6AYK3	Inositol-3-phosphate synthase 1 OS=Rattus norvegicus OX=10116 GN=Isyna1 PE=3 SV=2 - [INO1_RAT]	10	26	0.617441	0.103293	-0.201612	-0.1469	-0.549494	-0.61627	-0.636959	-0.624215
O88867	Kynurenine 3-monooxygenase OS=Rattus norvegicus OX=10116 GN=Kmo PE=1 SV=1 - [KMO_RAT]	3	5	-0.760781	-0.31283	-0.72801	-0.988342	-0.769098	-0.553657	-0.598881	-0.490779
D3ZDS2	Macrophage scavenger receptor 1 OS=Rattus norvegicus OX=10116 GN=Msr1 PE=1 SV=3 - [D3ZDS2_RAT]	9	25	0.852049	0.341268	0.919156	0.316896	0.229987	0.288708	0.368381	0.42254
B1WC42	LOC686323 protein OS=Rattus norvegicus OX=10116 GN=Trip6 PE=2 SV=1 - [B1WC42_RAT]	3	5	-0.534795	0.0218766	-0.0812995	0.0958435	-0.301742	-0.421866	-0.321833	-0.98524
Q9JJ05	Glycoprotein-N-acetylgalactosamine 3-beta-galactosyltransferase 1 OS=Rattus norvegicus OX=10116 GN=C1galt1 PE=1 SV=1 - [C1GLT_RAT]	2	3	-0.222002	0.525586	0.167167	0.0301549	0.444962	0.60291	0.664108	0.581092
Q6IMZ3	Annexin OS=Rattus norvegicus OX=10116 GN=Anxa6 PE=1 SV=1 - [Q6IMZ3_RAT]	43	317	0.672542	0.150598	0.675067	0.326047	0.323399	0.482609	0.491504	0.560031
F1LMV6	Desmoplakin OS=Rattus norvegicus OX=10116 GN=Dsp PE=1 SV=1 - [F1LMV6_RAT]	69	135	-0.63036	-0.282862	-0.276217	-0.202106	0.260262	0.431232	0.439686	0.466078
B2B9A9	Ephrin B2 OS=Rattus norvegicus OX=10116 GN=Efnb2 PE=2 SV=1 - [B2B9A9_RAT]	1	1	0.171195	0.0264927	-0.524046	-0.465137	-0.409393	-0.45094	-0.230789	-0.294754
Q5XI66	Ss18 protein (Fragment) OS=Rattus norvegicus OX=10116 GN=Ss18 PE=2 SV=1 - [Q5XI66_RAT]	2	5	-0.161301	-0.285292	-0.228969	-0.0944346	-0.421471	-0.519896	-0.524231	-0.416805
D3ZT26	Similar to TatD DNase domain containing 2 OS=Rattus norvegicus OX=10116 GN=Tatdn2 PE=4 SV=1 - [D3ZT26_RAT]	2	2	0.85554	0.778738	0.0632505	0.466246	0.637149	0.689996	0.939519	0.948022
D3ZZL3	N-acetyl-alpha-glucosaminidase OS=Rattus norvegicus OX=10116 GN=Naglu PE=1 SV=2 - [D3ZZL3_RAT]	7	14	0.352994	-0.244877	0.92701	0.121027	0.0859505	0.453624	0.511386	0.553372
Q5BJP5	Transmembrane protein 230 OS=Rattus norvegicus OX=10116 GN=Tmem230 PE=1 SV=1 - [TM230_RAT]	1	2	0.555836	0.510738	0.401376	0.603628	0.548565	0.590872	0.669802	0.312629
P11654	Nuclear pore membrane glycoprotein 210 OS=Rattus norvegicus OX=10116 GN=Nup210 PE=1 SV=1 - [PO210_RAT]	31	78	0.180945	0.241183	0.891443	0.269866	0.347142	0.62332	0.636318	0.623476
F1M013	60S ribosomal protein L7a OS=Rattus norvegicus OX=10116 GN=Rpl7a PE=4 SV=2 - [F1M013_RAT]	8	46	-0.577746	0.113791	-0.321534	-0.651703	-0.575931	-0.617816	-0.636029	-0.604735
A0A0G2KA57	Ral GTPase-activating protein subunit beta OS=Rattus norvegicus OX=10116 GN=Ralgapb PE=1 SV=1 - [A0A0G2KA57_RAT]	1	1	-0.371944	0.322662	0.0253628	-0.165807	0.344334	0.568904	0.560363	0.157113
D3ZZB2	Peroxisomal biogenesis factor 1 OS=Rattus norvegicus OX=10116 GN=Pex1 PE=1 SV=1 - [D3ZZB2_RAT]	12	23	-0.453804	-0.158964	-0.264875	-0.489429	-0.368023	-0.256285	-0.310961	-0.23461
Q9ER24	Ataxin-10 OS=Rattus norvegicus OX=10116 GN=Atxn10 PE=1 SV=1 - [ATX10_RAT]	9	22	0.221406	0.301921	0.099763	0.0700096	0.25993	0.212957	0.272232	0.212344
D3ZP68	Cystatin OS=Rattus norvegicus OX=10116 GN=LOC689220 PE=3 SV=1 - [D3ZP68_RAT]	1	1	0.0561078	-0.718918	0.245851	0.70742	-0.835441	-1.4907	-0.803547
B4F795	Choline transporter-like protein 2 OS=Rattus norvegicus OX=10116 GN=Slc44a2 PE=2 SV=1 - [CTL2_RAT]	3	4	0.473896	0.314706	0.488989	0.797653	0.508748	0.807411	0.563327	0.321057
Q0ZFS4	Mitochondrial ribosomal protein S33 OS=Rattus norvegicus OX=10116 GN=Mrps33 PE=1 SV=1 - [Q0ZFS4_RAT]	1	2	-0.358891	0.286671	-0.279753	-0.318696	-0.405487	-0.562019	-0.429867	-0.482341
D3ZF26	Tankyrase 1-binding protein 1 OS=Rattus norvegicus OX=10116 GN=Tnks1bp1 PE=1 SV=1 - [D3ZF26_RAT]	24	62	-0.0900347	-0.292842	-0.335805	-0.154626	-0.307096	-0.425837	-0.38117	-0.457312
P80254	D-dopachrome decarboxylase OS=Rattus norvegicus OX=10116 GN=Ddt PE=1 SV=3 - [DOPD_RAT]	1	2	1.75566	1.17035	0.83422	-0.0790724	0.82074	1.29354	1.17788	1.0805
A0A0G2K6R7	WASH complex subunit 1 OS=Rattus norvegicus OX=10116 GN=Washc1 PE=1 SV=1 - [A0A0G2K6R7_RAT]	2	4	-0.61493	-0.463876	-0.541452	-0.582987	-0.363008	-0.289682	-0.374419	-0.487527
A0A0G2KA12	Kinesin-like protein KIF1B OS=Rattus norvegicus OX=10116 GN=Kif1b PE=1 SV=1 - [A0A0G2KA12_RAT]	1	5	-0.33276	-0.2769	-0.491256	-0.0664773	-0.0116974	-0.455424	-0.579059	-0.843115
M0R7K1	Protein lin-7 homolog OS=Rattus norvegicus OX=10116 GN=Lin7a PE=1 SV=2 - [M0R7K1_RAT]	5	27	0.753793	0.663001	0.678829	0.78842	0.611412	0.530618	0.518946	0.351502
D3ZCA0	Pyridoxal phosphate homeostasis protein OS=Rattus norvegicus OX=10116 GN=Plpbp PE=1 SV=1 - [D3ZCA0_RAT]	6	15	0.76176	0.272444	0.385683	0.408274	0.241717	0.165543	0.14086	0.222716
Q9ES75	Proline-rich acidic protein 1 OS=Rattus norvegicus OX=10116 GN=Prap1 PE=2 SV=1 - [PRAP1_RAT]	2	6	-0.300491	-0.804398	-0.618734	-0.853811	-0.752342	-0.616684	-0.707157	-0.642345
Q499T2	Gamma-interferon-inducible lysosomal thiol reductase OS=Rattus norvegicus OX=10116 GN=Ifi30 PE=2 SV=1 - [GILT_RAT]	1	2	0.45134	0.245012	0.0911491	0.529041	0.388543	0.383563	0.393382	0.189155
Q8VHI8	Vesicle transport protein SEC20 OS=Rattus norvegicus OX=10116 GN=Bnip1 PE=2 SV=1 - [SEC20_RAT]	4	9	0.28382	0.133179	0.342854	0.2957	0.14124	0.319162	0.269476	0.296925
Q5RKL4	Dimethylglycine dehydrogenase OS=Rattus norvegicus OX=10116 GN=Dmgdh PE=1 SV=1 - [Q5RKL4_RAT]	15	37	-0.336657	0.142154	-0.129029	-0.622317	-0.664054	-0.424377	-0.455818	-0.395521
G3V9Z6	Septin 8 (Predicted) OS=Rattus norvegicus OX=10116 GN=Sept8 PE=1 SV=1 - [G3V9Z6_RAT]	3	15	-0.0439342	-0.374073	-0.322353	-0.151283	-0.0717345	-0.0438076	-0.0370206	-0.0371889
A0A0G2JSV5	3-hydroxyanthranilate 3,4-dioxygenase OS=Rattus norvegicus OX=10116 GN=Haao PE=1 SV=1 - [A0A0G2JSV5_RAT]	12	36	0.648454	0.210104	0.100027	0.260337	0.135521	0.124359	0.0202311	0.131939
Q3KR55	RCG60540, isoform CRA_a OS=Rattus norvegicus OX=10116 GN=U2af1 PE=1 SV=1 - [Q3KR55_RAT]	4	8	-0.0531263	0.220622	0.0823051	0.243343	0.312529	0.29659	0.2549	0.265124
B5DF46	Phosphomannomutase OS=Rattus norvegicus OX=10116 GN=Pmm2 PE=1 SV=1 - [B5DF46_RAT]	5	12	-0.325428	0.189177	-0.302587	-0.313096	-0.286466	-0.364504	-0.419584	-0.403449
Q9EPJ3	28S ribosomal protein S26, mitochondrial OS=Rattus norvegicus OX=10116 GN=Mrps26 PE=1 SV=1 - [RT26_RAT]	6	20	0.302161	0.196948	-0.0902425	0.138145	-0.215577	-0.225141	-0.242835	-0.312881
D3ZXP1	Tetratricopeptide repeat domain 28 OS=Rattus norvegicus OX=10116 GN=Ttc28 PE=1 SV=3 - [D3ZXP1_RAT]	2	3	-0.383025	-0.829086	-0.152579		-1.29851	-1.21527	-0.651233	-0.693194
A0A0G2K1G6	Ferritin OS=Rattus norvegicus OX=10116 GN=LOC691895 PE=3 SV=1 - [A0A0G2K1G6_RAT]	1	1	-0.142636	-0.241622	0.830536	0.191462	0.758964	1.07937	0.969049	1.04082
P0C643	RAS guanyl-releasing protein 2 OS=Rattus norvegicus OX=10116 GN=Rasgrp2 PE=1 SV=1 - [GRP2_RAT]	3	3	0.105601	-0.0958562	0.103358	-0.201272	0.53002	0.673536	0.444803	0.535623
Q6AYH5	Dynactin subunit 2 OS=Rattus norvegicus OX=10116 GN=Dctn2 PE=1 SV=1 - [DCTN2_RAT]	16	57	-0.0493269	-0.164022	-0.42501	-0.22941	-0.294547	-0.290725	-0.250252	-0.317256
Q505J3	WSC domain-containing protein 1 OS=Rattus norvegicus OX=10116 GN=Wscd1 PE=2 SV=1 - [WSCD1_RAT]	1	2	-0.764817	-0.341267	-0.905971	-0.638622	-0.413116	-0.685139	-0.497545	-0.663345
P43165	Carbonic anhydrase 5A, mitochondrial OS=Rattus norvegicus OX=10116 GN=Ca5a PE=1 SV=1 - [CAH5A_RAT]	3	4	-0.205753	-0.141512	0.0601911	-0.553117	-0.766696	-0.658613	-0.842574	-0.859808
B1H249	Glucosamine-phosphate N-acetyltransferase 1 OS=Rattus norvegicus OX=10116 GN=Gnpnat1 PE=1 SV=1 - [B1H249_RAT]	4	7	1.18143	0.967787	0.929517	1.02868	0.854948	0.623907	0.522409	0.525694
A0A0G2JUA5	AHNAK nucleoprotein OS=Rattus norvegicus OX=10116 GN=Ahnak PE=1 SV=1 - [A0A0G2JUA5_RAT]	187	1478	-0.845807	-0.643473	-0.464602	-0.523076	-0.422574	-0.342113	-0.377625	-0.344441
Q4KM87	Actin-like 6A OS=Rattus norvegicus OX=10116 GN=Actl6a PE=1 SV=1 - [Q4KM87_RAT]	10	31	0.0856419	0.100319	0.572322	0.0835577	0.188246	0.323667	0.356421	0.33601
F1LXS3	Matrilin 2 OS=Rattus norvegicus OX=10116 GN=Matn2 PE=4 SV=3 - [F1LXS3_RAT]	3	5	-0.582814	-0.654331	-0.614525	-0.655794	-0.29634	-0.238147	-0.187765	-0.17142
Q4FZR5	Adrenocortical dysplasia protein homolog OS=Rattus norvegicus OX=10116 GN=Acd PE=1 SV=1 - [ACD_RAT]	2	2	0.58199	0.209125	0.823474	0.634728	0.659648	0.851612	0.631184	0.732011
D3ZF44	Similar to stefin A2 OS=Rattus norvegicus OX=10116 GN=LOC689230 PE=4 SV=1 - [D3ZF44_RAT]	3	14	1.04045	0.153847	0.289439	0.60421	0.769363	0.892323	0.789787	0.646603
Q9QX79	Fetuin-B OS=Rattus norvegicus OX=10116 GN=Fetub PE=2 SV=2 - [FETUB_RAT]	7	35	-0.181211	-0.485886	-0.347105	-0.278202	-0.436898	-0.58153	-0.597428	-0.496934
D3Z981	Plexin A1 OS=Rattus norvegicus OX=10116 GN=Plxna1 PE=1 SV=3 - [D3Z981_RAT]	1	6	-0.40656	0.308941	0.725009	0.103137	0.175449	0.183375	0.271172	0.513945
D4ADF6	Zinc finger FYVE-type-containing 16 OS=Rattus norvegicus OX=10116 GN=Zfyve16 PE=1 SV=2 - [D4ADF6_RAT]	1	1	0.130129	0.280786	-0.580988	-0.378438	-0.534977	-0.361341	-0.349752	-0.402992
Q8VI04	Isoaspartyl peptidase/L-asparaginase OS=Rattus norvegicus OX=10116 GN=Asrgl1 PE=1 SV=1 - [ASGL1_RAT]	4	8	0.622109	-0.00503641	0.146253	0.211381	0.238248	0.317199	0.191099	0.25391
P09650	Mast cell protease 1 OS=Rattus norvegicus OX=10116 GN=Mcpt1 PE=1 SV=3 - [MCPT1_RAT]	2	2	-0.735252	-0.499641	-0.359827	-0.203866	-0.871192	-1.17086	-1.14187	-0.774408
D4A201	Uncharacterized protein OS=Rattus norvegicus OX=10116 PE=4 SV=1 - [D4A201_RAT]	1	1	-0.661115	-0.0582959	-0.77325	-0.729321	-0.714536	-0.901611	-0.940439	-0.608702
Q5PQR5	U3 small nucleolar ribonucleoprotein protein IMP4 OS=Rattus norvegicus OX=10116 GN=Imp4 PE=2 SV=1 - [IMP4_RAT]	3	5	-0.190598	0.0278373	0.0986867	0.0678307	0.153107	0.288899	0.237727	0.283247
P26772	10 kDa heat shock protein, mitochondrial OS=Rattus norvegicus OX=10116 GN=Hspe1 PE=1 SV=3 - [CH10_RAT]	11	588	0.332497	0.255477	-0.0685443	0.0999796	-0.362841	-0.641376	-0.682069	-0.640026
A0A0G2JSV3	Ribose-phosphate pyrophosphokinase I -like OS=Rattus norvegicus OX=10116 GN=LOC314140 PE=1 SV=1 - [A0A0G2JSV3_RAT]	6	16	-0.278137	-0.171528	-0.207469	-0.271792	-0.207544	-0.129951	-0.249499	-0.311396
F1M357	Mov10 RISC complex RNA helicase-like 1 OS=Rattus norvegicus OX=10116 GN=Mov10l1 PE=4 SV=2 - [F1M357_RAT]	1	3	0.772937	0.0424626	-0.0376284	0.28404	0.337383	0.221796	0.302876	0.302201
F1LR93	Sodium/bile acid cotransporter 5 OS=Rattus norvegicus OX=10116 GN=Slc10a5 PE=4 SV=1 - [F1LR93_RAT]	1	1	-0.998317	-1.05981	-0.630233	-0.841011	-0.875659	-0.497866	-0.377326	-0.470887
G3V715	Non-specific serine/threonine protein kinase OS=Rattus norvegicus OX=10116 GN=Prkaa2 PE=1 SV=1 - [G3V715_RAT]	1	2	-0.444834	0.442785	0.430936	-0.0430606	-0.671554	-0.844186	-0.797392	-0.579614
Q6AYB4	Heat shock 70 kDa protein 14 OS=Rattus norvegicus OX=10116 GN=Hspa14 PE=2 SV=1 - [HSP7E_RAT]	2	4	0.738102	0.391072	0.274594	0.30334	0.242059	0.373331	0.577548	0.63749
D3ZBG8	PAP associated domain containing 5 (Predicted) OS=Rattus norvegicus OX=10116 GN=Tent4b PE=4 SV=1 - [D3ZBG8_RAT]	1	2	-2.09416		-0.214687		-2.75465	-1.89525	-2.05712	-2.10267
F1LRY5	RCG45398 OS=Rattus norvegicus OX=10116 GN=Sardh PE=1 SV=2 - [F1LRY5_RAT]	26	79	0.353922	0.103871	0.172814	-0.0733919	-0.186423	-0.180431	-0.197616	-0.164324
A0A0G2JW65	Uncharacterized protein OS=Rattus norvegicus OX=10116 PE=4 SV=1 - [A0A0G2JW65_RAT]	1	1	-0.216121	-0.327267	-0.160456	0.194561	-0.639737	-0.841743	-0.91392	-1.0991
D3Z8H5	Uncharacterized protein OS=Rattus norvegicus OX=10116 PE=4 SV=3 - [D3Z8H5_RAT]	1	4	-0.334311	-0.562043	0.0584967	0.104632	-0.582657	-0.582674	-0.375928	-0.353302
A0A0G2K9D7	Uncharacterized protein OS=Rattus norvegicus OX=10116 PE=4 SV=1 - [A0A0G2K9D7_RAT]	6	12	0.217244	0.0754193	0.288626	0.319862	0.199992	0.262903	0.178842	0.315588
A0A0G2JUS0	Protein quaking-like OS=Rattus norvegicus OX=10116 GN=LOC108348175 PE=4 SV=1 - [A0A0G2JUS0_RAT]	6	11	-0.133114	0.0180219	-0.337059	-0.153098	-0.121925	-0.181847	-0.170946	-0.226878
Q66H45	Tetratricopeptide repeat protein 36 OS=Rattus norvegicus OX=10116 GN=Ttc36 PE=1 SV=1 - [TTC36_RAT]	1	1	-0.511949	-0.950904	-1.24666	-1.59558	-1.01568	-0.462393	-0.572693	-0.328491
Q66H95	Disrupted in renal carcinoma protein 2 homolog OS=Rattus norvegicus OX=10116 GN=Dirc2 PE=2 SV=1 - [DIRC2_RAT]	1	1	-0.638166	-0.349154	-0.205988	0.397461	-0.0126979	-0.245055	-0.324934	-0.384876
Q5U4F3	Protein FAM107B OS=Rattus norvegicus OX=10116 GN=Fam107b PE=2 SV=1 - [F107B_RAT]	4	8	-0.445259	-0.213645	-0.600741	-0.252697	-0.396309	-0.59081	-0.716189	-0.767352
Q05343	Retinoic acid receptor RXR-alpha OS=Rattus norvegicus OX=10116 GN=Rxra PE=1 SV=1 - [RXRA_RAT]	5	14	-0.164595	-0.183166	0.178258	0.110217	0.127618	0.349637	0.385201	0.413909
D3ZW49	TMEM9 domain family, member B OS=Rattus norvegicus OX=10116 GN=Tmem9b PE=1 SV=1 - [D3ZW49_RAT]	1	2	0.29675	0.283099	0.312465	0.0736657	0.104487	0.267553	0.240967	0.317448
F1LTB8	UDP-glucuronosyltransferase OS=Rattus norvegicus OX=10116 GN=RGD1559459 PE=1 SV=2 - [F1LTB8_RAT]	6	29	-1.10544	-0.414471	-0.518182	-0.977083	-0.761658	-0.596831	-0.582735	-0.774526
P62634	Cellular nucleic acid-binding protein OS=Rattus norvegicus OX=10116 GN=Cnbp PE=2 SV=1 - [CNBP_RAT]	4	34	0.269842	0.162782	-0.61986	-0.168197	-0.399306	-0.59395	-0.687187	-0.83198
Q6P6Q7	Signal transducer and activator of transcription OS=Rattus norvegicus OX=10116 GN=Stat1 PE=2 SV=1 - [Q6P6Q7_RAT]	8	17	-0.145176	-0.469693	-0.514922	-0.467518	-0.528565	-0.293484	-0.374798	-0.180157
F1M065	Junctional adhesion molecule 2 OS=Rattus norvegicus OX=10116 GN=Jam2 PE=1 SV=3 - [F1M065_RAT]	2	2	-0.021164	0.726808	0.854481	0.774744	0.875553	0.852943	0.649451	1.45048
D4AA06	Nuclear receptor binding SET domain protein 1 (Predicted), isoform CRA_a OS=Rattus norvegicus OX=10116 GN=Nsd1 PE=1 SV=1 - [D4AA06_RAT]	9	9	-0.37604	-0.531731	-0.258658	-0.174256	-0.156799	-0.363673	-0.146506	-0.229004
B2GV96	Coiled-coil domain-containing 115 OS=Rattus norvegicus OX=10116 GN=Ccdc115 PE=1 SV=1 - [B2GV96_RAT]	1	2	0.67506	0.701381	0.510518	0.528825	0.37332	0.208555	0.290095	0.3172
F1M8I7	Ena/VASP-like protein OS=Rattus norvegicus OX=10116 GN=Evl PE=1 SV=1 - [F1M8I7_RAT]	4	16	-0.412114	-0.384415	-0.181602	-0.18684	-0.38347	-0.333997	-0.555114	-0.585807
Q9ET45	BCL2-interacting protein 3 OS=Rattus norvegicus OX=10116 GN=Bnip3 PE=1 SV=1 - [Q9ET45_RAT]	3	8	1.04875	1.40233	1.26097	1.11983	0.662869	0.387788	0.412162	0.297359
B2GV18	Bms1 protein OS=Rattus norvegicus OX=10116 GN=Bms1 PE=2 SV=1 - [B2GV18_RAT]	5	7	0.0452072	0.00444292	0.466945	0.443366	0.233797	0.265344	0.145527	0.241434
P07154	Cathepsin L1 OS=Rattus norvegicus OX=10116 GN=Ctsl PE=1 SV=2 - [CATL1_RAT]	11	35	-0.0216793	0.0485083	0.00940927	0.102007	-0.222126	-0.40114	-0.383986	-0.446036
Q08163	Adenylyl cyclase-associated protein 1 OS=Rattus norvegicus OX=10116 GN=Cap1 PE=1 SV=3 - [CAP1_RAT]	13	46	0.551198	-0.0488976	0.124476	0.0870452	0.133752	0.262222	0.291201	0.24609
D3ZA38	Myosin binding protein C, fast-type (Predicted) OS=Rattus norvegicus OX=10116 GN=Mybpc2 PE=1 SV=1 - [D3ZA38_RAT]	3	15	-0.478934	-0.324145	-0.263057	-0.209314	-0.535942	-0.565901	-0.61963	-0.517106
Q5FVN2	Transmembrane protein 41B OS=Rattus norvegicus OX=10116 GN=Tmem41b PE=2 SV=1 - [TM41B_RAT]	2	5	-0.83097	1.43628	0.353931	-0.237564	-1.07983	-1.41691	-0.935596	-0.58482
Q810U0	Coiled-coil domain-containing protein 50 OS=Rattus norvegicus OX=10116 GN=Ccdc50 PE=2 SV=1 - [CCD50_RAT]	4	10	-0.109574	-0.212834	-0.210997	0.0134932	-0.28856	-0.201958	-0.374109	-0.215321
D3ZTF6	Phosphatidylinositol 3-kinase, C2 domain containing, alpha polypeptide (Predicted), isoform CRA_a OS=Rattus norvegicus OX=10116 GN=Pik3c2a PE=1 SV=1 - [D3ZTF6_RAT]	5	9	0.151963	0.11395	0.509455	0.434724	0.397078	0.270634	0.15975	0.26031
A0A0G2K791	Mitochondrial ribosomal protein L33 OS=Rattus norvegicus OX=10116 GN=Mrpl33 PE=1 SV=1 - [A0A0G2K791_RAT]	1	2	0.312575	0.453527	-0.183055	-0.0890282	-0.111466	-0.464607	-0.558899	-0.33606
F7FF10	Cytochrome P450, family 2, subfamily j, polypeptide 4 OS=Rattus norvegicus OX=10116 GN=Cyp2j4 PE=1 SV=2 - [F7FF10_RAT]	6	10	-0.378538	-0.490814	-0.462548	-0.675055	-0.423836	-0.580853	-0.462951	-0.425198
G3V972	Gem (Nuclear organelle) associated protein 6, isoform CRA_a OS=Rattus norvegicus OX=10116 GN=Gemin6 PE=1 SV=1 - [G3V972_RAT]	3	4	0.184453	-0.317896	-1.03036	-0.345389	-0.489865	-0.787236	-0.824134	-0.64286
B0BNA5	Coactosin-like protein OS=Rattus norvegicus OX=10116 GN=Cotl1 PE=1 SV=1 - [COTL1_RAT]	8	19	0.431876	0.104835	0.0783585	0.232243	0.302546	0.167387	0.0950665	0.137968
Q7M0A0	cAMP response element-binding protein 11.2K, 16K (Fragment) OS=Rattus norvegicus OX=10116 PE=1 SV=1 - [Q7M0A0_RAT]	1	6	-0.136323	-0.341335	-0.568911	-0.241125	-0.283267	-0.400848	-0.413506	-0.40674
P09527	Ras-related protein Rab-7a OS=Rattus norvegicus OX=10116 GN=Rab7a PE=1 SV=2 - [RAB7A_RAT]	13	90	0.290597	0.428731	0.524572	0.248438	0.293055	0.392457	0.339976	0.394389
B2GV38	Ubiquitin-like protein 4A OS=Rattus norvegicus OX=10116 GN=Ubl4a PE=2 SV=1 - [UBL4A_RAT]	6	9	0.444007	0.213013	-0.0276561	0.264573	0.300256	0.122363	0.125454	0.117122
A0A0G2K9Q9	Keratin, type I cytoskeletal 17 OS=Rattus norvegicus OX=10116 GN=Krt17 PE=1 SV=1 - [A0A0G2K9Q9_RAT]	7	130	-2.21564	-2.34088	-2.08795	-1.89261	-2.18549	-1.89427	-1.79575	-1.97646
F1LQ92	Protein sel-1 homolog 1 OS=Rattus norvegicus OX=10116 GN=Sel1l PE=1 SV=1 - [F1LQ92_RAT]	7	18	0.362267	0.454119	0.627715	0.257387	0.311315	0.34168	0.451172	0.451606
P14669	Annexin A3 OS=Rattus norvegicus OX=10116 GN=Anxa3 PE=1 SV=4 - [ANXA3_RAT]	13	52	0.547963	-0.0751291	0.295388	0.174971	0.222997	0.347267	0.256961	0.412949
D3ZA21	Pleckstrin homology and RhoGEF domain-containing G3 OS=Rattus norvegicus OX=10116 GN=Plekhg3 PE=1 SV=3 - [D3ZA21_RAT]	6	11	0.306304	0.422708	0.599202	0.891758	0.586319	0.356855	0.475438	0.376427
P83868	Prostaglandin E synthase 3 OS=Rattus norvegicus OX=10116 GN=Ptges3 PE=1 SV=2 - [TEBP_RAT]	4	22	-0.12334	-0.134282	-0.671232	-0.201222	-0.340789	-0.526753	-0.512141	-0.629693
B2RYW4	Mitochondrial ribosomal protein L53 OS=Rattus norvegicus OX=10116 GN=Mrpl53 PE=1 SV=1 - [B2RYW4_RAT]	3	8	0.146148	0.209629	-0.0914515	0.176616	-0.05919	-0.232261	-0.167967	-0.14796
D4A3Q2	Stromal antigen 1 OS=Rattus norvegicus OX=10116 GN=Stag1 PE=1 SV=1 - [D4A3Q2_RAT]	6	16	0.0427614	-0.00651615	0.561041	0.429219	0.212179	0.240234	0.395511	0.332983
Q5M878	Serum amyloid A protein OS=Rattus norvegicus OX=10116 GN=Saa4 PE=1 SV=1 - [Q5M878_RAT]	4	8	0.437045	0.784686	0.612485	0.554167	0.421493	0.235979	0.162232	0.419208
D3ZUV9	CCR4-NOT transcription complex, subunit 3 OS=Rattus norvegicus OX=10116 GN=Cnot3 PE=1 SV=2 - [D3ZUV9_RAT]	7	14	-0.200022	-0.366485	-0.493044	-0.854761	-0.466368	-0.343088	-0.326463	-0.283041
Q2LC86	Numb isoform o/o OS=Rattus norvegicus OX=10116 GN=rCG_20893 PE=2 SV=1 - [Q2LC86_RAT]	5	12	0.0171366	-0.049364	-0.174684	0.00964851	-0.241334	-0.364277	-0.510384	-0.252851
Q5PPJ6	Leucyl-tRNA synthetase OS=Rattus norvegicus OX=10116 GN=Lars PE=1 SV=1 - [Q5PPJ6_RAT]	6	11	-0.420051	-0.109338	-0.425434	-0.409246	-0.305302	-0.417393	-0.300889	-0.421918
A0A0G2JTH1	Uncharacterized protein OS=Rattus norvegicus OX=10116 GN=Nkrfl PE=4 SV=1 - [A0A0G2JTH1_RAT]	2	3	0.29205	0.435122	0.462583	0.624315	0.310347	0.253996	0.193731	0.0379117
B0BNB5	LOC683983 protein OS=Rattus norvegicus OX=10116 GN=Nup43 PE=1 SV=1 - [B0BNB5_RAT]	8	22	0.247697	-0.303368	0.423767	0.634039	0.356903	0.531843	0.489556	0.479191
P61203	COP9 signalosome complex subunit 2 OS=Rattus norvegicus OX=10116 GN=Cops2 PE=1 SV=1 - [CSN2_RAT]	5	9	0.776529	0.479631	0.0957491	0.215539	0.422172	0.490869	0.545598	0.434184
A0A023ILN6	RT1-DMa (Fragment) OS=Rattus norvegicus OX=10116 GN=DMA1 PE=2 SV=1 - [A0A023ILN6_RAT]	1	2	0.3303	-0.0504364	0.49264	-0.0261258	0.0910084	0.490727	0.438419	0.332465
B5DEJ5	Eefsec protein OS=Rattus norvegicus OX=10116 GN=Eefsec PE=1 SV=1 - [B5DEJ5_RAT]	4	7	-0.14703	0.0588347	-0.711514	-0.59146	-0.567471	-0.552323	-0.323388	-0.681736
Q02769	Squalene synthase OS=Rattus norvegicus OX=10116 GN=Fdft1 PE=2 SV=1 - [FDFT_RAT]	10	34	0.490928	0.920316	1.20519	0.459597	0.372467	0.560852	0.568746	0.622073
D4AAE9	CDGSH iron sulfur domain 2 OS=Rattus norvegicus OX=10116 GN=Cisd2 PE=1 SV=1 - [D4AAE9_RAT]	5	18	0.115959	0.184145	0.355596	0.162588	0.237636	0.320997	0.398691	0.481509
Q5BJN5	Mitochondrial intermembrane space import and assembly protein 40 OS=Rattus norvegicus OX=10116 GN=Chchd4 PE=2 SV=1 - [MIA40_RAT]	4	10	0.221257	0.053458	-0.0212948	-0.112793	-0.426293	-0.535229	-0.699865	-0.543151
D3ZM19	Ecotropic viral integration site 2B OS=Rattus norvegicus OX=10116 GN=Evi2b PE=1 SV=1 - [D3ZM19_RAT]	3	9	0.68583	0.0077523	0.528791	0.446334	0.71368	0.806178	0.853868	0.850424
E9PTW1	Secretory carrier-associated membrane protein OS=Rattus norvegicus OX=10116 GN=Scamp3 PE=1 SV=2 - [E9PTW1_RAT]	6	24	0.464086	0.529219	0.354361	0.125974	0.443355	0.567376	0.766111	0.372995
D3ZU21	Progesterone immunomodulatory-binding factor 1 OS=Rattus norvegicus OX=10116 GN=Pibf1 PE=1 SV=1 - [D3ZU21_RAT]	7	12	0.0789814	-0.207935	-0.148671	0.171821	0.17889	0.284822	0.245097	0.302227
O08779	CD44 protein OS=Rattus norvegicus OX=10116 GN=Cd44 PE=2 SV=1 - [O08779_RAT]	7	20	-0.339914	-0.403317	-0.147303	-0.503137	0.160468	0.448686	0.447875	0.42483
A0A0G2QBZ8	LUC7-like (S. cerevisiae) OS=Rattus norvegicus OX=10116 GN=Luc7l PE=2 SV=1 - [A0A0G2QBZ8_RAT]	2	21	-0.110395	0.131011	-0.0667444	0.223356	0.265615	0.220286	0.163468	0.165636
M0R5V7	Murinoglobulin-2 OS=Rattus norvegicus OX=10116 GN=Mug2 PE=1 SV=2 - [M0R5V7_RAT]	3	98	0.193515	-0.028609	0.316604	0.530655	-0.262166	-0.698704	-0.692942	-0.749712
Q3SWS8	mRNA export factor OS=Rattus norvegicus OX=10116 GN=Rae1 PE=1 SV=1 - [RAE1L_RAT]	11	47	-0.15013	-0.176439	0.346817	0.493212	0.314453	0.224431	0.220026	0.291572
P12843	Insulin-like growth factor-binding protein 2 OS=Rattus norvegicus OX=10116 GN=Igfbp2 PE=1 SV=3 - [IBP2_RAT]	7	18	0.271407	0.362606	0.0329261	0.0890107	-0.439492	-0.685289	-0.787348	-0.775038
D3ZA78	TPX2, microtubule nucleation factor OS=Rattus norvegicus OX=10116 GN=Tpx2 PE=1 SV=1 - [D3ZA78_RAT]	10	17	-0.458374	-0.628702	-0.515953	0.0617158	-0.233014	-0.414607	-0.873537	-0.918041
B5DFK5	Hip1r protein OS=Rattus norvegicus OX=10116 GN=Hip1r PE=2 SV=1 - [B5DFK5_RAT]	7	12	-0.0978549	-0.447616	0.04312	-0.219611	-0.436527	-0.357509	-0.32534	-0.138889
D4A383	Protein tweety homolog OS=Rattus norvegicus OX=10116 GN=Ttyh3 PE=1 SV=1 - [D4A383_RAT]	1	2	0.323303	0.3906	0.291818	0.0620645	0.244165	0.490885	0.665745	0.325589
Q80ZA3	Alpha-2 antiplasmin OS=Rattus norvegicus OX=10116 GN=Serpinf1 PE=1 SV=1 - [Q80ZA3_RAT]	8	21	-1.32128	-1.55305	-1.3444	-1.35552	-0.692939	-0.347248	-0.442655	-0.418406
A0A0G2K548	A-kinase-anchoring protein 9 OS=Rattus norvegicus OX=10116 GN=Akap9 PE=1 SV=1 - [A0A0G2K548_RAT]	49	102	0.198817	0.127177	0.120613	0.241361	0.264968	0.23059	0.224622	0.181934
A0A0G2K648	WD repeat-containing protein 61 OS=Rattus norvegicus OX=10116 GN=Wdr61 PE=1 SV=1 - [A0A0G2K648_RAT]	8	18	0.71065	0.244425	0.219618	0.648904	0.433568	0.273856	0.292004	0.275749
D3Z8Q7	Family with sequence similarity 96, member B OS=Rattus norvegicus OX=10116 GN=Ciao2b PE=1 SV=1 - [D3Z8Q7_RAT]	2	3	0.117527	0.0942875	-0.206741	-0.652765	-0.659478	-0.263261	-0.3208	-0.125371
M0R9L2	Ciliary neurotrophic factor receptor subunit alpha OS=Rattus norvegicus OX=10116 GN=Cntfr PE=4 SV=1 - [M0R9L2_RAT]	1	2	0.228902	0.15942	0.551918	0.442356	0.507869	0.648371	0.531101	0.459064
D4A830	Pyrophosphatase (inorganic) 2 OS=Rattus norvegicus OX=10116 GN=Ppa2 PE=1 SV=2 - [D4A830_RAT]	12	26	0.178928	0.0571388	-0.246418	0.075935	-0.154554	-0.325512	-0.355571	-0.368426
Q5BJT7	Coiled-coil domain-containing protein 93 OS=Rattus norvegicus OX=10116 GN=Ccdc93 PE=1 SV=1 - [CCD93_RAT]	2	4	-0.113458	0.30792	0.255715	0.178207	0.241428	0.0790068	0.0662718	0.157123
Q5BJP2	Spliceosome-associated protein CWC15 homolog OS=Rattus norvegicus OX=10116 GN=Cwc15 PE=1 SV=1 - [CWC15_RAT]	1	14	-0.710935	-0.385265	-0.405555	-0.0112012	-0.268225	-0.326096	-0.54328	-0.669547
Q4FZY0	EF-hand domain-containing protein D2 OS=Rattus norvegicus OX=10116 GN=Efhd2 PE=1 SV=1 - [EFHD2_RAT]	11	33	0.0674184	0.132023	-0.11001	0.0225751	-0.214607	-0.337124	-0.401278	-0.429567
A0A0H2UI35	Homer protein homolog 1 OS=Rattus norvegicus OX=10116 GN=Homer1 PE=1 SV=1 - [A0A0H2UI35_RAT]	3	4	0.0796019	0.340189	0.217941	0.145432	-0.0882505	-0.268153	-0.174356	-0.201704
A0A0G2K9A2	Arp2/3 complex 34 kDa subunit OS=Rattus norvegicus OX=10116 GN=Arpc2 PE=1 SV=1 - [A0A0G2K9A2_RAT]	11	27	0.169723	0.111108	0.386935	0.0982039	0.383224	0.599677	0.519878	0.54409
D4A757	Major facilitator superfamily domain-containing 6-like OS=Rattus norvegicus OX=10116 GN=Mfsd6l PE=4 SV=2 - [D4A757_RAT]	1	3	0.920771	0.519046	0.371664	0.237937	0.594672	0.793965	0.879164	0.560457
D3ZJB8	RBR-type E3 ubiquitin transferase OS=Rattus norvegicus OX=10116 GN=Arih2 PE=1 SV=1 - [D3ZJB8_RAT]	2	4	0.654482	0.548397	0.29224	0.050338	0.039056	0.540753	0.642733	0.767033
Q6P6Q2	Keratin, type II cytoskeletal 5 OS=Rattus norvegicus OX=10116 GN=Krt5 PE=1 SV=1 - [K2C5_RAT]	12	141	-1.59636	-1.50007	-1.55884	-1.44307	-1.59238	-1.76759	-1.77183	-1.59317
D3ZV33	Pogo transposable element with ZNF domain (Predicted), isoform CRA_a OS=Rattus norvegicus OX=10116 GN=Pogz PE=1 SV=1 - [D3ZV33_RAT]	5	11	0.029409	-0.0312108	0.0747719	0.314062	0.217928	0.103349	0.112136	0.31358
Q5U2Z4	Nuclear factor kappa B subunit 2 OS=Rattus norvegicus OX=10116 GN=Nfkb2 PE=1 SV=1 - [Q5U2Z4_RAT]	1	1	-1.42396			-0.627716	-0.998186	-1.2579	-0.921853	-1.69747
Q63302	Transcription factor EC OS=Rattus norvegicus OX=10116 GN=Tfec PE=1 SV=2 - [TFEC_RAT]	1	1	0.200428	0.0812956	-0.560341	0.0109253	0.390739	0.353975	0.3442	0.163223
Q6AXU3	Interferon-stimulated 20 kDa exonuclease-like 2 OS=Rattus norvegicus OX=10116 GN=Isg20l2 PE=2 SV=1 - [I20L2_RAT]	1	2	0.294876	0.0476059	-0.138503	0.029561	0.239739	0.541351	0.405276	0.353881
D3ZIP3	Erythrocyte membrane protein band 4.1 OS=Rattus norvegicus OX=10116 GN=Epb41 PE=1 SV=1 - [D3ZIP3_RAT]	11	24	0.385782	0.279384	0.433608	0.356933	0.168186	0.288873	0.301637	0.137246
Q00981	Ubiquitin carboxyl-terminal hydrolase isozyme L1 OS=Rattus norvegicus OX=10116 GN=Uchl1 PE=1 SV=2 - [UCHL1_RAT]	2	4	-0.914865	-1.16268	-1.23606	-0.692938	-0.595346	-0.747772	-0.848815	-0.661435
D3ZMR2	UHRF1-binding protein 1 OS=Rattus norvegicus OX=10116 GN=Uhrf1bp1 PE=1 SV=3 - [D3ZMR2_RAT]	2	4	0.136763	-0.02238	-0.112881	-0.0896915	-0.560635	-0.539276	-0.659087	-0.426256
Q5EBD4	Dcps protein (Fragment) OS=Rattus norvegicus OX=10116 GN=Dcps PE=2 SV=1 - [Q5EBD4_RAT]	7	15	1.01753	0.293972	-0.0094142	0.148746	0.176474	0.209685	0.198919	0.433209
E2RUH2	Ribonuclease inhibitor OS=Rattus norvegicus OX=10116 GN=Rnh1 PE=1 SV=1 - [E2RUH2_RAT]	8	32	0.122506	0.0359422	-0.286226	-0.107189	-0.169133	-0.438589	-0.278206	-0.307672
A0A0H2UHH2	Serum amyloid P-component OS=Rattus norvegicus OX=10116 GN=Apcs PE=1 SV=1 - [A0A0H2UHH2_RAT]	8	27	-0.657969	-1.3426	-1.12384	-0.597382	-0.802182	-0.778345	-0.719904	-0.750031
Q5M820	MORF4 family-associated protein 1 OS=Rattus norvegicus OX=10116 GN=Mrfap1 PE=1 SV=1 - [MOFA1_RAT]	1	3	-0.186501	-0.344693	-0.293078	-0.0607581	-0.453667	-0.693649	-0.657564	-0.525
P62963	Profilin-1 OS=Rattus norvegicus OX=10116 GN=Pfn1 PE=1 SV=2 - [PROF1_RAT]	8	51	0.501973	0.274581	0.0596011	0.110555	0.225512	0.251048	0.205384	0.126915
Q66H58	Integrator complex subunit 14 OS=Rattus norvegicus OX=10116 GN=Ints14 PE=2 SV=1 - [INT14_RAT]	3	5	-0.114632	0.0579531	0.125311	0.0905075	0.434356	0.503766	0.488461	0.470124
A0A0G2JV84	Glutamic--pyruvic transaminase 2 OS=Rattus norvegicus OX=10116 GN=Gpt2 PE=1 SV=1 - [A0A0G2JV84_RAT]	3	7	0.175425	0.84416	0.325104	0.0662188	0.214871	0.258781	0.262345	0.196437
P28480	T-complex protein 1 subunit alpha OS=Rattus norvegicus OX=10116 GN=Tcp1 PE=1 SV=1 - [TCPA_RAT]	24	125	-0.0858433	0.0581554	0.291179	-0.0376847	0.311399	0.672463	0.67445	0.663047
D3ZGP6	Kielin/chordin-like protein OS=Rattus norvegicus OX=10116 GN=Kcp PE=4 SV=2 - [D3ZGP6_RAT]	2	3	-0.282675	-0.129018	0.192768	-0.152618	0.253372	0.515843	0.535823	0.416156
D3ZW59	Integrin beta 1 binding protein 2 (Predicted) OS=Rattus norvegicus OX=10116 GN=Itgb1bp2 PE=4 SV=1 - [D3ZW59_RAT]	1	3	-3.25018		0.268332		-2.81906	-2.22824	-2.04259	-1.83591
G3V718	Whey acidic protein OS=Rattus norvegicus OX=10116 GN=Wap PE=4 SV=1 - [G3V718_RAT]	2	4	-1.38401	-1.45329	-1.547	-1.63991	-1.80027	-2.03513	-2.27849	-2.24222
Q68G38	Torsin-1A OS=Rattus norvegicus OX=10116 GN=Tor1a PE=1 SV=1 - [TOR1A_RAT]	3	8	-0.0278965	0.204582	0.432871	0.171529	0.203526	0.416662	0.303833	0.390601
D4ACF2	Tripartite motif protein 21 (Predicted), isoform CRA_a OS=Rattus norvegicus OX=10116 GN=Trim21 PE=1 SV=2 - [D4ACF2_RAT]	1	2	0.00135899	-0.340693	-0.378528	-0.18618	-0.41857	-0.338796	-0.363501	-0.304636
D3ZHV7	Serine dehydratase-like OS=Rattus norvegicus OX=10116 GN=Sdsl PE=1 SV=3 - [D3ZHV7_RAT]	2	3	0.852761	0.129153	0.0959888	-0.0247782	0.147626	0.431778	0.446061	0.485301
D3ZU64	VPS37B, ESCRT-I subunit OS=Rattus norvegicus OX=10116 GN=Vps37b PE=1 SV=1 - [D3ZU64_RAT]	2	4	0.149836	-0.224139	-0.321393	-0.223388	-0.464872	-0.522327	-0.837193	-0.719915
B2GUZ3	Methylenetetrahydrofolate dehydrogenase (NADP+-dependent) 1-like OS=Rattus norvegicus OX=10116 GN=Mthfd1l PE=1 SV=1 - [B2GUZ3_RAT]	16	35	0.212882	0.583466	0.322046	0.186721	0.305759	0.282565	0.378198	0.359771
D3ZI66	Ring finger protein 149 OS=Rattus norvegicus OX=10116 GN=Rnf149 PE=1 SV=1 - [D3ZI66_RAT]	3	4	1.22185	0.816643	1.40207	0.668437	0.552584	0.619348	0.859018	0.805339
P52925	High mobility group protein B2 OS=Rattus norvegicus OX=10116 GN=Hmgb2 PE=2 SV=2 - [HMGB2_RAT]	2	103	-0.780771	-0.62746	-0.122032	0.174984	-0.298925	-0.409745	-0.246864	-0.166535
D4A8D5	Filamin B OS=Rattus norvegicus OX=10116 GN=Flnb PE=1 SV=1 - [D4A8D5_RAT]	86	436	-0.0153852	-0.0302329	0.0960377	0.11823	0.161055	0.209917	0.205203	0.213793
D3ZTW8	Mitochondrial ribosomal protein L27 OS=Rattus norvegicus OX=10116 GN=Mrpl27 PE=1 SV=2 - [D3ZTW8_RAT]	2	6	-0.0215851	-0.0148746	-0.350209	-0.0348401	-0.0815763	-0.268273	-0.400246	-0.591262
G3V7Q7	IQ motif containing GTPase activating protein 1 (Predicted), isoform CRA_b OS=Rattus norvegicus OX=10116 GN=Iqgap1 PE=1 SV=1 - [G3V7Q7_RAT]	16	83	0.16977	-0.0982992	-0.0691558	-0.0961606	0.0646351	0.32486	0.352376	0.376669
Q5M949	Nipsnap homolog 3A (C. elegans) OS=Rattus norvegicus OX=10116 GN=Nipsnap3b PE=1 SV=1 - [Q5M949_RAT]	5	17	-0.683268	-0.870362	-0.904395	-0.644142	-0.89801	-0.906475	-0.844761	-0.965437
Q6AYS7	Aminoacylase-1A OS=Rattus norvegicus OX=10116 GN=Acy1a PE=1 SV=1 - [ACY1A_RAT]	14	41	0.50895	-0.149185	-0.480418	-0.231778	-0.339079	-0.387247	-0.400132	-0.467781
A0A0G2K8F7	Ubiquitin-conjugating enzyme E2A OS=Rattus norvegicus OX=10116 GN=Ube2a PE=1 SV=1 - [A0A0G2K8F7_RAT]	1	3	0.485603	0.0659483	0.0905649	0.172252	0.21223	0.263671	0.235099	0.227202
Q7TM96	Zinc finger protein 622 OS=Rattus norvegicus OX=10116 GN=Znf622 PE=1 SV=2 - [ZN622_RAT]	2	3	-0.369334	-0.302512	0.159309	0.149353	-0.181949	-0.793015	-1.10961	-0.512121
M0RCI5	Phospholipase A2, group XIIB OS=Rattus norvegicus OX=10116 GN=Pla2g12b PE=1 SV=1 - [M0RCI5_RAT]	3	12	1.21303	1.05136	0.881035	1.34955	0.895789	0.459809	0.404414	0.50259
D4A8N2	Ferredoxin 1-like OS=Rattus norvegicus OX=10116 GN=Fdx2 PE=1 SV=1 - [D4A8N2_RAT]	4	9	0.523025	0.278709	-0.0794685	0.172875	-0.337601	-0.874788	-0.607097	-0.408931
A0A0H2UHU0	40S ribosomal protein S25 OS=Rattus norvegicus OX=10116 GN=Rps25 PE=4 SV=1 - [A0A0H2UHU0_RAT]	3	15	-0.512892	0.0302919	-0.344568	-0.485835	-0.357078	-0.582124	-0.777697	-0.576845
D3ZXF9	Mitochondrial ribosomal protein L12 OS=Rattus norvegicus OX=10116 GN=Mrpl12 PE=1 SV=1 - [D3ZXF9_RAT]	7	55	0.259374	0.249447	-0.239036	0.121108	-0.324961	-0.613613	-0.601193	-0.714191
B2RYU6	Trafficking protein particle complex subunit 2-like protein OS=Rattus norvegicus OX=10116 GN=Trappc2l PE=2 SV=1 - [TPC2L_RAT]	3	4	0.106029	0.0276098	-0.111703	-0.306151	0.0684456	0.252242	0.311296	0.344396
D3ZJZ0	RGD1563250 (Predicted), isoform CRA_a OS=Rattus norvegicus OX=10116 GN=Tmem205 PE=1 SV=1 - [D3ZJZ0_RAT]	2	11	-0.852959	0.0316476	-0.254983	-0.801019	-0.681826	-0.590499	-0.501225	-0.539037
D3ZL11	Rabenosyn, RAB effector OS=Rattus norvegicus OX=10116 GN=Rbsn PE=1 SV=1 - [D3ZL11_RAT]	1	2	0.0578064	-0.0768761	-0.0611246	-0.121615	-0.644067	-0.467486	-0.377721	-0.42502
B2BL03	Transmembrane protein 88 (Fragment) OS=Rattus norvegicus OX=10116 GN=Tmem88 PE=2 SV=1 - [B2BL03_RAT]	1	2	0.424657	0.782878	0.767083	0.352942	0.441496	0.556946	0.344357	0.452093
D4A9J4	Nuclear receptor-binding SET domain protein 2 OS=Rattus norvegicus OX=10116 GN=Nsd2 PE=1 SV=2 - [D4A9J4_RAT]	3	6	-0.659759	-0.639457	-0.46362	-0.0626606	-0.0247498	-0.235513	-0.254937	-0.272859
F1M8A5	Huntingtin-interacting protein K OS=Rattus norvegicus OX=10116 GN=Hypk PE=1 SV=1 - [F1M8A5_RAT]	3	14	-0.111829	-0.309395	-0.451932	-0.233609	-0.35224	-0.63661	-0.653438	-0.62065
B1WBZ7	GPN-loop GTPase 1 OS=Rattus norvegicus OX=10116 GN=Gpn1 PE=1 SV=1 - [B1WBZ7_RAT]	1	1	-0.182822	-1.03679	-0.855288	-0.970438	-0.654937	-0.694288	-0.528822	-0.2879
Q4FZT2	Protein phosphatase methylesterase 1 OS=Rattus norvegicus OX=10116 GN=Ppme1 PE=1 SV=2 - [PPME1_RAT]	2	4	0.0621961	-0.003001	-0.262713	-0.314432	-0.25353	-0.210619	-0.151669	-0.139805
D4A833	Mitochondrial ribosomal protein S30 OS=Rattus norvegicus OX=10116 GN=Mrps30 PE=1 SV=1 - [D4A833_RAT]	2	9	0.0465271	0.565187	-0.236557	-0.513895	-0.391899	-0.390673	-0.259802	-0.307603
P12001	60S ribosomal protein L18 OS=Rattus norvegicus OX=10116 GN=Rpl18 PE=1 SV=2 - [RL18_RAT]	7	24	-1.34658	0.0342878	-0.711991	-0.804339	-0.767943	-0.805411	-0.726807	-0.903437
P0C6B8	Sushi, von Willebrand factor type A, EGF and pentraxin domain-containing protein 1 OS=Rattus norvegicus OX=10116 GN=Svep1 PE=1 SV=1 - [SVEP1_RAT]	7	14	0.0220829	0.121737	0.349127	0.650561	0.37948	0.390602	0.30844	0.388216
Q5U2U2	Crk-like protein OS=Rattus norvegicus OX=10116 GN=Crkl PE=1 SV=1 - [CRKL_RAT]	6	12	0.345455	0.142636	-0.178727	0.0380011	-0.220953	-0.292763	-0.208752	-0.395555
F1LPG5	NADH:ubiquinone oxidoreductase subunit B4 OS=Rattus norvegicus OX=10116 GN=Ndufb4 PE=1 SV=1 - [F1LPG5_RAT]	4	24	-0.347537	0.0885253	-0.191681	-0.511156	-0.483803	-0.183595	-0.296162	-0.54222
Q3SYQ0	Bmp2k protein (Fragment) OS=Rattus norvegicus OX=10116 GN=Bmp2k PE=2 SV=1 - [Q3SYQ0_RAT]	1	6	-0.0371355	0.441635	0.204675	0.113787	0.33039	0.218705	0.117486	0.115522
Q5I0D5	Phospholysine phosphohistidine inorganic pyrophosphate phosphatase OS=Rattus norvegicus OX=10116 GN=Lhpp PE=2 SV=1 - [LHPP_RAT]	2	2	0.387655	-0.0151013	0.107877	-0.0968989	-0.192895	-0.140029	-0.147078	-0.179868
D4A702	Synaptopodin-2 OS=Rattus norvegicus OX=10116 GN=Synpo2 PE=1 SV=2 - [SYNP2_RAT]	18	48	-1.95931	-0.0823744	-0.731702	-1.09396	-0.89708	-0.892455	-0.90537	-0.858449
D4A3D2	RCG56113, isoform CRA_a OS=Rattus norvegicus OX=10116 GN=Smyd1 PE=4 SV=1 - [D4A3D2_RAT]	2	7	-2.40496	-3.28532	-0.20838	-3.52657	-2.87003	-2.03173	-2.10922	-1.9007
G3V617	Mitogen-activated protein kinase OS=Rattus norvegicus OX=10116 GN=Mapk14 PE=1 SV=1 - [G3V617_RAT]	2	7	0.32148	0.152801	-0.0600252	-0.183529	0.197587	0.409217	0.446834	0.352907
D4ACM1	Elongator complex protein 3 OS=Rattus norvegicus OX=10116 GN=Elp3 PE=1 SV=2 - [D4ACM1_RAT]	1	1	-0.157216	-0.234951	-0.244426	0.168251	-0.0730685	-0.33152	-0.322119	-0.175535
O35826	Bifunctional UDP-N-acetylglucosamine 2-epimerase/N-acetylmannosamine kinase OS=Rattus norvegicus OX=10116 GN=Gne PE=1 SV=1 - [GLCNE_RAT]	4	4	-0.680795	-0.419375	-0.800143	-1.34662	-1.07954	-0.587532	-0.814502	-0.726434
E9PU28	Inosine-5'-monophosphate dehydrogenase 2 OS=Rattus norvegicus OX=10116 GN=Impdh2 PE=1 SV=1 - [IMDH2_RAT]	12	43	0.310268	-0.18718	-0.0620277	0.0573341	0.0204593	0.186599	0.104814	0.0971022
D4A197	Methylmalonyl CoA epimerase OS=Rattus norvegicus OX=10116 GN=Mcee PE=1 SV=1 - [D4A197_RAT]	4	9	-0.256687	-0.526705	-0.496176	-0.345539	-0.446553	-0.849817	-0.55215	-0.407555
Q27W01	RNA-binding protein 8A OS=Rattus norvegicus OX=10116 GN=Rbm8a PE=1 SV=1 - [RBM8A_RAT]	5	26	-0.55592	-0.477074	-0.171311	-0.0348773	-0.248161	-0.429659	-0.408045	-0.332941
D3ZKG5	Parvin, beta OS=Rattus norvegicus OX=10116 GN=Parvb PE=1 SV=1 - [D3ZKG5_RAT]	3	5	0.723812	0.861365	0.598249	0.0424354	0.450692	0.919844	0.556837	0.685386
D4ABI7	Very-long-chain (3R)-3-hydroxyacyl-CoA dehydratase OS=Rattus norvegicus OX=10116 GN=Hacd3 PE=1 SV=2 - [D4ABI7_RAT]	4	8	-0.739542	0.093078	-0.179104	-0.652591	-0.602659	-0.435117	-0.343177	-0.462185
F1M8U7	Alkaline phosphatase OS=Rattus norvegicus OX=10116 GN=Alppl2 PE=3 SV=3 - [F1M8U7_RAT]	1	3	-2.54929	-3.42579	0.0418487			-2.16593	-2.04599	-2.38612
G3V845	Phosphoinositide phospholipase C OS=Rattus norvegicus OX=10116 GN=Plcg1 PE=1 SV=1 - [G3V845_RAT]	3	3	-0.502704	0.0135869	-0.436034	-0.868947	-0.428933	-0.225202	-0.205938	-0.353685
Q4QRB2	Pre-mRNA-splicing factor SYF2 OS=Rattus norvegicus OX=10116 GN=Syf2 PE=2 SV=1 - [SYF2_RAT]	2	2	-0.631798	-0.840491	-0.969966	-0.305741	-0.29858	-0.60325	-0.69724	-0.535282
F1LRC2	Allograft inflammatory factor 1 OS=Rattus norvegicus OX=10116 GN=Aif1 PE=1 SV=2 - [F1LRC2_RAT]	5	27	0.180033	0.000738874	0.26178	0.254183	-0.347759	-0.588499	-0.613034	-0.429774
A0A0G2JU29	Arachidonate 5-lipoxygenase OS=Rattus norvegicus OX=10116 GN=Alox5 PE=3 SV=1 - [A0A0G2JU29_RAT]	4	5	-0.457533	-0.399682	0.260013	-0.686634	0.322723	0.945428	0.622786	0.748459
F2Z3T0	Parafibromin OS=Rattus norvegicus OX=10116 GN=Cdc73 PE=1 SV=1 - [F2Z3T0_RAT]	9	23	0.212228	0.0782829	0.0219977	0.261078	0.376039	0.290985	0.294909	0.284436
Q566D8	DNA ligase OS=Rattus norvegicus OX=10116 GN=Lig1 PE=1 SV=1 - [Q566D8_RAT]	2	5	-0.32366	-0.388278	-0.716731	0.00955402	-0.110622	-0.431665	-0.547829	-0.35401
P62775	Myotrophin OS=Rattus norvegicus OX=10116 GN=Mtpn PE=1 SV=2 - [MTPN_RAT]	4	21	0.388333	0.0315249	-0.250031	0.0385736	-0.232105	-0.307477	-0.349923	-0.372895
A0A0G2JUY4	Uncharacterized protein OS=Rattus norvegicus OX=10116 PE=1 SV=1 - [A0A0G2JUY4_RAT]	3	14	0.0135117	-0.034755	-0.276771	-0.114597	-0.520305	-0.882414	-0.894494	-0.754206
Q2TA68	Dynamin-like 120 kDa protein, mitochondrial OS=Rattus norvegicus OX=10116 GN=Opa1 PE=1 SV=1 - [OPA1_RAT]	20	39	0.141609	0.306562	0.299654	0.00388806	0.180476	0.307084	0.262847	0.251734
M0R6E6	Uncharacterized protein OS=Rattus norvegicus OX=10116 PE=1 SV=2 - [M0R6E6_RAT]	9	30	-0.47824	-0.530479	-0.354889	-0.152848	-0.287347	-0.539292	-0.519209	-0.361861
F1M7G5	Sulfotransferase OS=Rattus norvegicus OX=10116 GN=Sult2a6 PE=1 SV=3 - [F1M7G5_RAT]	2	2	-1.49774	-1.70102	-1.45523	-2.04159	-0.851329	-0.540836	-0.573444	-0.382745
Q5U302	Catenin (Cadherin associated protein), alpha 1 OS=Rattus norvegicus OX=10116 GN=Ctnna1 PE=1 SV=1 - [Q5U302_RAT]	6	248	-0.0994056	-0.0118814	0.491214	0.570709	0.203356	0.435199	0.100845	0.390634
D3ZT52	Polybromo 1 OS=Rattus norvegicus OX=10116 GN=Pbrm1 PE=1 SV=2 - [D3ZT52_RAT]	22	37	-0.114473	-0.20436	0.169558	0.123887	0.179091	0.228909	0.299887	0.338566
A0A0G2K4G2	Kinesin-like protein OS=Rattus norvegicus OX=10116 GN=Kif2c PE=3 SV=1 - [A0A0G2K4G2_RAT]	1	1	0.369387	0.0132218	-0.0347726	0.622641	0.480341	0.185098	0.392882	0.599394
A0A0G2K7X3	Nuclear ubiquitous casein and cyclin-dependent kinase substrate 1 OS=Rattus norvegicus OX=10116 GN=Nucks1 PE=1 SV=1 - [A0A0G2K7X3_RAT]	6	11	-0.210421	-0.246393	-0.111949	0.169054	-0.177005	-0.946585	-0.984101	-1.00536
M0R469	RCG24243 OS=Rattus norvegicus OX=10116 GN=RGD1566359 PE=4 SV=1 - [M0R469_RAT]	3	6	-0.28209	-0.311337	-0.0436092	0.202858	-0.205388	-0.548865	-0.52175	-0.221915
A0A0G2K109	Transducin-like enhancer of split 2 OS=Rattus norvegicus OX=10116 GN=Tle2 PE=4 SV=1 - [A0A0G2K109_RAT]	1	2	0.228644	-0.0858193	-0.148449	0.0918277	0.0935307	0.103379	0.118554	0.155712
Q6TA25	FGFR1 oncogene partner 2 homolog OS=Rattus norvegicus OX=10116 GN=Fgfr1op2 PE=2 SV=2 - [FGOP2_RAT]	6	13	0.380582	0.270443	0.389933	0.641006	0.263892	0.257766	0.347881	0.35455
D3Z8B0	COX16, cytochrome c oxidase assembly homolog OS=Rattus norvegicus OX=10116 GN=Cox16 PE=1 SV=1 - [D3Z8B0_RAT]	4	9	-0.0162881	0.181213	-0.0360281	-0.0118054	-0.236957	-0.515538	-0.379397	-0.488229
P20651	Serine/threonine-protein phosphatase 2B catalytic subunit beta isoform OS=Rattus norvegicus OX=10116 GN=Ppp3cb PE=1 SV=1 - [PP2BB_RAT]	2	12	-0.133975	-0.998477	-0.93394	-1.02174	-0.261041	-0.409661	-0.363297	-0.294883
F1M853	Ribosome-binding protein 1 OS=Rattus norvegicus OX=10116 GN=Rrbp1 PE=1 SV=3 - [F1M853_RAT]	87	720	0.296882	0.0825177	-0.426461	0.102484	-0.330387	-0.643132	-0.683694	-0.683922
D3ZYL4	Mitochondrial ribosomal protein L50 OS=Rattus norvegicus OX=10116 GN=Mrpl50 PE=1 SV=1 - [D3ZYL4_RAT]	6	14	0.163289	0.0796075	0.0298336	0.0508056	-0.138986	-0.211223	-0.325659	-0.277618
Q75N33	Protein transport protein Sec16B OS=Rattus norvegicus OX=10116 GN=Sec16b PE=1 SV=1 - [SC16B_RAT]	6	15	-0.408034	-0.354882	-0.361205	-0.167706	-0.222493	-0.222628	-0.116176	-0.10465
A7U7N4	Prion-like protein OS=Rattus norvegicus OX=10116 GN=Prnd PE=3 SV=1 - [A7U7N4_RAT]	1	1	-0.877463	-0.134798	-0.666904		-0.385947	-1.35078	-1.64073	-0.904055
F1LQP9	Transportin 1 OS=Rattus norvegicus OX=10116 GN=Tnpo1 PE=1 SV=3 - [F1LQP9_RAT]	7	24	0.0612349	0.312486	0.207544	-0.0542438	0.307663	0.433894	0.649704	0.462663
A0A0G2KB82	CCR4-NOT transcription complex, subunit 2 OS=Rattus norvegicus OX=10116 GN=Cnot2 PE=1 SV=1 - [A0A0G2KB82_RAT]	2	4	0.978315	0.638855	0.459775	1.03278	0.892312	0.476898	0.418606	0.610037
B0BMY2	LOC684097 protein OS=Rattus norvegicus OX=10116 GN=LOC684097 PE=2 SV=1 - [B0BMY2_RAT]	3	11	0.444487	0.12743	0.0834863	0.231555	0.174512	0.184212	0.136935	0.155481
G3V7I8	RCG57812, isoform CRA_b OS=Rattus norvegicus OX=10116 GN=Slk PE=1 SV=1 - [G3V7I8_RAT]	18	44	-0.00250884	-0.105644	-0.2151	-0.155445	-0.141693	-0.278457	-0.382425	-0.365031
Q6P502	T-complex protein 1 subunit gamma OS=Rattus norvegicus OX=10116 GN=Cct3 PE=1 SV=1 - [TCPG_RAT]	28	162	-0.300203	-0.0799465	0.136672	-0.204701	0.388757	0.72201	0.712268	0.657057
Q5YB86	E3 ubiquitin-protein ligase OS=Rattus norvegicus OX=10116 GN=Itch PE=2 SV=1 - [Q5YB86_RAT]	2	13	-0.349632	-0.409657	-0.0613757	-0.980109	-1.07008	-0.580196	-0.633897	-0.377703
Q2VC85	Glutamate cysteine ligase modifier subunit (Fragment) OS=Rattus norvegicus OX=10116 GN=Gcln PE=2 SV=1 - [Q2VC85_RAT]	2	6	0.716476	0.480221	0.189553	0.388964	0.397197	0.40646	0.370369	0.218463
Q6AYD9	Nucleoside diphosphate-linked moiety X motif 19 OS=Rattus norvegicus OX=10116 GN=Nudt19 PE=2 SV=1 - [NUD19_RAT]	4	8	-0.716444	-0.121049	-0.605707	-0.627996	-0.451771	-0.382301	-0.595304	-0.59082
A0A0G2K6D5	Pitrilysin metallopeptidase 1 OS=Rattus norvegicus OX=10116 GN=Pitrm1 PE=1 SV=1 - [A0A0G2K6D5_RAT]	27	82	0.485814	0.382243	0.688116	0.478787	0.243714	0.141734	0.205763	0.220894
Q5BJP3	Ubiquitin-fold modifier 1 OS=Rattus norvegicus OX=10116 GN=Ufm1 PE=3 SV=1 - [UFM1_RAT]	3	4	0.407102	0.0469108	-0.649787	-0.117288	-0.356472	-0.508747	-0.568409	-0.685437
G3V7B7	DNA-directed RNA polymerase subunit OS=Rattus norvegicus OX=10116 GN=Polr1a PE=1 SV=1 - [G3V7B7_RAT]	1	1	0.322399	-0.759628	-0.330338	0.111929	-0.336043	-0.205034	-0.768717	-0.259895
A0A0G2K0P8	CDW92 antigen, isoform CRA_b OS=Rattus norvegicus OX=10116 GN=Slc44a1 PE=1 SV=1 - [A0A0G2K0P8_RAT]	5	11	-0.185364	0.159114	0.235111	0.0117972	0.319398	0.6275	0.62094	0.627284
P39951	Cyclin-dependent kinase 1 OS=Rattus norvegicus OX=10116 GN=Cdk1 PE=1 SV=1 - [CDK1_RAT]	3	7	-0.0204211	-0.246483	-0.165796	0.0141827	0.248958	0.191561	0.488086	0.180846
Q505I4	UPF0235 protein C15orf40 homolog OS=Rattus norvegicus OX=10116 PE=2 SV=1 - [CO040_RAT]	3	5	0.0418599	0.153922	-0.132572	0.105448	-0.152994	-0.412163	-0.507064	-0.361845
G3V796	Acetyl-Coenzyme A dehydrogenase, medium chain OS=Rattus norvegicus OX=10116 GN=Acadm PE=1 SV=1 - [G3V796_RAT]	12	38	-0.206226	-0.090794	0.0231832	-0.435681	-0.377727	-0.230195	-0.261768	-0.199558
D3ZLH8	Rtf1, Paf1/RNA polymerase II complex component, homolog (S. cerevisiae) OS=Rattus norvegicus OX=10116 GN=Rtf1 PE=1 SV=1 - [D3ZLH8_RAT]	9	14	0.120189	-0.171584	-0.583003	-0.116903	-0.162885	-0.301693	-0.403777	-0.475607
D3ZUX7	Acyl-CoA synthetase family member 3 OS=Rattus norvegicus OX=10116 GN=Acsf3 PE=1 SV=1 - [D3ZUX7_RAT]	5	9	0.277867	0.122014	0.301219	-0.157474	-0.290559	-0.0954336	-0.102843	-0.146104
Q6P9U3	COMM domain-containing protein 3 OS=Rattus norvegicus OX=10116 GN=Commd3 PE=1 SV=1 - [COMD3_RAT]	2	3	0.509647	0.371999	0.192794	0.229192	0.307574	0.315761	0.248533	0.115413
P25113	Phosphoglycerate mutase 1 OS=Rattus norvegicus OX=10116 GN=Pgam1 PE=1 SV=4 - [PGAM1_RAT]	11	118	1.06087	0.256459	0.630312	0.351282	0.150621	0.197738	0.190661	0.25364
P26435	Sodium/bile acid cotransporter OS=Rattus norvegicus OX=10116 GN=Slc10a1 PE=1 SV=1 - [NTCP_RAT]	1	2	-0.00456791	-0.14884	0.143903	-0.213536	0.257337	0.593125	0.573989	0.578753
O88759	Potassium voltage-gated channel subfamily S member 3 OS=Rattus norvegicus OX=10116 GN=Kcns3 PE=1 SV=1 - [KCNS3_RAT]	1	1	-1.34431		0.755895		-1.91272	-1.5059	-1.64883	-1.14503
E9PU10	Interferon gamma-inducible protein 47 OS=Rattus norvegicus OX=10116 GN=Ifi47 PE=1 SV=3 - [E9PU10_RAT]	5	9	-0.885877	-0.982977	-0.756344	-1.26329	-0.91827	-0.481432	-0.456002	-0.626435
Q4KLG2	GTPase IMAP family member 8 OS=Rattus norvegicus OX=10116 GN=Gimap8 PE=2 SV=1 - [GIMA8_RAT]	1	2	0.521951	0.210396	-0.0364795	0.0967227	0.617673	0.614982	0.715096	0.287057
D4AB23	Nucleolar complex protein 3 homolog OS=Rattus norvegicus OX=10116 GN=Noc3l PE=1 SV=1 - [D4AB23_RAT]	2	5	-0.311034	-0.459668	0.0803402	-0.00315324	0.0621595	0.409978	0.39621	0.456735
P16970	ATP-binding cassette sub-family D member 3 OS=Rattus norvegicus OX=10116 GN=Abcd3 PE=1 SV=3 - [ABCD3_RAT]	15	32	-1.29367	-0.304328	-0.388187	-1.07085	-0.901374	-0.708323	-0.683974	-0.698558
Q63750	39S ribosomal protein L23, mitochondrial OS=Rattus norvegicus OX=10116 GN=Mrpl23 PE=2 SV=1 - [RM23_RAT]	2	3	-1.08467	-0.00271612	-0.361587	-0.569953	-0.211568	-0.374358	-0.671499	-1.10982
G3V6S2	Cytoplasmic aconitate hydratase OS=Rattus norvegicus OX=10116 GN=Aco1 PE=1 SV=1 - [G3V6S2_RAT]	14	34	-0.0671704	-0.197976	-0.0942738	-0.49069	-0.380462	-0.230508	-0.235274	-0.273591
G3V8V1	Granulin, isoform CRA_c OS=Rattus norvegicus OX=10116 GN=Grn PE=4 SV=1 - [G3V8V1_RAT]	9	19	-0.0105823	-0.108306	0.078741	0.209378	-0.353786	-0.566887	-0.471281	-0.48403
Q5EB90	Polymerase (RNA) II (DNA directed) polypeptide C, 33kDa OS=Rattus norvegicus OX=10116 GN=Polr2c PE=1 SV=1 - [Q5EB90_RAT]	3	12	-0.181944	-0.241184	0.162813	0.248078	0.169865	0.178113	0.117109	0.089879
B0K024	Aamp protein (Fragment) OS=Rattus norvegicus OX=10116 GN=Aamp PE=2 SV=1 - [B0K024_RAT]	3	10	0.31018	-0.179975	-0.335717	0.152091	-0.536822	-0.722384	-0.697189	-0.825878
Q99PV2	Syntaxin binding protein 3, isoform CRA_a OS=Rattus norvegicus OX=10116 GN=Stxbp3 PE=1 SV=1 - [Q99PV2_RAT]	8	12	-0.195654	0.0917321	0.342248	0.198503	0.387578	0.293113	0.281973	0.266541
F1LXB6	Glutamate receptor ionotropic, delta-2 OS=Rattus norvegicus OX=10116 GN=Grid2 PE=1 SV=2 - [F1LXB6_RAT]	1	1	-0.264062	-0.507568	-0.749199	-0.994951	-0.516603	-0.199126	-0.643736	-0.729168
Q6PDU2	Mitochondrial ribosomal protein S18A OS=Rattus norvegicus OX=10116 GN=Mrps18a PE=1 SV=1 - [Q6PDU2_RAT]	1	1	-0.688185	0.209587	-0.00284277	-0.276464	-0.455738	-0.538258	-0.444459	-0.377594
G3V7B6	Phosphatidylglycerophosphatase and protein-tyrosine phosphatase 1 OS=Rattus norvegicus OX=10116 GN=Ptpmt1 PE=1 SV=1 - [G3V7B6_RAT]	2	3	0.254724	0.210551	0.132651	-0.0757676	0.23346	0.393292	0.519574	0.525529
Q6YDN8	BWK-1 OS=Rattus norvegicus OX=10116 GN=Gid8 PE=1 SV=1 - [Q6YDN8_RAT]	5	13	0.0259294	-0.14336	-0.325776	-0.221092	-0.226636	-0.432579	-0.313828	-0.239706
F1LSU8	SNRPN upstream reading frame protein-like OS=Rattus norvegicus OX=10116 GN=LOC100362965 PE=4 SV=1 - [F1LSU8_RAT]	1	1	0.791806	0.336104	0.374449	0.646174	0.78948	0.351195	0.311298	0.562445
B5DFI1	Cog1 protein (Fragment) OS=Rattus norvegicus OX=10116 GN=Cog1 PE=2 SV=1 - [B5DFI1_RAT]	3	6	-0.640526	-0.356694	-0.426682	-0.699391	-0.509693	-0.194944	-0.31766	-0.447982
Q66HD3	Nuclear autoantigenic sperm protein OS=Rattus norvegicus OX=10116 GN=Nasp PE=1 SV=1 - [NASP_RAT]	11	42	0.140967	-0.0777274	-0.646592	0.0208078	-0.339318	-0.476497	-0.513515	-0.586938
Q5RK28	Normal mucosa of esophagus-specific gene 1 protein OS=Rattus norvegicus OX=10116 GN=Nmes1 PE=3 SV=1 - [NMES1_RAT]	2	4	0.763981	-0.367209	-0.376424	-0.351251	0.175439	0.737262	0.597253	0.526404
P61983	14-3-3 protein gamma OS=Rattus norvegicus OX=10116 GN=Ywhag PE=1 SV=2 - [1433G_RAT]	5	118	0.487854	0.071278	0.150937	0.11356	-0.116673	-0.288031	-0.361158	-0.360487
D3ZF49	Transmembrane serine protease 6 OS=Rattus norvegicus OX=10116 GN=Tmprss6 PE=1 SV=1 - [D3ZF49_RAT]	2	2	1.06091	0.503669	0.683352	0.601784	0.513739	0.844627	0.631095	0.768154
G3V6N8	Guanine nucleotide binding protein, alpha 15 OS=Rattus norvegicus OX=10116 GN=Gna15 PE=4 SV=1 - [G3V6N8_RAT]	1	1	1.12664	0.31976	1.31489	1.43198	1.03959	0.98806	0.869432	0.882884
P80349	Fuctinin-3 (Fragment) OS=Rattus norvegicus OX=10116 PE=1 SV=1 - [FUC3_RAT]	1	20	-1.26676	-1.38618	-0.979212	-0.491615	-0.499384	-0.656515	-0.654815	-0.764008
Q5I0E1	Leucine-rich alpha-2-glycoprotein 1 OS=Rattus norvegicus OX=10116 GN=Lrg1 PE=2 SV=1 - [Q5I0E1_RAT]	5	10	0.712393	-0.423479	0.450927	0.169252	0.510978	0.957928	0.873818	0.629817
P70570	Laminin-5 alpha 3 chain OS=Rattus norvegicus OX=10116 PE=2 SV=1 - [P70570_RAT]	5	7	-0.333852	-0.198793	0.0743377	-0.568134	0.204176	0.163954	0.155858	0.343353
Q8K3U6	Coagulation factor VII OS=Rattus norvegicus OX=10116 GN=F7 PE=2 SV=1 - [FA7_RAT]	1	1	0.205884	-0.690682	-0.0332563		-0.719924	-0.321823	-0.383568	-0.33395
D3ZPN5	Mitochondrial poly(A) polymerase OS=Rattus norvegicus OX=10116 GN=Mtpap PE=1 SV=2 - [D3ZPN5_RAT]	1	1	-1.55272	-0.927644	-0.229377		-0.0545258	-0.587855	-0.971215	-1.14791
P23606	Protein-glutamine gamma-glutamyltransferase K OS=Rattus norvegicus OX=10116 GN=Tgm1 PE=1 SV=1 - [TGM1_RAT]	2	4	0.0730815	0.55578	0.665282	-0.431538	-0.584053	-0.0998627	-0.360437	-0.434441
Q8R4A2	Caveolin 1 (Fragment) OS=Rattus norvegicus OX=10116 PE=4 SV=1 - [Q8R4A2_RAT]	3	44	-0.142414	0.190359	0.295933	0.0937847	0.120972	0.110345	0.080913	0.102453
A0JPN6	Mediator of RNA polymerase II transcription subunit 22 OS=Rattus norvegicus OX=10116 GN=Med22 PE=2 SV=1 - [MED22_RAT]	1	2	-0.0150942	-0.256035	-0.443094	0.0875141	0.398273	0.432865	0.423935	0.333314
D3ZT90	Glutaryl-CoA dehydrogenase OS=Rattus norvegicus OX=10116 GN=Gcdh PE=1 SV=1 - [D3ZT90_RAT]	8	24	-0.32178	-0.00577785	-0.19917	-0.461425	-0.480578	-0.368287	-0.37037	-0.276226
A0A0G2K451	Arf-GAP with SH3 domain, ANK repeat and PH domain-containing protein 1 OS=Rattus norvegicus OX=10116 GN=Asap1 PE=1 SV=1 - [A0A0G2K451_RAT]	3	5	-0.497848	-0.796476	-0.54304	-0.425095	-0.366887	-0.204213	-0.141141	-0.20652
O54980	Synaptogyrin-2 OS=Rattus norvegicus OX=10116 GN=Syngr2 PE=1 SV=2 - [SNG2_RAT]	1	2	0.552583	0.466522	0.22239	0.114131	0.455885	0.520439	0.500912	0.409958
Q5XI77	Annexin OS=Rattus norvegicus OX=10116 GN=Anxa11 PE=1 SV=1 - [Q5XI77_RAT]	12	54	0.360106	0.112526	0.603924	0.0749829	0.0975784	0.493551	0.40543	0.575661
B2RYV5	RGD1562502 protein (Fragment) OS=Rattus norvegicus OX=10116 GN=RGD1562502 PE=2 SV=1 - [B2RYV5_RAT]	3	5	0.0535452	0.165936	-0.468141	0.173149	-0.153755	-0.625361	-0.587188	-0.363353
B4F7F3	ARVCF, delta catenin family member OS=Rattus norvegicus OX=10116 GN=Arvcf PE=1 SV=1 - [B4F7F3_RAT]	15	36	0.146382	0.132736	0.47025	0.185964	0.0441612	0.51534	0.492676	0.341597
P61480	Ribosome biogenesis protein WDR12 OS=Rattus norvegicus OX=10116 GN=Wdr12 PE=2 SV=1 - [WDR12_RAT]	5	8	0.0910129	-0.135879	0.522706	0.435855	0.228901	0.288037	0.353617	0.409112
A0A0G2K226	NudC domain-containing 3 (Fragment) OS=Rattus norvegicus OX=10116 GN=Nudcd3 PE=1 SV=1 - [A0A0G2K226_RAT]	1	4	-0.171268	-0.314653	-0.375573	-0.273609	-0.571392	-0.708102	-0.249463	-0.192927
A0A0G2K0Z7	Glycerol-3-phosphate dehydrogenase, mitochondrial OS=Rattus norvegicus OX=10116 GN=Gpd2 PE=1 SV=1 - [A0A0G2K0Z7_RAT]	11	20	0.478635	0.267216	0.558918	0.246877	0.201779	0.324436	0.340938	0.376678
Q5RJQ7	Succinate dehydrogenase assembly factor 2, mitochondrial OS=Rattus norvegicus OX=10116 GN=Sdhaf2 PE=2 SV=1 - [SDHF2_RAT]	1	3	0.20579	0.211852	-0.139099	0.238129	-0.452442	-0.843732	-0.788849	-0.750061
P83883	60S ribosomal protein L36a OS=Rattus norvegicus OX=10116 GN=Rpl36a PE=1 SV=2 - [RL36A_RAT]	4	10	-0.695933	0.248477	-0.367715	-0.485367	-0.557712	-0.731954	-0.908898	-0.774022
Q8CGV7	Thiamine-triphosphatase OS=Rattus norvegicus OX=10116 GN=Thtpa PE=2 SV=3 - [THTPA_RAT]	3	5	0.25479	0.0917122	-0.18465	0.000592033	-0.165709	-0.145351	-0.216587	-0.161739
D4A853	Capicua transcriptional repressor OS=Rattus norvegicus OX=10116 GN=Cic PE=1 SV=2 - [D4A853_RAT]	5	10	-0.120991	-0.201757	-0.382467	-0.134294	-0.174571	-0.463322	-0.503935	-0.26546
D4AAV4	Rho GTPase-activating protein 17 OS=Rattus norvegicus OX=10116 GN=Arhgap17 PE=1 SV=3 - [D4AAV4_RAT]	4	9	-0.26871	-0.169637	-0.10306	-0.60745	-0.385805	-0.209594	-0.39025	-0.507842
Q9NQR8	NADH dehydrogenase [ubiquinone] 1 alpha subcomplex assembly factor 4 OS=Rattus norvegicus OX=10116 GN=Ndufaf4 PE=1 SV=1 - [NDUF4_RAT]	4	16	0.313809	0.146783	0.162489	-0.0434589	-0.124005	0.00549284	-0.165222	-0.129649
Q07014	Tyrosine-protein kinase Lyn OS=Rattus norvegicus OX=10116 GN=Lyn PE=1 SV=3 - [LYN_RAT]	5	15	0.211416	0.392584	0.402767	-0.0606473	0.370013	0.569358	0.53275	0.497082
Q6QI41	LRRGT00167 OS=Rattus norvegicus OX=10116 GN=LOC498155 PE=2 SV=1 - [Q6QI41_RAT]	1	1	-1.74815	-1.34492	-0.957667	-0.983272	0.0472591	0.735437	0.756072	0.515963
Q68FQ7	RNA polymerase II-associated protein 3 OS=Rattus norvegicus OX=10116 GN=Rpap3 PE=1 SV=1 - [RPAP3_RAT]	7	13	0.438972	-0.0868148	-0.266526	-0.0461483	-0.109546	-0.212804	-0.145607	-0.154917
D4A7N1	MICOS complex subunit Mic25 OS=Rattus norvegicus OX=10116 GN=Chchd6 PE=1 SV=1 - [MIC25_RAT]	5	11	0.195801	0.307107	0.115921	0.0352216	-0.227534	-0.196596	-0.162534	-0.340629
D3ZJC0	BTB (POZ) domain containing 3 (Predicted) OS=Rattus norvegicus OX=10116 GN=Btbd3 PE=4 SV=1 - [D3ZJC0_RAT]	1	1	0.273622	-0.301909	0.667973	0.792555	0.311346	0.41636	0.59682	0.490228
P11598	Protein disulfide-isomerase A3 OS=Rattus norvegicus OX=10116 GN=Pdia3 PE=1 SV=2 - [PDIA3_RAT]	45	801	0.625517	0.561861	0.566273	0.809315	0.472647	0.252099	0.265372	0.279694
M0R5H1	Enhancer trap locus 4 OS=Rattus norvegicus OX=10116 GN=Etl4 PE=1 SV=2 - [M0R5H1_RAT]	29	81	0.0215133	0.0802619	0.272559	0.236729	0.239951	0.352717	0.480838	0.412507
B0BNB1	Commd1 protein OS=Rattus norvegicus OX=10116 GN=Commd1 PE=1 SV=1 - [B0BNB1_RAT]	2	3	0.805476	0.518534	0.427175	0.582266	0.43268	0.460323	0.639171	0.732403
Q5Y4N8	Adhesion G protein-coupled receptor E2 OS=Rattus norvegicus OX=10116 GN=Adgre1 PE=2 SV=1 - [AGRE1_RAT]	3	5	0.839764	0.730729	1.04453	1.13667	0.445778	0.538513	0.711183	0.376067
B0BNJ1	LOC683667 protein OS=Rattus norvegicus OX=10116 GN=Sri PE=1 SV=1 - [B0BNJ1_RAT]	7	35	0.345025	-0.323536	-0.0258446	-0.129888	0.165837	0.416434	0.459423	0.473202
A0A096MJM8	LAS1-like, ribosome biogenesis factor (Fragment) OS=Rattus norvegicus OX=10116 GN=Las1l PE=1 SV=1 - [A0A096MJM8_RAT]	6	11	-0.130469	-0.076851	0.0952571	0.413852	0.466629	0.215645	0.244065	0.359887
G3V784	ADP-dependent glucokinase OS=Rattus norvegicus OX=10116 GN=Adpgk PE=1 SV=1 - [G3V784_RAT]	4	12	0.443761	0.671375	0.930125	0.136105	0.366256	0.65341	0.535822	0.551205
D3ZAH3	Neural precursor cell-expressed, developmentally down-regulated 1 OS=Rattus norvegicus OX=10116 GN=Nedd1 PE=1 SV=1 - [D3ZAH3_RAT]	1	2	0.47714	0.00343158	0.290854	0.579896	0.38972	0.0666162	0.146317	0.364895
D3ZBN0	Histone H1.5 OS=Rattus norvegicus OX=10116 GN=Hist1h1b PE=1 SV=1 - [H15_RAT]	10	190	-0.802109	-0.677163	-0.155204	0.105629	-0.216671	-0.290091	-0.304618	-0.272029
Q5FVR0	T-cell immunoglobulin and mucin domain-containing protein 2 OS=Rattus norvegicus OX=10116 GN=Timd2 PE=2 SV=1 - [TIMD2_RAT]	1	4	0.389431	0.339847	0.136955	0.346929	0.375029	0.400193	0.407637	0.350413
B0BN56	28S ribosomal protein S31, mitochondrial OS=Rattus norvegicus OX=10116 GN=Mrps31 PE=2 SV=1 - [RT31_RAT]	8	14	0.166171	0.245822	-0.0396759	0.159963	-0.0487659	-0.276331	-0.250416	-0.281103
Q6PCU8	NADH dehydrogenase [ubiquinone] flavoprotein 3, mitochondrial OS=Rattus norvegicus OX=10116 GN=Ndufv3 PE=3 SV=1 - [NDUV3_RAT]	3	20	0.0592207	0.282637	-0.105291	0.0986352	-0.198951	-0.51785	-0.849298	-0.958945
Q6IFV4	Keratin, type I cytoskeletal 13 OS=Rattus norvegicus OX=10116 GN=Krt13 PE=3 SV=1 - [K1C13_RAT]	12	119	-2.89197	-2.76559	-2.64693	-2.80792	-2.91564	-2.92127	-2.77554	-2.80463
Q5M8B4	Ficolin (Collagen/fibrinogen domain containing) 1 OS=Rattus norvegicus OX=10116 GN=Fcna PE=1 SV=1 - [Q5M8B4_RAT]	5	14	1.05904	0.544367	1.07175	0.562488	0.360506	0.403371	0.415388	0.257847
A0A0G2JU40	C2 calcium-dependent domain-containing 2 OS=Rattus norvegicus OX=10116 GN=C2cd2 PE=1 SV=1 - [A0A0G2JU40_RAT]	3	4	-0.246337	0.101144	-0.107718	-0.0917321	0.534703	0.580281	0.327291	0.423113
B2GVA4	Mitochondrial tumor suppressor 1 OS=Rattus norvegicus OX=10116 GN=Mtus1 PE=2 SV=1 - [B2GVA4_RAT]	16	49	-0.174317	-0.449283	-0.0265486	0.129973	0.285358	0.300641	0.29646	0.322814
D3ZIE3	DEAD (Asp-Glu-Ala-Asp) box polypeptide 51 (Predicted), isoform CRA_b OS=Rattus norvegicus OX=10116 GN=Ddx51 PE=3 SV=1 - [D3ZIE3_RAT]	3	4	-0.400528	-0.156198	0.127557	-0.0106727	-0.341671	-0.650867	-0.581054	-0.365957
A0JPQ9	Chitinase domain-containing protein 1 OS=Rattus norvegicus OX=10116 GN=Chid1 PE=2 SV=2 - [CHID1_RAT]	2	6	0.489001	0.313784	0.28188	0.124339	0.137024	0.197492	0.37286	0.267532
A0A0G2K868	KRI1 homolog OS=Rattus norvegicus OX=10116 GN=Kri1 PE=4 SV=1 - [A0A0G2K868_RAT]	4	5	-0.141466	0.0680136	0.0641904	0.395781	0.446272	0.227926	0.237052	0.158672
D4A8N7	Rhophilin, Rho GTPase binding protein 2 (Predicted) OS=Rattus norvegicus OX=10116 GN=Rhpn2 PE=4 SV=1 - [D4A8N7_RAT]	1	1	-1.21167	-0.808423	-0.277208	-0.502063	-0.553948	-0.412944	-0.456224	-0.216667
P06765	Platelet factor 4 OS=Rattus norvegicus OX=10116 GN=Pf4 PE=1 SV=1 - [PLF4_RAT]	4	13	0.0531331	-0.152296	-0.0240902	0.0414162	0.349563	0.634631	0.682743	0.584706
M0RDF7	Bystin OS=Rattus norvegicus OX=10116 GN=Bysl PE=1 SV=1 - [M0RDF7_RAT]	4	10	0.0469523	0.00770039	0.310427	0.14647	0.234051	0.162191	0.466184	0.51211
G3V6P8	Guanine nucleotide-binding protein subunit gamma OS=Rattus norvegicus OX=10116 GN=Gng12 PE=1 SV=1 - [G3V6P8_RAT]	4	9	0.188167	0.245454	0.342331	0.350857	0.330449	0.218131	0.159911	0.0852544
D4ADT3	WAPL cohesin release factor OS=Rattus norvegicus OX=10116 GN=Wapl PE=1 SV=2 - [D4ADT3_RAT]	3	6	-0.125248	-0.0880535	-0.333352	0.126608	-0.214783	-0.586539	-0.696802	-0.519455
G3V661	Bromodomain adjacent to zinc finger domain protein 1B OS=Rattus norvegicus OX=10116 GN=Baz1b PE=1 SV=1 - [G3V661_RAT]	20	34	-0.126089	-0.25276	0.260637	0.15207	0.093064	0.225238	0.268133	0.240935
G3V8T1	M-phase phosphoprotein 8 OS=Rattus norvegicus OX=10116 GN=Mphosph8 PE=2 SV=1 - [MPP8_RAT]	3	9	-0.426172	-0.476558	0.0578025	0.300367	-0.098039	-0.292543	-0.423811	-0.371233
D3ZFB2	LUC7-like 3 pre-mRNA-splicing factor OS=Rattus norvegicus OX=10116 GN=Luc7l3 PE=1 SV=1 - [D3ZFB2_RAT]	9	20	-0.252968	-0.0328669	-0.29564	0.287396	0.367155	0.347065	0.374266	0.188028
A5HKJ3	Proteasome maturation protein OS=Rattus norvegicus OX=10116 GN=Pomp PE=1 SV=1 - [A5HKJ3_RAT]	1	1	0.13528	-0.338776	-0.346799	-0.272167	-0.251228	-0.453793	-0.593632	-0.261255
D3ZJR7	Desmocollin 2 OS=Rattus norvegicus OX=10116 GN=Dsc2 PE=1 SV=3 - [D3ZJR7_RAT]	11	22	0.435275	0.358653	0.546084	0.487386	0.239324	0.273217	0.267131	0.288182
A0A0A0MP78	Teashirt homolog 3 OS=Rattus norvegicus OX=10116 GN=Tshz3 PE=4 SV=2 - [A0A0A0MP78_RAT]	1	1			0.0654753			-1.54498	-1.70179	-1.41646
Q6P6U0	Tyrosine-protein kinase Fgr OS=Rattus norvegicus OX=10116 GN=Fgr PE=1 SV=1 - [FGR_RAT]	1	3	0.112077	-0.358918	-0.186482	-0.713914	0.15277	0.86797	0.833625	0.838864
Q4KM74	Vesicle-trafficking protein SEC22b OS=Rattus norvegicus OX=10116 GN=Sec22b PE=1 SV=3 - [SC22B_RAT]	8	34	0.204103	0.448989	0.620431	-0.0207962	0.272124	0.632948	0.679954	0.661896
Q9EPT7	Prothrombinase FGL2 OS=Rattus norvegicus OX=10116 PE=2 SV=1 - [Q9EPT7_RAT]	10	25	-0.165766	-0.470409	-0.014486	-0.070544	0.309338	0.55655	0.511981	0.430431
A0A0G2K2V2	AP complex subunit beta OS=Rattus norvegicus OX=10116 GN=Ap1b1 PE=1 SV=1 - [A0A0G2K2V2_RAT]	9	52	0.340807	0.393104	0.485716	0.187837	0.314496	0.458331	0.227623	0.292679
Q6IRK9	Carboxypeptidase Q OS=Rattus norvegicus OX=10116 GN=Cpq PE=1 SV=1 - [CBPQ_RAT]	7	15	0.153172	-0.404545	0.0840269	-0.254357	0.0637403	0.274248	0.405272	0.498928
D3ZXI0	Pyrroline-5-carboxylate reductase OS=Rattus norvegicus OX=10116 GN=Pycr1 PE=3 SV=2 - [D3ZXI0_RAT]	2	5	-0.184431	-0.152	-0.51947	-0.69594	0.142014	0.271617	0.19088	0.157884
Q6AZ64	X-ray repair complementing defective repair in Chinese hamster cells 6, isoform CRA_a OS=Rattus norvegicus OX=10116 GN=Xrcc6 PE=1 SV=1 - [Q6AZ64_RAT]	11	18	-0.085539	-0.135607	-0.0563316	-0.180304	0.147564	0.388473	0.37009	0.244102
Q5RK03	CDKN2AIP N-terminal-like protein OS=Rattus norvegicus OX=10116 GN=Cdkn2aipnl PE=3 SV=1 - [C2AIL_RAT]	1	3	0.565659	0.293525	0.316017	0.408177	0.513785	0.49005	0.405176	0.425348
D4A1W8	Microsomal triglyceride transfer protein OS=Rattus norvegicus OX=10116 GN=Mttp PE=1 SV=1 - [D4A1W8_RAT]	34	142	0.5178	0.948818	0.775284	0.444597	0.375055	0.393613	0.433227	0.314306
F1M1Y0	SH3-containing GRB2-like protein 3-interacting protein 1 OS=Rattus norvegicus OX=10116 GN=Sgip1 PE=1 SV=3 - [F1M1Y0_RAT]	1	1	0.617711	0.183637	0.694649	0.449292	0.35669	0.531928	0.520256	0.588647
B5DEJ9	LOC691036 protein OS=Rattus norvegicus OX=10116 GN=Sbf2 PE=2 SV=1 - [B5DEJ9_RAT]	2	2	0.698829	0.158858	0.640279	0.504271	0.352493	0.345808	0.43454	0.525442
F1M4U0	Cyclin Y-like 1 OS=Rattus norvegicus OX=10116 GN=Ccnyl1 PE=1 SV=3 - [F1M4U0_RAT]	1	1			1.69419	0.709024		0.950653	0.996034	0.82959
D4A5T8	Periplakin OS=Rattus norvegicus OX=10116 GN=Ppl PE=1 SV=1 - [D4A5T8_RAT]	48	104	-0.833653	-0.535216	-0.599043	-1.04325	-0.903372	-0.698496	-0.738189	-0.705012
D3ZA25	Ankyrin repeat domain 42 OS=Rattus norvegicus OX=10116 GN=Ankrd42 PE=4 SV=1 - [D3ZA25_RAT]	1	1	1.02279	1.27127	1.24007	0.898161	0.603481	0.317111	0.304348	0.243661
Q5U2R7	LRP chaperone MESD OS=Rattus norvegicus OX=10116 GN=Mesd PE=2 SV=1 - [MESD_RAT]	10	36	-0.0204909	0.34682	0.130632	0.301327	-0.442478	-0.68984	-0.877757	-0.884694
D4A3E8	Mitochondrial ribosomal protein S27 OS=Rattus norvegicus OX=10116 GN=Mrps27 PE=1 SV=1 - [D4A3E8_RAT]	9	18	0.554215	0.294675	0.340221	0.293778	0.370415	0.209534	0.313544	0.195869
Q3KR82	Zinc transporter ZIP9 OS=Rattus norvegicus OX=10116 GN=Slc39a9 PE=2 SV=1 - [S39A9_RAT]	1	2	-0.135222	0.377423	0.277481	0.213746	0.347307	0.421835	0.546665	0.287161
Q62952	Dihydropyrimidinase-related protein 3 OS=Rattus norvegicus OX=10116 GN=Dpysl3 PE=1 SV=2 - [DPYL3_RAT]	18	63	-1.00525	-0.973856	-0.893867	-0.808233	-0.421756	-0.308142	-0.383394	-0.330275
A0A0G2K320	Sialic acid-binding Ig-like lectin 1 OS=Rattus norvegicus OX=10116 GN=Siglec1 PE=1 SV=1 - [A0A0G2K320_RAT]	21	48	0.246633	0.0645839	0.969873	0.25452	0.213907	0.538715	0.514309	0.487839
D3ZYT2	Mitochondrial ribosomal protein S5 OS=Rattus norvegicus OX=10116 GN=Mrps5 PE=1 SV=1 - [D3ZYT2_RAT]	3	4	-0.390403	0.39144	-0.0801227	-0.460203	-0.697914	-0.62409	-0.671151	-0.467254
Q7TQN4	RELA OS=Rattus norvegicus OX=10116 GN=Rela PE=1 SV=1 - [Q7TQN4_RAT]	2	4	-0.669369	-1.1409	-0.524628	0.107794	-1.00439	-0.969911	-1.43894	-1.30608
P23897	Heat-stable enterotoxin receptor OS=Rattus norvegicus OX=10116 GN=Gucy2c PE=2 SV=2 - [GUC2C_RAT]	1	1	0.114009	-0.0868105	0.166156	0.00175726	0.460928	0.811494	0.565176	0.591787
F7EZ89	TBC1 domain family, member 15 OS=Rattus norvegicus OX=10116 GN=Tbc1d15 PE=1 SV=2 - [F7EZ89_RAT]	8	13	0.508539	0.530257	0.225021	0.163185	0.261121	0.224485	0.270121	0.30621
P36876	Serine/threonine-protein phosphatase 2A 55 kDa regulatory subunit B alpha isoform OS=Rattus norvegicus OX=10116 GN=Ppp2r2a PE=2 SV=1 - [2ABA_RAT]	3	6	-0.492786	-0.0381879	-0.344926	-0.560195	-0.343565	-0.479788	-0.431289	-0.545808
B2GV51	Nudt13 protein OS=Rattus norvegicus OX=10116 GN=Nudt13 PE=2 SV=1 - [B2GV51_RAT]	2	4	1.06645	0.711392	1.11813	0.212091	0.42123	0.593242	0.618556	0.577142
A0A0G2K6P7	Keratin, type II cytoskeletal 4 OS=Rattus norvegicus OX=10116 GN=Krt4 PE=3 SV=1 - [A0A0G2K6P7_RAT]	12	130	-2.43556	-2.05155	-2.12215	-2.10377	-2.24325	-2.36879	-2.43289	-2.50451
D4A5E5	Sarcoglycan, beta OS=Rattus norvegicus OX=10116 GN=Sgcb PE=4 SV=2 - [D4A5E5_RAT]	2	2	-1.1615		-0.333429			-1.20079	-1.44559	-1.28701
Q6AYD0	Leucine-rich repeat-containing 17 OS=Rattus norvegicus OX=10116 GN=Lrrc17 PE=2 SV=1 - [Q6AYD0_RAT]	3	5	-0.592167	-0.563045	-0.160709	-0.464763	0.229618	0.487061	0.30403	0.523208
B2RZ16	GINS complex subunit 1 OS=Rattus norvegicus OX=10116 GN=Gins1 PE=2 SV=1 - [B2RZ16_RAT]	1	2	0.888498		0.529492		0.406624	0.302507	0.398549	0.249653
E9PTV0	Guanylate kinase 1 OS=Rattus norvegicus OX=10116 GN=Guk1 PE=1 SV=2 - [E9PTV0_RAT]	4	10	0.148286	-0.0124448	-0.154277	0.00134325	-0.160118	-0.380308	-0.488449	-0.398823
G3V8J2	Cytochrome P450 family 8 subfamily B member 1 OS=Rattus norvegicus OX=10116 GN=Cyp8b1 PE=1 SV=1 - [G3V8J2_RAT]	9	22	-0.978277	-0.00982613	-0.302381	-1.26487	-1.09008	-0.895085	-0.779032	-0.801956
Q66HC5	Nuclear pore complex protein Nup93 OS=Rattus norvegicus OX=10116 GN=Nup93 PE=1 SV=1 - [NUP93_RAT]	26	59	-0.382506	0.002663	0.366976	-0.0621206	0.262075	0.520864	0.583969	0.602945
G3V8Q9	Adenomatosis polyposis coli, isoform CRA_a OS=Rattus norvegicus OX=10116 GN=Apc PE=1 SV=1 - [G3V8Q9_RAT]	4	8	0.207983	0.0914731	-0.219513	-0.174502	-0.537888	-0.661857	-0.392214	-0.485899
Q5FVQ4	Malectin OS=Rattus norvegicus OX=10116 GN=Mlec PE=2 SV=1 - [MLEC_RAT]	12	31	0.136724	0.109139	0.494356	-0.00831661	0.0539131	0.318734	0.36925	0.394221
K9N0M9	CDK5 regulatory subunit associated protein 1-like 1 OS=Rattus norvegicus OX=10116 GN=CDKAL1 PE=2 SV=1 - [K9N0M9_RAT]	2	2	-0.921805	-0.377196	-0.545793	-0.61325	-0.35788	-0.678654	-0.502137	-0.646556
D4A612	Elongation of very long chain fatty acids protein 2 OS=Rattus norvegicus OX=10116 GN=Elovl2 PE=1 SV=1 - [ELOV2_RAT]	2	4	-1.68101	-0.384789	0.354129	-1.31226	-1.73895	-1.0031	-0.854488	-1.04786
D3Z9W1	Hypothetical protein LOC100271845 OS=Rattus norvegicus OX=10116 GN=LOC100271845 PE=4 SV=1 - [D3Z9W1_RAT]	1	1	0.383233	0.397198	0.321082	0.495051	0.457263	0.332613	0.274708	0.380386
D4A5A6	DNA-directed RNA polymerase subunit OS=Rattus norvegicus OX=10116 GN=Polr2a PE=1 SV=1 - [D4A5A6_RAT]	19	54	-0.212025	-0.228871	0.0998683	0.0792135	0.21237	0.158323	0.21597	0.125318
Q03344	ATPase inhibitor, mitochondrial OS=Rattus norvegicus OX=10116 GN=Atp5if1 PE=3 SV=2 - [ATIF1_RAT]	4	24	-0.295131	-0.176878	-0.281993	-0.00216576	-0.426784	-0.462317	-0.611264	-0.639516
A0A0G2K7S2	Integrator complex subunit 6 OS=Rattus norvegicus OX=10116 GN=Ints6 PE=1 SV=1 - [A0A0G2K7S2_RAT]	4	7	-0.137279	-0.411697	0.133557	0.281911	0.287621	0.251381	0.176492	0.419139
G3V9X9	Phosphoinositide phospholipase C OS=Rattus norvegicus OX=10116 GN=Plce1 PE=1 SV=1 - [G3V9X9_RAT]	1	1	-2.37584		0.172418	-5.40869	-3.48682	-2.26805	-2.21606	-2.47184
F1M6T7	Glutamate-rich 5 OS=Rattus norvegicus OX=10116 GN=Erich5 PE=1 SV=3 - [F1M6T7_RAT]	11	32	1.01166	0.885656	1.01832	1.44955	0.721865	0.515048	0.468057	0.528391
Q6MG08	ATP-binding cassette sub-family F member 1 OS=Rattus norvegicus OX=10116 GN=Abcf1 PE=1 SV=1 - [ABCF1_RAT]	7	12	-0.0148624	0.19906	-0.170908	-0.210186	-0.260143	-0.290848	-0.274337	-0.250172
Q6TXG9	Swi5-dependent recombination DNA repair protein 1 homolog OS=Rattus norvegicus OX=10116 GN=Sfr1 PE=2 SV=1 - [SFR1_RAT]	2	3	-0.330713	-0.34295	-0.44552	0.0460646	-0.317431	-0.301006	-0.402442	-0.500678
B2RYP4	Sorting nexin 2 OS=Rattus norvegicus OX=10116 GN=Snx2 PE=1 SV=1 - [B2RYP4_RAT]	10	26	0.542654	0.0393861	0.0644975	0.145475	0.126822	0.334677	0.195003	0.241082
Q10739	Matrix metalloproteinase-14 OS=Rattus norvegicus OX=10116 GN=Mmp14 PE=2 SV=2 - [MMP14_RAT]	10	22	-0.0630811	-0.0963953	0.280806	-0.00211856	0.120212	0.387911	0.380926	0.442376
Q920B8	Interleukin-5 receptor alpha OS=Rattus norvegicus OX=10116 PE=2 SV=1 - [Q920B8_RAT]	1	10	-1.42207	-1.27819	-1.12836	-1.37285	-0.699607	-0.547268	-0.593165	-0.688153
A0A0G2K1W9	Lactate dehydrogenase D OS=Rattus norvegicus OX=10116 GN=Ldhd PE=1 SV=1 - [A0A0G2K1W9_RAT]	2	12	0.560795	0.273132	0.357434	0.0408235	-0.322233	-0.207128	-0.436186	-0.189633
B2RZB5	Charged multivesicular body protein 2A OS=Rattus norvegicus OX=10116 GN=Chmp2a PE=1 SV=1 - [B2RZB5_RAT]	5	6	-0.285433	-0.579287	-0.204232	-0.0816489	-0.18709	-0.314822	-0.158914	-0.315184
F1LRJ0	Potassium channel modulatory factor 1 OS=Rattus norvegicus OX=10116 GN=Kcmf1 PE=1 SV=2 - [F1LRJ0_RAT]	2	3	0.0885429	-0.178246	-0.225637	-0.15043	-0.446564	-0.404931	-0.356568	-0.361462
D3ZZY7	KAT8 regulatory NSL complex subunit 1-like OS=Rattus norvegicus OX=10116 GN=Kansl1l PE=4 SV=2 - [D3ZZY7_RAT]	1	1	-0.113763	-0.178406	-0.452417	-0.564856	-0.537556	-0.642029	-0.556223	-0.719314
G3V9Q7	Cathepsin G OS=Rattus norvegicus OX=10116 GN=Ctsg PE=1 SV=1 - [G3V9Q7_RAT]	4	7	-0.158545	0.154846	0.127966	-0.129437	0.14473	0.599789	0.538725	0.590039
P07340	Sodium/potassium-transporting ATPase subunit beta-1 OS=Rattus norvegicus OX=10116 GN=Atp1b1 PE=1 SV=1 - [AT1B1_RAT]	10	30	0.358143	0.759065	0.772534	0.399827	0.313048	0.477481	0.327015	0.387911
F1LRM7	Collagen alpha-1(II) chain OS=Rattus norvegicus OX=10116 GN=Col2a1 PE=1 SV=1 - [F1LRM7_RAT]	12	84	-1.74306	-1.31734	-1.12733	-1.6316	-1.02802	-0.815243	-0.734499	-0.749361
A0A0G2JVK5	Adhesion G protein-coupled receptor E4 OS=Rattus norvegicus OX=10116 GN=Adgre4 PE=1 SV=1 - [A0A0G2JVK5_RAT]	1	2	0.765071	0.49608	0.76339	0.649989	0.246752	0.201952	0.202845	0.257147
G3V9J1	Uncharacterized protein OS=Rattus norvegicus OX=10116 PE=1 SV=3 - [G3V9J1_RAT]	4	62	-0.199588	-0.421133	-0.203346	-0.138377	-0.340114	-0.452714	-0.474159	-0.444515
A0A0G2JWE3	Protein IWS1 homolog OS=Rattus norvegicus OX=10116 GN=Iws1 PE=1 SV=1 - [A0A0G2JWE3_RAT]	7	14	-0.0472322	-0.187058	0.224583	0.447485	0.357157	0.315502	0.28844	0.316319
D4A1F2	[F-actin]-monooxygenase MICAL2 OS=Rattus norvegicus OX=10116 GN=Mical2 PE=3 SV=1 - [MICA2_RAT]	1	2	-0.548526	-0.393488	-0.195148	-0.480338	0.225467	0.706008	0.604825	0.480174
D3ZAA3	Latent-transforming growth factor beta-binding protein 1 OS=Rattus norvegicus OX=10116 GN=Ltbp1 PE=1 SV=2 - [D3ZAA3_RAT]	7	23	-0.47166	-0.283153	-0.116688	-0.191771	0.149174	0.46334	0.481641	0.507952
Q6AYN2	Store-operated calcium entry-associated regulatory factor OS=Rattus norvegicus OX=10116 GN=Saraf PE=2 SV=1 - [SARAF_RAT]	2	6	-0.0386429	0.0426504	0.129424	0.213249	-0.184809	-0.316695	-0.154585	-0.243054
D4A4P8	Protein tweety homolog OS=Rattus norvegicus OX=10116 GN=Ttyh2 PE=1 SV=2 - [D4A4P8_RAT]	3	7	-0.0754573	-0.367787	-0.36382	-0.158538	-0.242523	-0.233924	-0.260751	-0.232557
D3ZAX5	Calcium homeostasis endoplasmic reticulum protein OS=Rattus norvegicus OX=10116 GN=Cherp PE=1 SV=2 - [D3ZAX5_RAT]	16	33	0.0710739	0.054825	0.0240007	0.140979	0.326327	0.424902	0.284432	0.443349
Q811A9	Complement C5a receptor (Fragment) OS=Rattus norvegicus OX=10116 PE=3 SV=1 - [Q811A9_RAT]	1	2	0.488367	-0.0169433	0.264198	0.499385	0.458149	0.477527	0.509269	0.48693
A0A0G2JXF3	Centrosomal protein of 63 kDa OS=Rattus norvegicus OX=10116 GN=Cep63 PE=4 SV=1 - [A0A0G2JXF3_RAT]	7	8	-0.0666276	-0.350655	-0.441578	-0.0438372	0.259625	0.409184	0.299321	0.446948
P04917	Serglycin OS=Rattus norvegicus OX=10116 GN=Srgn PE=1 SV=1 - [SRGN_RAT]	2	3	-0.0663259	-0.112573	0.131463	0.279087	0.371871	0.601271	0.624905	0.0187379
F1M7P1	DDB1 and CUL4-associated factor 13 OS=Rattus norvegicus OX=10116 GN=Dcaf13 PE=1 SV=1 - [F1M7P1_RAT]	4	5	-0.906288	-0.212318	0.121023	-0.122198	-0.416208	-0.433083	-0.516414	-0.635154
G3V6M8	Nucleoporin 37 OS=Rattus norvegicus OX=10116 GN=Nup37 PE=1 SV=1 - [G3V6M8_RAT]	6	15	0.384698	0.0774338	0.784931	0.926569	0.673419	0.576021	0.451474	0.321607
D4A051	Integrin alpha-7 OS=Rattus norvegicus OX=10116 GN=Itga7 PE=3 SV=2 - [D4A051_RAT]	3	4	-0.343832	0.358731	0.0171319	-0.574721	-0.840225	-0.935349	-0.174188	-0.245737
D3ZZK8	FSHD region gene 1 OS=Rattus norvegicus OX=10116 GN=Frg1 PE=1 SV=3 - [D3ZZK8_RAT]	1	1	-0.547938	-0.442402	-0.55907	-0.21408	-0.297915	-0.645426	-0.334179	-0.55463
Q3MIF1	Ubfd1 protein OS=Rattus norvegicus OX=10116 GN=Ubfd1 PE=1 SV=1 - [Q3MIF1_RAT]	5	13	0.303989	0.0272239	-0.256773	0.0765118	-0.165546	-0.560734	-0.491389	-0.531003
O70187	Nuclear factor 1 OS=Rattus norvegicus OX=10116 GN=Nfib PE=1 SV=2 - [O70187_RAT]	3	15	-0.63129	-0.338682	-0.316134	-0.468771	-0.267295	-0.134055	-0.109508	-0.101549
Q5HZE4	Methylthioribose-1-phosphate isomerase OS=Rattus norvegicus OX=10116 GN=Mri1 PE=1 SV=1 - [MTNA_RAT]	3	7	0.417077	0.149979	0.367089	0.107597	0.294829	0.400998	0.364431	0.355075
F1LUW0	Uncharacterized protein OS=Rattus norvegicus OX=10116 PE=4 SV=2 - [F1LUW0_RAT]	2	2	0.54619	0.940849	0.679721	0.525398	0.7362	0.744235	0.673162	0.837933
D4AE63	Myogenesis-regulating glycosidase OS=Rattus norvegicus OX=10116 GN=Myorg PE=1 SV=1 - [D4AE63_RAT]	2	2	0.29718	0.855284	0.645706	0.311573	0.484019	0.433876	0.473883	0.397363
D3ZIM7	Family with sequence similarity 177, member A1 OS=Rattus norvegicus OX=10116 GN=Fam177a1 PE=1 SV=1 - [D3ZIM7_RAT]	2	4	-0.721549	-1.08028	-0.846325	-0.354968	-0.376783	-0.402915	-0.256402	-0.262406
[truncated: 4,666 more rows]
