# Supplementary material for: Liver Proteome Profile of Growth Restricted and Appropriately Grown Newborn Wistar Rats Associated with Maternal Undernutrition
Source: Preprints.org preprint supplement (doi:10.20944/preprints202103.0023.v1), 2021-03-01
Supplement: Supplementary file 2 [file Supp Table 2.xlsx]

## Sheet: FGR vs. C q<0.05_2up_0.58
accession	Description	Σ# Unique Peptides	FGR1/C	FGR2/C	FGR3/C	FGR4/C	non-FGR1/C	non-FGR2/C	non-FGR3/C	non-FGR4/C	FGR vs. C	non-FGR vs. C	q value
G3V8R3	Globin e1 OS=Rattus norvegicus OX=10116 GN=Hbz PE=3 SV=1 - [G3V8R3_RAT]	6	2.53793	1.9772	1.93058	2.95605	1.91282	1.37227	1.23361	1.19437	2.35044	1.42827	0.001238
D3ZMT4	Histidine decarboxylase OS=Rattus norvegicus OX=10116 GN=Hdc PE=4 SV=3 - [D3ZMT4_RAT]	8	2.54668	3.01912	2.07831	1.47965	1.0454	1.30968	1.24555	1.14029	2.28094	1.18523	0.004133
Q8R4A1	ERO1-like protein alpha OS=Rattus norvegicus OX=10116 GN=Ero1a PE=1 SV=1 - [ERO1A_RAT]	5	2.48332	2.036	2.41605	1.62494	0.964302	0.772263	0.805296	0.994707	2.14007	0.884142	0.000791
P01946	Hemoglobin subunit alpha-1/2 OS=Rattus norvegicus OX=10116 GN=Hba1 PE=1 SV=3 - [HBA_RAT]	2	2.4691	1.88202	1.64394	1.68061	1.17992	1.03624	0.991328	0.96216	1.91892	1.04241	0.001051
O88752	Epsilon 1 globin OS=Rattus norvegicus OX=10116 GN=Hbe1 PE=1 SV=1 - [O88752_RAT]	7	2.15809	1.58381	1.3989	2.26818	1.41966	0.953743	0.85425	0.744668	1.85224	0.99308	0.001736
Q63118	Calcitonin gene-related peptide type 1 receptor OS=Rattus norvegicus OX=10116 GN=Calcrl PE=2 SV=1 - [CALRL_RAT]	2	1.58599	2.11252	2.02549	1.60188	0.679578	0.636409	0.644029	0.773209	1.83147	0.683306	0.000392
Q58HA5	Carbonic anhydrase XII (Fragment) OS=Rattus norvegicus OX=10116 PE=2 SV=1 - [Q58HA5_RAT]	3	1.72493	1.59342	1.98431	1.51033	1.21366	1.23786	1.17756	1.15785	1.70325	1.19673	0.000185
O88754	Epsilon 3 globin OS=Rattus norvegicus OX=10116 GN=Hbg1 PE=2 SV=1 - [O88754_RAT]	7	2.00727	1.20326	1.02389	1.80824	1.22571	0.911312	0.923612	0.873407	1.51067	0.983509	0.005551
A0A0G2K8H2	Similar to BC067074 protein OS=Rattus norvegicus OX=10116 GN=RGD1561161 PE=4 SV=1 - [A0A0G2K8H2_RAT]	2	1.76676	0.769456	1.24499	1.87241	0.66322	-0.0972324	0.172003	-1.13499	1.4134	-0.0992508	0.008966
Q6JE36	Protein NDRG1 OS=Rattus norvegicus OX=10116 GN=Ndrg1 PE=1 SV=1 - [NDRG1_RAT]	7	1.20242	1.50412	1.19322	1.38	1.39351	1.03467	0.960998	0.861608	1.31994	1.0627	0.000166
P04182	Ornithine aminotransferase, mitochondrial OS=Rattus norvegicus OX=10116 GN=Oat PE=1 SV=1 - [OAT_RAT]	17	1.58788	1.2512	1.5428	0.881868	0.467303	0.570596	0.606504	0.678119	1.31594	0.580631	0.002306
A0A0F7R5I4	Alanine/serine/cysteine/threonine transporter 1 OS=Rattus norvegicus OX=10116 GN=ratASCT1 PE=2 SV=1 - [A0A0F7R5I4_RAT]	5	1.02326	1.65504	1.35383	1.20153	0.836444	0.719452	0.670045	0.608257	1.30841	0.70855	0.00121
D4A3V0	Eva-1 homolog A, regulator of programmed cell death OS=Rattus norvegicus OX=10116 GN=Eva1a PE=1 SV=1 - [D4A3V0_RAT]	2	1.39508	1.1248	1.40829	1.28028	1.31567	1.48586	1.49509	1.62185	1.30211	1.47962	0.000122
A0A0G2K2S2	Solute carrier family 2, facilitated glucose transporter member 1 OS=Rattus norvegicus OX=10116 GN=Slc2a1 PE=1 SV=1 - [A0A0G2K2S2_RAT]	3	0.871899	1.67177	1.33991	1.12766	0.812026	0.762905	0.717469	0.814603	1.25281	0.776751	0.00324
Q9JHZ9	Sodium-coupled neutral amino acid transporter 3 OS=Rattus norvegicus OX=10116 GN=Slc38a3 PE=2 SV=1 - [S38A3_RAT]	7	1.05648	1.53927	1.13769	1.17359	1.00766	0.848374	0.836449	0.916047	1.22676	0.902134	0.000629
Q9ET45	BCL2-interacting protein 3 OS=Rattus norvegicus OX=10116 GN=Bnip3 PE=1 SV=1 - [Q9ET45_RAT]	3	1.04875	1.40233	1.26097	1.11983	0.662869	0.387788	0.412162	0.297359	1.20797	0.440044	0.000224
Q71DI1	Dermcidin OS=Rattus norvegicus OX=10116 PE=2 SV=1 - [Q71DI1_RAT]	3	0.83874	1.541	1.51417	0.755393	0.549098	0.411285	0.44974	1.61912	1.16232	0.757311	0.008985
P17425	Hydroxymethylglutaryl-CoA synthase, cytoplasmic OS=Rattus norvegicus OX=10116 GN=Hmgcs1 PE=1 SV=1 - [HMCS1_RAT]	7	1.16711	1.27817	1.00955	1.09569	0.72014	0.681689	0.582199	0.593993	1.13763	0.644505	0.000108
Q5PQU1	Kininogen 1 OS=Rattus norvegicus OX=10116 GN=Kng2 PE=2 SV=1 - [Q5PQU1_RAT]	3	1.24253	1.14175	0.951539	1.21217	0.366534	-0.152941	-0.223568	-0.281193	1.137	-0.0727919	0.000167
M0RCI5	Phospholipase A2, group XIIB OS=Rattus norvegicus OX=10116 GN=Pla2g12b PE=1 SV=1 - [M0RCI5_RAT]	3	1.21303	1.05136	0.881035	1.34955	0.895789	0.459809	0.404414	0.50259	1.12374	0.56565	0.000718
A0A096MJY1	Glypican 6 OS=Rattus norvegicus OX=10116 GN=Gpc6 PE=1 SV=1 - [A0A096MJY1_RAT]	7	1.31324	0.690069	1.28589	1.17274	1.09522	1.29601	1.20965	1.07495	1.11549	1.16896	0.002799
O54953	Stearoyl-CoA desaturase 2 (Fragment) OS=Rattus norvegicus OX=10116 PE=2 SV=1 - [O54953_RAT]	3	0.897945	1.65518	1.21959	0.613663	1.42276	1.6842	1.54194	1.57501	1.0966	1.55598	0.013767
F1M6T7	Glutamate-rich 5 OS=Rattus norvegicus OX=10116 GN=Erich5 PE=1 SV=3 - [F1M6T7_RAT]	11	1.01166	0.885656	1.01832	1.44955	0.721865	0.515048	0.468057	0.528391	1.0913	0.55834	0.001582
D4A883	60S ribosomal protein L29 OS=Rattus norvegicus OX=10116 PE=3 SV=1 - [D4A883_RAT]	2	1.21792	1.38809	1.09138	0.545517	0.0104192	0.143179	-0.0578851	0.303737	1.06073	0.0998625	0.007445
D3ZQY4	FRY-like transcription coactivator OS=Rattus norvegicus OX=10116 GN=Fryl PE=1 SV=2 - [D3ZQY4_RAT]	2	1.35621	0.829867	1.08878	0.904033	1.22935	1.45471	1.47938	1.42721	1.04472	1.39767	0.001637
Q4G063	Cysteine-rich with EGF-like domain protein 2 OS=Rattus norvegicus OX=10116 GN=Creld2 PE=1 SV=1 - [CREL2_RAT]	10	1.01861	1.11155	0.803304	1.19951	0.473662	0.00387892	0.0145784	-0.00288752	1.03324	0.122308	0.000552
D3ZI66	Ring finger protein 149 OS=Rattus norvegicus OX=10116 GN=Rnf149 PE=1 SV=1 - [D3ZI66_RAT]	3	1.22185	0.816643	1.40207	0.668437	0.552584	0.619348	0.859018	0.805339	1.02725	0.709072	0.006618
B1H249	Glucosamine-phosphate N-acetyltransferase 1 OS=Rattus norvegicus OX=10116 GN=Gnpnat1 PE=1 SV=1 - [B1H249_RAT]	4	1.18143	0.967787	0.929517	1.02868	0.854948	0.623907	0.522409	0.525694	1.02685	0.631739	0.000138
A0A0G2K6V6	Kinesin family member 16B OS=Rattus norvegicus OX=10116 GN=Kif16b PE=3 SV=1 - [A0A0G2K6V6_RAT]	2	1.39391	1.11927	0.994015	0.590923	0.575332	0.663683	0.667498	0.841062	1.02453	0.686894	0.006222
A0A0A0MY09	Endoplasmin OS=Rattus norvegicus OX=10116 GN=Hsp90b1 PE=1 SV=1 - [A0A0A0MY09_RAT]	51	1.03106	0.897394	1.04877	1.07695	0.74158	0.61603	0.616387	0.676016	1.01354	0.662503	5.7e-05
A0A0A0MXX1	A-kinase anchor protein 7 isoforms delta and gamma OS=Rattus norvegicus OX=10116 GN=Akap7 PE=4 SV=1 - [A0A0A0MXX1_RAT]	2	0.919946	0.869874	1.27167	0.984174	0.817383	0.700039	0.728465	0.901975	1.01142	0.786965	0.000669
F1M547	Zinc finger homeobox 3 OS=Rattus norvegicus OX=10116 GN=Zfhx3 PE=4 SV=2 - [F1M547_RAT]	2	0.980567	0.763244	1.32158	0.952415	0.452302	0.271721	0.257543	0.461108	1.00445	0.360669	0.001796
B0K018	Phospholipase A2, group XIIA OS=Rattus norvegicus OX=10116 GN=Pla2g12a PE=2 SV=1 - [B0K018_RAT]	2	0.9153	1.23454	0.744682	1.12247	0.90932	0.520116	0.202651	-0.00768145	1.00425	0.406101	0.001408
P04916	Retinol-binding protein 4 OS=Rattus norvegicus OX=10116 GN=Rbp4 PE=1 SV=1 - [RET4_RAT]	4	1.09588	0.604738	1.37667	0.92295	-0.0714862	-0.20165	-0.19187	-0.269144	1.00006	-0.183538	0.006304
Q5FWU3	Autophagy-related protein 9A OS=Rattus norvegicus OX=10116 GN=Atg9a PE=1 SV=1 - [ATG9A_RAT]	3	1.21509	0.966764	0.808734	1.00119	0.368757	0.388793	0.312746	0.450481	0.997947	0.380194	0.000575
P63312	Thymosin beta-10 OS=Rattus norvegicus OX=10116 GN=Tmsb10 PE=1 SV=2 - [TYB10_RAT]	5	1.39785	1.16715	0.483165	0.87003	0.287356	-0.126416	-0.205747	-0.223647	0.979549	-0.0671138	0.013239
P40241	CD9 antigen OS=Rattus norvegicus OX=10116 GN=Cd9 PE=1 SV=2 - [CD9_RAT]	5	0.932291	1.27231	1.06432	0.538506	0.917223	1.21774	1.17236	1.15544	0.951856	1.11569	0.006098
M0R3V4	Myeloid-derived growth factor OS=Rattus norvegicus OX=10116 GN=Mydgf PE=1 SV=2 - [M0R3V4_RAT]	3	1.15948	0.656108	1.09817	0.870957	0.325845	0.251802	0.220348	0.339824	0.946178	0.284455	0.00208
Q5Y4N8	Adhesion G protein-coupled receptor E2 OS=Rattus norvegicus OX=10116 GN=Adgre1 PE=2 SV=1 - [AGRE1_RAT]	3	0.839764	0.730729	1.04453	1.13667	0.445778	0.538513	0.711183	0.376067	0.937921	0.517885	0.001036
Q6P136	Hyou1 protein OS=Rattus norvegicus OX=10116 GN=Hyou1 PE=1 SV=1 - [Q6P136_RAT]	2	0.738444	0.903436	1.07945	1.00781	0.702335	0.686691	0.660807	0.66041	0.932285	0.677561	0.000472
F1M3Q1	Interferon-induced transmembrane protein 1 OS=Rattus norvegicus OX=10116 GN=Ifitm1 PE=4 SV=2 - [F1M3Q1_RAT]	2	0.664766	1.12845	1.13773	0.775015	0.629579	0.647968	0.617537	0.540529	0.92649	0.608903	0.002949
A0A0G2JYJ6	MARVEL (Membrane-associating) domain containing 2 (Predicted) OS=Rattus norvegicus OX=10116 GN=Marveld2 PE=1 SV=1 - [A0A0G2JYJ6_RAT]	3	0.675455	0.854629	1.08256	1.08961	0.483457	0.335439	0.311345	0.449795	0.925562	0.395009	0.001352
F1LM87	C-type lectin domain family 4 member M OS=Rattus norvegicus OX=10116 GN=Clec4m PE=1 SV=2 - [F1LM87_RAT]	2	0.682031	0.524292	1.53595	0.935314	0.445954	0.148772	0.0388879	-0.0106993	0.919397	0.155729	0.02401
A0A0G2K8N3	Prolyl 3-hydroxylase 2 OS=Rattus norvegicus OX=10116 GN=P3h2 PE=1 SV=1 - [A0A0G2K8N3_RAT]	4	0.677244	0.967129	1.12701	0.902996	0.832691	0.695052	0.631487	0.491356	0.918594	0.662646	0.001127
P56627	Aquaporin-9 OS=Rattus norvegicus OX=10116 GN=Aqp9 PE=2 SV=1 - [AQP9_RAT]	4	1.01074	0.953041	0.929481	0.759221	0.93685	1.14459	1.07419	1.36285	0.913121	1.12962	0.000178
H9BFG4	Interleukin-6 receptor subunit beta OS=Rattus norvegicus OX=10116 GN=Il6st PE=2 SV=2 - [H9BFG4_RAT]	11	0.834723	0.673223	1.02915	1.09541	0.817808	0.849324	0.787973	0.791983	0.908126	0.811772	0.001393
Q3B8R6	Alpha-2-glycoprotein 1, zinc OS=Rattus norvegicus OX=10116 GN=Azgp1 PE=1 SV=1 - [Q3B8R6_RAT]	5	1.07425	0.834064	0.996934	0.701985	0.42854	0.390659	0.281371	0.566587	0.901809	0.416789	0.000791
D4A678	Spectrin, alpha, erythrocytic 1 OS=Rattus norvegicus OX=10116 GN=Spta1 PE=1 SV=3 - [D4A678_RAT]	62	1.22933	0.446896	0.782066	1.14367	0.751694	0.597056	0.597883	0.606265	0.900489	0.638225	0.01228
M0R8H7	Interferon alpha and beta receptor subunit 2 OS=Rattus norvegicus OX=10116 GN=Ifnar2 PE=1 SV=2 - [M0R8H7_RAT]	3	0.744276	0.453939	1.27272	1.09058	0.468021	0.322098	0.459397	0.604658	0.890379	0.463543	0.013944
E0X583	Stabilin-2/HARE OS=Rattus norvegicus OX=10116 GN=Stab2 PE=2 SV=2 - [E0X583_RAT]	26	0.669894	0.959323	1.23734	0.682595	0.590275	0.761084	0.662781	0.683171	0.887287	0.674328	0.004975
Q5XI36	CD97 molecule OS=Rattus norvegicus OX=10116 GN=Adgre5 PE=2 SV=1 - [Q5XI36_RAT]	3	1.05431	0.438221	1.10244	0.879875	1.01677	1.30429	1.2516	1.13891	0.86871	1.17789	0.007739
Q63081	Protein disulfide-isomerase A6 OS=Rattus norvegicus OX=10116 GN=Pdia6 PE=1 SV=2 - [PDIA6_RAT]	19	0.953087	0.740965	0.846867	0.89401	0.647949	0.587795	0.528003	0.557763	0.858732	0.580378	0.00012
D4A3M7	BSD domain-containing 1 OS=Rattus norvegicus OX=10116 GN=Bsdc1 PE=1 SV=3 - [D4A3M7_RAT]	10	0.821814	0.845767	0.689825	1.07077	0.555878	0.374892	0.274472	0.328195	0.857044	0.383359	0.000769
P18418	Calreticulin OS=Rattus norvegicus OX=10116 GN=Calr PE=1 SV=1 - [CALR_RAT]	32	0.889835	0.779699	0.736916	0.972532	0.427526	0.170452	0.168245	0.18589	0.844746	0.238028	0.000194
B0BNN1	Gltpd2 protein OS=Rattus norvegicus OX=10116 GN=Gltpd2 PE=2 SV=1 - [B0BNN1_RAT]	2	0.648269	1.13772	0.823175	0.766062	1.05819	1.33369	1.13658	1.2993	0.843806	1.20694	0.002294
B2RYD0	Ube2g2 protein OS=Rattus norvegicus OX=10116 GN=Ube2g2 PE=1 SV=1 - [B2RYD0_RAT]	3	1.08567	0.663809	0.979723	0.634083	0.620943	0.778823	0.555226	0.885481	0.840821	0.710118	0.003398
P06762	Heme oxygenase 1 OS=Rattus norvegicus OX=10116 GN=Hmox1 PE=1 SV=1 - [HMOX1_RAT]	7	0.809046	0.710541	1.05179	0.78572	-0.0426928	-0.170134	-0.161042	-0.129269	0.839274	-0.125784	0.000632
Q91Y94	Cytochrome c oxidase subunit 4 isoform 2, mitochondrial OS=Rattus norvegicus OX=10116 GN=Cox4i2 PE=2 SV=1 - [COX42_RAT]	4	0.72431	1.08329	1.17281	0.363304	0.338771	0.593833	0.527458	0.472103	0.835927	0.483041	0.01799
Q5XI73	Rho GDP-dissociation inhibitor 1 OS=Rattus norvegicus OX=10116 GN=Arhgdia PE=1 SV=1 - [GDIR1_RAT]	7	1.26979	0.688209	0.632521	0.731563	0.679175	0.678988	0.545661	0.685022	0.83052	0.647211	0.008646
A0A0G2JVQ5	Kininogen-1 OS=Rattus norvegicus OX=10116 GN=Kng1 PE=1 SV=1 - [A0A0G2JVQ5_RAT]	4	0.901621	0.845403	0.802794	0.769669	0.0667926	-0.347852	-0.325001	-0.211087	0.829872	-0.204287	4e-05
G3V837	CD1d1 antigen OS=Rattus norvegicus OX=10116 GN=Cd1d1 PE=1 SV=1 - [G3V837_RAT]	6	1.19563	0.45831	0.659972	1.00326	1.2922	1.46615	1.38424	1.37157	0.829292	1.37854	0.012622
D3ZH59	Adhesion G protein-coupled receptor L3 OS=Rattus norvegicus OX=10116 GN=Adgrl3 PE=1 SV=3 - [D3ZH59_RAT]	3	0.636474	0.707566	0.97784	0.9682	0.77217	0.639444	0.352137	0.436294	0.82252	0.550011	0.00134
O35760	Isopentenyl-diphosphate Delta-isomerase 1 OS=Rattus norvegicus OX=10116 GN=Idi1 PE=2 SV=2 - [IDI1_RAT]	6	1.30806	0.822288	0.508136	0.642393	0.0114186	-0.0944688	-0.0542403	-0.210669	0.820219	-0.0869899	0.015777
O70352	CD82 antigen OS=Rattus norvegicus OX=10116 GN=Cd82 PE=1 SV=1 - [CD82_RAT]	2	0.772338	0.550891	1.05857	0.875722	1.35308	1.65847	1.70138	1.58064	0.814381	1.57339	0.002885
G3V7H2	Multiple inositol polyphosphate phosphatase 1 OS=Rattus norvegicus OX=10116 GN=Minpp1 PE=3 SV=1 - [G3V7H2_RAT]	10	0.864809	0.69979	0.737408	0.95237	0.377447	0.133221	0.248428	-0.0115215	0.813594	0.186894	0.00032
Q5M8B4	Ficolin (Collagen/fibrinogen domain containing) 1 OS=Rattus norvegicus OX=10116 GN=Fcna PE=1 SV=1 - [Q5M8B4_RAT]	5	1.05904	0.544367	1.07175	0.562488	0.360506	0.403371	0.415388	0.257847	0.809412	0.359278	0.009585
B5DFA0	Vil1 protein OS=Rattus norvegicus OX=10116 GN=Vil1 PE=1 SV=1 - [B5DFA0_RAT]	15	0.874163	0.940868	0.64007	0.773709	0.862259	0.784854	0.807455	0.765227	0.807203	0.804949	0.000495
Q8R1R5	CD99 antigen-like protein 2 OS=Rattus norvegicus OX=10116 GN=Cd99l2 PE=2 SV=1 - [C99L2_RAT]	3	0.720905	0.757112	0.990023	0.756353	0.414054	0.470793	0.547067	0.508577	0.806098	0.485123	0.00041
B5DF91	ELAV-like protein 1 OS=Rattus norvegicus OX=10116 GN=Elavl1 PE=1 SV=1 - [ELAV1_RAT]	9	1.01584	0.939732	0.51925	0.741579	0.491224	0.237095	0.278524	0.217501	0.804101	0.306086	0.003576
O70377	Synaptosomal-associated protein 23 OS=Rattus norvegicus OX=10116 GN=Snap23 PE=1 SV=1 - [SNP23_RAT]	12	0.755124	0.778382	0.845425	0.819711	0.534532	0.51421	0.498322	0.458829	0.799661	0.501473	1.3e-05
Q5PQN0	Neurocalcin-delta OS=Rattus norvegicus OX=10116 GN=Ncald PE=1 SV=3 - [NCALD_RAT]	2	0.855478	0.757886	0.847426	0.721771	0.359846	0.488034	0.411433	0.516808	0.79564	0.44403	6.6e-05
P54921	Alpha-soluble NSF attachment protein OS=Rattus norvegicus OX=10116 GN=Napa PE=1 SV=2 - [SNAA_RAT]	13	0.799386	0.606092	0.821179	0.948276	0.875377	0.84452	0.856907	0.848302	0.793733	0.856276	0.000653
Q64240	Protein AMBP OS=Rattus norvegicus OX=10116 GN=Ambp PE=1 SV=1 - [AMBP_RAT]	10	0.864455	0.769322	0.619692	0.91372	0.171688	-0.0232128	0.00579651	0.0566366	0.791797	0.0527271	0.000492
Q9JJ40	Na(+)/H(+) exchange regulatory cofactor NHE-RF3 OS=Rattus norvegicus OX=10116 GN=Pdzk1 PE=1 SV=2 - [NHRF3_RAT]	29	0.819639	0.633603	0.843364	0.867477	0.412177	0.285581	0.228641	0.317971	0.791021	0.311093	0.0003
P04785	Protein disulfide-isomerase OS=Rattus norvegicus OX=10116 GN=P4hb PE=1 SV=2 - [PDIA1_RAT]	40	0.802676	0.791723	0.641091	0.917942	0.283455	-0.0617611	-0.0672195	-0.0910645	0.788358	0.0158526	0.000348
A3RLA8	Fc fragment of IgG receptor IIb OS=Rattus norvegicus OX=10116 GN=Fcgr2b PE=1 SV=1 - [A3RLA8_RAT]	3	0.733508	0.845635	1.0194	0.538209	0.18226	0.26539	0.422245	0.4326	0.784188	0.325624	0.002674
D3ZE26	Similar to RIKEN cDNA 1110063G11 (Predicted) OS=Rattus norvegicus OX=10116 GN=Tmcc2 PE=1 SV=1 - [D3ZE26_RAT]	6	0.966352	0.404482	0.764173	0.992	0.823653	0.681572	0.706715	0.742565	0.781752	0.738626	0.00817
P34900	Syndecan-2 OS=Rattus norvegicus OX=10116 GN=Sdc2 PE=2 SV=2 - [SDC2_RAT]	4	0.754581	0.410083	0.930092	1.03163	0.319961	0.203774	0.249382	0.144505	0.781596	0.229405	0.008039
Q6IE17	Stefin A2 OS=Rattus norvegicus OX=10116 GN=Stfa2l1 PE=2 SV=1 - [Q6IE17_RAT]	2	1.17036	0.653211	0.385678	0.916588	0.614009	0.416889	0.429733	0.483302	0.781458	0.485983	0.016151
D4A533	Transmembrane anterior posterior transformation 1 OS=Rattus norvegicus OX=10116 GN=Tapt1 PE=1 SV=3 - [D4A533_RAT]	4	0.463597	0.552481	0.611397	1.49203	1.10201	0.531087	0.331036	0.0540207	0.779877	0.504539	0.047405
A0A0G2KB82	CCR4-NOT transcription complex, subunit 2 OS=Rattus norvegicus OX=10116 GN=Cnot2 PE=1 SV=1 - [A0A0G2KB82_RAT]	2	0.978315	0.638855	0.459775	1.03278	0.892312	0.476898	0.418606	0.610037	0.777432	0.599463	0.008195
B2GV51	Nudt13 protein OS=Rattus norvegicus OX=10116 GN=Nudt13 PE=2 SV=1 - [B2GV51_RAT]	2	1.06645	0.711392	1.11813	0.212091	0.42123	0.593242	0.618556	0.577142	0.777015	0.552542	0.032622
F1LND7	Farnesyl pyrophosphate synthase OS=Rattus norvegicus OX=10116 GN=Fdps PE=1 SV=3 - [F1LND7_RAT]	12	0.988846	0.810326	0.744237	0.551364	0.146463	0.015763	0.0401863	0.077699	0.773693	0.0700278	0.001903
Q6IN10	Endothelin converting enzyme 1, isoform CRA_a OS=Rattus norvegicus OX=10116 GN=Ece1 PE=1 SV=1 - [Q6IN10_RAT]	18	0.772139	0.578347	1.05587	0.685286	0.671784	0.868133	0.871383	0.832673	0.77291	0.810993	0.002984
Q5PQT2	Myotubularin-related protein 3 OS=Rattus norvegicus OX=10116 GN=Mtmr3 PE=1 SV=1 - [MTMR3_RAT]	2	0.940037	0.25743	0.710441	1.1796	0.620247	0.468799	0.383511	0.694678	0.771877	0.541809	0.02728
Q3B7D0	Oxygen-dependent coproporphyrinogen-III oxidase, mitochondrial OS=Rattus norvegicus OX=10116 GN=Cpox PE=1 SV=1 - [HEM6_RAT]	17	1.22199	0.44695	0.685727	0.727819	0.187891	0.128746	0.190767	0.18068	0.770623	0.172021	0.014683
Q02769	Squalene synthase OS=Rattus norvegicus OX=10116 GN=Fdft1 PE=2 SV=1 - [FDFT_RAT]	10	0.490928	0.920316	1.20519	0.459597	0.372467	0.560852	0.568746	0.622073	0.769008	0.531034	0.021241
P0C5H9	Mesencephalic astrocyte-derived neurotrophic factor OS=Rattus norvegicus OX=10116 GN=Manf PE=1 SV=1 - [MANF_RAT]	15	0.753061	0.897677	0.596915	0.820612	0.247334	-0.00107647	-0.112349	-0.0692098	0.767066	0.0161746	0.000551
D3ZY50	ATP synthase mitochondrial F1 complex assembly factor 1 OS=Rattus norvegicus OX=10116 GN=Atpaf1 PE=1 SV=1 - [D3ZY50_RAT]	2	0.673847	0.804868	0.618604	0.944146	0.499571	0.18654	0.175497	0.129411	0.760366	0.247755	0.000845
P21743	Insulin-like growth factor-binding protein 1 OS=Rattus norvegicus OX=10116 GN=Igfbp1 PE=1 SV=2 - [IBP1_RAT]	6	0.888545	0.931142	0.687634	0.519566	0.503512	0.538535	0.362817	0.573247	0.756722	0.494527	0.002387
Q63921	Prostaglandin G/H synthase 1 OS=Rattus norvegicus OX=10116 GN=Ptgs1 PE=2 SV=2 - [PGH1_RAT]	4	0.683999	0.68128	1.18405	0.458208	0.50253	0.77278	0.570165	0.573017	0.751883	0.604623	0.013285
Q6PCU4	Emd protein OS=Rattus norvegicus OX=10116 GN=Emd PE=1 SV=1 - [Q6PCU4_RAT]	9	0.691092	0.80214	0.745471	0.73695	0.954596	0.989247	0.981826	0.835121	0.743913	0.940197	2.6e-05
O70534	Protein delta homolog 1 OS=Rattus norvegicus OX=10116 GN=Dlk1 PE=1 SV=1 - [DLK1_RAT]	5	0.548552	0.916442	0.578573	0.919905	0.617637	0.441032	0.206053	0.13302	0.740868	0.349436	0.00353
Q5U2Y0	WD repeat domain phosphoinositide-interacting protein 4 OS=Rattus norvegicus OX=10116 GN=Wdr45 PE=2 SV=1 - [WIPI4_RAT]	2	0.575612	0	1.12557	1.25464	-0.600808	0	0	0	0.738957	-0.150202	0.011951
Q64244	ADP-ribosyl cyclase/cyclic ADP-ribose hydrolase 1 OS=Rattus norvegicus OX=10116 GN=Cd38 PE=1 SV=1 - [CD38_RAT]	3	0.840508	0.581472	0.95115	0.55896	0.451039	0.792524	0.64914	0.790165	0.733022	0.670717	0.002949
P04937	Fibronectin OS=Rattus norvegicus OX=10116 GN=Fn1 PE=1 SV=2 - [FINC_RAT]	3	0.613107	0.35695	0.891671	1.02766	0.710291	0.677662	0.523198	0.631626	0.722346	0.635694	0.014027
Q63135	Complement component receptor 1-like protein OS=Rattus norvegicus OX=10116 GN=Cr1l PE=1 SV=1 - [CR1L_RAT]	8	0.760204	0.573086	0.840168	0.715858	0.818431	0.889749	0.793182	0.833679	0.722329	0.83376	0.000455
P04906	Glutathione S-transferase P OS=Rattus norvegicus OX=10116 GN=Gstp1 PE=1 SV=2 - [GSTP1_RAT]	4	1.02409	0.880988	0.412033	0.571089	0.236352	0.0849905	0.0145201	0.152096	0.722051	0.12199	0.011293
M0R7K1	Protein lin-7 homolog OS=Rattus norvegicus OX=10116 GN=Lin7a PE=1 SV=2 - [M0R7K1_RAT]	5	0.753793	0.663001	0.678829	0.78842	0.611412	0.530618	0.518946	0.351502	0.721011	0.50312	6.4e-05
A0A0G2K6U1	Vesicle-fusing ATPase OS=Rattus norvegicus OX=10116 GN=Nsf PE=1 SV=1 - [A0A0G2K6U1_RAT]	31	0.524499	0.776849	0.986912	0.595187	0.646198	0.712919	0.779538	0.706325	0.720862	0.711245	0.004161
P21272	CCAAT/enhancer-binding protein beta OS=Rattus norvegicus OX=10116 GN=Cebpb PE=1 SV=1 - [CEBPB_RAT]	5	0.598365	0.710576	1.06628	0.507226	0.0634834	0.141996	0.161134	0.21075	0.720613	0.144341	0.007315
Q642E3	CDK5 regulatory subunit associated protein 3, isoform CRA_b OS=Rattus norvegicus OX=10116 GN=Cdk5rap3 PE=1 SV=1 - [Q642E3_RAT]	14	0.913127	0.567451	0.655974	0.735886	0.543539	0.417324	0.444645	0.430511	0.71811	0.459005	0.001074
P97675	Ectonucleotide pyrophosphatase/phosphodiesterase family member 3 OS=Rattus norvegicus OX=10116 GN=Enpp3 PE=1 SV=2 - [ENPP3_RAT]	19	0.899462	0.497866	0.89529	0.558269	0.38018	0.532447	0.492641	0.532409	0.712722	0.484419	0.004723
D3ZF49	Transmembrane serine protease 6 OS=Rattus norvegicus OX=10116 GN=Tmprss6 PE=1 SV=1 - [D3ZF49_RAT]	2	1.06091	0.503669	0.683352	0.601784	0.513739	0.844627	0.631095	0.768154	0.712428	0.689404	0.007678
D4A7D7	Hexose-6-phosphate dehydrogenase (Glucose 1-dehydrogenase) (Predicted), isoform CRA_b OS=Rattus norvegicus OX=10116 GN=H6pd PE=1 SV=1 - [D4A7D7_RAT]	22	0.690054	0.844532	1.00545	0.307622	0.198108	0.365916	0.409951	0.446432	0.711915	0.355102	0.014783
B0BNN0	Tissue-specific transplantation antigen P35B OS=Rattus norvegicus OX=10116 GN=Tsta3 PE=1 SV=1 - [B0BNN0_RAT]	3	1.10582	0.729592	0.908917	0.103086	0.464174	0.745397	0.812142	0.611803	0.711854	0.658379	0.046806
Q5VLR5	BWK4 OS=Rattus norvegicus OX=10116 GN=Erp44 PE=1 SV=1 - [Q5VLR5_RAT]	11	0.750853	0.607345	0.658494	0.830415	0.627766	0.520574	0.375761	0.452689	0.711777	0.494197	0.000293
Q5XID0	Protein YIPF5 OS=Rattus norvegicus OX=10116 GN=Yipf5 PE=2 SV=1 - [YIPF5_RAT]	2	0.558407	1.07012	0.49217	0.722638	0.132842	0.366076	0.271674	0.266951	0.710834	0.259386	0.009245
G3V7K2	Leukemia inhibitory factor receptor OS=Rattus norvegicus OX=10116 GN=Lifr PE=1 SV=1 - [G3V7K2_RAT]	14	0.681131	0.559901	0.882618	0.708627	0.545077	0.572783	0.558676	0.428301	0.708069	0.526209	0.000803
Q9JI66	Electrogenic sodium bicarbonate cotransporter 1 OS=Rattus norvegicus OX=10116 GN=Slc4a4 PE=1 SV=1 - [S4A4_RAT]	6	0.409218	1.18465	0.971344	0.259336	0.0663503	-0.0154145	0.0518218	0.127862	0.706137	0.0576548	0.049312
Q9R1T1	Barrier-to-autointegration factor OS=Rattus norvegicus OX=10116 GN=Banf1 PE=1 SV=1 - [BAF_RAT]	6	0.559237	0.286967	1.01858	0.945483	0.501963	0.448262	0.347445	0.448071	0.702568	0.436435	0.0239
A0A140TAD7	JmjC domain-containing protein 8 OS=Rattus norvegicus OX=10116 GN=Jmjd8 PE=1 SV=1 - [A0A140TAD7_RAT]	3	0.833684	0.587611	0.7552	0.626888	0.509678	0.520441	0.745208	0.531707	0.700846	0.576758	0.000472
E3W9F8	Laminin, alpha 1 OS=Rattus norvegicus OX=10116 GN=Lama1 PE=2 SV=1 - [E3W9F8_RAT]	6	0.772399	0.487521	0.754113	0.783004	0.89212	0.904774	0.860012	1.09266	0.699259	0.937392	0.001036
D4A6E8	Similar to RIKEN cDNA 2410004B18 OS=Rattus norvegicus OX=10116 GN=RGD1560065 PE=1 SV=3 - [D4A6E8_RAT]	2	0.882457	0.669607	0.526037	0.710763	0.25978	-0.432441	-0.463424	-0.118146	0.697216	-0.188558	0.001191
D4A7F6	Collectin sub-family member 10 (C-type lectin) (Predicted) OS=Rattus norvegicus OX=10116 GN=Colec10 PE=1 SV=1 - [D4A7F6_RAT]	3	0.765632	0.386732	0.787124	0.844382	0.116478	-0.122952	0.00806653	0.104608	0.695967	0.0265499	0.004553
F1LPL6	Tyrosine-protein kinase receptor OS=Rattus norvegicus OX=10116 GN=Insr PE=1 SV=3 - [F1LPL6_RAT]	9	0.563196	0.664299	1.00436	0.551393	0.506026	0.583759	0.510144	0.569233	0.695811	0.542291	0.004952
D3ZNG0	Adhesion G protein-coupled receptor L2 OS=Rattus norvegicus OX=10116 GN=Adgrl2 PE=1 SV=4 - [D3ZNG0_RAT]	9	0.632259	0.527325	0.898501	0.722696	0.338226	0.241265	0.275585	0.308755	0.695195	0.290958	0.001624
Q6IMX7	Hsp70-binding protein 1 OS=Rattus norvegicus OX=10116 GN=Hspbp1 PE=1 SV=1 - [HPBP1_RAT]	2	0.941997	0.459078	0.760406	0.614652	0.704014	0.745528	0.714194	0.754487	0.694033	0.729556	0.004546
Q5M7T6	V-type proton ATPase subunit OS=Rattus norvegicus OX=10116 GN=Atp6v0d1 PE=1 SV=1 - [Q5M7T6_RAT]	8	0.862269	0.46201	0.921594	0.525064	0.530457	0.688155	0.611694	0.686958	0.692734	0.629316	0.006846
Q498E0	Thioredoxin domain-containing protein 12 OS=Rattus norvegicus OX=10116 GN=Txndc12 PE=2 SV=2 - [TXD12_RAT]	7	0.785662	0.771793	0.577258	0.632904	-0.103841	-0.315744	-0.372014	-0.442654	0.691904	-0.308563	0.00038
M0R9F7	Macrophage receptor with collagenous structure OS=Rattus norvegicus OX=10116 GN=Marco PE=1 SV=2 - [M0R9F7_RAT]	2	0.394776	0.589359	1.2073	0.556778	0.1639	0.156659	0.157085	0.296849	0.687053	0.193623	0.029471
D3ZSQ1	Pecanex homolog 3 OS=Rattus norvegicus OX=10116 GN=Pcnx3 PE=1 SV=1 - [D3ZSQ1_RAT]	2	0.630883	0.786067	0.596856	0.730448	0.571341	0.0445829	-0.0245487	0.111574	0.686064	0.175737	0.000222
Q66H15	Regulator of microtubule dynamics protein 3 OS=Rattus norvegicus OX=10116 GN=Rmdn3 PE=1 SV=1 - [RMD3_RAT]	6	0.686567	0.621647	0.78876	0.639396	0.270881	0.100713	0.0284595	0.0919948	0.684092	0.123012	0.000152
Q642B0	Glypican 4 OS=Rattus norvegicus OX=10116 GN=Gpc4 PE=1 SV=1 - [Q642B0_RAT]	9	0.600662	0.462119	1.08365	0.588885	0.799792	1.04861	1.09647	1.14986	0.683828	1.02368	0.012539
Q64565	Alanine--glyoxylate aminotransferase 2, mitochondrial OS=Rattus norvegicus OX=10116 GN=Agxt2 PE=1 SV=2 - [AGT2_RAT]	17	1.15016	0.592452	0.813802	0.173265	0.0349293	0.187809	0.164297	0.191585	0.682421	0.144655	0.044963
A0A140TAB8	Tyrosine-protein kinase receptor OS=Rattus norvegicus OX=10116 GN=Igf1r PE=3 SV=1 - [A0A140TAB8_RAT]	3	0.303939	0.679595	1.09511	0.645006	0.485217	0.662923	0.921087	0.72358	0.680912	0.698202	0.022863
Q5RK27	Solute carrier family 12 member 7 OS=Rattus norvegicus OX=10116 GN=Slc12a7 PE=2 SV=2 - [S12A7_RAT]	3	0.478579	0.44603	0.588914	1.20612	0.715752	0.68668	0.734964	0.904133	0.679911	0.760382	0.029489
F1LW61	Hypothetical protein LOC691189 OS=Rattus norvegicus OX=10116 GN=LOC691189 PE=4 SV=3 - [F1LW61_RAT]	2	0.719965	0.643346	0.841702	0.512733	0.72642	1.0344	1.03229	1.01789	0.679437	0.952748	0.001157
D3Z8W0	Polyamine oxidase OS=Rattus norvegicus OX=10116 GN=Paox PE=1 SV=1 - [D3Z8W0_RAT]	6	0.835149	0.564642	0.839592	0.477192	0.000892251	0.00989805	-0.0489277	0.0336479	0.679144	-0.00112238	0.0035
Q6P6S4	Nucleotide exchange factor SIL1 OS=Rattus norvegicus OX=10116 GN=Sil1 PE=2 SV=1 - [SIL1_RAT]	6	0.755379	0.612543	0.579506	0.765091	0.530139	0.452194	0.441508	0.530201	0.67813	0.48851	0.000348
F1LUW0	Uncharacterized protein OS=Rattus norvegicus OX=10116 PE=4 SV=2 - [F1LUW0_RAT]	2	0.54619	0.940849	0.679721	0.525398	0.7362	0.744235	0.673162	0.837933	0.67304	0.747882	0.003677
Q0H8B9	C-type lectin domain family 2 member D11 OS=Rattus norvegicus OX=10116 GN=Clec2d11 PE=1 SV=1 - [CL2DB_RAT]	7	0.662128	0.479405	0.882954	0.662737	0.414306	0.41552	0.438618	0.37811	0.671806	0.411639	0.002181
D4A1W8	Microsomal triglyceride transfer protein OS=Rattus norvegicus OX=10116 GN=Mttp PE=1 SV=1 - [D4A1W8_RAT]	34	0.5178	0.948818	0.775284	0.444597	0.375055	0.393613	0.433227	0.314306	0.671625	0.37905	0.008039
G3V8P3	Cadherin EGF LAG seven-pass G-type receptor 2 OS=Rattus norvegicus OX=10116 GN=Celsr2 PE=1 SV=1 - [G3V8P3_RAT]	2	0.68421	0.648654	0.827921	0.512649	0.305317	-0.25222	-0.150425	0.222404	0.668358	0.0312693	0.000992
D3ZTJ0	Protein XRP2 OS=Rattus norvegicus OX=10116 GN=Rp2 PE=1 SV=3 - [D3ZTJ0_RAT]	4	0.594666	0.479145	0.956078	0.634113	0.769097	0.944798	0.828458	0.871875	0.666	0.853557	0.005312
Q62967	Diphosphomevalonate decarboxylase OS=Rattus norvegicus OX=10116 GN=Mvd PE=1 SV=1 - [MVD1_RAT]	7	0.953304	0.557805	0.440469	0.711028	0.185265	-0.167673	-0.0749223	-0.117573	0.665651	-0.0437259	0.00659
Q794F9	4F2 cell-surface antigen heavy chain OS=Rattus norvegicus OX=10116 GN=Slc3a2 PE=1 SV=1 - [4F2_RAT]	9	0.715492	0.422691	0.824388	0.674481	0.500373	0.555701	0.534745	0.602518	0.659263	0.548334	0.002736
F7FF45	Nuclear mitotic apparatus protein 1 OS=Rattus norvegicus OX=10116 GN=Numa1 PE=1 SV=2 - [F7FF45_RAT]	3	0.401569	0.656485	0.757191	0.815936	0.975672	0.86472	1.06855	1.1227	0.657795	1.00791	0.003745
B5DEM3	Tmed4 protein OS=Rattus norvegicus OX=10116 GN=Tmed4 PE=2 SV=1 - [B5DEM3_RAT]	4	0.952986	0.781095	0.690625	0.196998	0.282792	0.618072	0.56957	0.466263	0.655426	0.484174	0.024643
Q9R066	Coxsackievirus and adenovirus receptor homolog OS=Rattus norvegicus OX=10116 GN=Cxadr PE=1 SV=2 - [CXAR_RAT]	11	0.65004	0.533611	0.746365	0.646214	0.532291	0.523223	0.540796	0.570297	0.644057	0.541652	0.000318
Q5M862	Coiled-coil domain-containing protein 134 OS=Rattus norvegicus OX=10116 GN=Ccdc134 PE=2 SV=1 - [CC134_RAT]	4	0.491032	0.735551	0.798171	0.550885	0.164329	0.222468	0.273825	0.320461	0.64391	0.245271	0.001731
D4A6R4	Hypothetical protein LOC100362216 OS=Rattus norvegicus OX=10116 GN=LOC100362216 PE=1 SV=1 - [D4A6R4_RAT]	4	0.776104	0.562977	0.693764	0.538363	-0.241407	0.0497329	0.582475	0.542936	0.642802	0.233434	0.000653
P11598	Protein disulfide-isomerase A3 OS=Rattus norvegicus OX=10116 GN=Pdia3 PE=1 SV=2 - [PDIA3_RAT]	45	0.625517	0.561861	0.566273	0.809315	0.472647	0.252099	0.265372	0.279694	0.640741	0.317453	0.000716
O88775	Embigin OS=Rattus norvegicus OX=10116 GN=Emb PE=1 SV=1 - [EMB_RAT]	7	1.07775	0.133098	0.558614	0.792177	0.39455	0.241847	0.38933	0.345485	0.64041	0.342803	0.049758
A0A0G2JVK4	Neurolysin, mitochondrial OS=Rattus norvegicus OX=10116 GN=Nln PE=1 SV=1 - [A0A0G2JVK4_RAT]	15	0.798195	0.488772	0.795104	0.471837	0.377127	0.477766	0.582838	0.493667	0.638477	0.482849	0.004159
Q68FQ6	Similar to RIKEN cDNA 1700011A15 OS=Rattus norvegicus OX=10116 GN=RGD1305207 PE=2 SV=1 - [Q68FQ6_RAT]	2	0.789277	0.123343	0.772351	0.868808	0.92535	1.29474	1.4593	1.36254	0.638445	1.26048	0.033442
P68255	14-3-3 protein theta OS=Rattus norvegicus OX=10116 GN=Ywhaq PE=1 SV=1 - [1433T_RAT]	11	0.976088	0.51879	0.403603	0.64477	0.558434	0.472518	0.459005	0.466773	0.635813	0.489182	0.011892
Q6GT74	Basigin, isoform CRA_b OS=Rattus norvegicus OX=10116 GN=Bsg PE=2 SV=1 - [Q6GT74_RAT]	11	0.695882	0.431181	0.794502	0.615328	0.352969	0.371243	0.43298	0.446915	0.634223	0.401027	0.00208
P0C0K5	Hepatitis A virus cellular receptor 2 homolog OS=Rattus norvegicus OX=10116 GN=Havcr2 PE=2 SV=2 - [HAVR2_RAT]	2	0.963171	0.404233	0.403264	0.75998	0.354745	0.0457759	-0.00909957	0.345697	0.632662	0.184279	0.017539
A0A096MK61	Cartilage-associated protein-like 1 OS=Rattus norvegicus OX=10116 GN=Crtapl1 PE=1 SV=1 - [A0A096MK61_RAT]	7	0.701645	0.602564	0.85008	0.37285	0.759033	0.967621	0.886375	0.965964	0.631785	0.894748	0.005891
D3ZE73	Structural maintenance of chromosomes protein OS=Rattus norvegicus OX=10116 GN=Smc1b PE=1 SV=1 - [D3ZE73_RAT]	2	0.808507	0.844308	0.454609	0.41518	0.138203	-0.144266	-0.333697	-0.0048271	0.630651	-0.0861468	0.008762
Q9WVT0	Adhesion G protein-coupled receptor F5 OS=Rattus norvegicus OX=10116 GN=Adgrf5 PE=1 SV=1 - [AGRF5_RAT]	5	0.987386	0.626599	0.390116	0.508297	0.291809	0.269437	0.0278177	0.12453	0.628099	0.178398	0.013931
Q9R010	Calcium and integrin-binding protein 1 OS=Rattus norvegicus OX=10116 GN=Cib1 PE=1 SV=3 - [CIB1_RAT]	3	0.752537	0.26437	0.715646	0.772048	0.466669	0.533501	0.484738	0.374833	0.626151	0.464935	0.011542
P22734	Catechol O-methyltransferase OS=Rattus norvegicus OX=10116 GN=Comt PE=1 SV=2 - [COMT_RAT]	9	0.814623	0.658275	0.762821	0.261641	-0.251374	-0.400008	-0.312357	-0.28612	0.62434	-0.312465	0.012622
A0A0H2UHC8	Ubiquitin-like domain-containing CTD phosphatase 1 OS=Rattus norvegicus OX=10116 GN=Ublcp1 PE=1 SV=1 - [A0A0H2UHC8_RAT]	3	0.4703	0.619631	0.62802	0.776975	0.497787	-0.649421	-0.053996	0.477914	0.623732	0.0680711	0.001119
D3ZMI6	Olfactomedin 4 OS=Rattus norvegicus OX=10116 GN=Olfm4 PE=4 SV=1 - [D3ZMI6_RAT]	13	0.864385	0.109087	0.880145	0.638346	0.666682	0.910152	0.868969	0.763124	0.622991	0.802232	0.039703
P52555	Endoplasmic reticulum resident protein 29 OS=Rattus norvegicus OX=10116 GN=Erp29 PE=1 SV=2 - [ERP29_RAT]	11	0.657629	0.665576	0.424405	0.737241	0.220048	-0.090092	-0.060705	-0.135529	0.621213	-0.0165694	0.001582
M0R5J4	Uncharacterized protein OS=Rattus norvegicus OX=10116 PE=3 SV=1 - [M0R5J4_RAT]	24	0.953928	0.583849	0.463175	0.477909	0.058727	-0.105742	-0.16206	-0.143941	0.619715	-0.088254	0.009602
Q6XDA0	Spectrin beta chain OS=Rattus norvegicus OX=10116 GN=Sptb PE=1 SV=1 - [Q6XDA0_RAT]	38	0.75402	0.524316	0.702539	0.494045	0.506315	0.584885	0.555444	0.454723	0.61873	0.525342	0.001281
Q62931	Golgi SNAP receptor complex member 1 OS=Rattus norvegicus OX=10116 GN=Gosr1 PE=1 SV=1 - [GOSR1_RAT]	7	0.742147	0.606695	0.642572	0.480557	0.551375	0.65429	0.708024	0.606854	0.617993	0.630136	0.000629
D3Z8M3	KH and NYN domain-containing OS=Rattus norvegicus OX=10116 GN=Khnyn PE=1 SV=1 - [D3Z8M3_RAT]	2	0.876324	0.40812	0.593095	0.58413	0.55484	0.701755	0.839249	0.891332	0.615417	0.746794	0.00573
A0A0G2KBA2	Glypican-3 OS=Rattus norvegicus OX=10116 GN=Gpc3 PE=3 SV=1 - [A0A0G2KBA2_RAT]	4	0.697865	0.174288	0.557263	1.0301	0.631355	0.431657	0.487017	0.420162	0.61488	0.492548	0.040146
Q63707	Dihydroorotate dehydrogenase (quinone), mitochondrial OS=Rattus norvegicus OX=10116 GN=Dhodh PE=1 SV=1 - [PYRD_RAT]	14	0.699492	0.57086	0.846873	0.338207	0.141544	0.259751	0.223398	0.337847	0.613858	0.240635	0.008173
M0R6J0	39S ribosomal protein L39, mitochondrial OS=Rattus norvegicus OX=10116 GN=Mrpl39 PE=1 SV=2 - [M0R6J0_RAT]	8	0.710736	0.757252	0.475107	0.510786	0.301307	0.115545	0.131184	0.142546	0.61347	0.172645	0.001689
Q32KJ6	N-acetylgalactosamine-6-sulfatase OS=Rattus norvegicus OX=10116 GN=Galns PE=1 SV=1 - [GALNS_RAT]	8	1.10181	0.30009	0.534875	0.513616	0.57017	0.767487	0.791926	0.663893	0.612599	0.698369	0.036989
D3ZJH9	Malic enzyme OS=Rattus norvegicus OX=10116 GN=Me2 PE=1 SV=1 - [D3ZJH9_RAT]	15	0.685679	0.274212	0.939406	0.547717	0.695714	0.879069	0.86725	0.831934	0.611753	0.818491	0.019531
A0A0G2K5P1	Hepatocyte nuclear factor 4-alpha OS=Rattus norvegicus OX=10116 GN=Hnf4a PE=1 SV=1 - [A0A0G2K5P1_RAT]	2	0.949638	0.227398	0.781102	0.478317	0.742584	0.769052	0.760595	0.770306	0.609114	0.760634	0.02963
Q641Z8	Peflin OS=Rattus norvegicus OX=10116 GN=Pef1 PE=2 SV=1 - [PEF1_RAT]	3	0.911606	0.181193	0.781816	0.559574	0.389794	0.715813	0.556848	0.640362	0.608547	0.575704	0.030003
D3ZDS2	Macrophage scavenger receptor 1 OS=Rattus norvegicus OX=10116 GN=Msr1 PE=1 SV=3 - [D3ZDS2_RAT]	9	0.852049	0.341268	0.919156	0.316896	0.229987	0.288708	0.368381	0.42254	0.607342	0.327404	0.030706
G3V9P3	Platelet receptor Gi24 OS=Rattus norvegicus OX=10116 GN=Vsir PE=1 SV=2 - [G3V9P3_RAT]	3	0.594734	0.434566	0.899567	0.494425	0.767719	0.809803	0.803145	1.07013	0.605823	0.862699	0.007829
Q4G069	Regulator of microtubule dynamics protein 1 OS=Rattus norvegicus OX=10116 GN=Rmdn1 PE=2 SV=1 - [RMD1_RAT]	6	0.636919	0.646068	0.595681	0.53452	0.293094	0.283288	0.219632	0.290762	0.603297	0.271694	8.1e-05
A0A0G2KAL6	Colony-stimulating factor 2 receptor alpha subunit OS=Rattus norvegicus OX=10116 GN=Csf2ra PE=1 SV=1 - [A0A0G2KAL6_RAT]	7	0.613314	0.303514	1.02084	0.462193	0.44899	0.822942	0.816131	0.764637	0.599966	0.713175	0.028659
F1MA10	NAD(P)(+)--arginine ADP-ribosyltransferase OS=Rattus norvegicus OX=10116 GN=Art4 PE=1 SV=2 - [F1MA10_RAT]	4	0.672553	0.313932	0.948963	0.455059	0.395979	0.550535	0.531218	0.449009	0.597627	0.481685	0.02062
Q6IRF8	ATPase, H+ transporting, lysosomal accessory protein 1 OS=Rattus norvegicus OX=10116 GN=Atp6ap1 PE=1 SV=1 - [Q6IRF8_RAT]	4	0.612564	0.48126	0.859316	0.436764	0.395334	0.697184	0.735513	0.4746	0.597476	0.575658	0.00573
Q5M878	Serum amyloid A protein OS=Rattus norvegicus OX=10116 GN=Saa4 PE=1 SV=1 - [Q5M878_RAT]	4	0.437045	0.784686	0.612485	0.554167	0.421493	0.235979	0.162232	0.419208	0.597096	0.309728	0.002006
Q5I0H3	Small ubiquitin-related modifier 1 OS=Rattus norvegicus OX=10116 GN=Sumo1 PE=1 SV=1 - [SUMO1_RAT]	2	0.738865	0.678329	0.508682	0.461439	0.510124	0.43373	0.231354	0.273684	0.596829	0.362223	0.001582
D3ZZ37	Mitochondrial assembly of ribosomal large subunit 1 OS=Rattus norvegicus OX=10116 GN=Malsu1 PE=3 SV=1 - [D3ZZ37_RAT]	3	0.712128	0.785622	0.214899	0.664814	0.601052	-0.0231648	0.432082	0.0483393	0.594366	0.264577	0.017346
A0A0G2JTA0	FAS-associated factor 2 OS=Rattus norvegicus OX=10116 GN=Faf2 PE=1 SV=1 - [A0A0G2JTA0_RAT]	7	0.447351	0.7508	0.621968	0.54516	0.261257	0.151307	-0.0613989	0.160251	0.59132	0.127854	0.00134
Q9WVA1	Mitochondrial import inner membrane translocase subunit Tim8 A OS=Rattus norvegicus OX=10116 GN=Timm8a PE=1 SV=1 - [TIM8A_RAT]	5	0.646276	0.719396	0.451123	0.546754	0.238936	-0.0408462	-0.0740556	-0.134235	0.590887	-0.00255017	0.001036
A0A1B0GWT7	Late endosomal/lysosomal adaptor, MAPK and MTOR activator 2 OS=Rattus norvegicus OX=10116 GN=Lamtor2 PE=1 SV=1 - [A0A1B0GWT7_RAT]	2	0.423118	0.311423	0.955922	0.665546	0.434732	0.335779	0.331242	0.289976	0.589002	0.347932	0.024464
Q63085	cGMP-inhibited 3',5'-cyclic phosphodiesterase B OS=Rattus norvegicus OX=10116 GN=Pde3b PE=2 SV=1 - [PDE3B_RAT]	4	0.302611	0.81696	0.68424	0.5509	0.2872	0.0556117	0.149656	-0.113672	0.588678	0.094699	0.010207
G3V9W9	FAT atypical cadherin 1 OS=Rattus norvegicus OX=10116 GN=Fat1 PE=1 SV=1 - [G3V9W9_RAT]	7	0.49344	0.623992	0.610099	0.619073	0.296251	0.106747	0.101297	0.311561	0.586651	0.203964	0.000147
Q9R175	Interferon-induced transmembrane protein 2 OS=Rattus norvegicus OX=10116 GN=Ifitm2 PE=1 SV=1 - [Q9R175_RAT]	2	0.413629	0.47767	0.802356	0.650429	0.615794	0.731509	0.866972	0.665325	0.586021	0.7199	0.004672
P97523	Hepatocyte growth factor receptor OS=Rattus norvegicus OX=10116 GN=Met PE=1 SV=1 - [MET_RAT]	3	1.00205	0.510194	0.503576	0.324585	0.229803	0.415236	0.409692	0.437695	0.5851	0.373106	0.026172
B0BNB1	Commd1 protein OS=Rattus norvegicus OX=10116 GN=Commd1 PE=1 SV=1 - [B0BNB1_RAT]	2	0.805476	0.518534	0.427175	0.582266	0.43268	0.460323	0.639171	0.732403	0.583363	0.566144	0.00355
D4A249	Metallo-beta-lactamase domain-containing 2 OS=Rattus norvegicus OX=10116 GN=Mblac2 PE=1 SV=1 - [D4A249_RAT]	4	0.566835	0.315752	0.523734	0.904797	0.522908	-0.0531326	-0.0190689	-0.010149	0.577779	0.110139	0.014551
D3ZZR9	Peptidylprolyl isomerase OS=Rattus norvegicus OX=10116 GN=Fkbp2 PE=1 SV=1 - [D3ZZR9_RAT]	5	0.74977	0.548641	0.482448	0.526931	-0.174015	-0.431719	-0.358759	-0.331934	0.576947	-0.324107	0.001178
Q5M9G1	Protein HEXIM1 OS=Rattus norvegicus OX=10116 GN=Hexim1 PE=1 SV=1 - [HEXI1_RAT]	5	-0.457005	-0.554877	-0.731866	-0.558828	-0.717163	-0.635456	-0.544369	-0.505046	-0.575644	-0.600508	0.000986
Q5FWS5	Lysyl oxidase-like 1 OS=Rattus norvegicus OX=10116 GN=Loxl1 PE=2 SV=1 - [Q5FWS5_RAT]	4	-0.762605	-0.551311	-0.468748	-0.540467	-0.437868	-0.174614	-0.0916689	-0.190657	-0.580783	-0.223702	0.001405
C9DRP4	6-phosphofructo-2-kinase/fructose-2, 6-bisphosphatase 1 variant OS=Rattus norvegicus OX=10116 GN=pfkfb1 PE=2 SV=1 - [C9DRP4_RAT]	10	-0.60701	-0.359783	-0.596034	-0.761292	-0.557776	-0.389529	-0.30609	-0.259831	-0.58103	-0.378306	0.003884
B1H269	DEAD-box helicase 27 OS=Rattus norvegicus OX=10116 GN=Ddx27 PE=1 SV=1 - [B1H269_RAT]	6	-0.653491	-0.694079	-0.563822	-0.416646	-0.124728	-0.0773309	-0.189443	-0.178529	-0.582009	-0.142508	0.001191
A8QIC3	DnaJ (Hsp40) homolog, subfamily C, member 9 (Predicted) OS=Rattus norvegicus OX=10116 GN=Dnajc9 PE=1 SV=1 - [A8QIC3_RAT]	6	-0.870378	-0.685432	-0.634275	-0.140192	-0.383489	-0.531092	-0.642211	-0.627266	-0.582569	-0.546015	0.03179
Q5XI67	F-box only protein 30 OS=Rattus norvegicus OX=10116 GN=Fbxo30 PE=1 SV=1 - [FBX30_RAT]	2	-0.164725	-0.668471	-0.978208	-0.52351	-0.294765	-0.425829	-0.420924	-0.53003	-0.583728	-0.417887	0.041329
A0A0G2JXM2	Cyclin-T1-like OS=Rattus norvegicus OX=10116 GN=LOC103692976 PE=4 SV=1 - [A0A0G2JXM2_RAT]	4	-0.40113	-0.443364	-0.861732	-0.635043	-0.786392	-1.06945	-0.684159	-1.07148	-0.585317	-0.902871	0.008973
P13941	Collagen alpha-1(III) chain OS=Rattus norvegicus OX=10116 GN=Col3a1 PE=2 SV=3 - [CO3A1_RAT]	38	-0.715146	-0.757842	-0.45149	-0.42623	-0.221834	-0.0684589	-0.0928241	-0.152234	-0.587677	-0.133838	0.004452
D3ZZT9	Collagen type XIV alpha 1 chain OS=Rattus norvegicus OX=10116 GN=Col14a1 PE=1 SV=3 - [D3ZZT9_RAT]	52	-0.91072	-0.613461	-0.376276	-0.460886	-0.103023	0.145	0.152042	0.155495	-0.590336	0.0873787	0.012125
A0JPM9	Eukaryotic translation initiation factor 3 subunit J OS=Rattus norvegicus OX=10116 GN=Eif3j PE=1 SV=1 - [EIF3J_RAT]	8	-0.622117	-0.559389	-0.6533	-0.536368	-0.69292	-0.860519	-0.809891	-0.820818	-0.592793	-0.796037	6.6e-05
A0A1B0GWS3	Cytoplasmic linker-associated protein 1 (Fragment) OS=Rattus norvegicus OX=10116 GN=Clasp1 PE=1 SV=1 - [A0A1B0GWS3_RAT]	2	-0.927137	-0.784589	-0.365603	-0.306386	-0.665275	-0.626755	-0.531233	-0.273086	-0.595929	-0.524087	0.02759
A0A0G2JW51	Putative ATP-dependent RNA helicase DHX30 OS=Rattus norvegicus OX=10116 GN=Dhx30 PE=1 SV=1 - [A0A0G2JW51_RAT]	3	-0.649129	-0.275736	-0.901221	-0.562508	-0.148831	-0.0686772	-0.12918	-0.0734617	-0.597149	-0.105037	0.015885
Q3KR94	Vitronectin OS=Rattus norvegicus OX=10116 GN=Vtn PE=1 SV=1 - [Q3KR94_RAT]	8	-0.511944	-0.605583	-0.595756	-0.676684	-0.485055	-0.282939	-0.397667	-0.304777	-0.597492	-0.36761	0.000175
Q6P7Q2	Glypican-1 OS=Rattus norvegicus OX=10116 GN=Gpc1 PE=2 SV=1 - [Q6P7Q2_RAT]	2	-0.9344	-0.354164	-0.46434	-0.652976	-0.198509	-0.121994	-0.198191	-0.157566	-0.60147	-0.169065	0.015464
P60825	Cold-inducible RNA-binding protein OS=Rattus norvegicus OX=10116 GN=Cirbp PE=2 SV=1 - [CIRBP_RAT]	5	-0.555935	-0.581152	-0.962826	-0.32867	-0.640972	-0.751648	-0.99357	-0.842303	-0.607146	-0.807123	0.016021
E9PSZ7	Cytochrome P450, family 2, subfamily t, polypeptide 1 OS=Rattus norvegicus OX=10116 GN=Cyp2t1 PE=1 SV=1 - [E9PSZ7_RAT]	3	-0.860165	-0.276249	-0.330741	-0.965128	-0.660933	-0.294234	-0.25763	-0.321913	-0.608071	-0.383677	0.040873
Q4V8H8	EH domain-containing protein 2 OS=Rattus norvegicus OX=10116 GN=Ehd2 PE=1 SV=1 - [EHD2_RAT]	10	-0.692226	-0.445726	-0.415307	-0.881576	-0.403975	0.113026	0.0858003	0.0672136	-0.608709	-0.0344838	0.00855
P62845	40S ribosomal protein S15 OS=Rattus norvegicus OX=10116 GN=Rps15 PE=1 SV=2 - [RS15_RAT]	5	-0.843554	-0.266165	-0.507594	-0.818893	-0.639064	-0.380924	-0.419909	-0.501093	-0.609052	-0.485248	0.018253
F1M9A7	Acyl-coenzyme A oxidase OS=Rattus norvegicus OX=10116 GN=Acox3 PE=1 SV=2 - [F1M9A7_RAT]	13	-0.650676	-0.515791	-0.48802	-0.785695	-0.666529	-0.535573	-0.577807	-0.631312	-0.610046	-0.602805	0.001582
Q5U2U7	mRNA cap guanine-N7 methyltransferase OS=Rattus norvegicus OX=10116 GN=Rnmt PE=1 SV=1 - [MCES_RAT]	3	-0.48513	-0.478419	-0.599892	-0.881399	-0.818077	-0.645362	-0.715281	-0.560742	-0.61121	-0.684866	0.004952
Q5BJT0	Arginine and glutamate-rich protein 1 OS=Rattus norvegicus OX=10116 GN=Arglu1 PE=1 SV=1 - [ARGL1_RAT]	5	-0.844759	-0.736632	-0.656363	-0.210044	-0.205039	-0.230386	-0.229337	-0.226275	-0.61195	-0.222759	0.019275
G3V9M6	Fibrillin 1 OS=Rattus norvegicus OX=10116 GN=Fbn1 PE=1 SV=1 - [G3V9M6_RAT]	50	-0.786152	-0.772909	-0.342974	-0.550377	-0.188642	0.0572632	-0.00739259	-0.0267724	-0.613103	-0.0413859	0.007733
P63255	Cysteine-rich protein 1 OS=Rattus norvegicus OX=10116 GN=Crip1 PE=1 SV=2 - [CRIP1_RAT]	3	-0.631244	-0.419391	-0.914821	-0.490194	-0.26308	-0.278876	-0.429635	-0.669761	-0.613913	-0.410338	0.008393
F1LYK3	Neuron navigator 1 OS=Rattus norvegicus OX=10116 GN=Nav1 PE=1 SV=2 - [F1LYK3_RAT]	3	-0.964953	-0.479611	-0.613184	-0.399359	-0.470143	-0.615836	-0.663448	-0.528248	-0.614277	-0.569419	0.01294
K9N0M9	CDK5 regulatory subunit associated protein 1-like 1 OS=Rattus norvegicus OX=10116 GN=CDKAL1 PE=2 SV=1 - [K9N0M9_RAT]	2	-0.921805	-0.377196	-0.545793	-0.61325	-0.35788	-0.678654	-0.502137	-0.646556	-0.614511	-0.546307	0.009464
P04638	Apolipoprotein A-II OS=Rattus norvegicus OX=10116 GN=Apoa2 PE=2 SV=1 - [APOA2_RAT]	2	-0.601412	-0.921702	-0.565602	-0.369893	-0.320456	-0.293707	-0.37652	-0.368944	-0.614652	-0.339907	0.009643
P11762	Galectin-1 OS=Rattus norvegicus OX=10116 GN=Lgals1 PE=1 SV=2 - [LEG1_RAT]	9	-0.97529	-0.444338	-0.445751	-0.593793	-0.309998	-0.198745	-0.219012	-0.178888	-0.614793	-0.226661	0.013889
Q5XIP6	Flap endonuclease 1 OS=Rattus norvegicus OX=10116 GN=Fen1 PE=2 SV=1 - [FEN1_RAT]	3	-0.747355	-0.727934	-0.722756	-0.265192	-0.447162	-0.599058	-0.629974	-0.835673	-0.615809	-0.627967	0.010143
A0A0G2K0P0	A-kinase-anchoring protein 8-like OS=Rattus norvegicus OX=10116 GN=Akap8l PE=1 SV=1 - [A0A0G2K0P0_RAT]	2	-0.982202	-0.477771	-0.429869	-0.58311	-0.167331	0.0267922	-0.110929	0.130686	-0.618238	-0.0301954	0.012995
O35849	Lecithin cholesterol acyltransferase OS=Rattus norvegicus OX=10116 GN=Lcat PE=1 SV=1 - [O35849_RAT]	4	-0.482895	-1.01106	-0.609088	-0.370196	-0.561265	-0.758147	-0.885158	-0.7481	-0.618311	-0.738167	0.019048
B2GUV5	V-type proton ATPase subunit G OS=Rattus norvegicus OX=10116 GN=Atp6v1g1 PE=1 SV=1 - [B2GUV5_RAT]	2	-0.83786	-0.798654	-0.572834	-0.2647	-0.727063	-1.32591	-1.27802	-1.08242	-0.618512	-1.10335	0.016227
A0A0G2JUA5	AHNAK nucleoprotein OS=Rattus norvegicus OX=10116 GN=Ahnak PE=1 SV=1 - [A0A0G2JUA5_RAT]	187	-0.845807	-0.643473	-0.464602	-0.523076	-0.422574	-0.342113	-0.377625	-0.344441	-0.61924	-0.371688	0.003629
D3ZIL9	DIS3-like exonuclease 2 OS=Rattus norvegicus OX=10116 GN=Dis3l2 PE=1 SV=2 - [D3ZIL9_RAT]	3	-0.676976	-0.630902	-0.765058	-0.404179	-0.714303	-0.943976	-0.982344	-0.824707	-0.619279	-0.866333	0.00254
Q498D5	Regulator of microtubule dynamics protein 2 OS=Rattus norvegicus OX=10116 GN=Rmdn2 PE=1 SV=1 - [RMD2_RAT]	3	-0.670382	-0.459245	-0.543732	-0.804468	-0.816326	-0.561646	-0.706805	-0.583506	-0.619457	-0.667071	0.002084
M0RC57	Small ArfGAP 1 OS=Rattus norvegicus OX=10116 GN=Smap1 PE=1 SV=1 - [M0RC57_RAT]	3	-0.598838	-0.540104	-1.02585	-0.314425	-0.265992	-0.499421	-0.425882	-0.555268	-0.619804	-0.436641	0.023633
P09811	Glycogen phosphorylase, liver form OS=Rattus norvegicus OX=10116 GN=Pygl PE=1 SV=5 - [PYGL_RAT]	24	-0.269825	-0.385965	-0.712398	-1.11538	-0.897548	-0.747518	-0.805821	-0.667896	-0.620893	-0.779696	0.046411
Q62969	Prostacyclin synthase OS=Rattus norvegicus OX=10116 GN=Ptgis PE=2 SV=1 - [PTGIS_RAT]	11	-0.651591	-0.631123	-0.357506	-0.853901	0.10175	0.649551	0.567224	0.552594	-0.62353	0.46778	0.006098
F1LXS3	Matrilin 2 OS=Rattus norvegicus OX=10116 GN=Matn2 PE=4 SV=3 - [F1LXS3_RAT]	3	-0.582814	-0.654331	-0.614525	-0.655794	-0.29634	-0.238147	-0.187765	-0.17142	-0.626866	-0.223418	2.5e-05
Q8K4C0	Dimethylaniline monooxygenase [N-oxide-forming] 5 OS=Rattus norvegicus OX=10116 GN=Fmo5 PE=1 SV=3 - [FMO5_RAT]	7	-0.913131	-0.350033	-0.459424	-0.786437	-0.461397	-0.339248	-0.406569	-0.312999	-0.627256	-0.380053	0.015153
D4A5F4	Hypothetical LOC289568 OS=Rattus norvegicus OX=10116 GN=RGD1311575 PE=1 SV=3 - [D4A5F4_RAT]	3	-0.622642	-0.608239	-0.390264	-0.894797	-0.519163	-0.854409	-0.802851	-1.39262	-0.628985	-0.892261	0.006246
Q501L3	Myb/SANT-like DNA-binding domain-containing protein 4 OS=Rattus norvegicus OX=10116 GN=Msantd4 PE=1 SV=1 - [MSD4_RAT]	3	-0.526229	-1.08323	-0.651963	-0.266504	-0.535081	-0.503917	-0.542451	-0.406422	-0.63198	-0.496968	0.03154
P02651	Apolipoprotein A-IV OS=Rattus norvegicus OX=10116 GN=Apoa4 PE=1 SV=2 - [APOA4_RAT]	22	-0.577963	-0.741163	-0.5892	-0.619721	-0.635344	-0.482983	-0.463528	-0.49601	-0.632012	-0.519466	0.000175
Q66H65	NEDD4-binding protein 2-like 2 OS=Rattus norvegicus OX=10116 GN=N4bp2l2 PE=2 SV=1 - [N42L2_RAT]	2	-0.707673	-1.03457	-0.563916	-0.224029	-0.0555778	0.10441	-0.0122646	-0.0764698	-0.632547	-0.00997556	0.031484
Q9JHY2	Sideroflexin-3 OS=Rattus norvegicus OX=10116 GN=Sfxn3 PE=2 SV=1 - [SFXN3_RAT]	4	-0.982887	-0.557365	-0.367345	-0.648749	-0.415833	-0.130529	-0.10029	0.0234772	-0.639086	-0.155794	0.012408
P29314	40S ribosomal protein S9 OS=Rattus norvegicus OX=10116 GN=Rps9 PE=1 SV=4 - [RS9_RAT]	13	-0.862946	-0.105019	-0.660599	-0.942402	-0.704213	-0.544734	-0.570311	-0.515237	-0.642741	-0.583624	0.040786
Q9ES75	Proline-rich acidic protein 1 OS=Rattus norvegicus OX=10116 GN=Prap1 PE=2 SV=1 - [PRAP1_RAT]	2	-0.300491	-0.804398	-0.618734	-0.853811	-0.752342	-0.616684	-0.707157	-0.642345	-0.644359	-0.679632	0.011216
P01039	Cystatin-A OS=Rattus norvegicus OX=10116 GN=Csta PE=1 SV=1 - [CYTA_RAT]	2	-0.225675	-0.934918	-0.882058	-0.535034	-0.491296	-0.509447	-0.541706	-0.413292	-0.644421	-0.488935	0.027039
D3ZCT7	Sec23 homolog B, coat complex II component OS=Rattus norvegicus OX=10116 GN=Sec23b PE=1 SV=2 - [D3ZCT7_RAT]	11	-0.72266	-0.559023	-0.503725	-0.810803	-0.444538	-0.0461361	-0.0531559	0.0649204	-0.649052	-0.119728	0.001494
Q5XIF3	NADH dehydrogenase [ubiquinone] iron-sulfur protein 4, mitochondrial OS=Rattus norvegicus OX=10116 GN=Ndufs4 PE=1 SV=1 - [NDUS4_RAT]	8	-0.796564	-0.551073	-0.705542	-0.545123	-0.88168	-1.12317	-0.993364	-1.16875	-0.649576	-1.04174	0.000852
F1LUV9	Neural cell adhesion molecule 1 OS=Rattus norvegicus OX=10116 GN=Ncam1 PE=1 SV=3 - [F1LUV9_RAT]	5	-0.957263	-0.459531	-0.465847	-0.719049	-0.192563	0.0274898	0.126148	0.160111	-0.650422	0.0302963	0.009245
Q3MHS2	Zinc finger protein 830 OS=Rattus norvegicus OX=10116 GN=Znf830 PE=1 SV=1 - [ZN830_RAT]	6	-0.59116	-0.436313	-1.14019	-0.436339	-0.469425	-0.518424	-0.664294	-0.502768	-0.651	-0.538728	0.02759
P70470	Acyl-protein thioesterase 1 OS=Rattus norvegicus OX=10116 GN=Lypla1 PE=1 SV=1 - [LYPA1_RAT]	2	-0.299362	-0.861347	-0.694156	-0.765912	-0.44728	-0.207819	-0.161349	-0.113136	-0.655194	-0.232396	0.010214
Q7TS56	Carbonyl reductase family member 4 OS=Rattus norvegicus OX=10116 GN=Cbr4 PE=2 SV=1 - [CBR4_RAT]	4	-0.607351	-0.376577	-0.62591	-1.01624	-0.855512	-0.617216	-0.501428	-0.533544	-0.656518	-0.626925	0.012733
D3ZSY4	Eosinophil peroxidase OS=Rattus norvegicus OX=10116 GN=Epx PE=1 SV=1 - [D3ZSY4_RAT]	9	-0.803818	-0.504679	-0.548932	-0.777542	-0.0782433	0.240506	0.192098	0.184836	-0.658743	0.134799	0.00189
G3V644	NADH dehydrogenase (Ubiquinone) flavoprotein 3-like, isoform CRA_a OS=Rattus norvegicus OX=10116 GN=Ndufv3 PE=1 SV=1 - [G3V644_RAT]	15	-0.706915	-0.443344	-0.921455	-0.569112	-0.565096	-0.789129	-0.72401	-0.963394	-0.660206	-0.760407	0.005335
Q6AY96	General transcription factor IIF subunit 1 OS=Rattus norvegicus OX=10116 GN=Gtf2f1 PE=1 SV=1 - [T2FA_RAT]	6	-0.666822	-0.637085	-1.02474	-0.319314	-0.76348	-0.607485	-0.531327	-0.688684	-0.66199	-0.647744	0.016301
Q3MIB4	Lon protease homolog 2, peroxisomal OS=Rattus norvegicus OX=10116 GN=Lonp2 PE=1 SV=2 - [LONP2_RAT]	9	-1.02105	-0.227404	-0.678461	-0.723937	-0.606029	-0.852733	-0.916086	-0.834217	-0.662713	-0.802266	0.024659
F1LMW7	Myristoylated alanine-rich C-kinase substrate OS=Rattus norvegicus OX=10116 GN=Marcks PE=1 SV=3 - [F1LMW7_RAT]	7	-0.945006	-0.69559	-0.657187	-0.353601	-0.566224	-0.645726	-0.693544	-0.622214	-0.662846	-0.631927	0.009649
P35745	Acylphosphatase-2 OS=Rattus norvegicus OX=10116 GN=Acyp2 PE=1 SV=2 - [ACYP2_RAT]	2	-0.740238	-0.197244	-0.581509	-1.13685	-1.42201	-1.27844	-1.14991	-1.09652	-0.663961	-1.23672	0.041411
P07335	Creatine kinase B-type OS=Rattus norvegicus OX=10116 GN=Ckb PE=1 SV=2 - [KCRB_RAT]	9	-0.609573	-0.586718	-0.686915	-0.777404	-0.618059	-0.528092	-0.591876	-0.535193	-0.665152	-0.568305	0.000229
F1LQM8	MutS homolog 3 OS=Rattus norvegicus OX=10116 GN=Msh3 PE=4 SV=2 - [F1LQM8_RAT]	2	-0.386269	-1.05347	-0.909208	-0.315805	-0.193523	-0.155366	-0.262188	-0.167782	-0.666189	-0.194715	0.034338
D3Z900	Mitochondrial amidoxime reducing component 2 OS=Rattus norvegicus OX=10116 GN=Marc2 PE=1 SV=2 - [D3Z900_RAT]	7	-0.921721	-0.139118	-0.598582	-1.02274	-0.709704	-0.397707	-0.425563	-0.482666	-0.670541	-0.50391	0.042472
P36365	Dimethylaniline monooxygenase [N-oxide-forming] 1 OS=Rattus norvegicus OX=10116 GN=Fmo1 PE=1 SV=2 - [FMO1_RAT]	13	-0.772959	-0.520378	-0.621513	-0.767319	-0.158415	0.0834976	0.133175	0.0949799	-0.670542	0.0383094	0.000754
A0A0G2JZM2	Sec23 homolog A, coat complex II component OS=Rattus norvegicus OX=10116 GN=Sec23a PE=1 SV=1 - [A0A0G2JZM2_RAT]	6	-0.607131	-0.565175	-0.556069	-0.955461	-0.438829	-0.125968	-0.198366	-0.205159	-0.670959	-0.242081	0.00387
F1LND0	Collagen type XVI alpha 1 chain OS=Rattus norvegicus OX=10116 GN=Col16a1 PE=1 SV=2 - [F1LND0_RAT]	5	-1.03309	-0.551511	-0.50719	-0.59314	-0.243508	-0.0346013	0.00488075	-0.139061	-0.671233	-0.103072	0.008999
P34926	Microtubule-associated protein 1A OS=Rattus norvegicus OX=10116 GN=Map1a PE=1 SV=1 - [MAP1A_RAT]	12	-1.23932	-0.374837	-0.477952	-0.595498	-0.580485	-0.624833	-0.659652	-0.845738	-0.671902	-0.677677	0.04029
F1MA59	Collagen type IV alpha 1 chain OS=Rattus norvegicus OX=10116 GN=Col4a1 PE=1 SV=1 - [F1MA59_RAT]	9	-0.995791	-0.672465	-0.424426	-0.600197	-0.354249	-0.0717208	-0.0252352	0.00268632	-0.67322	-0.11213	0.008928
A0A0G2JXU1	Nuclear VCP-like OS=Rattus norvegicus OX=10116 GN=Nvl PE=1 SV=1 - [A0A0G2JXU1_RAT]	2	-0.68348	-0.731184	-0.740173	-0.545914	-0.228904	-0.368078	0.0428759	-0.0132738	-0.675188	-0.141845	0.000229
A0A128DZ42	Fibronectin type III domain containing 1 protein OS=Rattus norvegicus OX=10116 GN=Fndc1 PE=2 SV=1 - [A0A128DZ42_RAT]	8	-0.862458	-0.571591	-0.536496	-0.740726	-0.337147	-0.304578	-0.333486	-0.216959	-0.677818	-0.298043	0.001532
D4A885	ATP-binding cassette subfamily A member 13 OS=Rattus norvegicus OX=10116 GN=Abca13 PE=4 SV=3 - [D4A885_RAT]	2	-0.786447	-0.743324	-0.76378	-0.428749	-0.656597	-0.213634	0	-1.81766	-0.680575	-0.671973	0.002273
Q5I0K1	Pipecolic acid and sarcosine oxidase OS=Rattus norvegicus OX=10116 GN=Pipox PE=1 SV=1 - [Q5I0K1_RAT]	4	-0.609682	-0.590063	-0.849468	-0.678869	-0.36382	-0.166975	-0.0523791	-0.0134769	-0.682021	-0.149163	0.000629
G3V7V6	All-trans-13,14-dihydroretinol saturase, isoform CRA_b OS=Rattus norvegicus OX=10116 GN=Retsat PE=1 SV=1 - [G3V7V6_RAT]	3	-0.968664	-0.558042	-0.518511	-0.698635	-1.00701	-1.07724	-1.19739	-1.1522	-0.685963	-1.10846	0.004497
P97612	Fatty-acid amide hydrolase 1 OS=Rattus norvegicus OX=10116 GN=Faah PE=1 SV=1 - [FAAH1_RAT]	7	-0.846059	-0.591615	-0.452221	-0.856243	-0.64363	-0.273562	-0.300323	-0.32251	-0.686534	-0.385006	0.004373
Q4QRB2	Pre-mRNA-splicing factor SYF2 OS=Rattus norvegicus OX=10116 GN=Syf2 PE=2 SV=1 - [SYF2_RAT]	2	-0.631798	-0.840491	-0.969966	-0.305741	-0.29858	-0.60325	-0.69724	-0.535282	-0.686999	-0.533588	0.014783
Q64361	Latexin OS=Rattus norvegicus OX=10116 GN=Lxn PE=1 SV=1 - [LXN_RAT]	2	-0.885601	-0.902016	-0.523361	-0.439146	-0.614486	-0.584684	-0.50621	-0.580044	-0.687531	-0.571356	0.008195
Q9ERB4	Versican core protein (Fragments) OS=Rattus norvegicus OX=10116 GN=Vcan PE=2 SV=2 - [CSPG2_RAT]	8	-1.04389	-0.794374	-0.438245	-0.499377	-0.280468	-0.0975727	-0.152192	-0.00485482	-0.693972	-0.133772	0.012622
P69736	Endothelial differentiation-related factor 1 OS=Rattus norvegicus OX=10116 GN=Edf1 PE=1 SV=1 - [EDF1_RAT]	4	-0.72183	-0.60568	-1.09606	-0.353611	-0.69708	-0.922717	-0.895588	-0.897875	-0.694295	-0.853315	0.018433
A0A0H2UHL3	Adipocyte enhancer-binding protein 1 OS=Rattus norvegicus OX=10116 GN=Aebp1 PE=4 SV=1 - [A0A0H2UHL3_RAT]	8	-0.728124	-0.806737	-0.52681	-0.721278	-0.251877	0.135445	0.0605207	0.121077	-0.695737	0.0162913	0.000588
O88867	Kynurenine 3-monooxygenase OS=Rattus norvegicus OX=10116 GN=Kmo PE=1 SV=1 - [KMO_RAT]	3	-0.760781	-0.31283	-0.72801	-0.988342	-0.769098	-0.553657	-0.598881	-0.490779	-0.697491	-0.603104	0.013239
Q7M0C4	Cytochrome P450 2B4 (Fragments) OS=Rattus norvegicus OX=10116 PE=4 SV=1 - [Q7M0C4_RAT]	5	-0.849816	-0.365981	-0.490905	-1.08398	-1.14507	-1.04586	-1.13492	-0.972901	-0.69767	-1.07469	0.021176
P11711	Cytochrome P450 2A1 OS=Rattus norvegicus OX=10116 GN=Cyp2a1 PE=1 SV=2 - [CP2A1_RAT]	23	-0.955087	-0.398664	-0.456926	-0.987589	-0.638088	-0.383285	-0.322706	-0.382149	-0.699566	-0.431557	0.018615
A0A0G2JV08	Polycomb protein Suz12 OS=Rattus norvegicus OX=10116 GN=Suz12 PE=1 SV=1 - [A0A0G2JV08_RAT]	4	-0.947124	-0.886623	-0.471286	-0.503384	0.075541	0.0505582	-0.168148	-0.0170902	-0.702104	-0.0147847	0.008877
Q6AYC4	Macrophage-capping protein OS=Rattus norvegicus OX=10116 GN=Capg PE=1 SV=1 - [CAPG_RAT]	2	-0.670655	-0.787022	-0.72261	-0.643425	-0.417266	-0.362899	-0.493005	-0.480139	-0.705928	-0.438327	8.7e-05
G3V7Q8	Cationic trypsinogen OS=Rattus norvegicus OX=10116 GN=Prss3b PE=3 SV=1 - [G3V7Q8_RAT]	3	-0.938799	-0.798775	-0.817215	-0.270773	-0.681992	-0.824177	-0.838518	-0.771632	-0.70639	-0.77908	0.014979
Q4KM62	Palmdelphin OS=Rattus norvegicus OX=10116 GN=Palmd PE=1 SV=1 - [PALMD_RAT]	8	-0.698579	-0.505955	-0.730315	-0.895743	-1.14792	-1.14838	-1.22431	-1.16607	-0.707648	-1.17167	0.00159
A0A0G2KAU7	Latent-transforming growth factor beta-binding protein 2 OS=Rattus norvegicus OX=10116 GN=Ltbp2 PE=1 SV=1 - [A0A0G2KAU7_RAT]	8	-0.62636	-0.819749	-0.515878	-0.870579	-0.335192	-0.0473691	-0.0407231	-0.0339755	-0.708142	-0.114315	0.001733
B2RYM3	Inter-alpha trypsin inhibitor, heavy chain 1 OS=Rattus norvegicus OX=10116 GN=Itih1 PE=1 SV=1 - [B2RYM3_RAT]	12	-0.853399	-0.830315	-0.539202	-0.628811	-0.45048	-0.409746	-0.455141	-0.408198	-0.712932	-0.430891	0.001352
Q498T3	Inhibitor of growth protein 3 OS=Rattus norvegicus OX=10116 GN=Ing3 PE=2 SV=1 - [ING3_RAT]	2	-0.41426	-0.777397	-1.15001	-0.514002	-0.404966	-0.414455	-0.55903	-0.258044	-0.713918	-0.409124	0.02062
Q2MH90	14.7K-interacting protein-2 type B variant (Fragment) OS=Rattus norvegicus OX=10116 GN=FIP-2B variant PE=2 SV=1 - [Q2MH90_RAT]	12	-0.230161	-0.53581	-1.11619	-0.982762	-0.945702	-1.02014	-1.11125	-1.13272	-0.716232	-1.05245	0.038424
F1M265	Uncharacterized protein OS=Rattus norvegicus OX=10116 PE=1 SV=3 - [F1M265_RAT]	12	-0.875321	-0.891863	-0.642001	-0.45913	-0.399895	-0.479074	-0.455713	-0.486515	-0.717079	-0.455299	0.004133
P51886	Lumican OS=Rattus norvegicus OX=10116 GN=Lum PE=1 SV=1 - [LUM_RAT]	12	-0.883903	-0.985682	-0.457478	-0.567695	-0.143245	0.126786	0.124794	0.181076	-0.72369	0.072353	0.007733
A0A096MJ77	Uncharacterized protein (Fragment) OS=Rattus norvegicus OX=10116 PE=1 SV=1 - [A0A096MJ77_RAT]	3	-0.622866	-0.953946	-0.5512	-0.767323	0	-0.193623	-0.679259	-0.501818	-0.723834	-0.343675	0.002223
Q64550	UDP-glucuronosyltransferase 1-1 OS=Rattus norvegicus OX=10116 GN=Ugt1a1 PE=1 SV=1 - [UD11_RAT]	2	-1.06197	-0.681372	-0.306901	-0.845359	-0.839636	-0.769084	-0.801749	-0.89859	-0.7239	-0.827265	0.017163
A0A0G2K9Y5	Histidine-rich glycoprotein OS=Rattus norvegicus OX=10116 GN=Hrg PE=1 SV=1 - [A0A0G2K9Y5_RAT]	10	-0.519112	-1.00784	-0.972201	-0.416142	-0.353122	-0.411724	-0.455381	-0.429423	-0.728824	-0.412412	0.014438
A0A0G2JST5	Elastin OS=Rattus norvegicus OX=10116 GN=Eln PE=1 SV=1 - [A0A0G2JST5_RAT]	3	-0.751879	-1.03584	-0.527132	-0.604277	-0.705209	-0.377204	-0.2726	-0.170329	-0.729781	-0.381335	0.005256
G3V7Z4	Glia-derived nexin OS=Rattus norvegicus OX=10116 GN=Serpine2 PE=3 SV=1 - [G3V7Z4_RAT]	2	-0.766761	-0.713093	-0.679337	-0.81812	-0.363704	0.083476	-0.108903	-0.11096	-0.744328	-0.125023	6.4e-05
D3ZIM7	Family with sequence similarity 177, member A1 OS=Rattus norvegicus OX=10116 GN=Fam177a1 PE=1 SV=1 - [D3ZIM7_RAT]	2	-0.721549	-1.08028	-0.846325	-0.354968	-0.376783	-0.402915	-0.256402	-0.262406	-0.75078	-0.324626	0.013377
B2RZD5	RCG41580, isoform CRA_a OS=Rattus norvegicus OX=10116 GN=Rpl22l1 PE=2 SV=1 - [B2RZD5_RAT]	3	-0.90861	-0.732534	-0.80253	-0.561577	-0.683934	-0.74238	-0.810959	-0.869795	-0.751313	-0.776767	0.000986
Q5BJQ7	Transcriptional adapter 1 OS=Rattus norvegicus OX=10116 GN=Tada1 PE=2 SV=2 - [TADA1_RAT]	2	-0.685659	-0.684008	-0.392406	-1.24412	-1.04747	-0.104125	-0.092321	-0.173635	-0.751549	-0.354387	0.021848
D4A5T8	Periplakin OS=Rattus norvegicus OX=10116 GN=Ppl PE=1 SV=1 - [D4A5T8_RAT]	48	-0.833653	-0.535216	-0.599043	-1.04325	-0.903372	-0.698496	-0.738189	-0.705012	-0.75279	-0.761267	0.004947
Q62785	28 kDa heat- and acid-stable phosphoprotein OS=Rattus norvegicus OX=10116 GN=Pdap1 PE=1 SV=1 - [HAP28_RAT]	10	-0.811727	-0.683749	-0.864256	-0.653534	-0.879813	-1.08958	-1.25101	-1.12477	-0.753317	-1.08629	0.000275
F1M9B2	Insulin-like growth factor binding protein 7, isoform CRA_b OS=Rattus norvegicus OX=10116 GN=Igfbp7 PE=1 SV=2 - [F1M9B2_RAT]	6	-1.07368	-0.648787	-0.883414	-0.407845	-0.272479	-0.283679	-0.443819	-0.340994	-0.753431	-0.335243	0.010476
F1LTB8	UDP-glucuronosyltransferase OS=Rattus norvegicus OX=10116 GN=RGD1559459 PE=1 SV=2 - [F1LTB8_RAT]	6	-1.10544	-0.414471	-0.518182	-0.977083	-0.761658	-0.596831	-0.582735	-0.774526	-0.753793	-0.678938	0.019104
Q38PG1	AHNAK 1 (Fragment) OS=Rattus norvegicus OX=10116 PE=2 SV=1 - [Q38PG1_RAT]	5	-1.03102	-0.710067	-0.596254	-0.687979	-0.382083	-0.382378	-0.416034	-0.470145	-0.756331	-0.41266	0.002306
D3ZSU6	Ankyrin repeat domain 11 OS=Rattus norvegicus OX=10116 GN=Ankrd11 PE=1 SV=3 - [D3ZSU6_RAT]	2	-1.16773	-0.545561	-0.84303	-0.479356	-0.744484	-0.818382	-0.563606	-0.821189	-0.758919	-0.736915	0.014213
M0R9B5	Mast cell protease 8-like 2 OS=Rattus norvegicus OX=10116 GN=Mcpt8l2 PE=1 SV=1 - [M0R9B5_RAT]	3	-0.673945	-1.0864	-0.863267	-0.422472	-0.0281367	-0.0878069	-0.360082	-0.268033	-0.761522	-0.186015	0.010021
D3ZHW0	ATP-dependent RNA helicase DHX29 OS=Rattus norvegicus OX=10116 GN=Dhx29 PE=1 SV=2 - [D3ZHW0_RAT]	2	-0.453524	-0.723834	-0.727291	-1.17066	-0.322699	-0.433748	-0.303729	-0.149853	-0.768828	-0.302507	0.011319
B0BNB2	Density-regulated protein OS=Rattus norvegicus OX=10116 GN=Denr PE=2 SV=1 - [B0BNB2_RAT]	4	-0.860175	-0.697415	-0.845938	-0.683467	-0.932899	-1.04327	-1.11831	-1.14835	-0.771749	-1.06071	0.000194
P20651	Serine/threonine-protein phosphatase 2B catalytic subunit beta isoform OS=Rattus norvegicus OX=10116 GN=Ppp3cb PE=1 SV=1 - [PP2BB_RAT]	2	-0.133975	-0.998477	-0.93394	-1.02174	-0.261041	-0.409661	-0.363297	-0.294883	-0.772032	-0.33222	0.03574
P10634	Cytochrome P450 2D26 OS=Rattus norvegicus OX=10116 GN=Cyp2d26 PE=1 SV=2 - [CP2DQ_RAT]	13	-0.974483	-0.600763	-0.604497	-0.91125	-0.581479	-0.353306	-0.413838	-0.436102	-0.772748	-0.446181	0.002656
Q5M949	Nipsnap homolog 3A (C. elegans) OS=Rattus norvegicus OX=10116 GN=Nipsnap3b PE=1 SV=1 - [Q5M949_RAT]	5	-0.683268	-0.870362	-0.904395	-0.644142	-0.89801	-0.906475	-0.844761	-0.965437	-0.775542	-0.903671	0.000588
Q63276	Bile acid-CoA:amino acid N-acyltransferase OS=Rattus norvegicus OX=10116 GN=Baat PE=1 SV=2 - [BAAT_RAT]	6	-1.05047	-0.998734	-0.421625	-0.642057	-0.917279	-0.942015	-0.802631	-0.946265	-0.778221	-0.902047	0.011127
F1LPD0	Collagen alpha-1(XV) chain-like OS=Rattus norvegicus OX=10116 GN=LOC108348074 PE=1 SV=3 - [F1LPD0_RAT]	9	-1.27499	-0.47372	-0.488636	-0.881509	-0.518533	-0.222805	-0.195052	-0.198653	-0.779714	-0.283761	0.02401
D3ZMW5	SH3 and PX domains 2A OS=Rattus norvegicus OX=10116 GN=Sh3pxd2a PE=1 SV=1 - [D3ZMW5_RAT]	2	-1.0938	-0.696098	-0.75654	-0.589253	-0.495655	-0.39726	-0.393296	-0.33505	-0.783922	-0.405315	0.003417
G3V763	Collagen alpha-1(V) chain OS=Rattus norvegicus OX=10116 GN=Col5a1 PE=1 SV=3 - [G3V763_RAT]	6	-0.813745	-1.13399	-0.818403	-0.401292	-0.254885	-0.060648	-0.0783031	-0.0762253	-0.791856	-0.117515	0.010445
B2LYI9	Tenascin C OS=Rattus norvegicus OX=10116 GN=Tnc PE=2 SV=1 - [B2LYI9_RAT]	4	-0.979115	-0.905907	-0.658602	-0.62582	-0.224802	-0.104042	-0.097064	-0.135255	-0.792361	-0.140291	0.001527
A0A0G2K3Y9	Megakaryoblastic leukemia (Translocation) 1 (Predicted) OS=Rattus norvegicus OX=10116 GN=Mkl1 PE=1 SV=1 - [A0A0G2K3Y9_RAT]	2	-0.383752	-0.955689	-0.97703	-0.854009	-0.886225	-0.898805	-0.396497	-0.205431	-0.79262	-0.59674	0.00846
B1PLB2	CD34 antigen isoform 2 OS=Rattus norvegicus OX=10116 GN=Cd34 PE=2 SV=1 - [B1PLB2_RAT]	3	-1.03499	-0.947747	-0.648198	-0.560266	0.0603771	0.373089	0.0233568	0.239245	-0.7978	0.174017	0.003964
A0A096MIS3	Translation initiation factor eIF-2B subunit delta OS=Rattus norvegicus OX=10116 GN=Eif2b4 PE=1 SV=2 - [A0A096MIS3_RAT]	4	-0.864553	-0.355595	-0.841089	-1.13068	-0.760854	-0.852122	-1.09099	-1.06227	-0.797979	-0.94156	0.012695
A0A0G2K5C7	NIMA-related kinase 1 OS=Rattus norvegicus OX=10116 GN=Nek1 PE=1 SV=1 - [A0A0G2K5C7_RAT]	2	-0.836408	-0.844547	-1.17134	-0.345514	-2.10667	-0.202957	-0.130711	-0.263293	-0.799453	-0.675907	0.015095
M0RA79	Uncharacterized protein OS=Rattus norvegicus OX=10116 PE=1 SV=1 - [M0RA79_RAT]	3	-0.577403	-0.684653	-0.831185	-1.10479	-1.35104	-1.06109	-1.05263	-1.22516	-0.799508	-1.17248	0.003884
F1MAB8	Kinesin family member 11 OS=Rattus norvegicus OX=10116 GN=Kif11 PE=1 SV=1 - [F1MAB8_RAT]	3	-0.53032	-1.40373	-1.28333	0	-0.158918	-0.500176	-0.401821	-0.518779	-0.804345	-0.394923	0.021391
Q0D2L3	Agmatinase, mitochondrial OS=Rattus norvegicus OX=10116 GN=Agmat PE=2 SV=1 - [SPEB_RAT]	8	-0.587041	-0.861443	-0.731949	-1.04	-1.25729	-1.26644	-1.22903	-1.14564	-0.805108	-1.2246	0.001993
O35826	Bifunctional UDP-N-acetylglucosamine 2-epimerase/N-acetylmannosamine kinase OS=Rattus norvegicus OX=10116 GN=Gne PE=1 SV=1 - [GLCNE_RAT]	4	-0.680795	-0.419375	-0.800143	-1.34662	-1.07954	-0.587532	-0.814502	-0.726434	-0.811732	-0.802002	0.0233
D4ABW9	Tripartite motif protein 29 (Predicted), isoform CRA_b OS=Rattus norvegicus OX=10116 GN=Trim29 PE=4 SV=1 - [D4ABW9_RAT]	4	-0.675512	-1.09526	-0.991313	-0.489642	-1.39578	-1.46633	-1.16825	-1.53611	-0.812932	-1.39162	0.007628
A0A096XKT9	NADH-ubiquinone oxidoreductase chain 5 OS=Rattus norvegicus OX=10116 GN=ND5 PE=3 SV=1 - [A0A096XKT9_RAT]	2	-1.24648	-0.236134	-0.644022	-1.14318	-0.42312	-0.714382	-0.499852	-0.348381	-0.817453	-0.496434	0.038858
Q5I0N5	Agxt protein (Fragment) OS=Rattus norvegicus OX=10116 GN=Agxt PE=2 SV=1 - [Q5I0N5_RAT]	11	-0.713821	-0.841839	-0.68137	-1.06979	-0.856102	-0.620002	-0.600858	-0.67165	-0.826705	-0.687153	0.001393
I6L9G5	Rcn3 protein OS=Rattus norvegicus OX=10116 GN=Rcn3 PE=1 SV=1 - [I6L9G5_RAT]	5	-0.910835	-1.09283	-0.835679	-0.510332	-0.360712	-0.261531	-0.311116	-0.255355	-0.837418	-0.297178	0.004173
M0RCH6	Uncharacterized protein OS=Rattus norvegicus OX=10116 PE=1 SV=2 - [M0RCH6_RAT]	9	-0.862863	-0.858973	-0.990073	-0.641234	-0.71228	-0.774981	-0.836717	-0.735957	-0.838286	-0.764984	0.000629
A0A0G2K588	Latent-transforming growth factor beta-binding protein 4 OS=Rattus norvegicus OX=10116 GN=Ltbp4 PE=1 SV=1 - [A0A0G2K588_RAT]	15	-0.915754	-0.976659	-0.615045	-0.847145	-0.554349	-0.180645	-0.234631	-0.187327	-0.838651	-0.289238	0.000809
F1LZ34	S-adenosylmethionine synthase OS=Rattus norvegicus OX=10116 GN=Mat1a PE=1 SV=3 - [F1LZ34_RAT]	8	-0.477165	-0.994784	-0.737284	-1.16824	-1.02785	-0.90129	-0.931806	-1.06782	-0.844368	-0.982192	0.008566
Q8CG08	Collagen triple helix repeat-containing protein 1 OS=Rattus norvegicus OX=10116 GN=Cthrc1 PE=1 SV=1 - [CTHR1_RAT]	4	-0.93432	-1.21954	-0.786239	-0.440957	-0.239968	-0.115575	-0.150374	-0.127577	-0.845264	-0.158373	0.010856
P02692	Fatty acid-binding protein, liver OS=Rattus norvegicus OX=10116 GN=Fabp1 PE=1 SV=1 - [FABPL_RAT]	8	-1.11774	-1.12684	-0.821548	-0.323798	-1.09828	-1.57285	-1.62813	-1.64764	-0.847482	-1.48672	0.018458
Q6SKG1	Acyl-coenzyme A synthetase ACSM3, mitochondrial OS=Rattus norvegicus OX=10116 GN=Acsm3 PE=2 SV=1 - [ACSM3_RAT]	4	-0.710092	-0.908894	-0.741849	-1.04325	-0.772268	-0.660423	-0.544134	-0.763581	-0.851022	-0.685101	0.000733
Q4FZU4	ADAMTS-like protein 4 OS=Rattus norvegicus OX=10116 GN=Adamtsl4 PE=2 SV=1 - [ATL4_RAT]	3	-1.03314	-1.14546	-0.50918	-0.722808	-0.501249	-0.191637	-0.231635	-0.121619	-0.852648	-0.261535	0.007457
B5DFA3	Bucs1 protein OS=Rattus norvegicus OX=10116 GN=Acsm1 PE=2 SV=1 - [B5DFA3_RAT]	22	-0.563357	-0.725321	-1.07006	-1.05622	-0.585381	-0.364181	-0.378162	-0.344618	-0.85374	-0.418086	0.004452
M0RA15	Uncharacterized protein OS=Rattus norvegicus OX=10116 PE=4 SV=1 - [M0RA15_RAT]	2	-0.837743	-1.0432	-1.39251	-0.149676	-0.726024	-1.08079	-1.07216	-0.935926	-0.855782	-0.953725	0.046411
D3ZX46	OTU deubiquitinase 6A OS=Rattus norvegicus OX=10116 GN=Otud6a PE=4 SV=1 - [D3ZX46_RAT]	2	-1.21412	-0.651622	-0.367885	-1.23891	-0.534938	-0.387246	-0.508139	-0.249425	-0.868135	-0.419937	0.025067
O89035	Mitochondrial dicarboxylate carrier OS=Rattus norvegicus OX=10116 GN=Slc25a10 PE=1 SV=1 - [O89035_RAT]	4	-1.3031	-0.29648	-0.787686	-1.08787	-0.906853	-0.858826	-0.825392	-0.89312	-0.868784	-0.871048	0.025814
F1M5Q4	Fibrillin 2 OS=Rattus norvegicus OX=10116 GN=Fbn2 PE=4 SV=3 - [F1M5Q4_RAT]	30	-1.07914	-0.924598	-0.630967	-0.842767	-0.511296	-0.192151	-0.28589	-0.207999	-0.869367	-0.299334	0.001405
D3ZIQ1	Acyl-CoA thioesterase 4 OS=Rattus norvegicus OX=10116 GN=Acot4 PE=1 SV=1 - [D3ZIQ1_RAT]	3	-1.04006	-0.93309	-0.482975	-1.02399	-1.18304	-1.12601	-1.18928	-1.23107	-0.870027	-1.18235	0.004873
A0A0G2K3P4	Obscurin, cytoskeletal calmodulin and titin-interacting RhoGEF OS=Rattus norvegicus OX=10116 GN=Obscn PE=1 SV=1 - [A0A0G2K3P4_RAT]	3	-0.851232	-0.997736	-0.829489	-0.809587	-0.534417	-0.294775	-0.54205	-0.284606	-0.872011	-0.413962	0.000105
O35186	Cathepsin K OS=Rattus norvegicus OX=10116 GN=Ctsk PE=2 SV=1 - [CATK_RAT]	3	-0.919169	-0.999743	-0.856388	-0.760762	-1.06989	-0.927975	-0.78577	-0.737831	-0.884015	-0.880366	0.000166
Q5XIB1	Protein TSSC4 OS=Rattus norvegicus OX=10116 GN=Tssc4 PE=2 SV=1 - [TSSC4_RAT]	2	-0.906709	-1.02873	-0.816864	-0.78738	-0.6381	-0.771281	-0.939138	-0.490572	-0.884921	-0.709773	0.000185
Q4V8C3	Echinoderm microtubule-associated protein-like 1 OS=Rattus norvegicus OX=10116 GN=Eml1 PE=1 SV=2 - [EMAL1_RAT]	6	-0.765151	-0.66776	-0.979302	-1.13781	-0.622256	-0.447659	-0.455327	-0.400976	-0.887506	-0.481555	0.001955
F1LQ00	Collagen type V alpha 2 chain OS=Rattus norvegicus OX=10116 GN=Col5a2 PE=1 SV=3 - [F1LQ00_RAT]	14	-1.03708	-1.05559	-0.76158	-0.698973	-0.424708	-0.254105	-0.328796	-0.332096	-0.888305	-0.334926	0.001269
Q6TUH9	Corticosteroid 11-beta-dehydrogenase isozyme 1 OS=Rattus norvegicus OX=10116 GN=Hsd11b1 PE=1 SV=1 - [Q6TUH9_RAT]	5	-0.874679	-0.858383	-0.794804	-1.02862	-0.46857	-0.156889	-0.252387	-0.261149	-0.889121	-0.284749	0.000166
B5DF03	Peptidylprolyl isomerase (Fragment) OS=Rattus norvegicus OX=10116 GN=Fkbp3 PE=2 SV=1 - [B5DF03_RAT]	10	-1.16387	-0.487513	-1.14983	-0.760721	-0.83043	-0.989015	-1.11118	-1.09746	-0.890483	-1.00702	0.009359
P19225	Cytochrome P450 2C70 OS=Rattus norvegicus OX=10116 GN=Cyp2c70 PE=2 SV=1 - [CP270_RAT]	4	-1.19347	-0.570848	-0.607054	-1.20163	-1.22059	-1.05106	-0.881898	-0.823799	-0.89325	-0.994337	0.011658
G3V9G5	RCG24674, isoform CRA_b OS=Rattus norvegicus OX=10116 GN=Synm PE=1 SV=2 - [G3V9G5_RAT]	19	-1.1393	-0.815051	-0.812642	-0.809546	-0.796952	-1.10207	-1.16272	-1.05172	-0.894135	-1.02836	0.000751
D3ZSP1	Small nuclear ribonucleoprotein polypeptide E OS=Rattus norvegicus OX=10116 GN=Snrpe PE=4 SV=1 - [D3ZSP1_RAT]	2	-1.1162	-0.874781	-0.872915	-0.735202	-0.326128	-0.178454	-0.140794	-0.316785	-0.899774	-0.24054	0.000657
Q923W4	Hepatoma-derived growth factor-related protein 3 OS=Rattus norvegicus OX=10116 GN=Hdgfl3 PE=1 SV=1 - [HDGR3_RAT]	4	-1.4199	-0.80313	-0.790207	-0.591701	-0.751629	-0.706207	-0.844426	-0.706282	-0.901235	-0.752136	0.012597
P38062	Methionine aminopeptidase 2 OS=Rattus norvegicus OX=10116 GN=Metap2 PE=1 SV=2 - [MAP2_RAT]	4	0	-1.67552	-1.98021	0	-1.41605	-1.52497	-1.63889	0	-0.913932	-1.14498	0.000789
P01015	Angiotensinogen OS=Rattus norvegicus OX=10116 GN=Agt PE=1 SV=1 - [ANGT_RAT]	7	-0.867202	-1.43302	-0.454355	-0.92308	-1.04187	-0.970963	-0.943004	-0.873542	-0.919415	-0.957344	0.017148
Q62952	Dihydropyrimidinase-related protein 3 OS=Rattus norvegicus OX=10116 GN=Dpysl3 PE=1 SV=2 - [DPYL3_RAT]	18	-1.00525	-0.973856	-0.893867	-0.808233	-0.421756	-0.308142	-0.383394	-0.330275	-0.920301	-0.360892	0.000101
G3V778	Pyruvate dehydrogenase kinase, isoenzyme 4 OS=Rattus norvegicus OX=10116 GN=Pdk4 PE=1 SV=1 - [G3V778_RAT]	3	-1.19513	-0.712857	-0.889953	-0.899919	-0.906093	-0.969048	-1.01677	-1.06031	-0.924466	-0.988054	0.001475
B2RZ77	Dermatopontin OS=Rattus norvegicus OX=10116 GN=Dpt PE=1 SV=1 - [B2RZ77_RAT]	5	-1.1478	-1.31734	-0.673301	-0.58205	-0.450227	-0.31928	-0.407351	-0.44598	-0.930121	-0.40571	0.011293
A0A0H2UHH2	Serum amyloid P-component OS=Rattus norvegicus OX=10116 GN=Apcs PE=1 SV=1 - [A0A0H2UHH2_RAT]	8	-0.657969	-1.3426	-1.12384	-0.597382	-0.802182	-0.778345	-0.719904	-0.750031	-0.930448	-0.762615	0.011067
P47875	Cysteine and glycine-rich protein 1 OS=Rattus norvegicus OX=10116 GN=Csrp1 PE=1 SV=2 - [CSRP1_RAT]	9	-0.781958	-1.01625	-1.15772	-0.788907	-0.663042	-0.763502	-0.811597	-0.60108	-0.936208	-0.709805	0.001011
Q66H31	Hypothetical LOC287798, isoform CRA_a OS=Rattus norvegicus OX=10116 GN=MGC95210 PE=2 SV=1 - [Q66H31_RAT]	2	-1.01925	-0.731182	-0.997095	-1.05475	-0.84648	-0.843739	-0.853895	-1.35581	-0.95057	-0.974982	0.000452
P55006	Retinol dehydrogenase 7 OS=Rattus norvegicus OX=10116 GN=Rdh7 PE=1 SV=1 - [RDH7_RAT]	11	-1.16036	-0.628215	-0.691093	-1.34283	-0.873748	-0.452026	-0.521179	-0.594307	-0.955624	-0.610315	0.00939
P18163	Long-chain-fatty-acid--CoA ligase 1 OS=Rattus norvegicus OX=10116 GN=Acsl1 PE=1 SV=1 - [ACSL1_RAT]	32	-1.35707	-0.501189	-0.603703	-1.36089	-1.09657	-0.83332	-0.868059	-0.824552	-0.955714	-0.905624	0.024643
F1LUD3	Uncharacterized protein OS=Rattus norvegicus OX=10116 PE=1 SV=2 - [F1LUD3_RAT]	15	-1.35632	-1.20925	-0.648768	-0.616834	-0.559794	-0.500145	-0.608615	-0.527476	-0.957793	-0.549007	0.012151
P04550	Parathymosin OS=Rattus norvegicus OX=10116 GN=Ptms PE=1 SV=2 - [PTMS_RAT]	4	-0.719009	-0.962526	-1.34448	-0.805542	-1.02512	-1.2079	-1.07372	-1.08416	-0.957889	-1.09772	0.003974
Q6AYD6	PDZ and LIM domain protein 2 OS=Rattus norvegicus OX=10116 GN=Pdlim2 PE=1 SV=1 - [PDLI2_RAT]	3	-1.16893	-0.660606	-1.0513	-0.958328	-0.98356	-1.11834	-0.847449	-1.09572	-0.95979	-1.01127	0.001637
A0A0G2K0D3	Leiomodin-1 OS=Rattus norvegicus OX=10116 GN=Lmod1 PE=1 SV=1 - [LMOD1_RAT]	2	-1.2506	-1.22769	-0.621217	-0.764058	-0.432677	-0.23696	-0.181602	-0.313135	-0.965891	-0.291094	0.006892
E9PU10	Interferon gamma-inducible protein 47 OS=Rattus norvegicus OX=10116 GN=Ifi47 PE=1 SV=3 - [E9PU10_RAT]	5	-0.885877	-0.982977	-0.756344	-1.26329	-0.91827	-0.481432	-0.456002	-0.626435	-0.972122	-0.620535	0.00143
D3ZVB7	Osteoglycin OS=Rattus norvegicus OX=10116 GN=Ogn PE=1 SV=1 - [D3ZVB7_RAT]	8	-1.13873	-1.01093	-0.880139	-0.887488	-0.316534	-0.108656	-0.0942034	-0.0758484	-0.979321	-0.14881	0.000196
D3ZCP9	Transcription initiation factor IIE subunit beta OS=Rattus norvegicus OX=10116 GN=Gtf2e2 PE=1 SV=1 - [D3ZCP9_RAT]	3	-1.15411	-1.13675	-0.984743	-0.670403	-0.677545	-0.722029	-0.875541	-0.570173	-0.986499	-0.711322	0.001653
D3ZVD7	Keratocan OS=Rattus norvegicus OX=10116 GN=Kera PE=4 SV=1 - [D3ZVD7_RAT]	2	-0.982398	-0.661147	-0.91801	-1.38635	-0.872006	-0.394588	-0.513976	-0.664372	-0.986977	-0.611235	0.005008
D4ABA5	RCG35999, isoform CRA_a OS=Rattus norvegicus OX=10116 GN=Smtn PE=1 SV=1 - [D4ABA5_RAT]	7	-0.931288	-0.959978	-1.03925	-1.02191	-0.90873	-0.717335	-0.719487	-0.841912	-0.988108	-0.796866	1.3e-05
Q5XID7	Armadillo repeat-containing X-linked protein 3 OS=Rattus norvegicus OX=10116 GN=Armcx3 PE=1 SV=1 - [ARMX3_RAT]	3	-1.32191	-0.952941	-0.844293	-0.840651	-0.0892761	-0.0508914	-0.122801	0.131793	-0.98995	-0.032794	0.001734
A0A140TAE1	Fatty acid desaturase 2 OS=Rattus norvegicus OX=10116 GN=Fads2 PE=1 SV=1 - [A0A140TAE1_RAT]	3	-1.62642	-1.1252	-0.452674	-0.777353	-0.958119	-0.809449	-0.600041	-0.880872	-0.995411	-0.81212	0.027039
A0A0G2KAY2	Troponin T, fast skeletal muscle OS=Rattus norvegicus OX=10116 GN=Tnnt3 PE=1 SV=1 - [A0A0G2KAY2_RAT]	2	-1.40662	-0.896024	-0.276846	-1.40325	-0.651453	-0.0956512	-0.0461543	-0.233294	-0.995683	-0.256638	0.03177
A0A0G2K0Q7	Myosin light chain kinase OS=Rattus norvegicus OX=10116 GN=Mylk PE=1 SV=1 - [A0A0G2K0Q7_RAT]	24	-1.07386	-1.06222	-1.08159	-0.788161	-0.874387	-0.818952	-0.865438	-0.812127	-1.00146	-0.842726	0.00032
Q00981	Ubiquitin carboxyl-terminal hydrolase isozyme L1 OS=Rattus norvegicus OX=10116 GN=Uchl1 PE=1 SV=2 - [UCHL1_RAT]	2	-0.914865	-1.16268	-1.23606	-0.692938	-0.595346	-0.747772	-0.848815	-0.661435	-1.00164	-0.713342	0.002367
A0A0G2K1R4	Retinol dehydrogenase 5 OS=Rattus norvegicus OX=10116 GN=Rdh5 PE=1 SV=1 - [A0A0G2K1R4_RAT]	2	-1.28209	-0.46547	-0.754832	-1.52146	-0.833743	-0.349982	-0.370176	-0.384347	-1.00596	-0.484562	0.022539
A0A0G2K654	Histone cluster 1 H1 family member c OS=Rattus norvegicus OX=10116 GN=Hist1h1c PE=1 SV=1 - [A0A0G2K654_RAT]	3	-1.90242	-0.864846	-0.532788	-0.803281	-0.797407	-0.707303	-0.80608	-0.749949	-1.02583	-0.765185	0.042075
P02454	Collagen alpha-1(I) chain OS=Rattus norvegicus OX=10116 GN=Col1a1 PE=1 SV=5 - [CO1A1_RAT]	46	-1.26884	-1.09445	-0.784384	-1.01327	-0.740929	-0.573627	-0.587076	-0.569842	-1.04024	-0.617869	0.000986
P54318	Pancreatic lipase-related protein 2 OS=Rattus norvegicus OX=10116 GN=Pnliprp2 PE=1 SV=1 - [LIPR2_RAT]	6	-1.12332	-1.69015	-0.882766	-0.468997	-1.303	-1.27285	-1.366	-1.25342	-1.04131	-1.29882	0.0245
F1LSR2	GRB2-associated-binding protein 2 OS=Rattus norvegicus OX=10116 GN=Gab2 PE=1 SV=3 - [F1LSR2_RAT]	2	-1.48724	-0.854502	-0.437702	-1.42061	-0.197364	0.116793	0.130267	-0.0313793	-1.05001	0.00457914	0.021922
Q9JI04	Alpha 4 type V collagen OS=Rattus norvegicus OX=10116 GN=Col5a3 PE=2 SV=1 - [Q9JI04_RAT]	3	-1.32505	-1.12439	-0.769181	-0.981756	-0.909435	-0.652643	-0.692765	-0.862974	-1.05009	-0.779454	0.001582
P24008	3-oxo-5-alpha-steroid 4-dehydrogenase 1 OS=Rattus norvegicus OX=10116 GN=Srd5a1 PE=1 SV=2 - [S5A1_RAT]	2	-1.57984	-0.530127	-0.939479	-1.15224	-1.1819	-1.31479	-1.12322	-1.11538	-1.05042	-1.18382	0.014519
A0A0G2KAN1	Collagen, type I, alpha 2 OS=Rattus norvegicus OX=10116 GN=NEWGENE_621351 PE=1 SV=1 - [A0A0G2KAN1_RAT]	38	-1.18319	-1.08387	-0.897832	-1.05024	-0.761285	-0.545614	-0.511069	-0.497544	-1.05378	-0.578878	0.000148
A2VCW9	Alpha-aminoadipic semialdehyde synthase, mitochondrial OS=Rattus norvegicus OX=10116 GN=Aass PE=2 SV=1 - [AASS_RAT]	16	-1.35275	-0.667274	-0.822466	-1.40985	-0.852464	-0.489004	-0.508429	-0.522186	-1.06309	-0.59302	0.00814
Q5XIH1	Asporin OS=Rattus norvegicus OX=10116 GN=Aspn PE=1 SV=1 - [Q5XIH1_RAT]	10	-1.36049	-0.877122	-0.915933	-1.14457	-0.510592	-0.137488	-0.123156	-0.153939	-1.07453	-0.231294	0.00119
Q5QD51	A-kinase anchor protein 12 OS=Rattus norvegicus OX=10116 GN=Akap12 PE=1 SV=1 - [AKA12_RAT]	23	-1.31804	-1.26904	-1.03495	-0.67627	-0.86533	-0.929635	-0.787593	-0.886771	-1.07457	-0.867332	0.003335
F1LNV5	Calcium uptake protein 1, mitochondrial OS=Rattus norvegicus OX=10116 GN=Micu1 PE=1 SV=2 - [F1LNV5_RAT]	4	-0.774523	-0.615138	-1.20792	-1.7218	-0.367202	-0.786454	-0.601008	-0.450926	-1.07984	-0.551397	0.019779
Q5M7V3	LOC367586 protein OS=Rattus norvegicus OX=10116 GN=LOC367586 PE=2 SV=1 - [Q5M7V3_RAT]	9	-1.01249	-1.03338	-1.23675	-1.04937	-0.85262	-0.870676	-0.852641	-0.894752	-1.083	-0.867672	0.000101
O70127	Bile salt export pump OS=Rattus norvegicus OX=10116 GN=Abcb11 PE=1 SV=1 - [ABCBB_RAT]	17	-1.46633	-0.644963	-0.743473	-1.48063	-1.00018	-0.762837	-0.819123	-0.796061	-1.08385	-0.84455	0.014891
D3ZAF5	Periostin OS=Rattus norvegicus OX=10116 GN=Postn PE=1 SV=1 - [D3ZAF5_RAT]	3	-1.3621	-1.02271	-0.96151	-1.14277	-0.820282	-0.77973	-0.748115	-0.810345	-1.12227	-0.789618	0.000463
P14659	Heat shock-related 70 kDa protein 2 OS=Rattus norvegicus OX=10116 GN=Hspa2 PE=1 SV=2 - [HSP72_RAT]	2	-1.30585	-1.18263	-1.10597	-0.918558	-0.671422	-0.679551	-0.463459	-0.607251	-1.12825	-0.605421	0.000333
D3Z9M5	Peptidylprolyl isomerase OS=Rattus norvegicus OX=10116 GN=Fkbp7 PE=4 SV=1 - [D3Z9M5_RAT]	6	-1.37629	-1.53188	-0.966354	-0.651068	-0.511042	-0.517153	-0.512646	-0.454472	-1.1314	-0.498828	0.008273
P20909	Collagen alpha-1(XI) chain OS=Rattus norvegicus OX=10116 GN=Col11a1 PE=1 SV=2 - [COBA1_RAT]	4	-1.55162	-1.18302	-0.763195	-1.09715	-0.549662	-0.469287	-0.556201	-0.608344	-1.14874	-0.545873	0.003845
D3ZAM3	Carboxypeptidase B OS=Rattus norvegicus OX=10116 GN=Cpb1 PE=4 SV=2 - [D3ZAM3_RAT]	7	-1.05062	-1.62238	-1.6858	-0.246982	-0.943801	-1.42425	-1.37757	-1.35169	-1.15145	-1.27433	0.039999
B0BMS8	Myl9 protein OS=Rattus norvegicus OX=10116 GN=Myl9 PE=1 SV=1 - [B0BMS8_RAT]	4	-1.26273	-1.40079	-1.01924	-0.964903	-1.011	-0.952797	-1.02841	-0.984817	-1.16192	-0.994257	0.000671
D4A412	Uncharacterized protein OS=Rattus norvegicus OX=10116 PE=4 SV=1 - [D4A412_RAT]	2	-1.75369	-0.249802	-1.005	-1.69452	-1.06943	-0.929643	-0.71732	-0.911979	-1.17575	-0.907093	0.043609
P12939	Cytochrome P450 2D10 OS=Rattus norvegicus OX=10116 GN=Cyp2d10 PE=1 SV=1 - [CP2DA_RAT]	8	-1.27909	-0.738277	-1.14368	-1.56012	-0.960328	-0.511637	-0.522666	-0.727034	-1.18029	-0.680416	0.00417
D3ZL10	Collagen type VI alpha 6 chain OS=Rattus norvegicus OX=10116 GN=Col6a6 PE=1 SV=3 - [D3ZL10_RAT]	14	-1.69903	-1.0422	-0.656262	-1.32625	-0.468148	-0.181986	-0.114349	-0.218058	-1.18093	-0.245636	0.009908
D4A8N0	Family with sequence similarity 111, member A OS=Rattus norvegicus OX=10116 GN=Fam111a PE=1 SV=1 - [D4A8N0_RAT]	6	-1.11604	-0.883043	-1.56302	-1.19964	-0.330199	-0.100041	-0.138257	-0.357284	-1.19043	-0.231445	0.001949
Q3MIE1	Mpnd protein (Fragment) OS=Rattus norvegicus OX=10116 GN=Mpnd PE=2 SV=1 - [Q3MIE1_RAT]	2	-0.741676	-1.16578	-0.92423	-1.9301	-1.36322	-0.731827	-0.837276	-0.386424	-1.19045	-0.829687	0.017405
P31232	Transgelin OS=Rattus norvegicus OX=10116 GN=Tagln PE=1 SV=2 - [TAGL_RAT]	10	-1.42123	-1.4247	-1.05963	-0.860873	-0.938367	-0.832775	-0.764741	-0.784242	-1.19161	-0.830031	0.001833
H2BF30	Fatty acid desaturase 1 OS=Rattus norvegicus OX=10116 GN=Fads1 PE=2 SV=1 - [H2BF30_RAT]	3	-1.36616	-1.11042	-0.859644	-1.44015	-1.09469	-0.985569	-0.853176	-0.683621	-1.19409	-0.904264	0.001527
D3ZSH7	Collagen type XVII alpha 1 chain OS=Rattus norvegicus OX=10116 GN=Col17a1 PE=4 SV=2 - [D3ZSH7_RAT]	2	-1.74159	-0.939542	-0.260129	-1.89148	-2.06746	-1.63445	-1.25956	-1.02378	-1.20818	-1.49631	0.049777
P23565	Alpha-internexin OS=Rattus norvegicus OX=10116 GN=Ina PE=1 SV=2 - [AINX_RAT]	6	-1.35017	-1.65349	-1.04224	-0.844693	-1.30306	-1.31332	-1.4002	-1.1693	-1.22265	-1.29647	0.00425
F7FEM5	Suprabasin OS=Rattus norvegicus OX=10116 GN=Sbsn PE=1 SV=1 - [F7FEM5_RAT]	4	-1.11384	-1.22287	-1.29444	-1.30123	-1.03592	-1.21572	-1.02181	-1.23429	-1.23309	-1.12693	4.6e-05
P55280	Cadherin-6 OS=Rattus norvegicus OX=10116 GN=Cdh6 PE=1 SV=1 - [CADH6_RAT]	2	-1.86896	-1.78801	-0.916909	-0.4786	-0.440188	-0.144402	-0.598717	-0.290071	-1.26312	-0.368345	0.03177
F1LRL9	Microtubule-associated protein 1B OS=Rattus norvegicus OX=10116 GN=Map1b PE=1 SV=1 - [F1LRL9_RAT]	3	-1.95461	-1.20701	-0.967345	-0.972574	-1.13662	-1.2398	-1.18819	-1.22366	-1.27538	-1.19706	0.009223
D3ZUU6	C-type lectin domain family 3, member B OS=Rattus norvegicus OX=10116 GN=Clec3b PE=1 SV=1 - [D3ZUU6_RAT]	4	-1.42789	-1.46651	-1.14068	-1.11241	-1.13685	-1.03081	-0.846588	-1.04544	-1.28687	-1.01492	0.000355
G3V976	Carboxypeptidase A2 OS=Rattus norvegicus OX=10116 GN=Cpa2 PE=4 SV=1 - [G3V976_RAT]	8	-1.69255	-1.49978	-1.71482	-0.300466	-1.45627	-1.64688	-1.7856	-1.86342	-1.3019	-1.68804	0.028853
D4A2G6	Thrombospondin 2 OS=Rattus norvegicus OX=10116 GN=Thbs2 PE=4 SV=2 - [D4A2G6_RAT]	5	-1.2324	-1.42378	-1.29067	-1.2748	-1.15878	-0.674002	-0.578947	-0.514212	-1.30541	-0.731486	2.9e-05
D3ZJB1	Microfibril-associated protein 5 OS=Rattus norvegicus OX=10116 GN=Mfap5 PE=4 SV=1 - [D3ZJB1_RAT]	2	-2.03485	-1.57912	-0.851446	-0.775725	-0.696465	-0.737454	-1.07482	-0.941562	-1.31029	-0.862576	0.019886
P63090	Pleiotrophin OS=Rattus norvegicus OX=10116 GN=Ptn PE=1 SV=1 - [PTN_RAT]	3	-1.9121	-1.33599	-0.926356	-1.15746	-0.681556	-0.474461	-0.641661	-0.619551	-1.33298	-0.604307	0.005478
Q5FVG5	Similar to tropomyosin 1, embryonic fibroblast-rat, isoform CRA_c OS=Rattus norvegicus OX=10116 GN=Tpm2 PE=2 SV=1 - [Q5FVG5_RAT]	3	-1.36271	-1.6782	-1.26181	-1.03053	-0.825035	-0.663764	-0.665142	-0.828899	-1.33331	-0.74571	0.001118
D3ZIC4	Protein phosphatase 1, regulatory (Inhibitor) subunit 12B (Predicted) OS=Rattus norvegicus OX=10116 GN=Ppp1r12b PE=1 SV=1 - [D3ZIC4_RAT]	10	-1.85621	-1.01188	-1.18796	-1.30747	-1.19943	-1.18632	-1.09391	-1.29632	-1.34088	-1.19399	0.003369
D3ZJ17	Tubulin tyrosine ligase-like 6 OS=Rattus norvegicus OX=10116 GN=Ttll6 PE=4 SV=2 - [D3ZJ17_RAT]	2	-1.81892	-1.31584	-1.03036	-1.22928	-1.3349	-0.369816	-0.314042	-1.57564	-1.3486	-0.898601	0.002324
A0A0G2K0M8	Neural cell adhesion molecule 1 OS=Rattus norvegicus OX=10116 GN=Ncam1 PE=1 SV=1 - [A0A0G2K0M8_RAT]	5	-1.38663	-1.78635	-1.26866	-0.972144	-1.11337	-1.20699	-1.11514	-1.11214	-1.35345	-1.13691	0.002382
Q923Z2	Tropomyosin 1, alpha, isoform CRA_a OS=Rattus norvegicus OX=10116 GN=Tpm1 PE=1 SV=1 - [Q923Z2_RAT]	4	-1.48265	-1.62188	-1.0824	-1.36123	-1.33394	-1.15684	-1.23435	-0.604984	-1.38704	-1.08253	0.000548
Q80ZA3	Alpha-2 antiplasmin OS=Rattus norvegicus OX=10116 GN=Serpinf1 PE=1 SV=1 - [Q80ZA3_RAT]	8	-1.32128	-1.55305	-1.3444	-1.35552	-0.692939	-0.347248	-0.442655	-0.418406	-1.39356	-0.475312	5.2e-05
Q9ES38	Bile acyl-CoA synthetase OS=Rattus norvegicus OX=10116 GN=Slc27a5 PE=1 SV=1 - [S27A5_RAT]	8	-1.36097	-1.00295	-1.36151	-1.90993	-1.12234	-0.586409	-0.608528	-0.768311	-1.40884	-0.771398	0.003044
F1LQC1	Acyl-coenzyme A oxidase OS=Rattus norvegicus OX=10116 GN=Acox1 PE=1 SV=3 - [F1LQC1_RAT]	19	-1.57579	-1.32458	-1.2473	-1.50935	-1.61764	-1.46591	-1.25763	-1.45298	-1.41426	-1.44854	0.000148
Q01129	Decorin OS=Rattus norvegicus OX=10116 GN=Dcn PE=1 SV=1 - [PGS2_RAT]	18	-1.68863	-1.67484	-1.1587	-1.14326	-0.798934	-0.573618	-0.582075	-0.565591	-1.41636	-0.630054	0.001408
D3ZE04	Collagen type VII alpha 1 chain OS=Rattus norvegicus OX=10116 GN=Col7a1 PE=4 SV=2 - [D3ZE04_RAT]	2	-1.60964	-1.32305	-1.13758	-1.64373	-1.3307	-0.8577	-0.849699	-0.813474	-1.4285	-0.962893	0.000565
P32198	Carnitine O-palmitoyltransferase 1, liver isoform OS=Rattus norvegicus OX=10116 GN=Cpt1a PE=1 SV=2 - [CPT1A_RAT]	9	-1.63219	-1.1182	-1.28144	-1.74797	-1.5424	-1.26259	-1.30196	-1.30121	-1.44495	-1.35204	0.001145
P07871	3-ketoacyl-CoA thiolase B, peroxisomal OS=Rattus norvegicus OX=10116 GN=Acaa1b PE=1 SV=2 - [THIKB_RAT]	2	-1.64035	-1.54906	-1.11119	-1.5067	-2.04419	-2.08181	-2.14443	-1.88267	-1.45182	-2.03828	0.000495
F1LRM7	Collagen alpha-1(II) chain OS=Rattus norvegicus OX=10116 GN=Col2a1 PE=1 SV=1 - [F1LRM7_RAT]	12	-1.74306	-1.31734	-1.12733	-1.6316	-1.02802	-0.815243	-0.734499	-0.749361	-1.45483	-0.83178	0.000917
G3V7S2	Neurofilament medium polypeptide OS=Rattus norvegicus OX=10116 GN=Nefm PE=1 SV=3 - [G3V7S2_RAT]	18	-2.09327	-1.58447	-1.26541	-0.881114	-1.02933	-1.26688	-1.19998	-1.24645	-1.45606	-1.18566	0.008171
F1LMB5	Protein kintoun OS=Rattus norvegicus OX=10116 GN=Dnaaf2 PE=1 SV=3 - [F1LMB5_RAT]	2	-1.82103	-1.446	-1.38272	-1.19691	-0.643205	-0.454505	-0.379552	-0.66994	-1.46167	-0.5368	0.000674
G3V718	Whey acidic protein OS=Rattus norvegicus OX=10116 GN=Wap PE=4 SV=1 - [G3V718_RAT]	2	-1.38401	-1.45329	-1.547	-1.63991	-1.80027	-2.03513	-2.27849	-2.24222	-1.50605	-2.08903	5.2e-05
Q6P6Q2	Keratin, type II cytoskeletal 5 OS=Rattus norvegicus OX=10116 GN=Krt5 PE=1 SV=1 - [K2C5_RAT]	12	-1.59636	-1.50007	-1.55884	-1.44307	-1.59238	-1.76759	-1.77183	-1.59317	-1.52459	-1.68124	1e-05
A0A0G2JXJ9	Keratin, type I cytoskeletal 14 OS=Rattus norvegicus OX=10116 GN=Krt14 PE=1 SV=1 - [A0A0G2JXJ9_RAT]	2	-1.51219	-1.88456	-1.52215	-1.24952	-1.30584	-1.01589	-0.780266	-0.819405	-1.54211	-0.98035	0.000565
P21807	Peripherin OS=Rattus norvegicus OX=10116 GN=Prph PE=1 SV=1 - [PERI_RAT]	6	-2.0805	-1.98898	-1.49478	-0.741298	-1.06934	-1.40804	-1.44598	-1.53469	-1.57639	-1.36451	0.011478
A0JN25	Microtubule-associated protein OS=Rattus norvegicus OX=10116 GN=Mapt PE=1 SV=1 - [A0JN25_RAT]	2	-2.06559	-0.803853	-1.72166	-1.81101	-1.84994	-2.095	-1.9397	-1.99668	-1.60053	-1.97033	0.007739
A0A0G2K5J0	Sulfotransferase OS=Rattus norvegicus OX=10116 GN=Sult1c3 PE=1 SV=1 - [A0A0G2K5J0_RAT]	2	-1.54641	-1.85237	-1.31726	-1.70967	-1.66162	-1.44177	-1.55205	-1.39607	-1.60643	-1.51288	0.000326
A0A0G2JXU8	Angiotensin-converting enzyme OS=Rattus norvegicus OX=10116 GN=Ace2 PE=3 SV=1 - [A0A0G2JXU8_RAT]	3	-0.980205	-2.98658	-1.64701	-0.911523	-0.288477	0.175121	0.284759	0.247423	-1.63133	0.104706	0.042425
Q920P6	Adenosine deaminase OS=Rattus norvegicus OX=10116 GN=Ada PE=1 SV=3 - [ADA_RAT]	14	-1.45826	-1.49356	-1.78755	-1.79795	-2.13296	-1.78751	-1.70657	-1.86205	-1.63433	-1.87227	0.000166
P70566	Tropomodulin-2 OS=Rattus norvegicus OX=10116 GN=Tmod2 PE=1 SV=1 - [TMOD2_RAT]	2	-1.77486	-1.65163	-1.36622	-1.78145	-1.461	-1.54142	-1.50975	-1.05148	-1.64354	-1.39091	0.000175
Q4FZU2	Keratin, type II cytoskeletal 6A OS=Rattus norvegicus OX=10116 GN=Krt6a PE=1 SV=1 - [K2C6A_RAT]	11	-1.74232	-1.42424	-1.63205	-1.79755	-1.86389	-1.85403	-2.11825	-1.73165	-1.64904	-1.89195	0.000116
F1M7G5	Sulfotransferase OS=Rattus norvegicus OX=10116 GN=Sult2a6 PE=1 SV=3 - [F1M7G5_RAT]	2	-1.49774	-1.70102	-1.45523	-2.04159	-0.851329	-0.540836	-0.573444	-0.382745	-1.6739	-0.587088	0.000466
P07379	Phosphoenolpyruvate carboxykinase, cytosolic [GTP] OS=Rattus norvegicus OX=10116 GN=Pck1 PE=1 SV=1 - [PCKGC_RAT]	8	-1.65999	-1.54551	-1.4615	-2.15333	-2.06164	-1.87364	-1.8626	-1.78089	-1.70508	-1.89469	0.000716
Q5XIL2	Phosphatidylinositol 4-kinase type 2-beta OS=Rattus norvegicus OX=10116 GN=Pi4k2b PE=2 SV=1 - [P4K2B_RAT]	2	-1.83125	-1.95888	-1.30529	-1.90386	-1.79919	-1.73158	-1.4473	-1.27794	-1.74982	-1.564	0.000588
P08721	Osteopontin OS=Rattus norvegicus OX=10116 GN=Spp1 PE=1 SV=2 - [OSTP_RAT]	7	-1.85219	-0.280569	-2.83878	-2.33803	-2.65937	-2.51287	-2.36968	-2.28344	-1.82739	-2.45634	0.045488
P97586	Cell growth regulator with EF hand domain protein 1 OS=Rattus norvegicus OX=10116 GN=Cgref1 PE=1 SV=1 - [CGRE1_RAT]	2	-1.85037	-2.34513	-1.87087	-1.26592	-1.7214	-2.01146	-1.67601	-1.74047	-1.83307	-1.78734	0.002058
B0BNF9	Hydroxyacid oxidase 1 OS=Rattus norvegicus OX=10116 GN=Hao1 PE=1 SV=1 - [B0BNF9_RAT]	11	-2.1937	-2.08912	-1.65547	-1.70551	-0.975252	-0.633007	-0.602246	-0.654118	-1.91095	-0.716156	0.000318
D4ABY7	Uncharacterized protein OS=Rattus norvegicus OX=10116 PE=4 SV=2 - [D4ABY7_RAT]	4	-1.937	-1.86568	-2.1516	-1.69902	-2.1698	-2.09831	-2.10149	-2.05019	-1.91333	-2.10495	0.000101
P07896	Peroxisomal bifunctional enzyme OS=Rattus norvegicus OX=10116 GN=Ehhadh PE=1 SV=2 - [ECHP_RAT]	30	-2.37432	-1.53028	-1.50032	-2.27963	-1.97647	-1.77281	-1.68375	-1.68705	-1.92114	-1.78002	0.002181
A0A0G2K5X9	Cytochrome P450 2E1 OS=Rattus norvegicus OX=10116 GN=Cyp2e1 PE=1 SV=1 - [A0A0G2K5X9_RAT]	3	-2.3085	-1.93788	-1.64104	-2.12158	-1.75452	-1.35995	-1.38426	-1.30694	-2.00225	-1.45142	0.000326
G3V9A3	RCG31390 OS=Rattus norvegicus OX=10116 GN=Sfn PE=3 SV=1 - [G3V9A3_RAT]	5	-2.49828	-1.88843	-1.75994	-1.8736	-2.14576	-2.24348	-1.93137	-2.09847	-2.00506	-2.10477	0.000557
P55159	Serum paraoxonase/arylesterase 1 OS=Rattus norvegicus OX=10116 GN=Pon1 PE=1 SV=3 - [PON1_RAT]	4	-1.82659	-2.5645	-1.69056	-2.0934	-1.46981	-1.13218	-1.06608	-0.962248	-2.04376	-1.15758	0.000813
Q6IFV3	Keratin, type I cytoskeletal 15 OS=Rattus norvegicus OX=10116 GN=Krt15 PE=1 SV=1 - [K1C15_RAT]	9	-2.5081	-1.98407	-2.00419	-1.72928	-1.61808	-2.02365	-1.73472	-2.11887	-2.05641	-1.87383	0.000472
Q9JJ09	Sodium-dependent phosphate transport protein 2B OS=Rattus norvegicus OX=10116 GN=Slc34a2 PE=1 SV=1 - [NPT2B_RAT]	2	-2.15054	-1.89818	-2.12667	-2.20309	-1.89957	-1.60369	-1.51068	-1.67968	-2.09462	-1.67341	2.9e-05
A0A0G2K9Q9	Keratin, type I cytoskeletal 17 OS=Rattus norvegicus OX=10116 GN=Krt17 PE=1 SV=1 - [A0A0G2K9Q9_RAT]	7	-2.21564	-2.34088	-2.08795	-1.89261	-2.18549	-1.89427	-1.79575	-1.97646	-2.13427	-1.96299	8.1e-05
A0A0G2K6P7	Keratin, type II cytoskeletal 4 OS=Rattus norvegicus OX=10116 GN=Krt4 PE=3 SV=1 - [A0A0G2K6P7_RAT]	12	-2.43556	-2.05155	-2.12215	-2.10377	-2.24325	-2.36879	-2.43289	-2.50451	-2.17826	-2.38736	6.4e-05
P07936	Neuromodulin OS=Rattus norvegicus OX=10116 GN=Gap43 PE=1 SV=1 - [NEUM_RAT]	3	-2.62826	-2.40715	-2.28849	-1.61117	-2.25004	-2.4789	-2.77261	-2.78497	-2.23377	-2.57163	0.000993
A0A0G2JSR8	Cytochrome P450, family 17, subfamily a, polypeptide 1 OS=Rattus norvegicus OX=10116 GN=Cyp17a1 PE=1 SV=1 - [A0A0G2JSR8_RAT]	11	-2.38157	-1.89177	-2.02486	-2.66703	-2.34635	-2.2445	-2.09881	-2.02459	-2.24131	-2.17856	0.000464
P09875	UDP-glucuronosyltransferase 2B1 OS=Rattus norvegicus OX=10116 GN=Ugt2b1 PE=2 SV=1 - [UD2B1_RAT]	5	-2.47814	-2.27872	-2.09341	-2.19416	-1.38994	-0.995911	-0.958094	-0.954713	-2.26111	-1.07466	4.6e-05
D3ZHQ6	Small proline-rich protein 3 OS=Rattus norvegicus OX=10116 GN=Sprr3 PE=4 SV=1 - [D3ZHQ6_RAT]	5	-3.11093	-2.32874	-2.10498	-1.99058	-2.54808	-2.66749	-2.40581	-2.61289	-2.38381	-2.55857	0.001326
P05183	Cytochrome P450 3A2 OS=Rattus norvegicus OX=10116 GN=Cyp3a2 PE=1 SV=2 - [CP3A2_RAT]	3	-2.85716	-2.45471	-2.20876	-2.05369	-2.42891	-2.1991	-1.95331	-2.33983	-2.39358	-2.23029	0.000357
A0A0G2K6S9	Myosin-11 OS=Rattus norvegicus OX=10116 GN=Myh11 PE=1 SV=1 - [A0A0G2K6S9_RAT]	54	-2.53933	-2.91091	-2.3938	-2.53853	-2.23288	-2.05872	-2.02511	-2.03913	-2.59564	-2.08896	6.6e-05
F6QBA3	Perilipin OS=Rattus norvegicus OX=10116 GN=Plin2 PE=1 SV=1 - [F6QBA3_RAT]	13	-2.82593	-2.61186	-2.73619	-2.41933	-2.69611	-2.83799	-2.86896	-2.81119	-2.64833	-2.80356	3.7e-05
Q6IFV4	Keratin, type I cytoskeletal 13 OS=Rattus norvegicus OX=10116 GN=Krt13 PE=3 SV=1 - [K1C13_RAT]	12	-2.89197	-2.76559	-2.64693	-2.80792	-2.91564	-2.92127	-2.77554	-2.80463	-2.7781	-2.85427	6e-06
D4A5U3	Protein-glutamine gamma-glutamyltransferase E OS=Rattus norvegicus OX=10116 GN=Tgm3 PE=3 SV=1 - [TGM3_RAT]	3	-3.88117	-3.03647	-3.02697	-3.24991	-3.37871	-3.16823	-2.93885	-3.50603	-3.29863	-3.24795	0.000185
Q08290	Calponin-1 OS=Rattus norvegicus OX=10116 GN=Cnn1 PE=1 SV=1 - [CNN1_RAT]	5	-4.40444	-4.30663	-3.42864	-3.09438	-3.22872	-3.70801	-3.88552	-3.88049	-3.80852	-3.67569	0.000588
G3V9L4	Glycosylation dependent cell adhesion molecule 1, isoform CRA_a OS=Rattus norvegicus OX=10116 GN=Glycam1 PE=4 SV=1 - [G3V9L4_RAT]	4	-3.43256	-4.53101	-3.98624	-3.76282	-3.92786	-3.76898	-3.74225	-4.17445	-3.92816	-3.90338	0.000178
