# Supplementary material for: Liver Proteome Profile of Growth Restricted and Appropriately Grown Newborn Wistar Rats Associated with Maternal Undernutrition
Source: Preprints.org preprint supplement (doi:10.20944/preprints202103.0023.v1), 2021-03-01
Supplement: Supplementary file 3 [file Supp Table 3.xlsx]

## Sheet: non-FGR vs. C_q<0.05_2up_0.58
accession	Description	Σ# Unique Peptides	FGR1/C	FGR2/C	FGR3/C	FGR4/C	non-FGR1/C	non-FGR2/C	non-FGR3/C	non-FGR4/C	FGR vs.C	non-FGR vs. C	q value
P30152	Neutrophil gelatinase-associated lipocalin OS=Rattus norvegicus OX=10116 GN=Lcn2 PE=1 SV=2 - [NGAL_RAT]	2	1.1338	0.827213	0.535375	-0.0407853	2.56542	3.90203	3.85533	3.94466	0.613902	3.56686	7e-05
O70352	CD82 antigen OS=Rattus norvegicus OX=10116 GN=Cd82 PE=1 SV=1 - [CD82_RAT]	2	0.772338	0.550891	1.05857	0.875722	1.35308	1.65847	1.70138	1.58064	0.814381	1.57339	6e-06
O54953	Stearoyl-CoA desaturase 2 (Fragment) OS=Rattus norvegicus OX=10116 PE=2 SV=1 - [O54953_RAT]	3	0.897945	1.65518	1.21959	0.613663	1.42276	1.6842	1.54194	1.57501	1.0966	1.55598	2e-06
Q99P74	Ras-related protein Rab-27B OS=Rattus norvegicus OX=10116 GN=Rab27b PE=2 SV=3 - [RB27B_RAT]	5	0.324672	0.278215	0.433567	-0.233932	0.96893	1.71075	1.62591	1.63456	0.20063	1.48504	0.000175
D4A3V0	Eva-1 homolog A, regulator of programmed cell death OS=Rattus norvegicus OX=10116 GN=Eva1a PE=1 SV=1 - [D4A3V0_RAT]	2	1.39508	1.1248	1.40829	1.28028	1.31567	1.48586	1.49509	1.62185	1.30211	1.47962	3e-06
G3V8R3	Globin e1 OS=Rattus norvegicus OX=10116 GN=Hbz PE=3 SV=1 - [G3V8R3_RAT]	6	2.53793	1.9772	1.93058	2.95605	1.91282	1.37227	1.23361	1.19437	2.35044	1.42827	0.000177
D3ZQY4	FRY-like transcription coactivator OS=Rattus norvegicus OX=10116 GN=Fryl PE=1 SV=2 - [D3ZQY4_RAT]	2	1.35621	0.829867	1.08878	0.904033	1.22935	1.45471	1.47938	1.42721	1.04472	1.39767	3e-06
G3V837	CD1d1 antigen OS=Rattus norvegicus OX=10116 GN=Cd1d1 PE=1 SV=1 - [G3V837_RAT]	6	1.19563	0.45831	0.659972	1.00326	1.2922	1.46615	1.38424	1.37157	0.829292	1.37854	<0.000001
D3ZAC0	Integrin subunit alpha 2b OS=Rattus norvegicus OX=10116 GN=Itga2b PE=1 SV=2 - [D3ZAC0_RAT]	18	0.900268	0.329979	0.517308	0.375061	1.06358	1.46799	1.42188	1.45533	0.530654	1.35219	2.5e-05
G3V9H9	Glycoprotein 5, platelet OS=Rattus norvegicus OX=10116 GN=NEWGENE_2724 PE=4 SV=1 - [G3V9H9_RAT]	6	0.747802	0.0234861	0.253467	0.208562	1.0159	1.35168	1.49464	1.50311	0.308329	1.34133	4.5e-05
Q63279	Keratin, type I cytoskeletal 19 OS=Rattus norvegicus OX=10116 GN=Krt19 PE=1 SV=2 - [K1C19_RAT]	5	1.011	0.235657	0.463708	0.375723	1.04276	1.46825	1.44844	1.36969	0.521522	1.33229	2.9e-05
A0A0G2K4H9	Keratin, type I cytoskeletal 12 OS=Rattus norvegicus OX=10116 GN=Krt12 PE=3 SV=1 - [A0A0G2K4H9_RAT]	3	1.10848	-0.420621	-0.67392	0.275067	1.22776	1.20637	1.40901	1.40828	0.0722514	1.31286	3e-06
A0A0G2K4W3	Mediator complex subunit 12 OS=Rattus norvegicus OX=10116 GN=Med12 PE=1 SV=1 - [A0A0G2K4W3_RAT]	3	2.51186	0.250468	0.944669	0.640066	1.18456	1.16724	1.2829	1.61057	1.08677	1.31132	3.5e-05
G3V9Y3	Tetratricopeptide repeat domain 25 OS=Rattus norvegicus OX=10116 GN=Ttc25 PE=1 SV=1 - [G3V9Y3_RAT]	2	0.430363	0.0355202	0.251293	0.384548	1.13041	1.45636	1.47264	1.10441	0.275431	1.29096	3.5e-05
Q68FQ6	Similar to RIKEN cDNA 1700011A15 OS=Rattus norvegicus OX=10116 GN=RGD1305207 PE=2 SV=1 - [Q68FQ6_RAT]	2	0.789277	0.123343	0.772351	0.868808	0.92535	1.29474	1.4593	1.36254	0.638445	1.26048	6.5e-05
Q9EPY0	Caspase recruitment domain-containing protein 9 OS=Rattus norvegicus OX=10116 GN=Card9 PE=1 SV=1 - [CARD9_RAT]	3	0.606109	-0.148753	0.268208	0.332531	0.978551	1.29013	1.28183	1.40498	0.264524	1.23887	2.6e-05
Q99ME0	CXC chemokine RTCK1 OS=Rattus norvegicus OX=10116 GN=Ppbp PE=1 SV=1 - [Q99ME0_RAT]	2	0.0460437	-0.834722	-0.75388	-0.263824	0.813024	1.26617	1.38012	1.4023	-0.451596	1.2154	0.000157
B0BNN1	Gltpd2 protein OS=Rattus norvegicus OX=10116 GN=Gltpd2 PE=2 SV=1 - [B0BNN1_RAT]	2	0.648269	1.13772	0.823175	0.766062	1.05819	1.33369	1.13658	1.2993	0.843806	1.20694	8e-06
B2RYI0	WD repeat-containing protein 91 OS=Rattus norvegicus OX=10116 GN=Wdr91 PE=2 SV=1 - [WDR91_RAT]	2	-0.0380899	1.54286	0.87376	0	1.77889	0.480452	1.14268	1.41947	0.594632	1.20537	0.003041
Q58HA5	Carbonic anhydrase XII (Fragment) OS=Rattus norvegicus OX=10116 PE=2 SV=1 - [Q58HA5_RAT]	3	1.72493	1.59342	1.98431	1.51033	1.21366	1.23786	1.17756	1.15785	1.70325	1.19673	<0.000001
M0R8B6	Tubulin beta chain OS=Rattus norvegicus OX=10116 GN=Tubb1 PE=1 SV=1 - [M0R8B6_RAT]	3	1.13952	0.120992	0.237681	0.00448908	0.835115	1.29419	1.37718	1.25472	0.37567	1.1903	9.5e-05
D3ZMT4	Histidine decarboxylase OS=Rattus norvegicus OX=10116 GN=Hdc PE=4 SV=3 - [D3ZMT4_RAT]	8	2.54668	3.01912	2.07831	1.47965	1.0454	1.30968	1.24555	1.14029	2.28094	1.18523	5e-06
P25030	Keratin, type I cytoskeletal 20 OS=Rattus norvegicus OX=10116 GN=Krt20 PE=1 SV=2 - [K1C20_RAT]	21	0.480515	-0.136053	-0.027627	0.445522	1.06031	1.22725	1.23376	1.20802	0.190589	1.18234	2e-06
Q5XI36	CD97 molecule OS=Rattus norvegicus OX=10116 GN=Adgre5 PE=2 SV=1 - [Q5XI36_RAT]	3	1.05431	0.438221	1.10244	0.879875	1.01677	1.30429	1.2516	1.13891	0.86871	1.17789	7e-06
A0A096MJY1	Glypican 6 OS=Rattus norvegicus OX=10116 GN=Gpc6 PE=1 SV=1 - [A0A096MJY1_RAT]	7	1.31324	0.690069	1.28589	1.17274	1.09522	1.29601	1.20965	1.07495	1.11549	1.16896	4e-06
Q71SA3	Thrombospondin 1 OS=Rattus norvegicus OX=10116 GN=Thbs1 PE=2 SV=1 - [Q71SA3_RAT]	6	0.376637	0.0444789	0.216791	0.274972	0.874665	1.29935	1.28355	1.19867	0.22822	1.16406	5e-05
P56627	Aquaporin-9 OS=Rattus norvegicus OX=10116 GN=Aqp9 PE=2 SV=1 - [AQP9_RAT]	4	1.01074	0.953041	0.929481	0.759221	0.93685	1.14459	1.07419	1.36285	0.913121	1.12962	3.4e-05
G3V912	Thioredoxin domain containing 13 OS=Rattus norvegicus OX=10116 GN=Tmx4 PE=1 SV=1 - [G3V912_RAT]	2	0.496736	0.375687	1.17713	0.321359	0.705685	1.34091	1.18601	1.26395	0.592727	1.12414	0.000245
P40241	CD9 antigen OS=Rattus norvegicus OX=10116 GN=Cd9 PE=1 SV=2 - [CD9_RAT]	5	0.932291	1.27231	1.06432	0.538506	0.917223	1.21774	1.17236	1.15544	0.951856	1.11569	1.2e-05
Q71KM5	CRAMP (Fragment) OS=Rattus norvegicus OX=10116 PE=2 SV=1 - [Q71KM5_RAT]	4	0.549982	-0.296992	0.464404	0.280672	0.862787	1.27543	1.05404	1.21367	0.249517	1.10148	4.8e-05
D4A3E0	Multimerin 1 OS=Rattus norvegicus OX=10116 GN=Mmrn1 PE=4 SV=1 - [D4A3E0_RAT]	24	0.444437	0.169598	0.385038	0.206304	0.816965	1.17207	1.21341	1.14357	0.301344	1.08651	4.3e-05
Q8R2H2	Integrin beta OS=Rattus norvegicus OX=10116 GN=Itgb3 PE=2 SV=1 - [Q8R2H2_RAT]	13	0.429993	0.163189	0.529939	0.0994489	0.777967	1.23559	1.09137	1.18189	0.305642	1.0717	7.7e-05
Q6JE36	Protein NDRG1 OS=Rattus norvegicus OX=10116 GN=Ndrg1 PE=1 SV=1 - [NDRG1_RAT]	7	1.20242	1.50412	1.19322	1.38	1.39351	1.03467	0.960998	0.861608	1.31994	1.0627	0.000131
P01946	Hemoglobin subunit alpha-1/2 OS=Rattus norvegicus OX=10116 GN=Hba1 PE=1 SV=3 - [HBA_RAT]	2	2.4691	1.88202	1.64394	1.68061	1.17992	1.03624	0.991328	0.96216	1.91892	1.04241	5e-06
Q642B0	Glypican 4 OS=Rattus norvegicus OX=10116 GN=Gpc4 PE=1 SV=1 - [Q642B0_RAT]	9	0.600662	0.462119	1.08365	0.588885	0.799792	1.04861	1.09647	1.14986	0.683828	1.02368	3e-05
A0S5V8	Chitinase 1 OS=Rattus norvegicus OX=10116 GN=Chit1 PE=2 SV=1 - [A0S5V8_RAT]	5	0.770257	-0.198546	0.53575	0.472699	0.772591	1.09159	1.06887	1.12544	0.39504	1.01462	4.1e-05
D3ZYI0	Grancalcin OS=Rattus norvegicus OX=10116 GN=Gca PE=1 SV=2 - [D3ZYI0_RAT]	3	0.561723	-0.0339132	0.62611	-0.1005	0.595707	1.1142	1.12266	1.21669	0.263355	1.01231	0.000363
F7FF45	Nuclear mitotic apparatus protein 1 OS=Rattus norvegicus OX=10116 GN=Numa1 PE=1 SV=2 - [F7FF45_RAT]	3	0.401569	0.656485	0.757191	0.815936	0.975672	0.86472	1.06855	1.1227	0.657795	1.00791	1e-05
F1M7L9	Uncharacterized protein OS=Rattus norvegicus OX=10116 PE=1 SV=3 - [F1M7L9_RAT]	10	0.293071	0.542953	0.686151	0.678156	0.903955	1.03478	1.11904	0.961267	0.550083	1.00476	5e-06
O88752	Epsilon 1 globin OS=Rattus norvegicus OX=10116 GN=Hbe1 PE=1 SV=1 - [O88752_RAT]	7	2.15809	1.58381	1.3989	2.26818	1.41966	0.953743	0.85425	0.744668	1.85224	0.99308	0.00054
F1M957	von Willebrand factor OS=Rattus norvegicus OX=10116 GN=Vwf PE=1 SV=3 - [F1M957_RAT]	25	0.32147	0.356039	0.649249	0.16512	0.714327	1.15579	1.02829	1.06884	0.37297	0.991814	8.8e-05
O88754	Epsilon 3 globin OS=Rattus norvegicus OX=10116 GN=Hbg1 PE=2 SV=1 - [O88754_RAT]	7	2.00727	1.20326	1.02389	1.80824	1.22571	0.911312	0.923612	0.873407	1.51067	0.983509	4.7e-05
A0A0G2JVE6	Aminopeptidase OS=Rattus norvegicus OX=10116 GN=Anpep PE=1 SV=1 - [A0A0G2JVE6_RAT]	2	-0.679967	-0.233711	1.10825	1.21677	0.981	0.963287	0.939672	1.03766	0.352835	0.980405	<0.000001
A0A0G2JT89	Prominin 1 OS=Rattus norvegicus OX=10116 GN=Prom1 PE=4 SV=1 - [A0A0G2JT89_RAT]	3	0.519614	0.020232	0.681603	0.664331	0.832011	0.975706	0.940156	1.09035	0.471445	0.959555	9e-06
F1M065	Junctional adhesion molecule 2 OS=Rattus norvegicus OX=10116 GN=Jam2 PE=1 SV=3 - [F1M065_RAT]	2	-0.021164	0.726808	0.854481	0.774744	0.875553	0.852943	0.649451	1.45048	0.583717	0.957107	0.001117
F1LW61	Hypothetical protein LOC691189 OS=Rattus norvegicus OX=10116 GN=LOC691189 PE=4 SV=3 - [F1LW61_RAT]	2	0.719965	0.643346	0.841702	0.512733	0.72642	1.0344	1.03229	1.01789	0.679437	0.952748	3.4e-05
Q7TQ70	Ac1873 OS=Rattus norvegicus OX=10116 GN=Fga PE=1 SV=1 - [Q7TQ70_RAT]	36	0.719842	0.27535	0.398264	0.618678	0.84875	0.997987	0.984766	0.943281	0.503033	0.943696	2e-06
Q6PCU4	Emd protein OS=Rattus norvegicus OX=10116 GN=Emd PE=1 SV=1 - [Q6PCU4_RAT]	9	0.691092	0.80214	0.745471	0.73695	0.954596	0.989247	0.981826	0.835121	0.743913	0.940197	2e-06
E3W9F8	Laminin, alpha 1 OS=Rattus norvegicus OX=10116 GN=Lama1 PE=2 SV=1 - [E3W9F8_RAT]	6	0.772399	0.487521	0.754113	0.783004	0.89212	0.904774	0.860012	1.09266	0.699259	0.937392	9e-06
F1M8E9	Lysozyme OS=Rattus norvegicus OX=10116 GN=Lyz2 PE=1 SV=1 - [F1M8E9_RAT]	3	0.27437	-0.358891	0.798025	0.114858	0.570074	1.03697	1.05135	1.0221	0.207091	0.920123	0.000253
F1M861	Uncharacterized protein OS=Rattus norvegicus OX=10116 PE=4 SV=3 - [F1M861_RAT]	3	1.05756	-0.271591	0.119542	0.563706	0.974614	1.08691	0.889232	0.711116	0.367304	0.915468	5.4e-05
P02680	Fibrinogen gamma chain OS=Rattus norvegicus OX=10116 GN=Fgg PE=1 SV=3 - [FIBG_RAT]	22	0.533589	0.10834	0.33181	0.423678	0.827123	0.951176	0.906108	0.946396	0.349354	0.907701	1e-06
Q9JHZ9	Sodium-coupled neutral amino acid transporter 3 OS=Rattus norvegicus OX=10116 GN=Slc38a3 PE=2 SV=1 - [S38A3_RAT]	7	1.05648	1.53927	1.13769	1.17359	1.00766	0.848374	0.836449	0.916047	1.22676	0.902134	3e-06
D4A545	Mast cell-expressed membrane protein 1 OS=Rattus norvegicus OX=10116 GN=Mcemp1 PE=4 SV=1 - [D4A545_RAT]	4	0.303212	-0.269066	0.596296	0.220742	0.591674	0.955799	1.02843	1.01909	0.212796	0.898746	0.000174
A0A0G2JZ75	Plasmalemma vesicle-associated protein OS=Rattus norvegicus OX=10116 GN=Plvap PE=4 SV=1 - [A0A0G2JZ75_RAT]	6	0.379777	0.287443	0.906365	0.569885	0.634468	0.996208	0.974362	0.977191	0.535868	0.895557	8.8e-05
G3V9N9	alpha-1,2-Mannosidase OS=Rattus norvegicus OX=10116 GN=Man1a1 PE=1 SV=1 - [G3V9N9_RAT]	8	0.610266	0.181775	0.522404	0.378349	0.692686	0.920561	0.979333	0.987771	0.423198	0.895088	3.4e-05
A0A096MK61	Cartilage-associated protein-like 1 OS=Rattus norvegicus OX=10116 GN=Crtapl1 PE=1 SV=1 - [A0A096MK61_RAT]	7	0.701645	0.602564	0.85008	0.37285	0.759033	0.967621	0.886375	0.965964	0.631785	0.894748	9e-06
Q8R4A1	ERO1-like protein alpha OS=Rattus norvegicus OX=10116 GN=Ero1a PE=1 SV=1 - [ERO1A_RAT]	5	2.48332	2.036	2.41605	1.62494	0.964302	0.772263	0.805296	0.994707	2.14007	0.884142	1.3e-05
Q4KLH6	Centrosomal protein of 162 kDa OS=Rattus norvegicus OX=10116 GN=Cep162 PE=1 SV=2 - [CE162_RAT]	3	0.403258	1.16154	-0.275667	0.233518	0.830567	0.898123	0.77474	1.00181	0.380663	0.876311	9e-06
Q5XIM9	T-complex protein 1 subunit beta OS=Rattus norvegicus OX=10116 GN=Cct2 PE=1 SV=3 - [TCPB_RAT]	27	0.268864	0.00496921	0.50456	0.202046	0.668188	0.950314	0.935415	0.946058	0.24511	0.874994	3.5e-05
B2GV73	Actin-related protein 2/3 complex subunit 3 OS=Rattus norvegicus OX=10116 GN=Arpc3 PE=1 SV=1 - [B2GV73_RAT]	3	0.394932	0.31245	0.556357	0.545039	0.745278	0.941634	0.970671	0.833768	0.452195	0.872838	1e-05
P57756	Ficolin-2 OS=Rattus norvegicus OX=10116 GN=Fcn2 PE=2 SV=1 - [FCN2_RAT]	8	0.326036	-0.0971116	0.175069	0.22744	0.702718	0.953564	0.955556	0.877662	0.157858	0.872375	2.1e-05
G3V9P3	Platelet receptor Gi24 OS=Rattus norvegicus OX=10116 GN=Vsir PE=1 SV=2 - [G3V9P3_RAT]	3	0.594734	0.434566	0.899567	0.494425	0.767719	0.809803	0.803145	1.07013	0.605823	0.862699	3.9e-05
Q3MHS9	Chaperonin containing Tcp1, subunit 6A (Zeta 1) OS=Rattus norvegicus OX=10116 GN=Cct6a PE=1 SV=1 - [Q3MHS9_RAT]	24	0.158601	0.102857	0.491294	0.236573	0.664241	0.926961	0.900878	0.95248	0.247331	0.86114	3.5e-05
D4ABF0	Endoplasmic reticulum protein SC65 OS=Rattus norvegicus OX=10116 GN=P3h4 PE=4 SV=1 - [D4ABF0_RAT]	4	0.479554	-0.0787701	0.316326	0.416664	0.722432	0.879374	0.976506	0.858807	0.283443	0.85928	1.4e-05
P14480	Fibrinogen beta chain OS=Rattus norvegicus OX=10116 GN=Fgb PE=1 SV=4 - [FIBB_RAT]	30	0.414027	0.0507476	0.208189	0.315057	0.678299	0.945809	0.901512	0.90266	0.247005	0.85707	2.2e-05
P54921	Alpha-soluble NSF attachment protein OS=Rattus norvegicus OX=10116 GN=Napa PE=1 SV=2 - [SNAA_RAT]	13	0.799386	0.606092	0.821179	0.948276	0.875377	0.84452	0.856907	0.848302	0.793733	0.856276	<0.000001
F1MAN8	Laminin subunit alpha 5 OS=Rattus norvegicus OX=10116 GN=Lama5 PE=1 SV=2 - [F1MAN8_RAT]	43	0.179296	-0.114098	0.541335	0.2656	0.627163	0.979223	0.93211	0.885898	0.218033	0.856098	6.3e-05
D3ZTJ0	Protein XRP2 OS=Rattus norvegicus OX=10116 GN=Rp2 PE=1 SV=3 - [D3ZTJ0_RAT]	4	0.594666	0.479145	0.956078	0.634113	0.769097	0.944798	0.828458	0.871875	0.666	0.853557	3e-06
D3ZKW6	Uroplakin 3B OS=Rattus norvegicus OX=10116 GN=Upk3b PE=2 SV=1 - [D3ZKW6_RAT]	2	-0.249584	0.0450338	0.437061	0.237557	0.619414	0.921176	0.904284	0.961683	0.117517	0.851639	6.4e-05
Q62745	CD81 antigen OS=Rattus norvegicus OX=10116 GN=Cd81 PE=1 SV=1 - [CD81_RAT]	2	0.105403	-0.201379	0.866196	0.382319	0.68246	0.91371	0.930868	0.844538	0.288135	0.842894	1.9e-05
F1LNT8	Vesicle-associated membrane protein 8 OS=Rattus norvegicus OX=10116 GN=Vamp8 PE=1 SV=2 - [F1LNT8_RAT]	2	0.423111	0.471857	0.392088	0.453994	0.784991	0.899985	1.00045	0.680312	0.435263	0.841434	4.4e-05
Q3B8N9	Biphenyl hydrolase-like OS=Rattus norvegicus OX=10116 GN=Bphl PE=1 SV=1 - [Q3B8N9_RAT]	5	0.398003	0.0666455	0.715067	0.0190473	0.56003	0.907964	1.01334	0.881555	0.299691	0.840722	0.000173
A0A0G2K3W2	Coagulation factor V OS=Rattus norvegicus OX=10116 GN=F5 PE=1 SV=1 - [A0A0G2K3W2_RAT]	19	0.473715	0.162164	0.352321	0.261978	0.648729	0.929694	0.976736	0.794571	0.312544	0.837433	5.8e-05
F1M5V2	GLI pathogenesis-related 2 OS=Rattus norvegicus OX=10116 GN=Glipr2 PE=1 SV=3 - [F1M5V2_RAT]	7	-0.124316	0.132311	-0.0178653	0.0737892	0.621041	0.931272	0.858097	0.933291	0.0159799	0.835925	5.6e-05
Q63135	Complement component receptor 1-like protein OS=Rattus norvegicus OX=10116 GN=Cr1l PE=1 SV=1 - [CR1L_RAT]	8	0.760204	0.573086	0.840168	0.715858	0.818431	0.889749	0.793182	0.833679	0.722329	0.83376	<0.000001
B5DFB0	Leprecan-like 2 (Predicted), isoform CRA_b OS=Rattus norvegicus OX=10116 GN=P3h3 PE=2 SV=1 - [B5DFB0_RAT]	4	-0.20356	-0.386338	0.0891733	-0.0734049	0.603125	0.969455	0.859056	0.848342	-0.143532	0.819995	7.7e-05
A0A0G2K7Q1	Phospholipid scramblase OS=Rattus norvegicus OX=10116 GN=Plscr1 PE=3 SV=1 - [A0A0G2K7Q1_RAT]	2	0.381129	0.284025	0.561698	0.198998	0.625776	0.878655	0.887201	0.883733	0.356462	0.818841	3.3e-05
D3ZJH9	Malic enzyme OS=Rattus norvegicus OX=10116 GN=Me2 PE=1 SV=1 - [D3ZJH9_RAT]	15	0.685679	0.274212	0.939406	0.547717	0.695714	0.879069	0.86725	0.831934	0.611753	0.818491	6e-06
H9BFG4	Interleukin-6 receptor subunit beta OS=Rattus norvegicus OX=10116 GN=Il6st PE=2 SV=2 - [H9BFG4_RAT]	11	0.834723	0.673223	1.02915	1.09541	0.817808	0.849324	0.787973	0.791983	0.908126	0.811772	<0.000001
Q6IN10	Endothelin converting enzyme 1, isoform CRA_a OS=Rattus norvegicus OX=10116 GN=Ece1 PE=1 SV=1 - [Q6IN10_RAT]	18	0.772139	0.578347	1.05587	0.685286	0.671784	0.868133	0.871383	0.832673	0.77291	0.810993	1.1e-05
D3ZCH9	CD177 molecule OS=Rattus norvegicus OX=10116 GN=Cd177 PE=4 SV=2 - [D3ZCH9_RAT]	6	0.334069	-0.137066	0.570976	-0.0391198	0.442995	0.936526	0.871448	0.990029	0.182215	0.810249	0.000604
F1LY38	CWC22 spliceosome-associated protein homolog OS=Rattus norvegicus OX=10116 GN=Cwc22 PE=1 SV=3 - [F1LY38_RAT]	4	0.19816	0.396616	0.473794	0.255376	0.701556	0.943538	0.831505	0.762265	0.330986	0.809716	1.5e-05
B2GUY0	Endoplasmic reticulum mannosyl-oligosaccharide 1,2-alpha-mannosidase OS=Rattus norvegicus OX=10116 GN=Man1b1 PE=2 SV=2 - [MA1B1_RAT]	7	0.0317629	0.258855	0.504813	-0.305546	0.43497	0.939653	0.856603	1.0048	0.122471	0.809008	0.000679
F1M1R8	Uncharacterized protein OS=Rattus norvegicus OX=10116 PE=1 SV=3 - [F1M1R8_RAT]	3	-0.146099	-0.392364	-0.194612	0.119992	0.838784	0.765626	0.905604	0.716533	-0.153271	0.806637	6e-06
D3ZM19	Ecotropic viral integration site 2B OS=Rattus norvegicus OX=10116 GN=Evi2b PE=1 SV=1 - [D3ZM19_RAT]	3	0.68583	0.0077523	0.528791	0.446334	0.71368	0.806178	0.853868	0.850424	0.417177	0.806038	3e-06
B5DFA0	Vil1 protein OS=Rattus norvegicus OX=10116 GN=Vil1 PE=1 SV=1 - [B5DFA0_RAT]	15	0.874163	0.940868	0.64007	0.773709	0.862259	0.784854	0.807455	0.765227	0.807203	0.804949	<0.000001
D3ZT26	Similar to TatD DNase domain containing 2 OS=Rattus norvegicus OX=10116 GN=Tatdn2 PE=4 SV=1 - [D3ZT26_RAT]	2	0.85554	0.778738	0.0632505	0.466246	0.637149	0.689996	0.939519	0.948022	0.540944	0.803671	9.7e-05
G3V7R2	Peptidoglycan-recognition protein OS=Rattus norvegicus OX=10116 GN=Pglyrp1 PE=1 SV=1 - [G3V7R2_RAT]	5	0.610038	-0.449861	0.491233	0.331387	0.584275	0.905416	0.87835	0.845251	0.245699	0.803323	7.4e-05
D3ZMI6	Olfactomedin 4 OS=Rattus norvegicus OX=10116 GN=Olfm4 PE=4 SV=1 - [D3ZMI6_RAT]	13	0.864385	0.109087	0.880145	0.638346	0.666682	0.910152	0.868969	0.763124	0.622991	0.802232	1.9e-05
Q4G055	RNA-binding protein 40 OS=Rattus norvegicus OX=10116 GN=Rnpc3 PE=1 SV=2 - [RBM40_RAT]	3	0.295671	0.0763653	0.168328	0.30585	0.806496	1.01559	0.950142	0.434754	0.211554	0.801745	0.000761
Q4V8I7	Volume-regulated anion channel subunit LRRC8A OS=Rattus norvegicus OX=10116 GN=Lrrc8a PE=1 SV=1 - [LRC8A_RAT]	2	0.433176	0.890947	0.78209	0.0153284	0.575271	0.860477	0.92537	0.836741	0.530385	0.799465	7.7e-05
Q95571	RT1.A(U) alpha chain (Fragment) OS=Rattus norvegicus OX=10116 GN=RT1.A(u) PE=2 SV=1 - [Q95571_RAT]	3	0.443271	0.254881	0.904521	0.457107	0.717181	0.73198	0.732505	1.01308	0.514945	0.798686	5.8e-05
Q4KM65	Cleavage and polyadenylation specificity factor subunit 5 OS=Rattus norvegicus OX=10116 GN=Nudt21 PE=2 SV=1 - [CPSF5_RAT]	9	0.00309042	-0.112372	-0.0248807	-0.0338595	0.541773	0.796428	0.894639	0.953289	-0.0420055	0.796532	0.000158
A0A0G2JV77	Misshapen-like kinase 1 OS=Rattus norvegicus OX=10116 GN=Mink1 PE=1 SV=1 - [A0A0G2JV77_RAT]	3	0.868222	0.162226	0.357219	0.283782	0.747948	0.926041	0.934786	0.568054	0.417862	0.794207	0.000129
B5DEI0	Pcyox1l protein OS=Rattus norvegicus OX=10116 GN=Pcyox1l PE=2 SV=1 - [B5DEI0_RAT]	3	0.713433	0.226555	0.785822	0.33049	0.649975	0.758306	0.78748	0.968236	0.514075	0.790999	4.5e-05
G3V7V4	Ectonucleotide pyrophosphatase/phosphodiesterase family member 1 OS=Rattus norvegicus OX=10116 GN=Enpp1 PE=1 SV=3 - [G3V7V4_RAT]	6	0.392166	0.21831	0.530759	0.645613	0.667414	0.813744	0.883633	0.795983	0.446712	0.790193	9e-06
Q6P7Q6	Galectin OS=Rattus norvegicus OX=10116 GN=Lgals9 PE=1 SV=1 - [Q6P7Q6_RAT]	7	0.471755	0.183629	0.764125	0.354218	0.605646	0.927844	0.858576	0.767072	0.443432	0.789785	5.4e-05
B1WBY9	LOC688318 protein OS=Rattus norvegicus OX=10116 GN=Lrrc45 PE=2 SV=1 - [B1WBY9_RAT]	3	0.849387	0.233035	0.340768	0.656562	0.39421	0.711992	1.0288	1.02354	0.519938	0.789635	0.001513
A0A0A0MXX1	A-kinase anchor protein 7 isoforms delta and gamma OS=Rattus norvegicus OX=10116 GN=Akap7 PE=4 SV=1 - [A0A0A0MXX1_RAT]	2	0.919946	0.869874	1.27167	0.984174	0.817383	0.700039	0.728465	0.901975	1.01142	0.786965	1e-05
A0A0G2K2S2	Solute carrier family 2, facilitated glucose transporter member 1 OS=Rattus norvegicus OX=10116 GN=Slc2a1 PE=1 SV=1 - [A0A0G2K2S2_RAT]	3	0.871899	1.67177	1.33991	1.12766	0.812026	0.762905	0.717469	0.814603	1.25281	0.776751	<0.000001
D3ZF44	Similar to stefin A2 OS=Rattus norvegicus OX=10116 GN=LOC689230 PE=4 SV=1 - [D3ZF44_RAT]	3	1.04045	0.153847	0.289439	0.60421	0.769363	0.892323	0.789787	0.646603	0.521986	0.774519	1.5e-05
Q9JJ49	Titin (Fragment) OS=Rattus norvegicus OX=10116 PE=2 SV=1 - [Q9JJ49_RAT]	7	-0.618893	1.47789	0.297008	-0.240417	0.568586	0.8501	0.901856	0.773635	0.228897	0.773544	7.2e-05
Q9EQ25	Sodium-coupled neutral amino acid transporter 4 OS=Rattus norvegicus OX=10116 GN=Slc38a4 PE=1 SV=1 - [S38A4_RAT]	2	0.0809666	-0.0260238	0.179095	0.352147	0.669592	0.8374	0.849118	0.722521	0.146546	0.769658	1e-05
D4ACB8	Chaperonin subunit 8 (Theta) (Predicted), isoform CRA_a OS=Rattus norvegicus OX=10116 GN=Cct8 PE=1 SV=1 - [D4ACB8_RAT]	31	0.18675	0.076821	0.497327	0.295233	0.586844	0.851317	0.82881	0.807372	0.264033	0.768586	3.5e-05
D3ZA45	Autophagy-related protein 13 OS=Rattus norvegicus OX=10116 GN=Atg13 PE=1 SV=2 - [D3ZA45_RAT]	2	0.0251331	0.442948	0.937853	0.467317	0.816592	0.966442	0.685135	0.599966	0.468313	0.767034	0.000111
Q68FQ0	T-complex protein 1 subunit epsilon OS=Rattus norvegicus OX=10116 GN=Cct5 PE=1 SV=1 - [TCPE_RAT]	31	0.124838	-0.0112066	0.417566	0.304606	0.590963	0.834144	0.815145	0.815282	0.208951	0.763883	3.1e-05
P51868	Calsequestrin-2 OS=Rattus norvegicus OX=10116 GN=Casq2 PE=1 SV=2 - [CASQ2_RAT]	10	-0.504596	1.21798	0.348521	0.00251679	0.700704	0.755311	0.855745	0.742671	0.266106	0.763608	4e-06
Q6AYG2	DnaJ (Hsp40) homolog, subfamily C, member 28 OS=Rattus norvegicus OX=10116 GN=Dnajc28 PE=2 SV=1 - [Q6AYG2_RAT]	2	0.32589	-0.00359645	0.944151	0.633351	0.528502	0.613446	0.821394	1.08155	0.474949	0.761224	0.000716
A0A0G2JX94	Angiomotin OS=Rattus norvegicus OX=10116 GN=Amot PE=4 SV=1 - [A0A0G2JX94_RAT]	8	0.326676	0.285181	0.514793	0.972776	0.845394	0.754342	0.65014	0.793898	0.524856	0.760944	9e-06
A0A0G2K5P1	Hepatocyte nuclear factor 4-alpha OS=Rattus norvegicus OX=10116 GN=Hnf4a PE=1 SV=1 - [A0A0G2K5P1_RAT]	2	0.949638	0.227398	0.781102	0.478317	0.742584	0.769052	0.760595	0.770306	0.609114	0.760634	<0.000001
Q5RK27	Solute carrier family 12 member 7 OS=Rattus norvegicus OX=10116 GN=Slc12a7 PE=2 SV=2 - [S12A7_RAT]	3	0.478579	0.44603	0.588914	1.20612	0.715752	0.68668	0.734964	0.904133	0.679911	0.760382	1.4e-05
D3ZH14	Transmembrane and coiled-coil domain family 1 OS=Rattus norvegicus OX=10116 GN=Tmcc1 PE=1 SV=1 - [D3ZH14_RAT]	2	0.434336	0.673341	0.801674	0.328595	0.718359	0.938332	0.653782	0.728807	0.559486	0.75982	4.3e-05
Q71DI1	Dermcidin OS=Rattus norvegicus OX=10116 PE=2 SV=1 - [Q71DI1_RAT]	3	0.83874	1.541	1.51417	0.755393	0.549098	0.411285	0.44974	1.61912	1.16232	0.757311	0.019801
D3ZG74	Fras1-related extracellular matrix protein 2 OS=Rattus norvegicus OX=10116 GN=Frem2 PE=4 SV=2 - [D3ZG74_RAT]	55	0.270922	0.0898561	0.583609	0.114587	0.52931	0.829248	0.787087	0.874939	0.264744	0.755146	9.8e-05
Q62714	Neutrophil antibiotic peptide NP-4 OS=Rattus norvegicus OX=10116 GN=Np4 PE=1 SV=1 - [DEF4_RAT]	3	0.296026	-0.0828077	0.0763171	0.189966	0.580356	0.857785	0.847399	0.733057	0.119875	0.754649	5.2e-05
G3V817	X-ray repair cross-complementing protein 5 OS=Rattus norvegicus OX=10116 GN=Xrcc5 PE=1 SV=1 - [G3V817_RAT]	4	0.269048	0.0971401	0.474232	0.331612	0.715621	0.719797	0.758698	0.824373	0.293008	0.754622	1e-06
O55006	Protein RoBo-1 OS=Rattus norvegicus OX=10116 PE=1 SV=1 - [ROB1_RAT]	4	0.498613	-0.1737	0.395922	0.378452	0.638539	0.891739	0.823778	0.662656	0.274822	0.754178	4e-05
P70582	Nuclear pore complex protein Nup54 OS=Rattus norvegicus OX=10116 GN=Nup54 PE=1 SV=1 - [NUP54_RAT]	10	-0.0510103	-0.193751	0.561771	0.677979	0.676757	0.775204	0.787769	0.774244	0.248747	0.753494	1e-06
Q4PP99	Cardiac troponin C OS=Rattus norvegicus OX=10116 GN=Tnnc1 PE=2 SV=1 - [Q4PP99_RAT]	6	-0.642756	1.46751	0.234388	-0.0228512	0.625557	0.86849	0.706658	0.811666	0.259072	0.753093	2.2e-05
F1LUW0	Uncharacterized protein OS=Rattus norvegicus OX=10116 PE=4 SV=2 - [F1LUW0_RAT]	2	0.54619	0.940849	0.679721	0.525398	0.7362	0.744235	0.673162	0.837933	0.67304	0.747882	5e-06
A0A0G2JSJ3	Solute carrier family 2 (Facilitated glucose transporter), member 3 OS=Rattus norvegicus OX=10116 GN=Slc2a3 PE=1 SV=1 - [A0A0G2JSJ3_RAT]	5	0.358477	0.337639	0.221739	-0.712794	0.361521	0.956407	0.854669	0.81681	0.0512652	0.747352	0.00106
A0A0G2JUV7	Centrosomal protein 85 OS=Rattus norvegicus OX=10116 GN=Cep85 PE=1 SV=1 - [A0A0G2JUV7_RAT]	2	0.6771	0.300304	0.239493	0.85101	0.932754	0.872634	0.599689	0.582745	0.516977	0.746955	0.000209
D3Z8M3	KH and NYN domain-containing OS=Rattus norvegicus OX=10116 GN=Khnyn PE=1 SV=1 - [D3Z8M3_RAT]	2	0.876324	0.40812	0.593095	0.58413	0.55484	0.701755	0.839249	0.891332	0.615417	0.746794	0.000102
Q5I0E1	Leucine-rich alpha-2-glycoprotein 1 OS=Rattus norvegicus OX=10116 GN=Lrg1 PE=2 SV=1 - [Q5I0E1_RAT]	5	0.712393	-0.423479	0.450927	0.169252	0.510978	0.957928	0.873818	0.629817	0.227273	0.743135	0.00039
Q5XI80	SP100 nuclear antigen OS=Rattus norvegicus OX=10116 GN=Sp100 PE=2 SV=1 - [Q5XI80_RAT]	3	0.0929917	-0.0769941	0.752363	0.931203	0.881627	0.738589	0.78947	0.559752	0.424891	0.742359	6.2e-05
D3ZE26	Similar to RIKEN cDNA 1110063G11 (Predicted) OS=Rattus norvegicus OX=10116 GN=Tmcc2 PE=1 SV=1 - [D3ZE26_RAT]	6	0.966352	0.404482	0.764173	0.992	0.823653	0.681572	0.706715	0.742565	0.781752	0.738626	3e-06
Q5RJZ3	Tetraspanin (Fragment) OS=Rattus norvegicus OX=10116 GN=Tspan6 PE=2 SV=1 - [Q5RJZ3_RAT]	4	0.14082	0.131245	0.298054	0.256259	0.62918	0.742677	0.775054	0.801397	0.206595	0.737077	7e-06
P20762	Ig gamma-2C chain C region OS=Rattus norvegicus OX=10116 PE=2 SV=1 - [IGG2C_RAT]	4	0.628036	-0.056779	0.2624	0.246651	0.488075	0.911548	0.750692	0.792371	0.270077	0.735671	0.000201
P62747	Rho-related GTP-binding protein RhoB OS=Rattus norvegicus OX=10116 GN=Rhob PE=1 SV=1 - [RHOB_RAT]	2	0.0806272	0.835589	0.657057	0.545614	0.839568	0.797499	0.681202	0.615826	0.529722	0.733524	2.2e-05
Q5BJY9	Keratin, type I cytoskeletal 18 OS=Rattus norvegicus OX=10116 GN=Krt18 PE=1 SV=3 - [K1C18_RAT]	39	0.536689	0.292173	0.397332	0.30387	0.584853	0.779928	0.799783	0.754374	0.382516	0.729735	2.1e-05
Q6IMX7	Hsp70-binding protein 1 OS=Rattus norvegicus OX=10116 GN=Hspbp1 PE=1 SV=1 - [HPBP1_RAT]	2	0.941997	0.459078	0.760406	0.614652	0.704014	0.745528	0.714194	0.754487	0.694033	0.729556	<0.000001
C0JPT7	Filamin A OS=Rattus norvegicus OX=10116 GN=Flna PE=1 SV=1 - [C0JPT7_RAT]	111	-0.154777	-0.130632	0.0266731	-0.206775	0.457507	0.855658	0.791922	0.809131	-0.116378	0.728554	0.000235
P17246	Transforming growth factor beta-1 OS=Rattus norvegicus OX=10116 GN=Tgfb1 PE=1 SV=1 - [TGFB1_RAT]	5	0.562631	-0.0969149	0.355446	0.350175	0.579682	0.717582	0.745159	0.866129	0.292834	0.727138	4.1e-05
D3ZTT7	Sad1 and UNC84 domain-containing 2 OS=Rattus norvegicus OX=10116 GN=Sun2 PE=1 SV=1 - [D3ZTT7_RAT]	15	0.071859	0.0126599	0.589634	0.06643	0.463579	0.763199	0.868048	0.787271	0.185146	0.720524	0.000233
Q9R175	Interferon-induced transmembrane protein 2 OS=Rattus norvegicus OX=10116 GN=Ifitm2 PE=1 SV=1 - [Q9R175_RAT]	2	0.413629	0.47767	0.802356	0.650429	0.615794	0.731509	0.866972	0.665325	0.586021	0.7199	2.9e-05
Q6AYQ9	Peptidyl-prolyl cis-trans isomerase OS=Rattus norvegicus OX=10116 GN=Ppic PE=1 SV=1 - [Q6AYQ9_RAT]	6	0.118215	-0.253405	0.320631	0.285185	0.571436	0.809858	0.728543	0.765197	0.117656	0.718758	2.6e-05
Q4FZR5	Adrenocortical dysplasia protein homolog OS=Rattus norvegicus OX=10116 GN=Acd PE=1 SV=1 - [ACD_RAT]	2	0.58199	0.209125	0.823474	0.634728	0.659648	0.851612	0.631184	0.732011	0.562329	0.718614	2e-05
D3ZAE6	RCG49849 OS=Rattus norvegicus OX=10116 GN=Vasn PE=1 SV=1 - [D3ZAE6_RAT]	3	0.0945174	0.176455	0.178232	0.248284	0.555482	0.748576	0.779143	0.790674	0.174372	0.718469	2.9e-05
F1M790	Prostaglandin F2 receptor negative regulator OS=Rattus norvegicus OX=10116 GN=Ptgfrn PE=1 SV=3 - [F1M790_RAT]	13	-0.0255405	-0.256738	0.106157	-0.16909	0.377883	0.822701	0.863152	0.803392	-0.0863029	0.716782	0.000634
O55158	Tetraspanin OS=Rattus norvegicus OX=10116 GN=Tspan8 PE=2 SV=2 - [O55158_RAT]	2	0.8864	-0.503073	-0.119285	0	0.606767	0.741717	0.755754	0.760445	0.0660104	0.716171	6e-06
A0A0G2KAL6	Colony-stimulating factor 2 receptor alpha subunit OS=Rattus norvegicus OX=10116 GN=Csf2ra PE=1 SV=1 - [A0A0G2KAL6_RAT]	7	0.613314	0.303514	1.02084	0.462193	0.44899	0.822942	0.816131	0.764637	0.599966	0.713175	0.000232
D3ZUL3	Collagen type VI alpha 1 chain OS=Rattus norvegicus OX=10116 GN=Col6a1 PE=1 SV=1 - [D3ZUL3_RAT]	29	-0.442935	-0.392498	-0.0788478	-0.500395	0.30857	0.846324	0.805062	0.891896	-0.353669	0.712963	0.001429
A0A0G2K6U1	Vesicle-fusing ATPase OS=Rattus norvegicus OX=10116 GN=Nsf PE=1 SV=1 - [A0A0G2K6U1_RAT]	31	0.524499	0.776849	0.986912	0.595187	0.646198	0.712919	0.779538	0.706325	0.720862	0.711245	2e-06
B2RYD0	Ube2g2 protein OS=Rattus norvegicus OX=10116 GN=Ube2g2 PE=1 SV=1 - [B2RYD0_RAT]	3	1.08567	0.663809	0.979723	0.634083	0.620943	0.778823	0.555226	0.885481	0.840821	0.710118	0.000116
D3ZI66	Ring finger protein 149 OS=Rattus norvegicus OX=10116 GN=Rnf149 PE=1 SV=1 - [D3ZI66_RAT]	3	1.22185	0.816643	1.40207	0.668437	0.552584	0.619348	0.859018	0.805339	1.02725	0.709072	0.000111
A0A0F7R5I4	Alanine/serine/cysteine/threonine transporter 1 OS=Rattus norvegicus OX=10116 GN=ratASCT1 PE=2 SV=1 - [A0A0F7R5I4_RAT]	5	1.02326	1.65504	1.35383	1.20153	0.836444	0.719452	0.670045	0.608257	1.30841	0.70855	2e-05
P05370	Glucose-6-phosphate 1-dehydrogenase OS=Rattus norvegicus OX=10116 GN=G6pdx PE=1 SV=3 - [G6PD_RAT]	13	0.269581	0.411014	0.292963	-0.0796345	0.437532	0.814805	0.81413	0.755708	0.223481	0.705544	0.000248
B2RYB8	Integrin beta OS=Rattus norvegicus OX=10116 GN=Itgb2 PE=1 SV=1 - [B2RYB8_RAT]	19	0.328344	-0.114576	0.396197	-0.0407084	0.393806	0.818734	0.771778	0.827783	0.142314	0.703025	0.000514
Q7TPB1	T-complex protein 1 subunit delta OS=Rattus norvegicus OX=10116 GN=Cct4 PE=1 SV=3 - [TCPD_RAT]	24	0.0492257	-0.024313	0.281772	0.0144916	0.506057	0.770143	0.753461	0.779252	0.080294	0.702228	6.5e-05
D3ZIT3	Ninein-like OS=Rattus norvegicus OX=10116 GN=LOC100911256 PE=1 SV=3 - [D3ZIT3_RAT]	2	0.62566	-0.293631	-0.208294	0.531947	0.769784	0.47787	0.800023	0.758858	0.163921	0.701634	0.000119
Q9Z2Q7	Syntaxin-8 OS=Rattus norvegicus OX=10116 GN=Stx8 PE=1 SV=1 - [STX8_RAT]	7	0.220613	0.458209	0.348593	0.127285	0.592454	0.76434	0.755202	0.685206	0.288675	0.6993	1e-05
Q32KJ6	N-acetylgalactosamine-6-sulfatase OS=Rattus norvegicus OX=10116 GN=Galns PE=1 SV=1 - [GALNS_RAT]	8	1.10181	0.30009	0.534875	0.513616	0.57017	0.767487	0.791926	0.663893	0.612599	0.698369	2.7e-05
A0A140TAB8	Tyrosine-protein kinase receptor OS=Rattus norvegicus OX=10116 GN=Igf1r PE=3 SV=1 - [A0A140TAB8_RAT]	3	0.303939	0.679595	1.09511	0.645006	0.485217	0.662923	0.921087	0.72358	0.680912	0.698202	0.000255
G3V712	Keratin complex 2, basic, gene 7, isoform CRA_a OS=Rattus norvegicus OX=10116 GN=Krt7 PE=1 SV=1 - [G3V712_RAT]	17	0.183668	-0.321421	0.0143991	0.160182	0.536104	0.797441	0.761022	0.697933	0.00920694	0.698125	4.1e-05
P97829	Leukocyte surface antigen CD47 OS=Rattus norvegicus OX=10116 GN=Cd47 PE=1 SV=1 - [CD47_RAT]	4	0.375992	0.538817	0.662779	0.337501	0.56228	0.786274	0.77309	0.670707	0.478772	0.698088	3e-05
Q10758	Keratin, type II cytoskeletal 8 OS=Rattus norvegicus OX=10116 GN=Krt8 PE=1 SV=3 - [K2C8_RAT]	41	0.41998	0.275728	0.284712	0.256724	0.573747	0.758224	0.730967	0.728984	0.309286	0.69798	1.4e-05
A0A0G2JTT6	HECT and RLD domain-containing E3 ubiquitin protein ligase family member 1 OS=Rattus norvegicus OX=10116 GN=Herc1 PE=1 SV=1 - [A0A0G2JTT6_RAT]	5	-2.39218	4.79749	-0.0285807	-0.31156	0.645986	0.826177	0.723334	0.594319	0.516292	0.697454	2.7e-05
D3ZYK8	Matrix metallopeptidase 9 OS=Rattus norvegicus OX=10116 GN=Mmp9 PE=3 SV=1 - [D3ZYK8_RAT]	10	0.478203	-0.353655	0.250341	-0.169826	0.314043	0.841516	0.86811	0.764484	0.0512657	0.697038	0.00135
Q5GAM3	Ribonuclease 16 OS=Rattus norvegicus OX=10116 GN=LOC100361814 PE=3 SV=1 - [Q5GAM3_RAT]	6	0.36354	-0.0371351	-0.254297	-0.246039	0.682467	0.966289	0.324779	0.809958	-0.0434826	0.695874	0.001731
D4A9X9	Centromere protein K OS=Rattus norvegicus OX=10116 GN=Cenpk PE=4 SV=1 - [D4A9X9_RAT]	2	0.697607	-0.426085	0.652464	0.749541	0.597079	0.643717	0.667785	0.874765	0.418382	0.695836	5.1e-05
Q4V7D9	Acid sphingomyelinase-like phosphodiesterase OS=Rattus norvegicus OX=10116 GN=Smpdl3b PE=2 SV=1 - [Q4V7D9_RAT]	7	0.659875	0.128358	0.459028	0.374393	0.601145	0.773629	0.721372	0.668112	0.405413	0.691065	7e-06
P60711	Actin, cytoplasmic 1 OS=Rattus norvegicus OX=10116 GN=Actb PE=1 SV=1 - [ACTB_RAT]	8	0.373958	0.196857	0.701291	0.4153	0.555195	0.713083	0.728886	0.764612	0.421852	0.690444	1.6e-05
D3ZF49	Transmembrane serine protease 6 OS=Rattus norvegicus OX=10116 GN=Tmprss6 PE=1 SV=1 - [D3ZF49_RAT]	2	1.06091	0.503669	0.683352	0.601784	0.513739	0.844627	0.631095	0.768154	0.712428	0.689404	0.000122
F1LNH3	Collagen type VI alpha 2 chain OS=Rattus norvegicus OX=10116 GN=Col6a2 PE=1 SV=2 - [F1LNH3_RAT]	21	-0.422876	-0.429247	-0.0780308	-0.555137	0.264568	0.873638	0.848039	0.771253	-0.371323	0.689374	0.002132
A0A0G2K6V6	Kinesin family member 16B OS=Rattus norvegicus OX=10116 GN=Kif16b PE=3 SV=1 - [A0A0G2K6V6_RAT]	2	1.39391	1.11927	0.994015	0.590923	0.575332	0.663683	0.667498	0.841062	1.02453	0.686894	3.7e-05
D3ZZM0	Solute carrier family 39 (Zinc transporter), member 14 (Predicted) OS=Rattus norvegicus OX=10116 GN=Slc39a14 PE=1 SV=1 - [D3ZZM0_RAT]	4	0.342393	0.747364	0.464981	0.360315	0.510837	0.747614	0.696183	0.780253	0.478763	0.683722	5.7e-05
Q63118	Calcitonin gene-related peptide type 1 receptor OS=Rattus norvegicus OX=10116 GN=Calcrl PE=2 SV=1 - [CALRL_RAT]	2	1.58599	2.11252	2.02549	1.60188	0.679578	0.636409	0.644029	0.773209	1.83147	0.683306	4e-06
D4ABR5	Upstream transcription factor family member 3 OS=Rattus norvegicus OX=10116 GN=Usf3 PE=4 SV=3 - [D4ABR5_RAT]	2	-0.0612188	0.849677	0.424329	0.286189	0.663383	0.715447	0.650323	0.700211	0.374744	0.682341	<0.000001
D4AC23	Chaperonin-containing TCP1 subunit 7 OS=Rattus norvegicus OX=10116 GN=Cct7 PE=1 SV=1 - [D4AC23_RAT]	29	-0.323595	0.038631	0.389034	-0.156242	0.403106	0.7738	0.805816	0.734817	-0.0130428	0.679385	0.000371
Q6P136	Hyou1 protein OS=Rattus norvegicus OX=10116 GN=Hyou1 PE=1 SV=1 - [Q6P136_RAT]	2	0.738444	0.903436	1.07945	1.00781	0.702335	0.686691	0.660807	0.66041	0.932285	0.677561	<0.000001
B5DEG1	Integrin subunit alpha 8 OS=Rattus norvegicus OX=10116 GN=Itga8 PE=1 SV=1 - [B5DEG1_RAT]	4	0.260873	0.125179	0.361649	0.167723	0.538766	0.830807	0.706836	0.631595	0.228856	0.677001	6.3e-05
B2RYM6	Zc3hc1 protein OS=Rattus norvegicus OX=10116 GN=Zc3hc1 PE=1 SV=1 - [B2RYM6_RAT]	6	0.229797	-0.0461992	0.355115	0.542973	0.649266	0.741108	0.697983	0.612956	0.270421	0.675328	3e-06
A0A0G2KA61	Casein kinase II subunit beta OS=Rattus norvegicus OX=10116 GN=Csnk2b PE=1 SV=1 - [A0A0G2KA61_RAT]	5	0.356833	0.224522	0.434248	0.68715	0.774717	0.660828	0.635619	0.628345	0.425689	0.674877	5e-06
Q63803	Guanine nucleotide-binding protein G(s) subunit alpha isoforms XLas OS=Rattus norvegicus OX=10116 GN=Gnas PE=1 SV=3 - [GNAS1_RAT]	6	0.0668999	0.484014	0.628342	0.221979	0.573926	0.758385	0.721016	0.644057	0.350309	0.674346	1.4e-05
E0X583	Stabilin-2/HARE OS=Rattus norvegicus OX=10116 GN=Stab2 PE=2 SV=2 - [E0X583_RAT]	26	0.669894	0.959323	1.23734	0.682595	0.590275	0.761084	0.662781	0.683171	0.887287	0.674328	7e-06
Q07936	Annexin A2 OS=Rattus norvegicus OX=10116 GN=Anxa2 PE=1 SV=2 - [ANXA2_RAT]	28	0.279635	0.0452437	0.392846	0.00273961	0.418923	0.761182	0.729057	0.774205	0.180116	0.670841	0.000236
Q64244	ADP-ribosyl cyclase/cyclic ADP-ribose hydrolase 1 OS=Rattus norvegicus OX=10116 GN=Cd38 PE=1 SV=1 - [CD38_RAT]	3	0.840508	0.581472	0.95115	0.55896	0.451039	0.792524	0.64914	0.790165	0.733022	0.670717	0.000199
D3ZYT6	Triggering receptor-expressed on myeloid cells-like 1 OS=Rattus norvegicus OX=10116 GN=Treml1 PE=1 SV=3 - [D3ZYT6_RAT]	5	0.525547	0.268784	-0.1257	0.105748	0.465351	0.74391	0.601447	0.868044	0.193595	0.669688	0.000271
P23347	Anion exchange protein 2 OS=Rattus norvegicus OX=10116 GN=Slc4a2 PE=1 SV=1 - [B3A2_RAT]	4	0.871439	0.466123	0.42144	-0.00731049	0.612958	0.74942	0.681408	0.631059	0.437923	0.668711	5e-06
M0R402	Thioredoxin-related transmembrane protein 3 OS=Rattus norvegicus OX=10116 GN=Tmx3 PE=1 SV=2 - [M0R402_RAT]	5	0.26938	0.27849	0.739882	0.170816	0.350719	0.874083	0.817659	0.620231	0.364642	0.665673	0.001063
A0A0G2K8N3	Prolyl 3-hydroxylase 2 OS=Rattus norvegicus OX=10116 GN=P3h2 PE=1 SV=1 - [A0A0G2K8N3_RAT]	4	0.677244	0.967129	1.12701	0.902996	0.832691	0.695052	0.631487	0.491356	0.918594	0.662646	0.000122
A0A0A0MY09	Endoplasmin OS=Rattus norvegicus OX=10116 GN=Hsp90b1 PE=1 SV=1 - [A0A0A0MY09_RAT]	51	1.03106	0.897394	1.04877	1.07695	0.74158	0.61603	0.616387	0.676016	1.01354	0.662503	3e-06
G3V8C3	Vimentin OS=Rattus norvegicus OX=10116 GN=Vim PE=1 SV=1 - [G3V8C3_RAT]	38	0.00514718	-0.141511	0.335496	0.435164	0.569956	0.689537	0.700763	0.684446	0.158574	0.661176	4e-06
F1M661	BMP-binding endothelial regulator OS=Rattus norvegicus OX=10116 GN=Bmper PE=4 SV=2 - [F1M661_RAT]	2	0.77211	-0.132634	-0.176481	0.0548316	0.491311	0.608665	0.719948	0.823329	0.129457	0.660813	0.000125
A0A0G2JU29	Arachidonate 5-lipoxygenase OS=Rattus norvegicus OX=10116 GN=Alox5 PE=3 SV=1 - [A0A0G2JU29_RAT]	4	-0.457533	-0.399682	0.260013	-0.686634	0.322723	0.945428	0.622786	0.748459	-0.320959	0.659849	0.00177
B2RZB3	Eva-1 homolog B OS=Rattus norvegicus OX=10116 GN=Eva1b PE=1 SV=1 - [B2RZB3_RAT]	2	0.460085	0.327631	0.677368	0.435352	0.614193	0.580246	0.706298	0.733993	0.475109	0.658683	9e-06
B0BNN0	Tissue-specific transplantation antigen P35B OS=Rattus norvegicus OX=10116 GN=Tsta3 PE=1 SV=1 - [B0BNN0_RAT]	3	1.10582	0.729592	0.908917	0.103086	0.464174	0.745397	0.812142	0.611803	0.711854	0.658379	0.00019
D3ZCG9	Integrin alpha 3 variant A OS=Rattus norvegicus OX=10116 GN=Itga3 PE=2 SV=1 - [D3ZCG9_RAT]	5	0.134376	-0.130382	0.418219	0.481611	0.660297	0.741129	0.588309	0.640338	0.225956	0.657518	5e-06
Q52KJ9	Thioredoxin domain containing 1 OS=Rattus norvegicus OX=10116 GN=Tmx1 PE=1 SV=1 - [Q52KJ9_RAT]	9	-0.0544309	0.498144	0.345511	0.0718122	0.485663	0.790591	0.758316	0.591967	0.215259	0.656634	0.000128
M0RA19	Endoglin OS=Rattus norvegicus OX=10116 GN=Eng PE=1 SV=2 - [M0RA19_RAT]	9	0.540448	0.349993	0.675023	0.487988	0.585446	0.726507	0.705445	0.607953	0.513363	0.656338	7e-06
A1L108	Actin-related protein 2/3 complex subunit 5-like protein OS=Rattus norvegicus OX=10116 GN=Arpc5l PE=1 SV=2 - [ARP5L_RAT]	6	0.32249	-0.00911532	0.517238	0.366744	0.402619	0.723617	0.733476	0.760235	0.299339	0.654987	0.000276
D3ZKG5	Parvin, beta OS=Rattus norvegicus OX=10116 GN=Parvb PE=1 SV=1 - [D3ZKG5_RAT]	3	0.723812	0.861365	0.598249	0.0424354	0.450692	0.919844	0.556837	0.685386	0.556465	0.65319	0.000587
G3V852	RCG55135, isoform CRA_b OS=Rattus norvegicus OX=10116 GN=Tln1 PE=1 SV=1 - [G3V852_RAT]	75	0.370743	0.0941726	0.167009	0.129345	0.523224	0.71637	0.714344	0.655303	0.190317	0.65231	2.3e-05
F8WFG6	Scavenger receptor class B member 1 OS=Rattus norvegicus OX=10116 GN=Scarb1 PE=1 SV=2 - [F8WFG6_RAT]	11	0.66139	0.425124	0.568495	0.115387	0.42785	0.779429	0.718599	0.675718	0.442599	0.650399	0.000185
Q63377	Sodium/potassium-transporting ATPase subunit beta-3 OS=Rattus norvegicus OX=10116 GN=Atp1b3 PE=2 SV=1 - [AT1B3_RAT]	3	-0.0924802	0.341249	0.656457	0.0203219	0.385079	0.82661	0.723461	0.664511	0.231387	0.649915	0.000435
Q5M9F3	Ribosomal RNA processing 1 homolog (S. cerevisiae) OS=Rattus norvegicus OX=10116 GN=Rrp1 PE=1 SV=1 - [Q5M9F3_RAT]	2	-0.135202	-0.308924	0.0912808	0.0778734	0.421633	0.597647	0.784704	0.790878	-0.0687431	0.648715	0.000329
Q5XI73	Rho GDP-dissociation inhibitor 1 OS=Rattus norvegicus OX=10116 GN=Arhgdia PE=1 SV=1 - [GDIR1_RAT]	7	1.26979	0.688209	0.632521	0.731563	0.679175	0.678988	0.545661	0.685022	0.83052	0.647211	7e-06
Q9ET61	Complement component C1q receptor OS=Rattus norvegicus OX=10116 GN=Cd93 PE=1 SV=1 - [C1QR1_RAT]	5	0.438766	0.313475	0.419438	0.201074	0.479809	0.749703	0.718231	0.633079	0.343188	0.645206	7.2e-05
A0A0G2JSK5	Integrin beta OS=Rattus norvegicus OX=10116 GN=Itgb1 PE=1 SV=1 - [A0A0G2JSK5_RAT]	22	0.546863	0.321143	0.806253	0.505692	0.523407	0.708537	0.665368	0.682511	0.544988	0.644956	1.7e-05
P17425	Hydroxymethylglutaryl-CoA synthase, cytoplasmic OS=Rattus norvegicus OX=10116 GN=Hmgcs1 PE=1 SV=1 - [HMCS1_RAT]	7	1.16711	1.27817	1.00955	1.09569	0.72014	0.681689	0.582199	0.593993	1.13763	0.644505	8e-06
Q6AYQ1	Golgin subfamily A member 7 OS=Rattus norvegicus OX=10116 GN=Golga7 PE=2 SV=1 - [GOGA7_RAT]	2	0.225006	0.371559	0.322486	-0.113576	0.419243	0.661329	0.793616	0.701005	0.201369	0.643798	0.000221
Q4V8C2	Centromere/kinetochore protein zw10 homolog OS=Rattus norvegicus OX=10116 GN=Zw10 PE=2 SV=3 - [ZW10_RAT]	9	0.40212	0.341218	0.636881	0.225407	0.476635	0.724554	0.686286	0.684675	0.401407	0.643038	4.9e-05
A0A0G2K1A2	Myeloperoxidase OS=Rattus norvegicus OX=10116 GN=Mpo PE=1 SV=1 - [A0A0G2K1A2_RAT]	8	0.427658	-0.355297	0.263145	0.301847	0.521111	0.73211	0.601006	0.717687	0.159338	0.642979	3.5e-05
F1M589	Promyelocytic leukemia OS=Rattus norvegicus OX=10116 GN=Pml PE=1 SV=3 - [F1M589_RAT]	14	-0.119143	-0.134945	0.270214	0.283663	0.501663	0.563189	0.739924	0.756456	0.0749472	0.640308	9.7e-05
P07314	Glutathione hydrolase 1 proenzyme OS=Rattus norvegicus OX=10116 GN=Ggt1 PE=1 SV=4 - [GGT1_RAT]	11	0.576153	0.125231	0.680862	0.0980867	0.372365	0.724419	0.70605	0.755118	0.370083	0.639488	0.000407
D4A678	Spectrin, alpha, erythrocytic 1 OS=Rattus norvegicus OX=10116 GN=Spta1 PE=1 SV=3 - [D4A678_RAT]	62	1.22933	0.446896	0.782066	1.14367	0.751694	0.597056	0.597883	0.606265	0.900489	0.638225	1e-05
G3V7V8	Phosphodiesterase OS=Rattus norvegicus OX=10116 GN=Pde5a PE=1 SV=1 - [G3V7V8_RAT]	2	0.889202	0.331985	-0.248359	-0.186423	0.427231	0.776163	0.736722	0.605344	0.196601	0.636365	0.000223
Q5U3Z5	BRI3-binding protein OS=Rattus norvegicus OX=10116 GN=Bri3bp PE=1 SV=1 - [Q5U3Z5_RAT]	3	0.0310889	0.242268	0.281214	0.154776	0.528004	0.759199	0.704018	0.552525	0.177337	0.635936	5.8e-05
P04937	Fibronectin OS=Rattus norvegicus OX=10116 GN=Fn1 PE=1 SV=2 - [FINC_RAT]	3	0.613107	0.35695	0.891671	1.02766	0.710291	0.677662	0.523198	0.631626	0.722346	0.635694	1.7e-05
Q91YC0	NAD(P)(+)--arginine ADP-ribosyltransferase (Fragment) OS=Rattus norvegicus OX=10116 GN=ART3 PE=2 SV=1 - [Q91YC0_RAT]	2	-2.04994	3.88063	-0.061538	-0.656775	0.435347	0.75109	0.616526	0.726356	0.278094	0.63233	0.000147
B1H249	Glucosamine-phosphate N-acetyltransferase 1 OS=Rattus norvegicus OX=10116 GN=Gnpnat1 PE=1 SV=1 - [B1H249_RAT]	4	1.18143	0.967787	0.929517	1.02868	0.854948	0.623907	0.522409	0.525694	1.02685	0.631739	0.000212
A0A1W2Q680	H/ACA ribonucleoprotein complex subunit (Fragment) OS=Rattus norvegicus OX=10116 GN=Gar1 PE=1 SV=1 - [A0A1W2Q680_RAT]	5	0.118423	0.0283335	0.586442	0.622441	0.719147	0.650039	0.541661	0.616092	0.33891	0.631735	1.1e-05
Q62931	Golgi SNAP receptor complex member 1 OS=Rattus norvegicus OX=10116 GN=Gosr1 PE=1 SV=1 - [GOSR1_RAT]	7	0.742147	0.606695	0.642572	0.480557	0.551375	0.65429	0.708024	0.606854	0.617993	0.630136	8e-06
G3V7W1	Programmed cell death protein 6 OS=Rattus norvegicus OX=10116 GN=Pdcd6 PE=2 SV=1 - [PDCD6_RAT]	4	0.666173	0.0994344	0.774979	0.080698	0.329076	0.762388	0.719519	0.708493	0.405321	0.629869	0.000676
Q5M7T6	V-type proton ATPase subunit OS=Rattus norvegicus OX=10116 GN=Atp6v0d1 PE=1 SV=1 - [Q5M7T6_RAT]	8	0.862269	0.46201	0.921594	0.525064	0.530457	0.688155	0.611694	0.686958	0.692734	0.629316	1.3e-05
G3V679	Transferrin receptor protein 1 OS=Rattus norvegicus OX=10116 GN=Tfrc PE=1 SV=1 - [G3V679_RAT]	16	0.503303	0.644837	0.683162	0.295281	0.488965	0.652762	0.698278	0.67494	0.531646	0.628736	2.9e-05
G3V686	Resistin-like gamma OS=Rattus norvegicus OX=10116 GN=Retnlg PE=2 SV=1 - [RETNG_RAT]	2	-0.057226	-0.311493	0.145663	0.303513	0.669033	0.788806	0.433627	0.604623	0.0201143	0.624022	0.000204
D3ZP13	Sulfhydryl oxidase OS=Rattus norvegicus OX=10116 GN=Qsox2 PE=1 SV=1 - [D3ZP13_RAT]	2	0.436726	0.474752	0.29277	0.162984	0.53692	0.579715	0.729693	0.647267	0.341808	0.623399	1.8e-05
D4A7U8	Myozenin 1 OS=Rattus norvegicus OX=10116 GN=Myoz1 PE=1 SV=1 - [D4A7U8_RAT]	11	-0.417195	1.75817	0.184553	-0.0914836	0.541677	0.722391	0.688527	0.540738	0.35851	0.623333	3.2e-05
O35394	Prenylated Rab acceptor protein 1 OS=Rattus norvegicus OX=10116 GN=Rabac1 PE=1 SV=1 - [PRAF1_RAT]	2	0.0525241	0.448161	0.311978	0.183584	0.622123	0.688131	0.605416	0.571116	0.249062	0.621696	3e-06
Q6P502	T-complex protein 1 subunit gamma OS=Rattus norvegicus OX=10116 GN=Cct3 PE=1 SV=1 - [TCPG_RAT]	28	-0.300203	-0.0799465	0.136672	-0.204701	0.388757	0.72201	0.712268	0.657057	-0.112044	0.620023	0.00024
D4A005	Euchromatic histone lysine methyltransferase 1 OS=Rattus norvegicus OX=10116 GN=Ehmt1 PE=1 SV=3 - [D4A005_RAT]	7	0.31135	0.224743	0.674452	0.710855	0.633319	0.543962	0.634463	0.664767	0.48035	0.619128	3e-06
F1LRH4	Laminin subunit gamma 2 OS=Rattus norvegicus OX=10116 GN=Lamc2 PE=4 SV=1 - [F1LRH4_RAT]	2	0.0408681	-0.207414	0.335216	0.238226	0.578992	0.627325	0.666898	0.580765	0.101724	0.613495	2e-06
Q642E6	Tripeptidyl peptidase I OS=Rattus norvegicus OX=10116 GN=Tpp1 PE=1 SV=1 - [Q642E6_RAT]	3	0.385658	0.110139	0.489704	0.233021	0.465665	0.71791	0.685856	0.582622	0.30463	0.613013	6.8e-05
Q5U1Z2	Trafficking protein particle complex subunit 3 OS=Rattus norvegicus OX=10116 GN=Trappc3 PE=2 SV=1 - [TPPC3_RAT]	3	0.725249	0.130055	0.296163	0.0268323	0.374383	0.716655	0.657783	0.698582	0.294575	0.611851	0.000314
D3ZY96	Neutrophilic granule protein OS=Rattus norvegicus OX=10116 GN=Ngp PE=1 SV=1 - [D3ZY96_RAT]	13	-0.0483142	-0.604648	0.10876	-0.161363	0.330684	0.712048	0.721426	0.676988	-0.176391	0.610287	0.000577
F1LWG8	Sarcalumenin OS=Rattus norvegicus OX=10116 GN=Srl PE=1 SV=3 - [F1LWG8_RAT]	16	-0.41411	0.911877	0.225283	-0.305394	0.423224	0.612643	0.73869	0.66386	0.104414	0.609604	0.000148
A0A0G2JUB0	Protein FAM3C OS=Rattus norvegicus OX=10116 GN=Fam3c PE=1 SV=1 - [A0A0G2JUB0_RAT]	7	0.22173	0.232504	0.196771	0.169408	0.461238	0.680084	0.62569	0.668728	0.205103	0.608935	4.6e-05
F1M3Q1	Interferon-induced transmembrane protein 1 OS=Rattus norvegicus OX=10116 GN=Ifitm1 PE=4 SV=2 - [F1M3Q1_RAT]	2	0.664766	1.12845	1.13773	0.775015	0.629579	0.647968	0.617537	0.540529	0.92649	0.608903	3e-06
A0A0G2JYP3	Similar to swan OS=Rattus norvegicus OX=10116 GN=LOC679087 PE=4 SV=1 - [A0A0G2JYP3_RAT]	4	0.149328	0.367621	0.20149	0.284217	0.48831	0.672443	0.621511	0.646878	0.250664	0.607286	1.8e-05
A0A0G2JYL4	Prolyl 4-hydroxylase subunit alpha 2 OS=Rattus norvegicus OX=10116 GN=P4ha2 PE=1 SV=1 - [A0A0G2JYL4_RAT]	9	0.481776	0.412287	0.624113	0.364925	0.504136	0.711163	0.61325	0.594573	0.470775	0.60578	2.4e-05
Q3B8P1	Ctdsp1 protein (Fragment) OS=Rattus norvegicus OX=10116 GN=Ctdsp1 PE=2 SV=1 - [Q3B8P1_RAT]	2	0.412759	0.22055	0.573403	0.336525	0.371779	0.571546	0.686916	0.790277	0.385809	0.605129	0.000512
Q63921	Prostaglandin G/H synthase 1 OS=Rattus norvegicus OX=10116 GN=Ptgs1 PE=2 SV=2 - [PGH1_RAT]	4	0.683999	0.68128	1.18405	0.458208	0.50253	0.77278	0.570165	0.573017	0.751883	0.604623	8.1e-05
F1M121	PML-RARA-regulated adaptor molecule 1 OS=Rattus norvegicus OX=10116 GN=Pram1 PE=4 SV=3 - [F1M121_RAT]	2	0.550627	0.0538324	0.206145	0.249367	0.420664	0.726706	0.655827	0.61123	0.264993	0.603607	0.000136
A0A0G2KB00	Fras1-related extracellular matrix 1 OS=Rattus norvegicus OX=10116 GN=Frem1 PE=4 SV=1 - [A0A0G2KB00_RAT]	10	0.199742	-0.115124	0.279215	0.37646	0.447052	0.633761	0.689372	0.641792	0.185074	0.602994	5.4e-05
Q9QX71	Napsin OS=Rattus norvegicus OX=10116 GN=Napsa PE=1 SV=1 - [Q9QX71_RAT]	2	0.250056	-0.0830673	0.344335	-0.123476	0.349572	0.628268	0.77162	0.662292	0.0969621	0.602938	0.000498
O88807	Protein-arginine deiminase type-4 OS=Rattus norvegicus OX=10116 GN=Padi4 PE=2 SV=1 - [PADI4_RAT]	4	-0.0259962	-0.0699713	0.111168	-0.12577	0.335054	0.74951	0.555073	0.771189	-0.0276425	0.602706	0.000793
B0BN74	Bag2 protein OS=Rattus norvegicus OX=10116 GN=Bag2 PE=2 SV=1 - [B0BN74_RAT]	7	0.296956	0.561302	0.416293	0.556348	0.549084	0.632486	0.642946	0.585001	0.457725	0.602379	1e-06
D4A1B9	Structural maintenance of chromosomes protein OS=Rattus norvegicus OX=10116 GN=Smc3 PE=1 SV=1 - [D4A1B9_RAT]	40	-0.069061	0.111581	0.422886	0.245959	0.492022	0.653317	0.641484	0.621959	0.177841	0.602195	1.4e-05
P08033	Gap junction beta-1 protein OS=Rattus norvegicus OX=10116 GN=Gjb1 PE=1 SV=1 - [CXB1_RAT]	6	-0.215711	-0.0218768	0.129809	0.0669178	0.405488	0.687793	0.703453	0.611222	-0.0102151	0.601989	0.000146
B2RZ47	Exosc5 protein (Fragment) OS=Rattus norvegicus OX=10116 GN=Exosc5 PE=2 SV=1 - [B2RZ47_RAT]	2	0.282115	0.27623	0.0558035	0.038039	0.467572	0.67944	0.671194	0.588941	0.163047	0.601787	3.9e-05
D3ZMQ3	Integrin subunit alpha 4 OS=Rattus norvegicus OX=10116 GN=Itga4 PE=1 SV=1 - [D3ZMQ3_RAT]	6	0.393039	-0.0998756	0.319232	0.7353	0.70814	0.600534	0.599201	0.498699	0.336924	0.601644	2.3e-05
Q68FQ2	Junctional adhesion molecule C OS=Rattus norvegicus OX=10116 GN=Jam3 PE=1 SV=1 - [JAM3_RAT]	2	0.463727	0.445576	0.504731	0.349385	0.540227	0.661377	0.658726	0.543656	0.440855	0.600996	1e-05
A0A0G2KB82	CCR4-NOT transcription complex, subunit 2 OS=Rattus norvegicus OX=10116 GN=Cnot2 PE=1 SV=1 - [A0A0G2KB82_RAT]	2	0.978315	0.638855	0.459775	1.03278	0.892312	0.476898	0.418606	0.610037	0.777432	0.599463	0.000982
G3V8I4	Syntaxin 4A (Placental), isoform CRA_a OS=Rattus norvegicus OX=10116 GN=Stx4 PE=1 SV=1 - [G3V8I4_RAT]	6	0.307303	0.195587	0.554607	0.197399	0.463386	0.661408	0.673245	0.598241	0.313724	0.59907	4e-05
Q45QK8	Guanine nucleotide-binding protein subunit gamma (Fragment) OS=Rattus norvegicus OX=10116 GN=Gng5 PE=2 SV=1 - [Q45QK8_RAT]	3	0.378543	0.114992	0.642466	0.633413	0.547103	0.611287	0.655381	0.582326	0.442353	0.599024	2e-06
P62489	DNA-directed RNA polymerase II subunit RPB7 OS=Rattus norvegicus OX=10116 GN=Polr2g PE=2 SV=1 - [RPB7_RAT]	2	0.0559087	0.0460077	0.406869	0.321709	0.311332	0.579358	0.844717	0.658412	0.207624	0.598455	0.001258
Q4KLJ2	Integral membrane protein 2A OS=Rattus norvegicus OX=10116 GN=Itm2a PE=2 SV=1 - [Q4KLJ2_RAT]	5	-0.70646	-0.400829	-0.27843	-0.383183	0.34181	0.680302	0.698783	0.672184	-0.442225	0.59827	0.000436
Q5RK08	Glioblastoma amplified sequence OS=Rattus norvegicus OX=10116 GN=Nipsnap2 PE=1 SV=1 - [Q5RK08_RAT]	6	-0.310323	0.432584	0.340521	-0.000981755	0.272344	0.556623	0.781745	0.778741	0.11545	0.597363	0.001845
F1LQQ8	Beta-glucuronidase OS=Rattus norvegicus OX=10116 GN=Gusb PE=1 SV=2 - [F1LQQ8_RAT]	10	0.799589	0.0406333	0.692346	0.375217	0.469968	0.677919	0.628701	0.612251	0.476946	0.59721	2.9e-05
G3V667	Integrin subunit alpha 6 OS=Rattus norvegicus OX=10116 GN=Itga6 PE=1 SV=1 - [G3V667_RAT]	19	0.365193	0.0582527	0.516329	0.347813	0.4376	0.662629	0.700969	0.583256	0.321897	0.596114	8e-05
P0C0A9	Small VCP/p97-interacting protein OS=Rattus norvegicus OX=10116 GN=Svip PE=1 SV=1 - [SVIP_RAT]	2	0.363309	0.27852	0.605668	0.623905	0.408105	0.621933	0.78591	0.567707	0.46785	0.595914	0.000288
B2RZ12	IMP3, U3 small nucleolar ribonucleoprotein OS=Rattus norvegicus OX=10116 GN=Imp3 PE=1 SV=1 - [B2RZ12_RAT]	3	-0.0969378	-0.134043	0.556847	0.222574	0.408396	0.714002	0.638455	0.622278	0.13711	0.595783	0.00013
D3ZRX9	Calponin (Fragment) OS=Rattus norvegicus OX=10116 GN=Cnn2 PE=1 SV=3 - [D3ZRX9_RAT]	4	0.345388	0.091443	0.150733	0.365135	0.544332	0.583229	0.567775	0.682534	0.238175	0.594468	7e-06
Q4KLF8	Actin-related protein 2/3 complex subunit 5 OS=Rattus norvegicus OX=10116 GN=Arpc5 PE=1 SV=3 - [ARPC5_RAT]	8	0.463635	-0.0275037	0.437554	0.348577	0.424241	0.631033	0.668266	0.652844	0.305566	0.594096	8.6e-05
Q5U367	Procollagen-lysine,2-oxoglutarate 5-dioxygenase 3 OS=Rattus norvegicus OX=10116 GN=Plod3 PE=2 SV=1 - [PLOD3_RAT]	11	0.360809	0.485741	0.415045	0.488696	0.533167	0.492068	0.66276	0.680498	0.437573	0.592123	3.7e-05
Q9R0A8	HAUS augmin-like complex subunit 1 OS=Rattus norvegicus OX=10116 GN=Haus1 PE=2 SV=2 - [HAUS1_RAT]	2	0.576202	0.0690112	-0.0937345	0.427983	0.626799	0.643441	0.59193	0.505595	0.244865	0.591941	6e-06
O08658	Nuclear pore complex protein Nup88 OS=Rattus norvegicus OX=10116 GN=Nup88 PE=1 SV=1 - [NUP88_RAT]	7	-0.216532	-0.139353	0.295178	0.37469	0.516589	0.622897	0.642588	0.584418	0.0784958	0.591623	4e-06
Q6MG14	Nurim OS=Rattus norvegicus OX=10116 GN=Nrm PE=3 SV=1 - [NRM_RAT]	2	-0.0654811	0.249935	0.107556	-0.247134	0.308305	0.609526	0.705892	0.742265	0.0112189	0.591497	0.000794
Q5U2Y1	General transcription factor II-I OS=Rattus norvegicus OX=10116 GN=Gtf2i PE=1 SV=2 - [GTF2I_RAT]	26	0.191056	-0.0258216	0.298496	0.243093	0.409771	0.670242	0.698759	0.58647	0.176706	0.59131	0.000137
Q63058	Ash-psi OS=Rattus norvegicus OX=10116 GN=rCG_54231 PE=2 SV=1 - [Q63058_RAT]	2	0.654463	0.572504	0.226988	0.766163	0.76044	0.702359	0.626751	0.275333	0.555029	0.591221	0.00117
D4AAI2	Histocompatibility (Minor) HA-1 (Predicted), isoform CRA_b OS=Rattus norvegicus OX=10116 GN=Arhgap45 PE=1 SV=1 - [D4AAI2_RAT]	5	0.28718	0.17066	0.0275405	0.106975	0.249561	0.701602	0.674039	0.735563	0.148089	0.590191	0.001536
F1LS98	Protein kinase C OS=Rattus norvegicus OX=10116 GN=Prkca PE=1 SV=3 - [F1LS98_RAT]	7	0.28563	0.533886	0.61115	0.440789	0.549383	0.581794	0.590815	0.63743	0.467864	0.589855	1e-06
Q63942	GTP-binding protein Rab-3D OS=Rattus norvegicus OX=10116 GN=Rab3d PE=1 SV=2 - [RAB3D_RAT]	5	0.236018	0.654027	0.26364	0.0180793	0.366925	0.707916	0.579356	0.701399	0.292941	0.588899	0.000318
Q63011	Zero beta-globin (Fragment) OS=Rattus norvegicus OX=10116 PE=3 SV=1 - [Q63011_RAT]	3	0.971432	-0.0180161	-0.101524	0.104859	0.372979	0.629872	0.677719	0.671539	0.239188	0.588027	0.000234
F1LSL2	Nuclear pore complex protein Nup107 OS=Rattus norvegicus OX=10116 GN=Nup107 PE=1 SV=2 - [F1LSL2_RAT]	12	-0.329194	0.134367	0.54259	0.365492	0.600976	0.5337	0.518444	0.698764	0.178314	0.587971	2.3e-05
P18125	Cholesterol 7-alpha-monooxygenase OS=Rattus norvegicus OX=10116 GN=Cyp7a1 PE=1 SV=1 - [CP7A1_RAT]	4	-0.0968579	1.00321	0.647136	0.318842	0.446317	0.652647	0.687538	0.562384	0.468082	0.587221	6.2e-05
P55770	NHP2-like protein 1 OS=Rattus norvegicus OX=10116 GN=Snu13 PE=2 SV=4 - [NH2L1_RAT]	4	0.0889798	0.142979	0.577792	0.661907	0.593358	0.48259	0.60469	0.663412	0.367914	0.586012	1.6e-05
P29067	Beta-arrestin-2 OS=Rattus norvegicus OX=10116 GN=Arrb2 PE=1 SV=1 - [ARRB2_RAT]	3	0.0532453	0.0563614	0.242795	0.0242378	0.54037	0.563494	0.666405	0.572754	0.0941599	0.585756	6e-06
Q6XFR6	Glycophorin-C OS=Rattus norvegicus OX=10116 GN=Gypc PE=1 SV=1 - [GLPC_RAT]	2	0.180742	0.136956	0.710829	0.316503	0.175426	0.436348	0.928469	0.801859	0.336258	0.585526	0.007805
Q62713	Neutrophil antibiotic peptide NP-3A OS=Rattus norvegicus OX=10116 PE=1 SV=1 - [DEF3A_RAT]	2	0.458575	-0.323223	0.109673	0.257434	0.434146	0.6312	0.566191	0.706117	0.125615	0.584414	9.6e-05
F1LTJ5	Uncharacterized protein OS=Rattus norvegicus OX=10116 PE=1 SV=3 - [F1LTJ5_RAT]	59	0.276946	0.0248152	0.666194	0.567209	0.500659	0.613649	0.617764	0.604936	0.383791	0.584252	5e-06
A0A0G2K093	Heat shock 70 kDa protein 13 OS=Rattus norvegicus OX=10116 GN=Hspa13 PE=1 SV=1 - [A0A0G2K093_RAT]	8	0.628606	0.285709	0.689547	0.637447	0.538793	0.661934	0.572502	0.561239	0.560328	0.583617	4e-06
P04182	Ornithine aminotransferase, mitochondrial OS=Rattus norvegicus OX=10116 GN=Oat PE=1 SV=1 - [OAT_RAT]	17	1.58788	1.2512	1.5428	0.881868	0.467303	0.570596	0.606504	0.678119	1.31594	0.580631	2.9e-05
Q63081	Protein disulfide-isomerase A6 OS=Rattus norvegicus OX=10116 GN=Pdia6 PE=1 SV=2 - [PDIA6_RAT]	19	0.953087	0.740965	0.846867	0.89401	0.647949	0.587795	0.528003	0.557763	0.858732	0.580378	4e-06
P28480	T-complex protein 1 subunit alpha OS=Rattus norvegicus OX=10116 GN=Tcp1 PE=1 SV=1 - [TCPA_RAT]	24	-0.0858433	0.0581554	0.291179	-0.0376847	0.311399	0.672463	0.67445	0.663047	0.0564515	0.58034	0.00059
G3V8L7	Integrin alpha M OS=Rattus norvegicus OX=10116 GN=Itgam PE=1 SV=1 - [G3V8L7_RAT]	24	0.0635141	-0.32811	0.348406	-0.0528018	0.227845	0.690395	0.706244	0.690451	0.00775192	0.578734	0.001809
D3ZPW7	Glutathione peroxidase OS=Rattus norvegicus OX=10116 GN=Gpx8 PE=3 SV=1 - [D3ZPW7_RAT]	4	-0.43292	-0.466934	-0.0914225	-0.349964	0.25803	0.765095	0.670259	0.62057	-0.33531	0.578488	0.001473
B5DFH8	Cleavage stimulation factor, 3' pre-RNA subunit 2, tau OS=Rattus norvegicus OX=10116 GN=Cstf2t PE=2 SV=1 - [B5DFH8_RAT]	4	0.2288	0.0304201	0.182934	0.58602	0.62059	0.572098	0.58778	0.531637	0.257043	0.578027	1e-06
D3ZTC4	Coiled-coil domain-containing 88B OS=Rattus norvegicus OX=10116 GN=Ccdc88b PE=1 SV=2 - [D3ZTC4_RAT]	12	0.500755	0.292187	0.285971	0.38529	0.5161	0.589361	0.605095	0.601383	0.366051	0.577985	2e-06
B2RYQ5	Enhancer of rudimentary homolog OS=Rattus norvegicus OX=10116 GN=Erh PE=1 SV=1 - [B2RYQ5_RAT]	6	0.0464602	0.0538009	0.357464	0.776925	0.590778	0.60792	0.553526	0.556724	0.308663	0.577237	<0.000001
A0A140TAD7	JmjC domain-containing protein 8 OS=Rattus norvegicus OX=10116 GN=Jmjd8 PE=1 SV=1 - [A0A140TAD7_RAT]	3	0.833684	0.587611	0.7552	0.626888	0.509678	0.520441	0.745208	0.531707	0.700846	0.576758	9.2e-05
Q641Z8	Peflin OS=Rattus norvegicus OX=10116 GN=Pef1 PE=2 SV=1 - [PEF1_RAT]	3	0.911606	0.181193	0.781816	0.559574	0.389794	0.715813	0.556848	0.640362	0.608547	0.575704	0.000214
Q6IRF8	ATPase, H+ transporting, lysosomal accessory protein 1 OS=Rattus norvegicus OX=10116 GN=Atp6ap1 PE=1 SV=1 - [Q6IRF8_RAT]	4	0.612564	0.48126	0.859316	0.436764	0.395334	0.697184	0.735513	0.4746	0.597476	0.575658	0.000454
Q5XI42	Aldehyde dehydrogenase family 3 member B1 OS=Rattus norvegicus OX=10116 GN=Aldh3b1 PE=2 SV=1 - [AL3B1_RAT]	3	0.26866	0.4603	0.692441	-0.153448	0.428281	0.644762	0.615678	0.611873	0.316988	0.575149	4.7e-05
Q5EBA4	Nipsnap1 protein (Fragment) OS=Rattus norvegicus OX=10116 GN=Nipsnap1 PE=2 SV=1 - [Q5EBA4_RAT]	10	-0.335634	-0.134223	-0.505923	-0.754999	-0.645125	-0.560493	-0.508609	-0.586075	-0.432695	-0.575076	6e-06
G3V656	Methylphosphate-capping enzyme OS=Rattus norvegicus OX=10116 GN=LOC100910540 PE=1 SV=1 - [G3V656_RAT]	3	-0.239747	-0.247745	0.0443815	0.263578	-0.187592	-0.522243	-0.666031	-0.928373	-0.044883	-0.57606	0.005709
D3ZUD3	WAS/WASL-interacting protein family, member 2 OS=Rattus norvegicus OX=10116 GN=Wipf2 PE=1 SV=1 - [D3ZUD3_RAT]	3	-0.181083	-0.378189	-0.642445	-0.269619	-0.354527	-0.6982	-0.656288	-0.595943	-0.367834	-0.576239	0.00034
A0A0G2K747	Single-stranded DNA binding protein 1, isoform CRA_b OS=Rattus norvegicus OX=10116 GN=Ssbp1 PE=1 SV=1 - [A0A0G2K747_RAT]	8	-0.0900914	-0.257312	-0.19384	-0.171223	-0.490182	-0.583706	-0.685608	-0.546522	-0.178117	-0.576504	2.5e-05
P06757	Alcohol dehydrogenase 1 OS=Rattus norvegicus OX=10116 GN=Adh1 PE=1 SV=3 - [ADH1_RAT]	13	0.291854	-0.656276	-0.230584	-0.822449	-0.74515	-0.519215	-0.552508	-0.491705	-0.354363	-0.577144	9.9e-05
P20761	Ig gamma-2B chain C region OS=Rattus norvegicus OX=10116 GN=Igh-1a PE=1 SV=1 - [IGG2B_RAT]	5	0.463829	-0.289877	0.0919677	0.169347	-0.475957	-0.644917	-0.600774	-0.587815	0.108817	-0.577366	1.1e-05
F1M823	Intersectin-1 OS=Rattus norvegicus OX=10116 GN=Itsn1 PE=1 SV=3 - [F1M823_RAT]	20	-0.131446	-0.251835	-0.490184	-0.0899313	-0.406518	-0.609542	-0.655614	-0.639592	-0.240849	-0.577817	9e-05
Q642C0	DnaJ homolog subfamily C member 8 OS=Rattus norvegicus OX=10116 GN=Dnajc8 PE=2 SV=1 - [DNJC8_RAT]	8	-0.354507	-0.309305	-0.817603	-0.329103	-0.439081	-0.605567	-0.692162	-0.574507	-0.45263	-0.577829	6.1e-05
D3ZJZ0	RGD1563250 (Predicted), isoform CRA_a OS=Rattus norvegicus OX=10116 GN=Tmem205 PE=1 SV=1 - [D3ZJZ0_RAT]	2	-0.852959	0.0316476	-0.254983	-0.801019	-0.681826	-0.590499	-0.501225	-0.539037	-0.469329	-0.578147	1.9e-05
G3V9G4	ATP-citrate synthase OS=Rattus norvegicus OX=10116 GN=Acly PE=1 SV=1 - [G3V9G4_RAT]	26	-0.666988	-0.107012	-0.455631	-0.809952	-0.630787	-0.501325	-0.605095	-0.57761	-0.509896	-0.578704	6e-06
A0A0G2KAN1	Collagen, type I, alpha 2 OS=Rattus norvegicus OX=10116 GN=NEWGENE_621351 PE=1 SV=1 - [A0A0G2KAN1_RAT]	38	-1.18319	-1.08387	-0.897832	-1.05024	-0.761285	-0.545614	-0.511069	-0.497544	-1.05378	-0.578878	0.000113
Q66HF9	Leucine-rich repeat flightless-interacting protein 1 OS=Rattus norvegicus OX=10116 GN=Lrrfip1 PE=1 SV=1 - [LRRF1_RAT]	13	0.113228	-0.269914	-0.293996	0.0366683	-0.50778	-0.693178	-0.527928	-0.587568	-0.103503	-0.579113	2.2e-05
P83565	39S ribosomal protein L40, mitochondrial OS=Rattus norvegicus OX=10116 GN=Mrpl40 PE=1 SV=2 - [RM40_RAT]	8	0.021567	0.117714	-0.267166	-0.219315	-0.415567	-0.717088	-0.596579	-0.58767	-0.0867999	-0.579226	0.000118
F1LNX7	EARP-interacting protein OS=Rattus norvegicus OX=10116 GN=Eipr1 PE=1 SV=3 - [F1LNX7_RAT]	2	0.382373	-0.0146854	-0.0407131	-0.216949	-0.671109	-0.282593	-0.713573	-0.649966	0.0275065	-0.57931	0.000956
Q3KR59	Ubiquitin carboxyl-terminal hydrolase 10 OS=Rattus norvegicus OX=10116 GN=Usp10 PE=1 SV=1 - [UBP10_RAT]	3	-0.224592	-0.0782151	-0.512216	-0.377193	-0.520326	-0.657887	-0.426479	-0.714323	-0.298054	-0.579754	0.000141
D4A644	MAP7 domain-containing 1 OS=Rattus norvegicus OX=10116 GN=Map7d1 PE=1 SV=1 - [D4A644_RAT]	8	-0.475188	-0.391691	-0.40713	-0.338164	-0.502637	-0.630237	-0.654087	-0.532727	-0.403043	-0.579922	1.5e-05
A0A0G2K4I9	Coagulation factor XI OS=Rattus norvegicus OX=10116 GN=F11 PE=1 SV=1 - [A0A0G2K4I9_RAT]	8	0.261676	0.258531	0.50684	0.139227	-0.502777	-0.595507	-0.610968	-0.617052	0.291568	-0.581576	5e-06
P26772	10 kDa heat shock protein, mitochondrial OS=Rattus norvegicus OX=10116 GN=Hspe1 PE=1 SV=3 - [CH10_RAT]	11	0.332497	0.255477	-0.0685443	0.0999796	-0.362841	-0.641376	-0.682069	-0.640026	0.154852	-0.581578	0.000257
A0A0G2JSH9	Peroxiredoxin-2 OS=Rattus norvegicus OX=10116 GN=Prdx2 PE=1 SV=1 - [A0A0G2JSH9_RAT]	8	0.188911	-0.278352	-0.686183	-0.108936	-0.436164	-0.656017	-0.640056	-0.597739	-0.22114	-0.582494	4.9e-05
G3V996	LETM1 domain-containing 1 OS=Rattus norvegicus OX=10116 GN=Letmd1 PE=1 SV=1 - [G3V996_RAT]	2	-0.445522	0.368128	-0.387096	-0.795115	-0.664521	-0.667189	-0.499729	-0.50016	-0.314901	-0.5829	4.1e-05
Q9Z2Z8	7-dehydrocholesterol reductase OS=Rattus norvegicus OX=10116 GN=Dhcr7 PE=2 SV=1 - [DHCR7_RAT]	2	-1.0195	0.454359	-0.0905714	-0.659213	-0.516646	-0.534598	-0.708991	-0.571468	-0.328731	-0.582926	2.9e-05
Q4KM73	UMP-CMP kinase OS=Rattus norvegicus OX=10116 GN=Cmpk1 PE=1 SV=2 - [KCY_RAT]	9	0.096167	-0.133502	-0.504607	-0.236378	-0.453113	-0.628342	-0.640383	-0.612124	-0.19458	-0.583491	3.1e-05
P29314	40S ribosomal protein S9 OS=Rattus norvegicus OX=10116 GN=Rps9 PE=1 SV=4 - [RS9_RAT]	13	-0.862946	-0.105019	-0.660599	-0.942402	-0.704213	-0.544734	-0.570311	-0.515237	-0.642741	-0.583624	2.1e-05
Q63663	Guanylate-binding protein 1 OS=Rattus norvegicus OX=10116 GN=Gbp2 PE=1 SV=2 - [GBP2_RAT]	2	-0.709439	-0.301456	0.261205	-0.486737	-0.65699	-0.343555	-0.407374	-0.930589	-0.309107	-0.584627	0.003088
F1M853	Ribosome-binding protein 1 OS=Rattus norvegicus OX=10116 GN=Rrbp1 PE=1 SV=3 - [F1M853_RAT]	87	0.296882	0.0825177	-0.426461	0.102484	-0.330387	-0.643132	-0.683694	-0.683922	0.0138558	-0.585284	0.000455
F1M8V2	Ubiquitination factor E4B OS=Rattus norvegicus OX=10116 GN=Ube4b PE=1 SV=3 - [F1M8V2_RAT]	2	-0.297373	0.269134	-0.193709	-0.534116	-0.151251	-0.678355	-0.913719	-0.600755	-0.189016	-0.58602	0.006083
F1LPQ9	A-kinase anchor protein 2 OS=Rattus norvegicus OX=10116 GN=Akap2 PE=1 SV=2 - [F1LPQ9_RAT]	12	-0.575139	-0.18893	-0.295933	-0.173766	-0.405479	-0.643157	-0.638474	-0.660972	-0.308442	-0.587021	9.6e-05
F1M7G5	Sulfotransferase OS=Rattus norvegicus OX=10116 GN=Sult2a6 PE=1 SV=3 - [F1M7G5_RAT]	2	-1.49774	-1.70102	-1.45523	-2.04159	-0.851329	-0.540836	-0.573444	-0.382745	-1.6739	-0.587088	0.000821
P62083	40S ribosomal protein S7 OS=Rattus norvegicus OX=10116 GN=Rps7 PE=1 SV=1 - [RS7_RAT]	6	-0.477476	0.000201517	-0.315752	-0.12098	-0.517924	-0.580001	-0.479401	-0.775369	-0.228502	-0.588174	0.000153
M0RCX0	Pterin-4 alpha-carbinolamine dehydratase 2 OS=Rattus norvegicus OX=10116 GN=Pcbd2 PE=1 SV=1 - [M0RCX0_RAT]	3	0.0582661	-0.0518459	-0.200653	-0.132035	-0.573176	-0.717457	-0.572515	-0.491146	-0.0815668	-0.588574	4.1e-05
P08011	Microsomal glutathione S-transferase 1 OS=Rattus norvegicus OX=10116 GN=Mgst1 PE=1 SV=3 - [MGST1_RAT]	5	-1.0891	-0.243552	-0.317047	-1.05133	-0.710077	-0.509611	-0.58397	-0.553581	-0.675258	-0.58931	2.7e-05
F1M8K7	Dol-P-Man:Man(5)GlcNAc(2)-PP-Dol alpha-1,3-mannosyltransferase OS=Rattus norvegicus OX=10116 GN=Alg3 PE=4 SV=2 - [F1M8K7_RAT]	2	-1.03758	0.135236	-0.492355	-1.18734	-0.715234	-0.544864	-0.71112	-0.387789	-0.645511	-0.589751	0.000308
P07687	Epoxide hydrolase 1 OS=Rattus norvegicus OX=10116 GN=Ephx1 PE=1 SV=1 - [HYEP_RAT]	16	-1.37792	-0.133795	-0.485253	-0.920262	-0.754279	-0.528503	-0.524776	-0.554791	-0.729307	-0.590587	6.8e-05
Q63750	39S ribosomal protein L23, mitochondrial OS=Rattus norvegicus OX=10116 GN=Mrpl23 PE=2 SV=1 - [RM23_RAT]	2	-1.08467	-0.00271612	-0.361587	-0.569953	-0.211568	-0.374358	-0.671499	-1.10982	-0.504732	-0.591813	0.012972
Q9ESY8	Stau1 protein OS=Rattus norvegicus OX=10116 GN=Stau1 PE=2 SV=1 - [Q9ESY8_RAT]	9	-0.256175	-0.451474	-0.680307	-0.31374	-0.478641	-0.604782	-0.62276	-0.661825	-0.425424	-0.592002	1.7e-05
A2VCW9	Alpha-aminoadipic semialdehyde synthase, mitochondrial OS=Rattus norvegicus OX=10116 GN=Aass PE=2 SV=1 - [AASS_RAT]	16	-1.35275	-0.667274	-0.822466	-1.40985	-0.852464	-0.489004	-0.508429	-0.522186	-1.06309	-0.59302	0.000454
D4ABN8	5'-3' exoribonuclease 1 OS=Rattus norvegicus OX=10116 GN=Xrn1 PE=1 SV=2 - [D4ABN8_RAT]	2	-0.446434	-0.362357	-0.216002	0.248379	-0.358239	-0.793156	-0.607961	-0.625559	-0.194103	-0.596229	0.000502
A0A0G2K3Y9	Megakaryoblastic leukemia (Translocation) 1 (Predicted) OS=Rattus norvegicus OX=10116 GN=Mkl1 PE=1 SV=1 - [A0A0G2K3Y9_RAT]	2	-0.383752	-0.955689	-0.97703	-0.854009	-0.886225	-0.898805	-0.396497	-0.205431	-0.79262	-0.59674	0.007835
D3ZD09	Cytochrome c oxidase subunit OS=Rattus norvegicus OX=10116 GN=Cox6b1 PE=1 SV=1 - [D3ZD09_RAT]	6	-0.176062	0.166044	-0.0595493	-0.0340089	-0.430036	-0.644067	-0.66536	-0.649719	-0.025894	-0.597295	7.2e-05
P61459	Pterin-4-alpha-carbinolamine dehydratase OS=Rattus norvegicus OX=10116 GN=Pcbd1 PE=1 SV=2 - [PHS_RAT]	6	0.0862125	-0.236982	-0.320741	-0.16915	-0.499081	-0.636081	-0.634395	-0.620724	-0.160165	-0.59757	8e-06
Q9QX80	CArG-binding factor A OS=Rattus norvegicus OX=10116 GN=Hnrnpab PE=1 SV=1 - [Q9QX80_RAT]	13	-0.0271442	0.233473	-0.521702	0.0966225	-0.267016	-0.654477	-0.722699	-0.749172	-0.0546877	-0.598341	0.001304
Q498U6	DNA fragmentation factor subunit alpha OS=Rattus norvegicus OX=10116 GN=Dffa PE=1 SV=1 - [Q498U6_RAT]	2	-0.222602	0.25237	-0.28872	-0.190448	-0.443552	-0.595808	-0.603286	-0.755105	-0.11235	-0.599438	0.000131
P62832	60S ribosomal protein L23 OS=Rattus norvegicus OX=10116 GN=Rpl23 PE=2 SV=1 - [RL23_RAT]	4	-0.685366	0.382588	-0.175192	-0.178545	-0.395266	-0.669652	-0.625099	-0.710386	-0.164129	-0.600101	0.000169
Q5M9G1	Protein HEXIM1 OS=Rattus norvegicus OX=10116 GN=Hexim1 PE=1 SV=1 - [HEXI1_RAT]	5	-0.457005	-0.554877	-0.731866	-0.558828	-0.717163	-0.635456	-0.544369	-0.505046	-0.575644	-0.600508	3.7e-05
P17764	Acetyl-CoA acetyltransferase, mitochondrial OS=Rattus norvegicus OX=10116 GN=Acat1 PE=1 SV=1 - [THIL_RAT]	28	-0.472895	-0.603162	-0.518073	-0.4608	-0.549957	-0.610052	-0.635591	-0.606488	-0.513733	-0.600522	1e-06
M0R5V7	Murinoglobulin-2 OS=Rattus norvegicus OX=10116 GN=Mug2 PE=1 SV=2 - [M0R5V7_RAT]	3	0.193515	-0.028609	0.316604	0.530655	-0.262166	-0.698704	-0.692942	-0.749712	0.253041	-0.600881	0.001428
Q5PQK2	FUS RNA-binding protein OS=Rattus norvegicus OX=10116 GN=Fus PE=1 SV=1 - [Q5PQK2_RAT]	9	-0.606952	-0.217094	-0.802979	-0.169027	-0.381889	-0.614865	-0.64027	-0.77356	-0.449013	-0.602646	0.00033
F1M9A7	Acyl-coenzyme A oxidase OS=Rattus norvegicus OX=10116 GN=Acox3 PE=1 SV=2 - [F1M9A7_RAT]	13	-0.650676	-0.515791	-0.48802	-0.785695	-0.666529	-0.535573	-0.577807	-0.631312	-0.610046	-0.602805	5e-06
O88867	Kynurenine 3-monooxygenase OS=Rattus norvegicus OX=10116 GN=Kmo PE=1 SV=1 - [KMO_RAT]	3	-0.760781	-0.31283	-0.72801	-0.988342	-0.769098	-0.553657	-0.598881	-0.490779	-0.697491	-0.603104	9.2e-05
P14056	Serine/threonine-protein kinase A-Raf OS=Rattus norvegicus OX=10116 GN=Araf PE=1 SV=1 - [ARAF_RAT]	4	-0.420477	-0.366817	0.22231	-0.830382	-0.751131	-0.417437	-0.47566	-0.769633	-0.348841	-0.603465	0.000514
D3ZW08	Adenylosuccinate lyase OS=Rattus norvegicus OX=10116 GN=Adsl PE=1 SV=1 - [D3ZW08_RAT]	4	-0.370525	0.479509	-0.118108	-0.521317	-0.438351	-0.961466	-0.638567	-0.377084	-0.13261	-0.603867	0.002426
A0A0G2K6H5	Craniofacial development protein 1 OS=Rattus norvegicus OX=10116 GN=Cfdp1 PE=1 SV=1 - [A0A0G2K6H5_RAT]	3	-0.133656	-0.227523	-0.58364	0.0545967	-0.419572	-0.63014	-0.765893	-0.600246	-0.222556	-0.603962	0.000191
P27213	6-pyruvoyl tetrahydrobiopterin synthase OS=Rattus norvegicus OX=10116 GN=Pts PE=1 SV=1 - [PTPS_RAT]	3	0.185252	-0.338709	-0.423302	-0.467082	-0.531458	-0.755894	-0.496618	-0.63236	-0.26096	-0.604083	8.2e-05
P63090	Pleiotrophin OS=Rattus norvegicus OX=10116 GN=Ptn PE=1 SV=1 - [PTN_RAT]	3	-1.9121	-1.33599	-0.926356	-1.15746	-0.681556	-0.474461	-0.641661	-0.619551	-1.33298	-0.604307	3.1e-05
P14659	Heat shock-related 70 kDa protein 2 OS=Rattus norvegicus OX=10116 GN=Hspa2 PE=1 SV=2 - [HSP72_RAT]	2	-1.30585	-1.18263	-1.10597	-0.918558	-0.671422	-0.679551	-0.463459	-0.607251	-1.12825	-0.605421	4.6e-05
P06214	Delta-aminolevulinic acid dehydratase OS=Rattus norvegicus OX=10116 GN=Alad PE=1 SV=1 - [HEM2_RAT]	10	0.623962	0.0993892	-0.37769	0.116646	-0.402494	-0.622487	-0.680174	-0.717031	0.115577	-0.605547	0.000185
Q6U6G5	Zinc finger CCCH domain-containing protein 15 OS=Rattus norvegicus OX=10116 GN=Zc3h15 PE=1 SV=1 - [ZC3HF_RAT]	4	-0.340233	-0.419369	-0.935084	0.0435915	-0.312614	-0.711944	-0.668532	-0.731202	-0.412774	-0.606073	0.000758
Q6AYK3	Inositol-3-phosphate synthase 1 OS=Rattus norvegicus OX=10116 GN=Isyna1 PE=3 SV=2 - [INO1_RAT]	10	0.617441	0.103293	-0.201612	-0.1469	-0.549494	-0.61627	-0.636959	-0.624215	0.0930556	-0.606734	1e-06
O35986	Zinc finger Ran-binding domain-containing protein 2 OS=Rattus norvegicus OX=10116 GN=Zranb2 PE=1 SV=2 - [ZRAB2_RAT]	8	-0.178695	-0.111908	-0.507894	-0.220959	-0.42398	-0.661508	-0.720461	-0.622594	-0.254864	-0.607136	0.000124
P22791	Hydroxymethylglutaryl-CoA synthase, mitochondrial OS=Rattus norvegicus OX=10116 GN=Hmgcs2 PE=1 SV=1 - [HMCS2_RAT]	30	-0.693204	0.0265415	-0.399819	-0.823641	-0.700587	-0.557625	-0.580174	-0.590694	-0.472531	-0.60727	7e-06
Q5RKI9	Ribosome-recycling factor, mitochondrial OS=Rattus norvegicus OX=10116 GN=Mrrf PE=2 SV=1 - [RRFM_RAT]	4	-0.610775	-0.0367774	-0.437868	-0.191597	-0.637274	-0.698768	-0.549199	-0.546816	-0.319254	-0.608014	1.2e-05
F1M013	60S ribosomal protein L7a OS=Rattus norvegicus OX=10116 GN=Rpl7a PE=4 SV=2 - [F1M013_RAT]	8	-0.577746	0.113791	-0.321534	-0.651703	-0.575931	-0.617816	-0.636029	-0.604735	-0.359298	-0.608628	<0.000001
G3V8V6	O-acetyl-ADP-ribose deacetylase MACROD1 OS=Rattus norvegicus OX=10116 GN=Macrod1 PE=1 SV=3 - [G3V8V6_RAT]	5	-0.664047	-0.0405452	-0.483716	-0.420697	-0.506429	-0.632136	-0.658398	-0.638836	-0.402252	-0.60895	9e-06
D3ZA78	TPX2, microtubule nucleation factor OS=Rattus norvegicus OX=10116 GN=Tpx2 PE=1 SV=1 - [D3ZA78_RAT]	10	-0.458374	-0.628702	-0.515953	0.0617158	-0.233014	-0.414607	-0.873537	-0.918041	-0.385328	-0.6098	0.006793
F1LQC7	Nitric oxide synthase OS=Rattus norvegicus OX=10116 GN=Nos3 PE=1 SV=1 - [F1LQC7_RAT]	2	-0.613158	-0.322392	-0.705735	-0.0906414	-0.210409	-0.297248	-0.859384	-1.07335	-0.432982	-0.610099	0.01424
P35427	60S ribosomal protein L13a OS=Rattus norvegicus OX=10116 GN=Rpl13a PE=1 SV=2 - [RL13A_RAT]	5	-0.723352	0.352428	-0.763964	-1.11148	-0.672554	-0.560473	-0.527572	-0.680458	-0.561591	-0.610264	1.4e-05
P55006	Retinol dehydrogenase 7 OS=Rattus norvegicus OX=10116 GN=Rdh7 PE=1 SV=1 - [RDH7_RAT]	11	-1.16036	-0.628215	-0.691093	-1.34283	-0.873748	-0.452026	-0.521179	-0.594307	-0.955624	-0.610315	0.000544
D4AEH9	Amylo-1, 6-glucosidase, 4-alpha-glucanotransferase (Glycogen debranching enzyme, glycogen storage disease type III) (Predicted), isoform CRA_a OS=Rattus norvegicus OX=10116 GN=Agl PE=1 SV=1 - [D4AEH9_RAT]	14	-0.716703	-0.0121227	-0.308882	-0.748921	-0.57421	-0.637225	-0.67762	-0.553056	-0.446657	-0.610528	6e-06
Q498D8	Ring-box 1 OS=Rattus norvegicus OX=10116 GN=Rbx1 PE=1 SV=1 - [Q498D8_RAT]	2	-0.151127	-0.211118	-0.50972	-0.286741	-0.429228	-0.554912	-0.666024	-0.793322	-0.289676	-0.610871	0.000253
D3ZVD7	Keratocan OS=Rattus norvegicus OX=10116 GN=Kera PE=4 SV=1 - [D3ZVD7_RAT]	2	-0.982398	-0.661147	-0.91801	-1.38635	-0.872006	-0.394588	-0.513976	-0.664372	-0.986977	-0.611235	0.000895
D3ZPK4	Scavenger receptor cysteine-rich family member with 5 domains OS=Rattus norvegicus OX=10116 GN=Ssc5d PE=4 SV=1 - [D3ZPK4_RAT]	2	0.0509472	0	-0.538176	0	0	0	-0.640148	-1.80486	-0.121807	-0.611252	0.01384
D3ZFR7	PDZ and LIM domain 3, isoform CRA_b OS=Rattus norvegicus OX=10116 GN=Pdlim3 PE=1 SV=1 - [D3ZFR7_RAT]	3	-0.922596	0.32223	-0.0950465	0.313793	-0.384154	-0.818749	-0.537119	-0.705023	-0.0954049	-0.611261	0.000641
D3ZBH5	Lemur tyrosine kinase 2 OS=Rattus norvegicus OX=10116 GN=Lmtk2 PE=1 SV=1 - [D3ZBH5_RAT]	3	-0.0822504	-0.147407	-0.433951	-0.364687	-0.361001	-0.481496	-0.872442	-0.733831	-0.257074	-0.612192	0.001428
Q62806	Zinc finger protein 148 OS=Rattus norvegicus OX=10116 GN=Znf148 PE=1 SV=1 - [ZN148_RAT]	7	-0.398326	-0.141026	0.157301	0.0878065	-0.482254	-0.593097	-0.62314	-0.750582	-0.0735611	-0.612268	6.3e-05
D3ZYT2	Mitochondrial ribosomal protein S5 OS=Rattus norvegicus OX=10116 GN=Mrps5 PE=1 SV=1 - [D3ZYT2_RAT]	3	-0.390403	0.39144	-0.0801227	-0.460203	-0.697914	-0.62409	-0.671151	-0.467254	-0.134822	-0.615102	4.4e-05
Q91ZW1	Transcription factor A, mitochondrial OS=Rattus norvegicus OX=10116 GN=Tfam PE=2 SV=1 - [TFAM_RAT]	11	-0.545806	-0.498726	-0.126612	-0.189228	-0.490863	-0.613251	-0.676634	-0.685985	-0.340093	-0.616683	2.8e-05
Q5U4F3	Protein FAM107B OS=Rattus norvegicus OX=10116 GN=Fam107b PE=2 SV=1 - [F107B_RAT]	4	-0.445259	-0.213645	-0.600741	-0.252697	-0.396309	-0.59081	-0.716189	-0.767352	-0.378085	-0.617665	0.00031
D3ZQL7	Similar to 25 kDa brain-specific protein (P25-alpha) (Predicted), isoform CRA_a OS=Rattus norvegicus OX=10116 GN=Tppp PE=1 SV=1 - [D3ZQL7_RAT]	2	-0.336254	-0.152856	-0.562966	-0.605849	-0.529344	-0.595712	-0.766288	-0.579842	-0.414481	-0.617796	4.6e-05
P02454	Collagen alpha-1(I) chain OS=Rattus norvegicus OX=10116 GN=Col1a1 PE=1 SV=5 - [CO1A1_RAT]	46	-1.26884	-1.09445	-0.784384	-1.01327	-0.740929	-0.573627	-0.587076	-0.569842	-1.04024	-0.617869	1.8e-05
A0A0G2K2V6	Keratin, type I cytoskeletal 10 OS=Rattus norvegicus OX=10116 GN=Krt10 PE=1 SV=1 - [A0A0G2K2V6_RAT]	8	-0.248315	-0.354898	-0.249053	0.337811	-0.433449	-1.18657	-0.427057	-0.424744	-0.128614	-0.617954	0.00975
Q9ET64	Sphingomyelin phosphodiesterase 2 OS=Rattus norvegicus OX=10116 GN=Smpd2 PE=1 SV=1 - [NSMA_RAT]	2	-0.287402	-1.34782	0.0851741	-0.320197	-0.511472	-0.405725	-0.511978	-1.04682	-0.46756	-0.619	0.003396
D3ZDP2	Mitochondrial ribosomal protein L58 OS=Rattus norvegicus OX=10116 GN=Mrpl58 PE=1 SV=1 - [D3ZDP2_RAT]	5	-0.00669545	0.221025	-0.159171	-0.0133531	-0.493156	-0.644145	-0.658162	-0.681154	0.0104514	-0.619154	2.2e-05
E9PU10	Interferon gamma-inducible protein 47 OS=Rattus norvegicus OX=10116 GN=Ifi47 PE=1 SV=3 - [E9PU10_RAT]	5	-0.885877	-0.982977	-0.756344	-1.26329	-0.91827	-0.481432	-0.456002	-0.626435	-0.972122	-0.620535	0.0009
Q4FZX5	Methionine-R-sulfoxide reductase B2, mitochondrial OS=Rattus norvegicus OX=10116 GN=Msrb2 PE=2 SV=1 - [MSRB2_RAT]	6	-0.318934	-0.176233	-0.534218	-0.00458137	-0.346218	-0.674832	-0.700841	-0.761601	-0.258491	-0.620873	0.000497
P52759	2-iminobutanoate/2-iminopropanoate deaminase OS=Rattus norvegicus OX=10116 GN=Rida PE=1 SV=3 - [RIDA_RAT]	7	0.0746948	-0.399755	-0.63417	-0.44662	-0.576768	-0.66379	-0.618023	-0.624953	-0.351462	-0.620884	<0.000001
A0A0U1RRV5	Clustered mitochondria protein homolog OS=Rattus norvegicus OX=10116 GN=Cluh PE=1 SV=1 - [A0A0U1RRV5_RAT]	16	-0.28959	-0.0299748	-0.419112	-0.514709	-0.592122	-0.698113	-0.546647	-0.647839	-0.313347	-0.62118	7e-06
O35796	Complement component 1 Q subcomponent-binding protein, mitochondrial OS=Rattus norvegicus OX=10116 GN=C1qbp PE=1 SV=2 - [C1QBP_RAT]	5	0.148321	-0.0493311	-0.0974401	-0.0241067	-0.321472	-0.737239	-0.824491	-0.601709	-0.00563923	-0.621228	0.001054
D4A2D8	LSM7 homolog, U6 small nuclear RNA and mRNA degradation-associated OS=Rattus norvegicus OX=10116 GN=Lsm7 PE=1 SV=1 - [D4A2D8_RAT]	3	-0.376185	-0.237038	-0.470752	0.0564142	-0.379911	-0.657734	-0.712677	-0.734807	-0.25689	-0.621282	0.000291
D4A2H4	DENN domain-containing 3 OS=Rattus norvegicus OX=10116 GN=Dennd3 PE=4 SV=1 - [D4A2H4_RAT]	2	0.0621147	-0.0203559	0.0263863	-0.185088	-0.382864	-0.445822	-0.857716	-0.80102	-0.0292357	-0.621856	0.001577
F1LQH2	Nuclear factor NF-kappa-B p105 subunit OS=Rattus norvegicus OX=10116 GN=Nfkb1 PE=1 SV=2 - [F1LQH2_RAT]	3	-0.478391	-1.34658	0.0604485	-0.704856	-0.0431942	-0.759256	-0.304062	-1.38241	-0.617346	-0.622229	0.036861
B0BN46	Glyoxylate and hydroxypyruvate reductase OS=Rattus norvegicus OX=10116 GN=Grhpr PE=1 SV=1 - [B0BN46_RAT]	5	-0.16162	-0.390167	-0.994378	-0.807776	-0.575375	-0.559542	-0.684242	-0.67065	-0.588485	-0.622452	6e-06
D3ZX38	Prefoldin 1 (Predicted) OS=Rattus norvegicus OX=10116 GN=Pfdn1 PE=1 SV=1 - [D3ZX38_RAT]	6	0.181754	0.148163	-0.449637	-0.249214	-0.495377	-0.662005	-0.675877	-0.669051	-0.0922334	-0.625578	2e-05
P0DMW1	Heat shock 70 kDa protein 1B OS=Rattus norvegicus OX=10116 GN=Hspa1b PE=2 SV=1 - [HS71B_RAT]	4	0.0394576	-0.679961	-0.54253	-0.696739	-0.281687	-0.777291	-0.907466	-0.536017	-0.469943	-0.625615	0.002678
Q68FX1	Mannose-6-phosphate isomerase OS=Rattus norvegicus OX=10116 GN=Mpi PE=2 SV=1 - [MPI_RAT]	2	-0.607831	-0.357305	-1.91963	-1.2472	-0.810447	-0.472478	-0.326434	-0.893294	-1.03299	-0.625663	0.002347
D4AAV1	Amidohydrolase domain-containing 1 OS=Rattus norvegicus OX=10116 GN=Amdhd1 PE=1 SV=1 - [D4AAV1_RAT]	6	-0.383804	-0.131538	-0.388374	-0.702537	-0.631564	-0.694176	-0.689078	-0.490423	-0.401563	-0.62631	3e-05
Q7TS56	Carbonyl reductase family member 4 OS=Rattus norvegicus OX=10116 GN=Cbr4 PE=2 SV=1 - [CBR4_RAT]	4	-0.607351	-0.376577	-0.62591	-1.01624	-0.855512	-0.617216	-0.501428	-0.533544	-0.656518	-0.626925	0.00028
G3V9K0	Cysteinyl-tRNA synthetase OS=Rattus norvegicus OX=10116 GN=Cars PE=1 SV=1 - [G3V9K0_RAT]	6	-0.245697	-0.265558	0.0317531	-0.132987	-0.177393	-0.671532	-0.820993	-0.837962	-0.153122	-0.62697	0.004091
A0A0G2K617	RWD domain-containing protein 4 OS=Rattus norvegicus OX=10116 GN=Rwdd4 PE=1 SV=1 - [A0A0G2K617_RAT]	2	-0.474613	-0.308468	-0.903339	-0.345854	-0.386727	-0.663672	-0.702294	-0.757904	-0.508068	-0.627649	0.000282
Q5XIP6	Flap endonuclease 1 OS=Rattus norvegicus OX=10116 GN=Fen1 PE=2 SV=1 - [FEN1_RAT]	3	-0.747355	-0.727934	-0.722756	-0.265192	-0.447162	-0.599058	-0.629974	-0.835673	-0.615809	-0.627967	0.000257
P62634	Cellular nucleic acid-binding protein OS=Rattus norvegicus OX=10116 GN=Cnbp PE=2 SV=1 - [CNBP_RAT]	4	0.269842	0.162782	-0.61986	-0.168197	-0.399306	-0.59395	-0.687187	-0.83198	-0.0888583	-0.628106	0.000437
A0A0G2K6T9	Protocadherin 1 OS=Rattus norvegicus OX=10116 GN=Pcdh1 PE=1 SV=1 - [A0A0G2K6T9_RAT]	6	-0.219408	-0.262579	-0.143466	-0.675579	-0.783491	-0.731883	-0.526633	-0.471701	-0.325258	-0.628427	0.000199
Q01129	Decorin OS=Rattus norvegicus OX=10116 GN=Dcn PE=1 SV=1 - [PGS2_RAT]	18	-1.68863	-1.67484	-1.1587	-1.14326	-0.798934	-0.573618	-0.582075	-0.565591	-1.41636	-0.630054	6.1e-05
F1LSG0	Neural Wiskott-Aldrich syndrome protein OS=Rattus norvegicus OX=10116 GN=Wasl PE=1 SV=2 - [F1LSG0_RAT]	3	-0.251843	-0.369178	-0.65394	-0.251618	-0.463029	-0.698131	-0.708581	-0.65072	-0.381644	-0.630115	6.7e-05
F1LZD2	Hypothetical protein LOC100362109 OS=Rattus norvegicus OX=10116 GN=LOC100362109 PE=4 SV=2 - [F1LZD2_RAT]	2	0.101002	0.430749	-0.275359	-0.323561	-0.299256	-1.15152	-0.808985	-0.264931	-0.016792	-0.631173	0.013543
Q6PCU8	NADH dehydrogenase [ubiquinone] flavoprotein 3, mitochondrial OS=Rattus norvegicus OX=10116 GN=Ndufv3 PE=3 SV=1 - [NDUV3_RAT]	3	0.0592207	0.282637	-0.105291	0.0986352	-0.198951	-0.51785	-0.849298	-0.958945	0.0838005	-0.631261	0.006047
D3ZVU4	Ribokinase OS=Rattus norvegicus OX=10116 GN=Rbks PE=1 SV=1 - [D3ZVU4_RAT]	6	0.294892	-0.513406	-0.689648	-0.0429984	-0.413921	-0.562238	-0.63654	-0.914709	-0.23779	-0.631852	0.000808
F1LMW7	Myristoylated alanine-rich C-kinase substrate OS=Rattus norvegicus OX=10116 GN=Marcks PE=1 SV=3 - [F1LMW7_RAT]	7	-0.945006	-0.69559	-0.657187	-0.353601	-0.566224	-0.645726	-0.693544	-0.622214	-0.662846	-0.631927	3e-06
G3V8R0	Similar to sid2057p OS=Rattus norvegicus OX=10116 GN=RGD1311703 PE=1 SV=1 - [G3V8R0_RAT]	4	0.105354	0.36183	-0.496762	-0.265046	-0.367377	-0.719965	-0.797445	-0.645647	-0.073656	-0.632609	0.000482
A0A0G2KAW7	Eukaryotic translation initiation factor 4H OS=Rattus norvegicus OX=10116 GN=Eif4h PE=1 SV=1 - [A0A0G2KAW7_RAT]	2	-0.342275	-0.251991	-0.420653	-0.266066	-0.406083	-0.893983	-0.624676	-0.60593	-0.320246	-0.632668	0.00061
D4A554	Eukaryotic translation initiation factor 4 gamma, 3 OS=Rattus norvegicus OX=10116 GN=Eif4g3 PE=1 SV=2 - [D4A554_RAT]	12	-0.0606414	-0.199661	-0.404522	-0.545629	-0.604382	-0.589162	-0.640872	-0.702844	-0.302613	-0.634315	3e-06
Q3SWU3	Heterogeneous nuclear ribonucleoprotein D-like OS=Rattus norvegicus OX=10116 GN=Hnrnpdl PE=1 SV=1 - [HNRDL_RAT]	7	-0.548485	-0.0403596	-0.733035	-0.186573	-0.366883	-0.659469	-0.74369	-0.77102	-0.377113	-0.635265	0.000434
A0A0G2JSU3	Protein SET OS=Rattus norvegicus OX=10116 GN=Set PE=1 SV=1 - [A0A0G2JSU3_RAT]	9	-0.335613	-0.303299	-0.693154	-0.152023	-0.446735	-0.741262	-0.718743	-0.634507	-0.371022	-0.635312	0.000109
M0RAS6	Interferon-inducible GTPase 1-like OS=Rattus norvegicus OX=10116 GN=LOC100910979 PE=1 SV=2 - [M0RAS6_RAT]	2	-2.0002	-1.22651	0.10326	-1.3403	-1.30355	-0.513228	-0.455344	-0.269569	-1.11594	-0.635422	0.016199
D3ZU64	VPS37B, ESCRT-I subunit OS=Rattus norvegicus OX=10116 GN=Vps37b PE=1 SV=1 - [D3ZU64_RAT]	2	0.149836	-0.224139	-0.321393	-0.223388	-0.464872	-0.522327	-0.837193	-0.719915	-0.154771	-0.636077	0.000371
P61354	60S ribosomal protein L27 OS=Rattus norvegicus OX=10116 GN=Rpl27 PE=2 SV=2 - [RL27_RAT]	5	-0.734469	0.219568	-0.575103	-0.881534	-0.550528	-0.637934	-0.639991	-0.722488	-0.492884	-0.637735	8e-06
M0R5N4	Prefoldin subunit 4 OS=Rattus norvegicus OX=10116 GN=Pfdn4 PE=1 SV=2 - [M0R5N4_RAT]	4	0.150233	0.0612062	-0.374294	-0.180324	-0.492165	-0.652727	-0.735627	-0.67653	-0.0857948	-0.639262	4.5e-05
Q5RKG9	Eukaryotic translation initiation factor 4B OS=Rattus norvegicus OX=10116 GN=Eif4b PE=1 SV=1 - [Q5RKG9_RAT]	10	-0.00355881	-0.0163387	-0.563795	-0.190549	-0.459329	-0.673404	-0.802246	-0.624025	-0.19356	-0.639751	0.000139
Q8CHM7	2-hydroxyacyl-CoA lyase 1 OS=Rattus norvegicus OX=10116 GN=Hacl1 PE=1 SV=1 - [HACL1_RAT]	15	-0.484058	-0.533617	-0.250004	-0.579783	-0.699066	-0.62881	-0.625936	-0.605236	-0.461866	-0.639762	1e-06
M0R7S5	Perilipin 4 OS=Rattus norvegicus OX=10116 GN=Plin4 PE=4 SV=2 - [M0R7S5_RAT]	10	-1.57316	0.604028	-0.363063	-1.09925	-0.700393	-0.585061	-0.570549	-0.709967	-0.607862	-0.641493	1e-05
F1LZW6	Solute carrier family 25 member 13 OS=Rattus norvegicus OX=10116 GN=Slc25a13 PE=1 SV=2 - [F1LZW6_RAT]	18	-0.439049	0.0883375	-0.103362	-0.716648	-0.722874	-0.620611	-0.6317	-0.591578	-0.29268	-0.641691	4e-06
P62074	Mitochondrial import inner membrane translocase subunit Tim10 OS=Rattus norvegicus OX=10116 GN=Timm10 PE=3 SV=1 - [TIM10_RAT]	9	0.163448	0.228934	-0.0623884	-0.0263171	-0.452925	-0.737602	-0.787388	-0.593789	0.0759191	-0.642926	0.000198
Q6PCT5	Polyglutamine-binding protein 1 OS=Rattus norvegicus OX=10116 GN=Pqbp1 PE=2 SV=1 - [PQBP1_RAT]	5	-0.693305	-0.524281	-0.599217	-0.219217	-0.505407	-0.772177	-0.677801	-0.618414	-0.509005	-0.64345	4.7e-05
P24049	60S ribosomal protein L17 OS=Rattus norvegicus OX=10116 GN=Rpl17 PE=2 SV=3 - [RL17_RAT]	6	-1.0337	-0.0137826	-0.546214	-0.525984	-0.516313	-0.639734	-0.776031	-0.647402	-0.529921	-0.64487	4.2e-05
P50339	Chymase OS=Rattus norvegicus OX=10116 GN=Cma1 PE=2 SV=1 - [CMA1_RAT]	2	-0.417672	-0.374245	-0.138274	-0.149484	-0.627785	-0.47163	-0.822115	-0.659127	-0.269919	-0.645164	0.000143
F1LRS2	Dedicator of cytokinesis 7 OS=Rattus norvegicus OX=10116 GN=Dock7 PE=1 SV=2 - [F1LRS2_RAT]	5	-0.305703	-0.0957879	-0.795006	-1.34785	-0.673368	-0.653636	-0.869869	-0.386948	-0.636087	-0.645955	0.000561
G3V6I9	60S ribosomal protein L26 OS=Rattus norvegicus OX=10116 GN=Rpl26 PE=1 SV=1 - [G3V6I9_RAT]	6	-0.714751	-0.00973196	-0.486431	-0.423908	-0.57078	-0.613843	-0.633101	-0.767901	-0.408705	-0.646406	1.9e-05
D3ZVR9	Phosphoglucomutase 5 OS=Rattus norvegicus OX=10116 GN=Pgm5 PE=1 SV=3 - [D3ZVR9_RAT]	6	-0.501835	-0.564298	-0.469851	-0.507297	-0.666439	-0.766885	-0.546992	-0.60899	-0.51082	-0.647326	2.5e-05
Q6AY96	General transcription factor IIF subunit 1 OS=Rattus norvegicus OX=10116 GN=Gtf2f1 PE=1 SV=1 - [T2FA_RAT]	6	-0.666822	-0.637085	-1.02474	-0.319314	-0.76348	-0.607485	-0.531327	-0.688684	-0.66199	-0.647744	3.2e-05
Q7TM96	Zinc finger protein 622 OS=Rattus norvegicus OX=10116 GN=Znf622 PE=1 SV=2 - [ZN622_RAT]	2	-0.369334	-0.302512	0.159309	0.149353	-0.181949	-0.793015	-1.10961	-0.512121	-0.0907958	-0.649174	0.009426
A0A0H2UI21	Carnitine O-acetyltransferase OS=Rattus norvegicus OX=10116 GN=Crat PE=1 SV=1 - [A0A0H2UI21_RAT]	9	-0.709516	-0.191074	-0.415576	-0.614692	-0.751175	-0.65193	-0.599337	-0.595281	-0.482714	-0.649431	8e-06
D3ZCZ9	NADH dehydrogenase [ubiquinone] iron-sulfur protein 6, mitochondrial OS=Rattus norvegicus OX=10116 GN=LOC100912599 PE=1 SV=1 - [D3ZCZ9_RAT]	5	-0.430604	-0.156435	-0.180985	-0.220259	-0.466934	-0.687537	-0.766512	-0.67846	-0.247071	-0.649861	8.6e-05
B4F787	Chmp1b protein (Fragment) OS=Rattus norvegicus OX=10116 GN=Chmp1b PE=2 SV=1 - [B4F787_RAT]	3	-0.457091	-0.658139	-0.588122	0.126316	-0.353755	-0.739082	-0.672006	-0.834672	-0.394259	-0.649879	0.000707
P97615	Thioredoxin, mitochondrial OS=Rattus norvegicus OX=10116 GN=Txn2 PE=2 SV=1 - [THIOM_RAT]	2	0.247796	0.144639	-0.285012	-0.166784	-0.639304	-0.563021	-0.676897	-0.721992	-0.0148403	-0.650304	7e-06
P38718	Mitochondrial pyruvate carrier 2 OS=Rattus norvegicus OX=10116 GN=Mpc2 PE=2 SV=1 - [MPC2_RAT]	3	-0.726626	0.135402	-0.415007	-0.971548	-0.776674	-0.530317	-0.510067	-0.787203	-0.494445	-0.651065	0.000182
P20673	Argininosuccinate lyase OS=Rattus norvegicus OX=10116 GN=Asl PE=2 SV=1 - [ARLY_RAT]	10	0.600188	0.615262	0.313666	-0.506511	-0.745622	-0.654997	-0.607051	-0.599398	0.255651	-0.651767	7e-06
B0BN99	Hmgb3 protein OS=Rattus norvegicus OX=10116 GN=Hmgb3 PE=1 SV=1 - [B0BN99_RAT]	8	-0.490065	-0.604628	-0.300047	0.00780519	-0.513207	-0.721971	-0.6976	-0.683948	-0.346734	-0.654181	2.7e-05
P21213	Histidine ammonia-lyase OS=Rattus norvegicus OX=10116 GN=Hal PE=1 SV=1 - [HUTH_RAT]	2	-0.541484	-0.479608	-0.503444	-1.43929	-1.25717	-0.555273	-0.431945	-0.382195	-0.740956	-0.656645	0.009951
Q63187	Elongin-A OS=Rattus norvegicus OX=10116 GN=Eloa PE=1 SV=1 - [ELOA1_RAT]	5	-0.377272	-0.333739	-0.645907	-0.312144	-0.516821	-0.706006	-0.685915	-0.720393	-0.417266	-0.657284	2.4e-05
B1H228	Coiled-coil domain-containing protein 114 OS=Rattus norvegicus OX=10116 GN=Ccdc114 PE=1 SV=1 - [CC114_RAT]	2	0.0448963	1.36252	0.215404	-0.614379	-0.647631	-0.847457	-0.929352	-0.211437	0.252111	-0.658969	0.004018
F1LPH1	Calpastatin OS=Rattus norvegicus OX=10116 GN=Cast PE=1 SV=1 - [F1LPH1_RAT]	14	-0.147938	-0.362839	-0.645666	-0.335829	-0.414263	-0.72065	-0.685287	-0.8169	-0.373068	-0.659275	0.00031
Q6P790	60S ribosomal protein L6 (Fragment) OS=Rattus norvegicus OX=10116 GN=Rpl6 PE=2 SV=1 - [Q6P790_RAT]	11	-0.564467	0.107104	-0.419329	-0.569948	-0.594964	-0.640866	-0.711937	-0.690441	-0.36166	-0.659552	3e-06
F1LMK0	A kinase (PRKA) anchor protein 1, isoform CRA_a OS=Rattus norvegicus OX=10116 GN=Akap1 PE=1 SV=2 - [F1LMK0_RAT]	8	-0.135452	0.216382	-0.322151	-0.212734	-0.600849	-0.699974	-0.651058	-0.692908	-0.113489	-0.661197	2e-06
A0A0G2K4X5	Zinc fingers and homeoboxes protein 3 OS=Rattus norvegicus OX=10116 GN=Zhx3 PE=1 SV=1 - [A0A0G2K4X5_RAT]	5	-0.00441029	-0.617705	-0.543978	-0.309547	-0.416583	-0.924394	-0.699731	-0.606593	-0.36891	-0.661825	0.000625
Q6P6R2	Dihydrolipoyl dehydrogenase, mitochondrial OS=Rattus norvegicus OX=10116 GN=Dld PE=1 SV=1 - [DLDH_RAT]	18	-0.0386915	0.0402196	-0.300422	-0.132217	-0.469471	-0.730085	-0.726148	-0.732785	-0.107777	-0.664622	8.5e-05
A0A0G2JWJ0	Protein phosphatase 1 regulatory subunit 12A OS=Rattus norvegicus OX=10116 GN=Ppp1r12a PE=1 SV=1 - [A0A0G2JWJ0_RAT]	24	-0.53535	-0.457799	-0.618381	-0.417767	-0.57559	-0.699109	-0.7263	-0.658583	-0.507324	-0.664896	5e-06
Q5YB86	E3 ubiquitin-protein ligase OS=Rattus norvegicus OX=10116 GN=Itch PE=2 SV=1 - [Q5YB86_RAT]	2	-0.349632	-0.409657	-0.0613757	-0.980109	-1.07008	-0.580196	-0.633897	-0.377703	-0.450193	-0.665469	0.002547
F1LQI4	Aggrecan core protein OS=Rattus norvegicus OX=10116 GN=Acan PE=1 SV=2 - [F1LQI4_RAT]	7	-0.0247383	-0.30896	0.0152831	-0.18063	-0.669344	-0.787966	-0.668271	-0.53726	-0.124761	-0.66571	3.1e-05
Q498D5	Regulator of microtubule dynamics protein 2 OS=Rattus norvegicus OX=10116 GN=Rmdn2 PE=1 SV=1 - [RMD2_RAT]	3	-0.670382	-0.459245	-0.543732	-0.804468	-0.816326	-0.561646	-0.706805	-0.583506	-0.619457	-0.667071	6.3e-05
P45592	Cofilin-1 OS=Rattus norvegicus OX=10116 GN=Cfl1 PE=1 SV=3 - [COF1_RAT]	15	-0.611617	-0.463851	-0.822795	-0.231485	-0.481226	-0.678091	-0.764017	-0.755635	-0.532437	-0.669742	8.8e-05
O88321	Antisecretory factor OS=Rattus norvegicus OX=10116 GN=Psmd4 PE=1 SV=1 - [O88321_RAT]	8	-0.269594	-0.299343	-0.897043	-0.461146	-0.441974	-0.748827	-0.741199	-0.75213	-0.481782	-0.671033	0.000163
D4A9Q3	Uncharacterized protein OS=Rattus norvegicus OX=10116 PE=3 SV=1 - [D4A9Q3_RAT]	3	-0.134717	0.197044	-0.253925	-0.296964	-0.537527	-0.62827	-0.803206	-0.71785	-0.12214	-0.671713	4.5e-05
P12843	Insulin-like growth factor-binding protein 2 OS=Rattus norvegicus OX=10116 GN=Igfbp2 PE=1 SV=3 - [IBP2_RAT]	7	0.271407	0.362606	0.0329261	0.0890107	-0.439492	-0.685289	-0.787348	-0.775038	0.188987	-0.671792	0.000204
P84100	60S ribosomal protein L19 OS=Rattus norvegicus OX=10116 GN=Rpl19 PE=1 SV=1 - [RL19_RAT]	6	-0.763139	0.0899476	-0.357476	-0.666807	-0.574606	-0.638809	-0.750343	-0.723919	-0.424369	-0.671919	1.3e-05
D4A885	ATP-binding cassette subfamily A member 13 OS=Rattus norvegicus OX=10116 GN=Abca13 PE=4 SV=3 - [D4A885_RAT]	2	-0.786447	-0.743324	-0.76378	-0.428749	-0.656597	-0.213634	0	-1.81766	-0.680575	-0.671973	0.035366
P20767	Ig lambda-2 chain C region OS=Rattus norvegicus OX=10116 PE=4 SV=1 - [LAC2_RAT]	3	0.204004	-0.552718	-0.439014	-0.706073	-0.822627	-0.462466	-0.747625	-0.65645	-0.37345	-0.672292	0.000173
Q64548	Reticulon-1 OS=Rattus norvegicus OX=10116 GN=Rtn1 PE=1 SV=1 - [RTN1_RAT]	6	0.101785	-0.152346	0.189105	-0.121842	-0.615123	-0.785158	-0.793818	-0.500351	0.00417547	-0.673613	0.000112
O35814	Stress-induced-phosphoprotein 1 OS=Rattus norvegicus OX=10116 GN=Stip1 PE=1 SV=1 - [STIP1_RAT]	36	-0.133	-0.0322003	-0.67387	-0.270667	-0.50988	-0.738538	-0.762361	-0.690053	-0.277434	-0.675208	4.7e-05
P02770	Serum albumin OS=Rattus norvegicus OX=10116 GN=Alb PE=1 SV=2 - [ALBU_RAT]	2	-0.0288283	-0.242959	-0.208082	0.439573	-0.353441	-0.741025	-0.811637	-0.800271	-0.0100739	-0.676594	0.000722
P60901	Proteasome subunit alpha type-6 OS=Rattus norvegicus OX=10116 GN=Psma6 PE=1 SV=1 - [PSA6_RAT]	9	0.410772	-0.321767	-0.239232	-0.00429699	-0.452025	-0.760206	-0.778767	-0.71715	-0.0386312	-0.677037	0.000156
A0A0G2K459	Mitochondrial carrier 2 OS=Rattus norvegicus OX=10116 GN=Mtch2 PE=1 SV=1 - [A0A0G2K459_RAT]	7	-1.15246	0.0179993	-0.559109	-1.29713	-0.947213	-0.64291	-0.58737	-0.532192	-0.747674	-0.677421	0.000364
P34926	Microtubule-associated protein 1A OS=Rattus norvegicus OX=10116 GN=Map1a PE=1 SV=1 - [MAP1A_RAT]	12	-1.23932	-0.374837	-0.477952	-0.595498	-0.580485	-0.624833	-0.659652	-0.845738	-0.671902	-0.677677	5.6e-05
F1LTB8	UDP-glucuronosyltransferase OS=Rattus norvegicus OX=10116 GN=RGD1559459 PE=1 SV=2 - [F1LTB8_RAT]	6	-1.10544	-0.414471	-0.518182	-0.977083	-0.761658	-0.596831	-0.582735	-0.774526	-0.753793	-0.678938	2.9e-05
Q9ES75	Proline-rich acidic protein 1 OS=Rattus norvegicus OX=10116 GN=Prap1 PE=2 SV=1 - [PRAP1_RAT]	2	-0.300491	-0.804398	-0.618734	-0.853811	-0.752342	-0.616684	-0.707157	-0.642345	-0.644359	-0.679632	4e-06
P12939	Cytochrome P450 2D10 OS=Rattus norvegicus OX=10116 GN=Cyp2d10 PE=1 SV=1 - [CP2DA_RAT]	8	-1.27909	-0.738277	-1.14368	-1.56012	-0.960328	-0.511637	-0.522666	-0.727034	-1.18029	-0.680416	0.000617
D3ZC82	NUFIP2, FMR1-interacting protein 2 OS=Rattus norvegicus OX=10116 GN=Nufip2 PE=1 SV=2 - [D3ZC82_RAT]	10	-0.389547	-0.0909513	-0.611941	-0.237548	-0.397824	-0.744937	-0.726515	-0.857774	-0.332497	-0.681762	0.000444
Q5U2U7	mRNA cap guanine-N7 methyltransferase OS=Rattus norvegicus OX=10116 GN=Rnmt PE=1 SV=1 - [MCES_RAT]	3	-0.48513	-0.478419	-0.599892	-0.881399	-0.818077	-0.645362	-0.715281	-0.560742	-0.61121	-0.684866	3.8e-05
Q6SKG1	Acyl-coenzyme A synthetase ACSM3, mitochondrial OS=Rattus norvegicus OX=10116 GN=Acsm3 PE=2 SV=1 - [ACSM3_RAT]	4	-0.710092	-0.908894	-0.741849	-1.04325	-0.772268	-0.660423	-0.544134	-0.763581	-0.851022	-0.685101	3.5e-05
A0A0G2K033	Ubiquitin-specific peptidase 36 OS=Rattus norvegicus OX=10116 GN=Usp36 PE=3 SV=1 - [A0A0G2K033_RAT]	2	-0.415148	-0.305168	-0.840346	-0.221028	-0.295344	-0.544851	-0.873184	-1.0304	-0.445422	-0.685946	0.00371
G3V972	Gem (Nuclear organelle) associated protein 6, isoform CRA_a OS=Rattus norvegicus OX=10116 GN=Gemin6 PE=1 SV=1 - [G3V972_RAT]	3	0.184453	-0.317896	-1.03036	-0.345389	-0.489865	-0.787236	-0.824134	-0.64286	-0.377298	-0.686024	0.000142
A0A0G2KA83	Fibrinogen-like protein 1 OS=Rattus norvegicus OX=10116 GN=Fgl1 PE=1 SV=1 - [A0A0G2KA83_RAT]	3	-0.401003	-0.447234	0.00408036	-0.734499	-0.83692	-0.584379	-0.705744	-0.618211	-0.394664	-0.686313	4.6e-05
G3V9H6	PPFIA-binding protein 2 OS=Rattus norvegicus OX=10116 GN=Ppfibp2 PE=1 SV=1 - [G3V9H6_RAT]	4	-0.128571	-0.435407	-0.423355	-0.410393	-0.585214	-0.778559	-0.809574	-0.57499	-0.349431	-0.687084	6.3e-05
Q5I0N5	Agxt protein (Fragment) OS=Rattus norvegicus OX=10116 GN=Agxt PE=2 SV=1 - [Q5I0N5_RAT]	11	-0.713821	-0.841839	-0.68137	-1.06979	-0.856102	-0.620002	-0.600858	-0.67165	-0.826705	-0.687153	5.1e-05
P04694	Tyrosine aminotransferase OS=Rattus norvegicus OX=10116 GN=Tat PE=1 SV=1 - [ATTY_RAT]	2	-0.440398	-0.179626	0.0532874	0.00471937	-0.344817	-0.90946	-0.846199	-0.648638	-0.140504	-0.687278	0.001328
Q5XIG5	G kinase-anchoring protein 1 OS=Rattus norvegicus OX=10116 GN=Gkap1 PE=1 SV=1 - [GKAP1_RAT]	2	-0.48076	-0.407903	-0.643745	-0.179161	-0.479943	-0.788034	-0.750854	-0.74139	-0.427892	-0.690055	0.000102
A0A0G2KAE4	Sulfhydryl oxidase OS=Rattus norvegicus OX=10116 GN=LOC100912596 PE=4 SV=1 - [A0A0G2KAE4_RAT]	2	-0.0149172	0.248712	-0.247216	0.0586053	-0.397863	-0.83057	-0.76789	-0.765783	0.0112961	-0.690526	0.000415
P39069	Adenylate kinase isoenzyme 1 OS=Rattus norvegicus OX=10116 GN=Ak1 PE=1 SV=3 - [KAD1_RAT]	6	-0.97299	0.838167	-0.145489	-0.582496	-0.476007	-0.742224	-0.771155	-0.776904	-0.215702	-0.691572	0.000104
P35433	Amidophosphoribosyltransferase OS=Rattus norvegicus OX=10116 GN=Ppat PE=1 SV=1 - [PUR1_RAT]	3	-0.444338	-0.415851	-0.497931	-0.196952	-0.555756	-0.743486	-0.70727	-0.761597	-0.388768	-0.692027	1.7e-05
G3V660	NOL1/NOP2/Sun domain family, member 5 (Predicted) OS=Rattus norvegicus OX=10116 GN=Nsun5 PE=1 SV=1 - [G3V660_RAT]	2	-0.914976	-0.0288814	-0.931244	0.643008	-0.262179	-0.791637	-1.6689	-0.052995	-0.308024	-0.693929	0.046829
P13086	Succinate--CoA ligase [ADP/GDP-forming] subunit alpha, mitochondrial OS=Rattus norvegicus OX=10116 GN=Suclg1 PE=2 SV=2 - [SUCA_RAT]	10	-0.764716	-0.46843	-0.303506	-0.0884638	-0.49612	-0.723481	-0.745286	-0.817351	-0.406279	-0.69556	8.9e-05
B0K024	Aamp protein (Fragment) OS=Rattus norvegicus OX=10116 GN=Aamp PE=2 SV=1 - [B0K024_RAT]	3	0.31018	-0.179975	-0.335717	0.152091	-0.536822	-0.722384	-0.697189	-0.825878	-0.0133551	-0.695568	5e-05
P31044	Phosphatidylethanolamine-binding protein 1 OS=Rattus norvegicus OX=10116 GN=Pebp1 PE=1 SV=3 - [PEBP1_RAT]	6	-0.102867	-0.202367	-0.508637	-0.100797	-0.402316	-0.766936	-0.780034	-0.834318	-0.228667	-0.695901	0.000421
P11030	Acyl-CoA-binding protein OS=Rattus norvegicus OX=10116 GN=Dbi PE=1 SV=3 - [ACBP_RAT]	7	0.0383474	-0.0906794	-0.398039	-0.039159	-0.43249	-0.712487	-0.752705	-0.892672	-0.122382	-0.697588	0.000371
B1WC11	Acyl-CoA synthetase short-chain family member 2 OS=Rattus norvegicus OX=10116 GN=Acss2 PE=2 SV=1 - [B1WC11_RAT]	2	0.038856	0.583837	0.299614	-0.415264	-0.740681	-0.775871	-0.451015	-0.832711	0.126761	-0.70007	0.000213
Q4KMA2	UV excision repair protein RAD23 homolog B OS=Rattus norvegicus OX=10116 GN=Rad23b PE=1 SV=1 - [RD23B_RAT]	10	-0.0132684	-0.16129	-0.528487	-0.350692	-0.662989	-0.778713	-0.693667	-0.666981	-0.263434	-0.700588	2e-06
M0R5F8	High mobility group nucleosome-binding domain-containing protein 5 OS=Rattus norvegicus OX=10116 GN=Hmgn5 PE=4 SV=1 - [M0R5F8_RAT]	8	-0.196381	-0.367919	-0.189527	0.266908	-0.456195	-0.77796	-0.765513	-0.825318	-0.12173	-0.706247	0.00019
Q6AYD3	Proliferation-associated protein 2G4 OS=Rattus norvegicus OX=10116 GN=Pa2g4 PE=1 SV=1 - [PA2G4_RAT]	11	-0.45498	-0.412753	-0.7517	-0.36107	-0.559881	-0.737012	-0.760555	-0.779695	-0.495126	-0.709286	2.4e-05
Q5XIB1	Protein TSSC4 OS=Rattus norvegicus OX=10116 GN=Tssc4 PE=2 SV=1 - [TSSC4_RAT]	2	-0.906709	-1.02873	-0.816864	-0.78738	-0.6381	-0.771281	-0.939138	-0.490572	-0.884921	-0.709773	0.000325
P47875	Cysteine and glycine-rich protein 1 OS=Rattus norvegicus OX=10116 GN=Csrp1 PE=1 SV=2 - [CSRP1_RAT]	9	-0.781958	-1.01625	-1.15772	-0.788907	-0.663042	-0.763502	-0.811597	-0.60108	-0.936208	-0.709805	1.9e-05
P35284	Ras-related protein Rab-12 OS=Rattus norvegicus OX=10116 GN=Rab12 PE=1 SV=2 - [RAB12_RAT]	2	-1.18052	-0.156702	-0.0807967	-1.43773	-1.09574	-0.635716	-0.562979	-0.547128	-0.713937	-0.710391	0.00123
D3ZCP9	Transcription initiation factor IIE subunit beta OS=Rattus norvegicus OX=10116 GN=Gtf2e2 PE=1 SV=1 - [D3ZCP9_RAT]	3	-1.15411	-1.13675	-0.984743	-0.670403	-0.677545	-0.722029	-0.875541	-0.570173	-0.986499	-0.711322	6.1e-05
Q00981	Ubiquitin carboxyl-terminal hydrolase isozyme L1 OS=Rattus norvegicus OX=10116 GN=Uchl1 PE=1 SV=2 - [UCHL1_RAT]	2	-0.914865	-1.16268	-1.23606	-0.692938	-0.595346	-0.747772	-0.848815	-0.661435	-1.00164	-0.713342	3.1e-05
B0BNF9	Hydroxyacid oxidase 1 OS=Rattus norvegicus OX=10116 GN=Hao1 PE=1 SV=1 - [B0BNF9_RAT]	11	-2.1937	-2.08912	-1.65547	-1.70551	-0.975252	-0.633007	-0.602246	-0.654118	-1.91095	-0.716156	0.000232
F1LX55	EPH receptor A10 OS=Rattus norvegicus OX=10116 GN=Epha10 PE=4 SV=3 - [F1LX55_RAT]	2	-0.579816	-0.585903	-0.115499	-0.277565	-0.826432	-0.758314	-0.791888	-0.495802	-0.389696	-0.718109	0.000107
A0A0G2K5L2	RCG47744, isoform CRA_c OS=Rattus norvegicus OX=10116 GN=LOC100911440 PE=1 SV=1 - [A0A0G2K5L2_RAT]	9	-0.736663	0.079673	-0.21022	-0.75518	-0.714776	-0.697937	-0.718135	-0.744524	-0.405597	-0.718843	<0.000001
D3ZKK5	Myotubularin-related protein 1 OS=Rattus norvegicus OX=10116 GN=Mtmr1 PE=1 SV=1 - [D3ZKK5_RAT]	2	0	-0.843172	0	-0.135295	-0.114522	-1.37753	0	-1.38705	-0.244617	-0.719777	0.021244
B2RZ79	Iron-sulfur cluster assembly enzyme OS=Rattus norvegicus OX=10116 GN=Iscu PE=1 SV=1 - [B2RZ79_RAT]	6	0.017293	-0.0468057	-0.375837	-0.132858	-0.630982	-0.706656	-0.847597	-0.697464	-0.134552	-0.720675	1.5e-05
Q5PQN7	Protein LZIC OS=Rattus norvegicus OX=10116 GN=Lzic PE=2 SV=1 - [LZIC_RAT]	4	-0.294445	-0.513953	-0.828684	-0.224529	-0.351895	-0.675919	-1.06647	-0.78898	-0.465403	-0.720816	0.001983
Q5U2R7	LRP chaperone MESD OS=Rattus norvegicus OX=10116 GN=Mesd PE=2 SV=1 - [MESD_RAT]	10	-0.0204909	0.34682	0.130632	0.301327	-0.442478	-0.68984	-0.877757	-0.884694	0.189572	-0.723692	0.00044
B0BNG1	Proline dehydrogenase OS=Rattus norvegicus OX=10116 GN=Prodh2 PE=2 SV=1 - [B0BNG1_RAT]	6	-1.02762	-0.20251	-0.239569	-1.14688	-0.831093	-0.671222	-0.765691	-0.635385	-0.654146	-0.725848	1.3e-05
Q6AXS5	Plasminogen activator inhibitor 1 RNA-binding protein OS=Rattus norvegicus OX=10116 GN=Serbp1 PE=1 SV=2 - [PAIRB_RAT]	20	-0.173238	-0.0970866	-0.58605	-0.16898	-0.466284	-0.730986	-0.815507	-0.909452	-0.256339	-0.730557	0.000276
D4A5S9	Pre-mRNA-processing factor 39 OS=Rattus norvegicus OX=10116 GN=Prpf39 PE=1 SV=1 - [D4A5S9_RAT]	2	-0.301529	-0.464705	-1.41044	-0.38404	-1.1053	-1.29261	-0.362874	-0.161599	-0.64018	-0.730596	0.019446
G3V7Y3	ATP synthase subunit delta, mitochondrial OS=Rattus norvegicus OX=10116 GN=Atp5f1d PE=1 SV=1 - [G3V7Y3_RAT]	3	-0.0182191	0.0412858	-0.179651	-0.242996	-0.666386	-0.805428	-0.754741	-0.699142	-0.0998951	-0.731424	3e-06
D4A2G6	Thrombospondin 2 OS=Rattus norvegicus OX=10116 GN=Thbs2 PE=4 SV=2 - [D4A2G6_RAT]	5	-1.2324	-1.42378	-1.29067	-1.2748	-1.15878	-0.674002	-0.578947	-0.514212	-1.30541	-0.731486	0.001812
A0A0G2K681	CAP-Gly domain-containing linker protein 1 OS=Rattus norvegicus OX=10116 GN=Clip1 PE=1 SV=1 - [A0A0G2K681_RAT]	3	0.152541	-0.241304	-0.717376	-0.639355	-0.83413	-0.91294	-0.655497	-0.529405	-0.361374	-0.732993	0.000176
D3ZSU6	Ankyrin repeat domain 11 OS=Rattus norvegicus OX=10116 GN=Ankrd11 PE=1 SV=3 - [D3ZSU6_RAT]	2	-1.16773	-0.545561	-0.84303	-0.479356	-0.744484	-0.818382	-0.563606	-0.821189	-0.758919	-0.736915	4.5e-05
P60841	Alpha-endosulfine OS=Rattus norvegicus OX=10116 GN=Ensa PE=1 SV=1 - [ENSA_RAT]	4	-0.264605	-0.0701401	-0.55373	-0.312815	-0.662693	-0.795874	-0.822288	-0.667284	-0.300323	-0.737035	1e-05
Q6MGD2	Zinc finger and BTB domain-containing 9 OS=Rattus norvegicus OX=10116 GN=Zbtb9 PE=2 SV=1 - [Q6MGD2_RAT]	2	0	0	-0.735204	0.308154	-1.54923	-0.982952	-0.416964	0	-0.106763	-0.737287	0.008615
Q5M827	Pirin OS=Rattus norvegicus OX=10116 GN=Pir PE=1 SV=1 - [PIR_RAT]	5	-0.159072	-0.316499	-0.921104	-0.312434	-0.524612	-0.800452	-0.790854	-0.83403	-0.427277	-0.737487	8.6e-05
O35849	Lecithin cholesterol acyltransferase OS=Rattus norvegicus OX=10116 GN=Lcat PE=1 SV=1 - [O35849_RAT]	4	-0.482895	-1.01106	-0.609088	-0.370196	-0.561265	-0.758147	-0.885158	-0.7481	-0.618311	-0.738167	6.5e-05
G3V7Z6	ATP-binding cassette sub-family D member 2 OS=Rattus norvegicus OX=10116 GN=Abcd2 PE=1 SV=1 - [G3V7Z6_RAT]	3	-1.41466	-0.325993	-0.446666	-0.812131	-0.811769	-0.777619	-0.766898	-0.598181	-0.749863	-0.738617	1.5e-05
Q5PPN5	Tubulin polymerization-promoting protein family member 3 OS=Rattus norvegicus OX=10116 GN=Tppp3 PE=2 SV=1 - [TPPP3_RAT]	10	-2.14037	-0.221364	-0.706596	-1.12041	-0.736119	-0.697511	-0.690228	-0.832269	-1.04719	-0.739032	3e-06
D4A6W6	Uncharacterized protein OS=Rattus norvegicus OX=10116 PE=3 SV=1 - [D4A6W6_RAT]	5	-0.63459	0.0500482	-0.460101	-0.61902	-0.694504	-0.817592	-0.780992	-0.663261	-0.415916	-0.739087	6e-06
Q6LDS4	Superoxide dismutase [Cu-Zn] OS=Rattus norvegicus OX=10116 PE=2 SV=1 - [Q6LDS4_RAT]	6	-0.0730568	-0.289064	-0.552293	-0.319632	-0.630261	-0.722297	-0.885854	-0.724167	-0.308512	-0.740645	2.7e-05
D3ZUL1	Coiled-coil domain-containing 124 OS=Rattus norvegicus OX=10116 GN=Ccdc124 PE=1 SV=1 - [D3ZUL1_RAT]	3	-0.889031	-0.396848	-0.51629	-0.471525	-0.486593	-0.769177	-0.845381	-0.863699	-0.568423	-0.741213	0.000177
Q7TSU1	Brefeldin A-inhibited guanine nucleotide-exchange protein 2 OS=Rattus norvegicus OX=10116 GN=Arfgef2 PE=1 SV=1 - [BIG2_RAT]	3	-0.0749457	-0.724507	-0.989016	0	-0.905303	-0.737855	-0.9325	-0.389742	-0.447117	-0.74135	0.00085
Q63150	Dihydropyrimidinase OS=Rattus norvegicus OX=10116 GN=Dpys PE=1 SV=2 - [DPYS_RAT]	13	0.0439346	-0.948398	-0.746902	-0.564145	-0.762146	-0.731697	-0.740623	-0.732189	-0.553877	-0.741664	<0.000001
P55213	Caspase-3 OS=Rattus norvegicus OX=10116 GN=Casp3 PE=2 SV=2 - [CASP3_RAT]	3	-0.265324	-0.684857	-0.857874	-0.408567	-0.615673	-0.772708	-0.78412	-0.796988	-0.554155	-0.742372	9e-06
P83883	60S ribosomal protein L36a OS=Rattus norvegicus OX=10116 GN=Rpl36a PE=1 SV=2 - [RL36A_RAT]	4	-0.695933	0.248477	-0.367715	-0.485367	-0.557712	-0.731954	-0.908898	-0.774022	-0.325134	-0.743147	8.2e-05
Q5FVG5	Similar to tropomyosin 1, embryonic fibroblast-rat, isoform CRA_c OS=Rattus norvegicus OX=10116 GN=Tpm2 PE=2 SV=1 - [Q5FVG5_RAT]	3	-1.36271	-1.6782	-1.26181	-1.03053	-0.825035	-0.663764	-0.665142	-0.828899	-1.33331	-0.74571	1.5e-05
A0A096MIZ1	Paralemmin 2 OS=Rattus norvegicus OX=10116 GN=Palm2 PE=1 SV=1 - [A0A096MIZ1_RAT]	6	-0.714812	-0.408956	-0.148642	-0.779418	-0.70162	-0.571509	-0.907097	-0.809332	-0.512957	-0.747389	8.5e-05
P16970	ATP-binding cassette sub-family D member 3 OS=Rattus norvegicus OX=10116 GN=Abcd3 PE=1 SV=3 - [ABCD3_RAT]	15	-1.29367	-0.304328	-0.388187	-1.07085	-0.901374	-0.708323	-0.683974	-0.698558	-0.764258	-0.748057	2e-05
P17178	Sterol 26-hydroxylase, mitochondrial OS=Rattus norvegicus OX=10116 GN=Cyp27a1 PE=1 SV=1 - [CP27A_RAT]	11	-0.860479	0.0136436	-0.261492	-0.886031	-0.735893	-0.765734	-0.681441	-0.813318	-0.49859	-0.749097	2e-06
A0A0G2K3Z9	Uncharacterized protein OS=Rattus norvegicus OX=10116 PE=4 SV=1 - [A0A0G2K3Z9_RAT]	13	0.259946	-0.19876	-0.57172	-0.261823	-0.618804	-0.746174	-0.807679	-0.827242	-0.193089	-0.749975	1.4e-05
Q6AY80	Ribosyldihydronicotinamide dehydrogenase [quinone] OS=Rattus norvegicus OX=10116 GN=Nqo2 PE=1 SV=3 - [NQO2_RAT]	2	-0.280442	-0.261631	-0.935322	-1.42895	-1.13095	-0.826192	-0.442505	-0.60073	-0.726587	-0.750094	0.001757
D3ZUM5	Tripartite motif-containing 33 OS=Rattus norvegicus OX=10116 GN=Trim33 PE=1 SV=3 - [D3ZUM5_RAT]	2	-0.572938	-0.770121	-0.566747	-0.135793	-0.590034	-0.617907	-0.807671	-0.98627	-0.511399	-0.750471	0.000225
E9PT59	Rho guanine nucleotide exchange factor 5 OS=Rattus norvegicus OX=10116 GN=Arhgef5 PE=1 SV=3 - [E9PT59_RAT]	3	0.304897	-0.131336	-0.677211	-0.115493	-0.826352	-0.763819	-0.830843	-0.583567	-0.154786	-0.751145	3.5e-05
Q923W4	Hepatoma-derived growth factor-related protein 3 OS=Rattus norvegicus OX=10116 GN=Hdgfl3 PE=1 SV=1 - [HDGR3_RAT]	4	-1.4199	-0.80313	-0.790207	-0.591701	-0.751629	-0.706207	-0.844426	-0.706282	-0.901235	-0.752136	3e-06
Q712U5	cAMP-regulated phosphoprotein 19 OS=Rattus norvegicus OX=10116 GN=Arpp19 PE=1 SV=3 - [ARP19_RAT]	4	-0.260692	-0.200415	-0.635029	-0.238636	-0.543335	-0.772286	-0.800783	-0.893937	-0.333693	-0.752585	9e-05
F1LSW7	60S ribosomal protein L14 OS=Rattus norvegicus OX=10116 GN=Rpl14 PE=1 SV=2 - [F1LSW7_RAT]	5	-1.04296	0.203999	-0.789276	-0.958615	-0.770368	-0.639089	-0.820196	-0.788424	-0.646712	-0.754519	7e-06
P29117	Peptidyl-prolyl cis-trans isomerase F, mitochondrial OS=Rattus norvegicus OX=10116 GN=Ppif PE=1 SV=2 - [PPIF_RAT]	7	0.017208	0.0396043	-0.221281	-0.29191	-0.613033	-0.767134	-0.857555	-0.782696	-0.114095	-0.755105	2.1e-05
D3ZDQ9	Sarcoglycan, alpha OS=Rattus norvegicus OX=10116 GN=Sgca PE=1 SV=1 - [D3ZDQ9_RAT]	3	-0.518286	0.199389	-0.554227	-0.753046	-0.574525	-1.10541	-0.794928	-0.560186	-0.406543	-0.758761	0.000893
G3V644	NADH dehydrogenase (Ubiquinone) flavoprotein 3-like, isoform CRA_a OS=Rattus norvegicus OX=10116 GN=Ndufv3 PE=1 SV=1 - [G3V644_RAT]	15	-0.706915	-0.443344	-0.921455	-0.569112	-0.565096	-0.789129	-0.72401	-0.963394	-0.660206	-0.760407	0.00012
Q642A6	von Willebrand factor A domain-containing protein 1 OS=Rattus norvegicus OX=10116 GN=Vwa1 PE=2 SV=1 - [VWA1_RAT]	2	0	-1.04371	0.144961	-0.668098	-0.681007	-0.732878	-1.04626	-0.581846	-0.391712	-0.760498	0.000315
D4A5T8	Periplakin OS=Rattus norvegicus OX=10116 GN=Ppl PE=1 SV=1 - [D4A5T8_RAT]	48	-0.833653	-0.535216	-0.599043	-1.04325	-0.903372	-0.698496	-0.738189	-0.705012	-0.75279	-0.761267	1.3e-05
B2RZD4	60S ribosomal protein L34 OS=Rattus norvegicus OX=10116 GN=Rpl34 PE=1 SV=1 - [B2RZD4_RAT]	4	-0.679641	0.115504	-0.437485	-0.656762	-0.692552	-0.821399	-0.768963	-0.763882	-0.414596	-0.761699	2e-06
A0A0H2UHH2	Serum amyloid P-component OS=Rattus norvegicus OX=10116 GN=Apcs PE=1 SV=1 - [A0A0H2UHH2_RAT]	8	-0.657969	-1.3426	-1.12384	-0.597382	-0.802182	-0.778345	-0.719904	-0.750031	-0.930448	-0.762615	<0.000001
A0A0G2JUY4	Uncharacterized protein OS=Rattus norvegicus OX=10116 PE=1 SV=1 - [A0A0G2JUY4_RAT]	3	0.0135117	-0.034755	-0.276771	-0.114597	-0.520305	-0.882414	-0.894494	-0.754206	-0.103153	-0.762854	0.000156
M0RCH6	Uncharacterized protein OS=Rattus norvegicus OX=10116 PE=1 SV=2 - [M0RCH6_RAT]	9	-0.862863	-0.858973	-0.990073	-0.641234	-0.71228	-0.774981	-0.836717	-0.735957	-0.838286	-0.764984	2e-06
A0A0G2K654	Histone cluster 1 H1 family member c OS=Rattus norvegicus OX=10116 GN=Hist1h1c PE=1 SV=1 - [A0A0G2K654_RAT]	3	-1.90242	-0.864846	-0.532788	-0.803281	-0.797407	-0.707303	-0.80608	-0.749949	-1.02583	-0.765185	1e-06
G3V6C2	Homogentisate 1, 2-dioxygenase OS=Rattus norvegicus OX=10116 GN=Hgd PE=1 SV=1 - [G3V6C2_RAT]	6	0.115932	-0.334802	-0.398265	-0.801133	-0.915305	-0.731354	-0.764129	-0.672848	-0.354567	-0.770909	2.1e-05
P55051	Fatty acid-binding protein, brain OS=Rattus norvegicus OX=10116 GN=Fabp7 PE=1 SV=2 - [FABP7_RAT]	8	-0.28021	-0.70512	-0.513835	-0.426233	-0.722037	-0.840041	-0.806343	-0.715968	-0.48135	-0.771097	3e-06
Q9ES38	Bile acyl-CoA synthetase OS=Rattus norvegicus OX=10116 GN=Slc27a5 PE=1 SV=1 - [S27A5_RAT]	8	-1.36097	-1.00295	-1.36151	-1.90993	-1.12234	-0.586409	-0.608528	-0.768311	-1.40884	-0.771398	0.00066
D3ZAF6	ATP synthase subunit f, mitochondrial OS=Rattus norvegicus OX=10116 GN=Atp5j2 PE=1 SV=1 - [ATPK_RAT]	2	-0.636493	-0.163802	-0.297399	-0.884139	-0.863301	-0.722735	-0.854866	-0.660878	-0.495458	-0.775445	1.5e-05
B5DEN5	Eukaryotic translation elongation factor 1 beta 2 OS=Rattus norvegicus OX=10116 GN=Eef1b2 PE=1 SV=1 - [B5DEN5_RAT]	14	0.217011	0.126351	-0.483216	-0.272675	-0.585568	-0.826919	-0.827281	-0.862429	-0.103132	-0.775549	4e-05
D4A3E2	Aminopeptidase-like 1 OS=Rattus norvegicus OX=10116 GN=Npepl1 PE=1 SV=2 - [D4A3E2_RAT]	10	-0.0349915	-0.250799	-0.668224	-0.424707	-0.745737	-0.90812	-0.7112	-0.738685	-0.34468	-0.775935	1e-05
B2RZD5	RCG41580, isoform CRA_a OS=Rattus norvegicus OX=10116 GN=Rpl22l1 PE=2 SV=1 - [B2RZD5_RAT]	3	-0.90861	-0.732534	-0.80253	-0.561577	-0.683934	-0.74238	-0.810959	-0.869795	-0.751313	-0.776767	8e-06
A0A0G2K7X3	Nuclear ubiquitous casein and cyclin-dependent kinase substrate 1 OS=Rattus norvegicus OX=10116 GN=Nucks1 PE=1 SV=1 - [A0A0G2K7X3_RAT]	6	-0.210421	-0.246393	-0.111949	0.169054	-0.177005	-0.946585	-0.984101	-1.00536	-0.0999274	-0.778261	0.004902
G3V7Q8	Cationic trypsinogen OS=Rattus norvegicus OX=10116 GN=Prss3b PE=3 SV=1 - [G3V7Q8_RAT]	3	-0.938799	-0.798775	-0.817215	-0.270773	-0.681992	-0.824177	-0.838518	-0.771632	-0.70639	-0.77908	4e-06
Q9JI04	Alpha 4 type V collagen OS=Rattus norvegicus OX=10116 GN=Col5a3 PE=2 SV=1 - [Q9JI04_RAT]	3	-1.32505	-1.12439	-0.769181	-0.981756	-0.909435	-0.652643	-0.692765	-0.862974	-1.05009	-0.779454	4.1e-05
P09811	Glycogen phosphorylase, liver form OS=Rattus norvegicus OX=10116 GN=Pygl PE=1 SV=5 - [PYGL_RAT]	24	-0.269825	-0.385965	-0.712398	-1.11538	-0.897548	-0.747518	-0.805821	-0.667896	-0.620893	-0.779696	1.4e-05
D3ZGY1	PYM homolog 1, exon junction complex-associated factor OS=Rattus norvegicus OX=10116 GN=Pym1 PE=1 SV=1 - [D3ZGY1_RAT]	3	-0.285919	-0.398488	-0.760008	-0.299614	-0.539457	-0.845205	-0.91891	-0.824097	-0.436008	-0.781918	0.000121
P43165	Carbonic anhydrase 5A, mitochondrial OS=Rattus norvegicus OX=10116 GN=Ca5a PE=1 SV=1 - [CAH5A_RAT]	3	-0.205753	-0.141512	0.0601911	-0.553117	-0.766696	-0.658613	-0.842574	-0.859808	-0.210048	-0.781923	1e-05
Q5XIA8	Growth hormone-inducible transmembrane protein OS=Rattus norvegicus OX=10116 GN=Ghitm PE=2 SV=1 - [GHITM_RAT]	4	-0.65725	-0.136453	-0.372044	-0.735923	-0.752515	-0.756738	-0.800053	-0.822202	-0.475418	-0.782877	<0.000001
B4F7A1	Complex III assembly factor LYRM7 OS=Rattus norvegicus OX=10116 GN=Lyrm7 PE=3 SV=1 - [LYRM7_RAT]	2	-0.154053	0.298825	-0.578587	-0.068552	-0.436318	-0.927225	-0.844511	-0.93878	-0.125592	-0.786709	0.000519
Q5U2U8	Bcl2-associated athanogene 3 OS=Rattus norvegicus OX=10116 GN=Bag3 PE=1 SV=1 - [Q5U2U8_RAT]	2	-0.553194	1.92392	1.333	0.295324	-0.530888	-0.742646	-0.841717	-1.03753	0.749762	-0.788196	0.000325
D3ZAF5	Periostin OS=Rattus norvegicus OX=10116 GN=Postn PE=1 SV=1 - [D3ZAF5_RAT]	3	-1.3621	-1.02271	-0.96151	-1.14277	-0.820282	-0.77973	-0.748115	-0.810345	-1.12227	-0.789618	<0.000001
P70473	Alpha-methylacyl-CoA racemase OS=Rattus norvegicus OX=10116 GN=Amacr PE=1 SV=3 - [AMACR_RAT]	10	-0.0753521	-0.453634	-0.0447392	-0.619594	-0.8647	-0.718047	-0.804552	-0.772956	-0.29833	-0.790064	2e-06
D3ZMX6	Syntrophin, beta 2 OS=Rattus norvegicus OX=10116 GN=Sntb2 PE=1 SV=3 - [D3ZMX6_RAT]	2	-0.656569	0	-0.0687655	0	0	-0.852378	-0.378489	-1.94672	-0.181334	-0.794396	0.020715
P28037	Cytosolic 10-formyltetrahydrofolate dehydrogenase OS=Rattus norvegicus OX=10116 GN=Aldh1l1 PE=1 SV=3 - [AL1L1_RAT]	22	-0.35643	-0.325316	-0.654938	-1.18988	-0.917644	-0.758062	-0.759541	-0.743731	-0.631642	-0.794745	7e-06
A0JPM9	Eukaryotic translation initiation factor 3 subunit J OS=Rattus norvegicus OX=10116 GN=Eif3j PE=1 SV=1 - [EIF3J_RAT]	8	-0.622117	-0.559389	-0.6533	-0.536368	-0.69292	-0.860519	-0.809891	-0.820818	-0.592793	-0.796037	4e-06
D4ABA5	RCG35999, isoform CRA_a OS=Rattus norvegicus OX=10116 GN=Smtn PE=1 SV=1 - [D4ABA5_RAT]	7	-0.931288	-0.959978	-1.03925	-1.02191	-0.90873	-0.717335	-0.719487	-0.841912	-0.988108	-0.796866	1.1e-05
G3V793	Protein CASC3 OS=Rattus norvegicus OX=10116 GN=Casc3 PE=1 SV=2 - [G3V793_RAT]	3	-0.0900884	-0.204113	-0.475859	-0.368863	-0.789321	-0.75986	-0.752505	-0.889057	-0.284731	-0.797686	3e-06
Q498S8	Frizzled-8 OS=Rattus norvegicus OX=10116 GN=Fzd8 PE=2 SV=1 - [FZD8_RAT]	2	-0.262553	-0.221036	-0.40528	-0.854136	-0.764025	-1.05568	-0.801895	-0.577256	-0.435751	-0.799714	0.000227
B0BNL8	Agpat3 protein (Fragment) OS=Rattus norvegicus OX=10116 GN=Agpat3 PE=2 SV=1 - [B0BNL8_RAT]	5	-1.23003	0.145356	-0.134813	-1.31226	-0.820608	-0.79966	-0.72305	-0.85559	-0.632937	-0.799727	2e-06
P12001	60S ribosomal protein L18 OS=Rattus norvegicus OX=10116 GN=Rpl18 PE=1 SV=2 - [RL18_RAT]	7	-1.34658	0.0342878	-0.711991	-0.804339	-0.767943	-0.805411	-0.726807	-0.903437	-0.707155	-0.800899	4e-06
D4A7M6	Ribonucleotide reductase M2 polypeptide OS=Rattus norvegicus OX=10116 GN=LOC100359539 PE=1 SV=1 - [D4A7M6_RAT]	3	-0.0953775	-0.715606	-0.899366	-0.563096	-0.732906	-0.47688	-0.931735	-1.06525	-0.568362	-0.801694	0.000677
O35826	Bifunctional UDP-N-acetylglucosamine 2-epimerase/N-acetylmannosamine kinase OS=Rattus norvegicus OX=10116 GN=Gne PE=1 SV=1 - [GLCNE_RAT]	4	-0.680795	-0.419375	-0.800143	-1.34662	-1.07954	-0.587532	-0.814502	-0.726434	-0.811732	-0.802002	0.000266
Q3MIB4	Lon protease homolog 2, peroxisomal OS=Rattus norvegicus OX=10116 GN=Lonp2 PE=1 SV=2 - [LONP2_RAT]	9	-1.02105	-0.227404	-0.678461	-0.723937	-0.606029	-0.852733	-0.916086	-0.834217	-0.662713	-0.802266	4.5e-05
D3ZCE7	Similar to chromosome 14 open reading frame 8 (Predicted) OS=Rattus norvegicus OX=10116 GN=Tppp2 PE=4 SV=1 - [D3ZCE7_RAT]	2	-1.38738	0	0.171071	0	-0.897277	-0.886533	-1.24148	-0.194314	-0.304078	-0.8049	0.006235
P13383	Nucleolin OS=Rattus norvegicus OX=10116 GN=Ncl PE=1 SV=3 - [NUCL_RAT]	34	-0.368896	-0.188103	-0.535949	-0.0108495	-0.523541	-0.88754	-0.902621	-0.912171	-0.275949	-0.806468	0.000186
P60825	Cold-inducible RNA-binding protein OS=Rattus norvegicus OX=10116 GN=Cirbp PE=2 SV=1 - [CIRBP_RAT]	5	-0.555935	-0.581152	-0.962826	-0.32867	-0.640972	-0.751648	-0.99357	-0.842303	-0.607146	-0.807123	6.6e-05
Q68FR7	Protein LTV1 homolog OS=Rattus norvegicus OX=10116 GN=Ltv1 PE=2 SV=1 - [LTV1_RAT]	3	-0.455708	-0.405716	-0.787424	-0.0163053	-0.45656	-0.875891	-1.13726	-0.759695	-0.416288	-0.807353	0.000982
A0A140TAE1	Fatty acid desaturase 2 OS=Rattus norvegicus OX=10116 GN=Fads2 PE=1 SV=1 - [A0A140TAE1_RAT]	3	-1.62642	-1.1252	-0.452674	-0.777353	-0.958119	-0.809449	-0.600041	-0.880872	-0.995411	-0.81212	7.5e-05
P05426	60S ribosomal protein L7 OS=Rattus norvegicus OX=10116 GN=Rpl7 PE=1 SV=2 - [RL7_RAT]	2	-1.04048	0.061827	-0.325369	-0.704241	-0.784928	-0.841451	-0.864313	-0.763608	-0.502067	-0.813575	<0.000001
A0A0G2JZ04	Zinc finger CCHC-type containing 11 OS=Rattus norvegicus OX=10116 GN=Tut4 PE=1 SV=1 - [A0A0G2JZ04_RAT]	4	-0.506439	-0.331486	-0.192541	-0.0134063	-0.411555	-0.797354	-1.09971	-0.954046	-0.260968	-0.815666	0.001184
A0A0H2UHH9	40S ribosomal protein S24 OS=Rattus norvegicus OX=10116 GN=Rps24 PE=3 SV=1 - [A0A0H2UHH9_RAT]	3	-0.949036	0.079375	-0.999446	-1.07923	-0.779927	-0.902637	-0.782515	-0.797708	-0.737084	-0.815697	2e-06
O55171	Acyl-coenzyme A thioesterase 2, mitochondrial OS=Rattus norvegicus OX=10116 GN=Acot2 PE=1 SV=1 - [ACOT2_RAT]	7	-0.433986	-0.0796284	-0.433999	-0.858077	-0.619445	-0.814856	-0.824337	-1.00669	-0.451423	-0.816333	8.5e-05
Q64550	UDP-glucuronosyltransferase 1-1 OS=Rattus norvegicus OX=10116 GN=Ugt1a1 PE=1 SV=1 - [UD11_RAT]	2	-1.06197	-0.681372	-0.306901	-0.845359	-0.839636	-0.769084	-0.801749	-0.89859	-0.7239	-0.827265	1e-06
Q499N6	UBX domain-containing protein 1 OS=Rattus norvegicus OX=10116 GN=Ubxn1 PE=3 SV=2 - [UBXN1_RAT]	7	-0.397246	-0.296865	-0.933939	-0.575917	-0.721483	-0.880621	-0.885456	-0.822565	-0.550992	-0.827531	5e-06
A0A0G2K0N6	Uncharacterized protein OS=Rattus norvegicus OX=10116 PE=1 SV=1 - [A0A0G2K0N6_RAT]	3	-0.0572512	-0.59756	-0.45084	-0.602037	-0.739206	-0.827623	-0.967779	-0.776053	-0.426922	-0.827665	1.2e-05
Q3MIE1	Mpnd protein (Fragment) OS=Rattus norvegicus OX=10116 GN=Mpnd PE=2 SV=1 - [Q3MIE1_RAT]	2	-0.741676	-1.16578	-0.92423	-1.9301	-1.36322	-0.731827	-0.837276	-0.386424	-1.19045	-0.829687	0.003891
P31232	Transgelin OS=Rattus norvegicus OX=10116 GN=Tagln PE=1 SV=2 - [TAGL_RAT]	10	-1.42123	-1.4247	-1.05963	-0.860873	-0.938367	-0.832775	-0.764741	-0.784242	-1.19161	-0.830031	5e-06
F1LRM7	Collagen alpha-1(II) chain OS=Rattus norvegicus OX=10116 GN=Col2a1 PE=1 SV=1 - [F1LRM7_RAT]	12	-1.74306	-1.31734	-1.12733	-1.6316	-1.02802	-0.815243	-0.734499	-0.749361	-1.45483	-0.83178	4.3e-05
D3Z8I7	Glutathione S-transferase, theta 3 OS=Rattus norvegicus OX=10116 GN=Gstt3 PE=1 SV=1 - [D3Z8I7_RAT]	2	0.123145	-0.484819	-0.639787	-1.20658	-1.03369	-0.827331	-0.755054	-0.712792	-0.552009	-0.832217	4.7e-05
P21571	ATP synthase-coupling factor 6, mitochondrial OS=Rattus norvegicus OX=10116 GN=Atp5j PE=1 SV=1 - [ATP5J_RAT]	8	-0.111223	-0.0192511	-0.318191	-0.409328	-0.721628	-0.878448	-0.877378	-0.854908	-0.214498	-0.83309	4e-06
P13668	Stathmin OS=Rattus norvegicus OX=10116 GN=Stmn1 PE=1 SV=2 - [STMN1_RAT]	10	-0.331828	-0.41111	-0.838533	-0.382393	-0.686124	-0.842531	-0.932962	-0.883143	-0.490966	-0.83619	1.4e-05
A0A0G2K0Q7	Myosin light chain kinase OS=Rattus norvegicus OX=10116 GN=Mylk PE=1 SV=1 - [A0A0G2K0Q7_RAT]	24	-1.07386	-1.06222	-1.08159	-0.788161	-0.874387	-0.818952	-0.865438	-0.812127	-1.00146	-0.842726	<0.000001
O70127	Bile salt export pump OS=Rattus norvegicus OX=10116 GN=Abcb11 PE=1 SV=1 - [ABCBB_RAT]	17	-1.46633	-0.644963	-0.743473	-1.48063	-1.00018	-0.762837	-0.819123	-0.796061	-1.08385	-0.84455	1.4e-05
D3ZT47	Family with sequence similarity 171, member A2 OS=Rattus norvegicus OX=10116 GN=Fam171a2 PE=1 SV=2 - [D3ZT47_RAT]	3	-0.925385	0	-2.116	-0.343687	0	-1.95734	-1.43402	0	-0.846267	-0.84784	0.000462
P17078	60S ribosomal protein L35 OS=Rattus norvegicus OX=10116 GN=Rpl35 PE=1 SV=3 - [RL35_RAT]	2	-0.581814	0.0614105	-0.933984	-1.02691	-0.80189	-0.811749	-0.922439	-0.866552	-0.620324	-0.850658	1e-06
Q8VHK7	Hepatoma-derived growth factor OS=Rattus norvegicus OX=10116 GN=Hdgf PE=1 SV=2 - [HDGF_RAT]	10	-0.397882	-0.471438	-0.677471	-0.132588	-0.587826	-0.915422	-1.00865	-0.892126	-0.419845	-0.851005	0.000122
P69736	Endothelial differentiation-related factor 1 OS=Rattus norvegicus OX=10116 GN=Edf1 PE=1 SV=1 - [EDF1_RAT]	4	-0.72183	-0.60568	-1.09606	-0.353611	-0.69708	-0.922717	-0.895588	-0.897875	-0.694295	-0.853315	1.3e-05
M0R5M7	Transcription factor BTF3 OS=Rattus norvegicus OX=10116 GN=rCG_63270 PE=3 SV=1 - [M0R5M7_RAT]	6	-0.258962	-0.117472	-0.586955	-0.301725	-0.528754	-0.906693	-0.973121	-1.01799	-0.316278	-0.856639	0.000279
Q66H39	ATP-binding cassette sub-family F member 3 OS=Rattus norvegicus OX=10116 GN=Abcf3 PE=2 SV=1 - [ABCF3_RAT]	2	-0.925997	-0.39744	-0.318127	-0.317257	-0.668883	-1.00707	-0.504472	-1.26987	-0.489705	-0.862575	0.001757
D3ZJB1	Microfibril-associated protein 5 OS=Rattus norvegicus OX=10116 GN=Mfap5 PE=4 SV=1 - [D3ZJB1_RAT]	2	-2.03485	-1.57912	-0.851446	-0.775725	-0.696465	-0.737454	-1.07482	-0.941562	-1.31029	-0.862576	9.5e-05
D3ZIL9	DIS3-like exonuclease 2 OS=Rattus norvegicus OX=10116 GN=Dis3l2 PE=1 SV=2 - [D3ZIL9_RAT]	3	-0.676976	-0.630902	-0.765058	-0.404179	-0.714303	-0.943976	-0.982344	-0.824707	-0.619279	-0.866333	2.3e-05
B2RYP3	Fam91a1 protein OS=Rattus norvegicus OX=10116 GN=Fam91a1 PE=1 SV=1 - [B2RYP3_RAT]	2	-1.57921	1.02098	-0.351693	-1.70822	-0.84439	-1.13413	-0.705401	-0.783251	-0.654536	-0.866792	0.000121
Q5QD51	A-kinase anchor protein 12 OS=Rattus norvegicus OX=10116 GN=Akap12 PE=1 SV=1 - [AKA12_RAT]	23	-1.31804	-1.26904	-1.03495	-0.67627	-0.86533	-0.929635	-0.787593	-0.886771	-1.07457	-0.867332	1e-06
Q5M7V3	LOC367586 protein OS=Rattus norvegicus OX=10116 GN=LOC367586 PE=2 SV=1 - [Q5M7V3_RAT]	9	-1.01249	-1.03338	-1.23675	-1.04937	-0.85262	-0.870676	-0.852641	-0.894752	-1.083	-0.867672	<0.000001
Q56AP7	Protein cereblon OS=Rattus norvegicus OX=10116 GN=Crbn PE=1 SV=1 - [CRBN_RAT]	2	0	0	0.389296	0	0	0	-1.86332	-1.61289	0.0973239	-0.869053	4.7e-05
G3V7A3	Serine (Or cysteine) peptidase inhibitor, clade I, member 2 OS=Rattus norvegicus OX=10116 GN=Serpini2 PE=3 SV=1 - [G3V7A3_RAT]	2	0.359779	0.150375	-1.10172	-0.346099	-0.545291	-0.910598	-1.01981	-1.00214	-0.234417	-0.86946	0.000242
O89035	Mitochondrial dicarboxylate carrier OS=Rattus norvegicus OX=10116 GN=Slc25a10 PE=1 SV=1 - [O89035_RAT]	4	-1.3031	-0.29648	-0.787686	-1.08787	-0.906853	-0.858826	-0.825392	-0.89312	-0.868784	-0.871048	<0.000001
Q6W3B0	Desmoglein-4 OS=Rattus norvegicus OX=10116 GN=Dsg4 PE=1 SV=1 - [DSG4_RAT]	2	-1.18327	0.545742	-0.354739	-1.35175	-0.907965	-0.923509	-0.842676	-0.816947	-0.586004	-0.872774	<0.000001
Q66HI5	Ferritin OS=Rattus norvegicus OX=10116 GN=Fth1 PE=1 SV=2 - [Q66HI5_RAT]	11	0.286245	0.140722	-0.121436	-0.594794	-0.847732	-0.911427	-0.881608	-0.86796	-0.0723155	-0.877182	<0.000001
O35186	Cathepsin K OS=Rattus norvegicus OX=10116 GN=Ctsk PE=2 SV=1 - [CATK_RAT]	3	-0.919169	-0.999743	-0.856388	-0.760762	-1.06989	-0.927975	-0.78577	-0.737831	-0.884015	-0.880366	4.6e-05
D3ZBE8	UPF3B, regulator of nonsense mediated mRNA decay OS=Rattus norvegicus OX=10116 GN=Upf3b PE=1 SV=1 - [D3ZBE8_RAT]	2	-0.551624	0.047985	0.231362	-0.0991398	-0.733006	-1.40137	-0.790037	-0.599259	-0.0928541	-0.880919	0.001836
Q5XIM5	Protein CDV3 homolog OS=Rattus norvegicus OX=10116 GN=Cdv3 PE=1 SV=1 - [CDV3_RAT]	12	-0.00966657	-0.0318083	-0.571989	-0.313431	-0.688477	-0.996584	-0.953033	-0.896168	-0.231724	-0.883565	3.2e-05
A0A0G2JW88	Microtubule-associated protein OS=Rattus norvegicus OX=10116 GN=Map4 PE=1 SV=1 - [A0A0G2JW88_RAT]	15	-1.00322	-0.108267	-0.48128	-0.117618	-0.708965	-0.854634	-0.975276	-1.00066	-0.427597	-0.884883	3e-05
A0A140TAJ5	Phosphatidylinositol 4-kinase alpha OS=Rattus norvegicus OX=10116 GN=Pi4ka PE=1 SV=1 - [A0A140TAJ5_RAT]	2	-0.733739	0	-0.334422	0	-1.20592	-0.734004	-0.830088	-0.774918	-0.26704	-0.886232	0.000233
D4A702	Synaptopodin-2 OS=Rattus norvegicus OX=10116 GN=Synpo2 PE=1 SV=2 - [SYNP2_RAT]	18	-1.95931	-0.0823744	-0.731702	-1.09396	-0.89708	-0.892455	-0.90537	-0.858449	-0.966836	-0.888339	<0.000001
A0A0G2JW03	Lipin 1 OS=Rattus norvegicus OX=10116 GN=Lpin1 PE=1 SV=1 - [A0A0G2JW03_RAT]	2	-0.587306	0.0292616	-0.604453	-0.527864	-0.933784	-1.07712	-0.90697	-0.635851	-0.42259	-0.888432	0.000103
F1LZJ4	Putative hydroxypyruvate isomerase OS=Rattus norvegicus OX=10116 GN=Hyi PE=1 SV=2 - [F1LZJ4_RAT]	13	-0.235999	-0.563604	-0.679392	-0.629689	-0.886281	-0.97787	-0.939655	-0.758717	-0.527171	-0.890631	8e-06
G3V8J2	Cytochrome P450 family 8 subfamily B member 1 OS=Rattus norvegicus OX=10116 GN=Cyp8b1 PE=1 SV=1 - [G3V8J2_RAT]	9	-0.978277	-0.00982613	-0.302381	-1.26487	-1.09008	-0.895085	-0.779032	-0.801956	-0.638839	-0.891539	3.6e-05
D4A5F4	Hypothetical LOC289568 OS=Rattus norvegicus OX=10116 GN=RGD1311575 PE=1 SV=3 - [D4A5F4_RAT]	3	-0.622642	-0.608239	-0.390264	-0.894797	-0.519163	-0.854409	-0.802851	-1.39262	-0.628985	-0.892261	0.001917
P62961	Nuclease-sensitive element-binding protein 1 OS=Rattus norvegicus OX=10116 GN=Ybx1 PE=2 SV=3 - [YBOX1_RAT]	6	-0.812186	-0.179783	-0.825267	-0.476261	-0.735121	-0.870188	-0.986458	-0.983135	-0.573374	-0.893726	1.7e-05
M0R776	Mitochondrial ribosomal protein S36 OS=Rattus norvegicus OX=10116 GN=Mrps36 PE=1 SV=1 - [M0R776_RAT]	4	-0.624358	-0.251788	-0.532057	-0.453277	-0.798125	-1.00717	-0.879552	-0.903227	-0.46537	-0.897019	5e-06
D3ZJ17	Tubulin tyrosine ligase-like 6 OS=Rattus norvegicus OX=10116 GN=Ttll6 PE=4 SV=2 - [D3ZJ17_RAT]	2	-1.81892	-1.31584	-1.03036	-1.22928	-1.3349	-0.369816	-0.314042	-1.57564	-1.3486	-0.898601	0.016943
Q63276	Bile acid-CoA:amino acid N-acyltransferase OS=Rattus norvegicus OX=10116 GN=Baat PE=1 SV=2 - [BAAT_RAT]	6	-1.05047	-0.998734	-0.421625	-0.642057	-0.917279	-0.942015	-0.802631	-0.946265	-0.778221	-0.902047	2e-06
A0A0G2JXM2	Cyclin-T1-like OS=Rattus norvegicus OX=10116 GN=LOC103692976 PE=4 SV=1 - [A0A0G2JXM2_RAT]	4	-0.40113	-0.443364	-0.861732	-0.635043	-0.786392	-1.06945	-0.684159	-1.07148	-0.585317	-0.902871	0.000137
Q5M949	Nipsnap homolog 3A (C. elegans) OS=Rattus norvegicus OX=10116 GN=Nipsnap3b PE=1 SV=1 - [Q5M949_RAT]	5	-0.683268	-0.870362	-0.904395	-0.644142	-0.89801	-0.906475	-0.844761	-0.965437	-0.775542	-0.903671	<0.000001
H2BF30	Fatty acid desaturase 1 OS=Rattus norvegicus OX=10116 GN=Fads1 PE=2 SV=1 - [H2BF30_RAT]	3	-1.36616	-1.11042	-0.859644	-1.44015	-1.09469	-0.985569	-0.853176	-0.683621	-1.19409	-0.904264	8.8e-05
P50411	Protein phosphatase inhibitor 2 OS=Rattus norvegicus OX=10116 GN=Ppp1r2 PE=1 SV=2 - [IPP2_RAT]	4	-0.257231	-0.206245	-1.1576	-0.672172	-1.04634	-1.05787	-0.787235	-0.728906	-0.573311	-0.905087	7.5e-05
P18163	Long-chain-fatty-acid--CoA ligase 1 OS=Rattus norvegicus OX=10116 GN=Acsl1 PE=1 SV=1 - [ACSL1_RAT]	32	-1.35707	-0.501189	-0.603703	-1.36089	-1.09657	-0.83332	-0.868059	-0.824552	-0.955714	-0.905624	2.6e-05
D4A412	Uncharacterized protein OS=Rattus norvegicus OX=10116 PE=4 SV=1 - [D4A412_RAT]	2	-1.75369	-0.249802	-1.005	-1.69452	-1.06943	-0.929643	-0.71732	-0.911979	-1.17575	-0.907093	3.6e-05
D4A6X4	Acylphosphatase OS=Rattus norvegicus OX=10116 GN=Acyp1 PE=1 SV=1 - [D4A6X4_RAT]	2	0.236577	0.0728145	-0.410272	0.153134	-0.52601	-1.18444	-1.27521	-0.656512	0.0130635	-0.910543	0.001916
Q9QZ76	Myoglobin OS=Rattus norvegicus OX=10116 GN=Mb PE=1 SV=3 - [MYG_RAT]	3	-1.29529	1.46366	0.261126	-0.565891	-0.70387	-0.917485	-1.00463	-1.0266	-0.0340999	-0.913145	4.1e-05
A0A0G2K8Q7	U6 snRNA-associated Sm-like protein LSm2 OS=Rattus norvegicus OX=10116 GN=Lsm2 PE=1 SV=1 - [A0A0G2K8Q7_RAT]	4	-0.701373	-0.630278	-0.661697	0.126172	-0.47732	-1.00799	-1.0497	-1.13177	-0.466794	-0.916695	0.000707
D3ZP49	Coiled-coil domain-containing protein 72-like OS=Rattus norvegicus OX=10116 GN=LOC100910678 PE=4 SV=2 - [D3ZP49_RAT]	2	-0.651238	-0.490801	-0.6983	-0.224026	-0.638218	-0.972242	-1.10462	-0.958085	-0.516091	-0.918292	0.000121
P80299	Bifunctional epoxide hydrolase 2 OS=Rattus norvegicus OX=10116 GN=Ephx2 PE=1 SV=1 - [HYES_RAT]	20	-0.539943	-0.0335829	-0.191925	-0.707089	-0.932774	-0.919992	-0.930029	-0.90238	-0.368135	-0.921294	<0.000001
Q62651	Delta(3,5)-Delta(2,4)-dienoyl-CoA isomerase, mitochondrial OS=Rattus norvegicus OX=10116 GN=Ech1 PE=1 SV=2 - [ECH1_RAT]	20	-0.478857	-0.502857	-0.535475	-0.515669	-0.836959	-0.957237	-0.936441	-0.977386	-0.508214	-0.927006	1e-06
P19112	Fructose-1,6-bisphosphatase 1 OS=Rattus norvegicus OX=10116 GN=Fbp1 PE=1 SV=2 - [F16P1_RAT]	20	-0.00256069	-0.900324	-0.72326	-1.0599	-1.07218	-0.918577	-0.898655	-0.834552	-0.67151	-0.930992	8e-06
A0A096MIS3	Translation initiation factor eIF-2B subunit delta OS=Rattus norvegicus OX=10116 GN=Eif2b4 PE=1 SV=2 - [A0A096MIS3_RAT]	4	-0.864553	-0.355595	-0.841089	-1.13068	-0.760854	-0.852122	-1.09099	-1.06227	-0.797979	-0.94156	4.9e-05
P04176	Phenylalanine-4-hydroxylase OS=Rattus norvegicus OX=10116 GN=Pah PE=1 SV=3 - [PH4H_RAT]	6	-0.14561	-0.484141	-0.555114	-1.61436	-1.31898	-0.784285	-0.845474	-0.821649	-0.699806	-0.942598	0.000322
M0RA15	Uncharacterized protein OS=Rattus norvegicus OX=10116 PE=4 SV=1 - [M0RA15_RAT]	2	-0.837743	-1.0432	-1.39251	-0.149676	-0.726024	-1.08079	-1.07216	-0.935926	-0.855782	-0.953725	4.9e-05
P01015	Angiotensinogen OS=Rattus norvegicus OX=10116 GN=Agt PE=1 SV=1 - [ANGT_RAT]	7	-0.867202	-1.43302	-0.454355	-0.92308	-1.04187	-0.970963	-0.943004	-0.873542	-0.919415	-0.957344	2e-06
D3ZE04	Collagen type VII alpha 1 chain OS=Rattus norvegicus OX=10116 GN=Col7a1 PE=4 SV=2 - [D3ZE04_RAT]	2	-1.60964	-1.32305	-1.13758	-1.64373	-1.3307	-0.8577	-0.849699	-0.813474	-1.4285	-0.962893	0.00026
D3ZXP1	Tetratricopeptide repeat domain 28 OS=Rattus norvegicus OX=10116 GN=Ttc28 PE=1 SV=3 - [D3ZXP1_RAT]	2	-0.383025	-0.829086	-0.152579	0	-1.29851	-1.21527	-0.651233	-0.693194	-0.341173	-0.964552	0.001062
D3ZCG2	Kinesin family member 21A OS=Rattus norvegicus OX=10116 GN=Kif21a PE=1 SV=2 - [D3ZCG2_RAT]	5	-0.397936	-0.302085	-0.419458	-0.684844	-0.620542	-1.045	-0.966007	-1.26579	-0.451081	-0.974334	0.000363
Q66H31	Hypothetical LOC287798, isoform CRA_a OS=Rattus norvegicus OX=10116 GN=MGC95210 PE=2 SV=1 - [Q66H31_RAT]	2	-1.01925	-0.731182	-0.997095	-1.05475	-0.84648	-0.843739	-0.853895	-1.35581	-0.95057	-0.974982	0.000296
A0A0G2JXJ9	Keratin, type I cytoskeletal 14 OS=Rattus norvegicus OX=10116 GN=Krt14 PE=1 SV=1 - [A0A0G2JXJ9_RAT]	2	-1.51219	-1.88456	-1.52215	-1.24952	-1.30584	-1.01589	-0.780266	-0.819405	-1.54211	-0.98035	0.000223
D3ZXK3	Transforming, acidic coiled-coil-containing protein 2 OS=Rattus norvegicus OX=10116 GN=Tacc2 PE=1 SV=1 - [D3ZXK3_RAT]	4	-0.958024	0.436064	-0.534205	-0.635107	-0.845301	-1.01672	-1.09631	-0.963719	-0.422818	-0.98051	8e-06
F1LZ34	S-adenosylmethionine synthase OS=Rattus norvegicus OX=10116 GN=Mat1a PE=1 SV=3 - [F1LZ34_RAT]	8	-0.477165	-0.994784	-0.737284	-1.16824	-1.02785	-0.90129	-0.931806	-1.06782	-0.844368	-0.982192	3e-06
D4A5E5	Sarcoglycan, beta OS=Rattus norvegicus OX=10116 GN=Sgcb PE=4 SV=2 - [D4A5E5_RAT]	2	-1.1615	0	-0.333429	0	0	-1.20079	-1.44559	-1.28701	-0.373732	-0.983349	1.5e-05
D3ZII8	SET and MYND domain containing 5 (Predicted) OS=Rattus norvegicus OX=10116 GN=Smyd5 PE=1 SV=2 - [D3ZII8_RAT]	2	0.632634	-0.918445	-0.270898	0	-1.5344	-0.818293	-0.873567	-0.725398	-0.139177	-0.987915	0.001288
G3V778	Pyruvate dehydrogenase kinase, isoenzyme 4 OS=Rattus norvegicus OX=10116 GN=Pdk4 PE=1 SV=1 - [G3V778_RAT]	3	-1.19513	-0.712857	-0.889953	-0.899919	-0.906093	-0.969048	-1.01677	-1.06031	-0.924466	-0.988054	1e-06
P09650	Mast cell protease 1 OS=Rattus norvegicus OX=10116 GN=Mcpt1 PE=1 SV=3 - [MCPT1_RAT]	2	-0.735252	-0.499641	-0.359827	-0.203866	-0.871192	-1.17086	-1.14187	-0.774408	-0.449646	-0.989581	9.3e-05
Q2PS20	Junctophilin-2 OS=Rattus norvegicus OX=10116 GN=Jph2 PE=1 SV=1 - [JPH2_RAT]	3	0	1.04935	-0.168569	0	0	-0.503812	-1.32616	-2.14228	0.220196	-0.993065	0.011079
B0BMS8	Myl9 protein OS=Rattus norvegicus OX=10116 GN=Myl9 PE=1 SV=1 - [B0BMS8_RAT]	4	-1.26273	-1.40079	-1.01924	-0.964903	-1.011	-0.952797	-1.02841	-0.984817	-1.16192	-0.994257	<0.000001
P19225	Cytochrome P450 2C70 OS=Rattus norvegicus OX=10116 GN=Cyp2c70 PE=2 SV=1 - [CP270_RAT]	4	-1.19347	-0.570848	-0.607054	-1.20163	-1.22059	-1.05106	-0.881898	-0.823799	-0.89325	-0.994337	6.3e-05
P02793	Ferritin light chain 1 OS=Rattus norvegicus OX=10116 GN=Ftl1 PE=1 SV=3 - [FRIL1_RAT]	9	0.333298	0.0508814	-0.252831	-0.697312	-0.970997	-1.02941	-1.00133	-0.977897	-0.141491	-0.994908	<0.000001
Q6P9Y4	ADP/ATP translocase 1 OS=Rattus norvegicus OX=10116 GN=Slc25a4 PE=1 SV=1 - [Q6P9Y4_RAT]	2	-1.78851	-1.97483	-0.253891	0	0	-2.15515	-1.84455	0	-1.00431	-0.999924	6.3e-05
M0R7T1	Phosphatase and actin regulator OS=Rattus norvegicus OX=10116 GN=Phactr4 PE=1 SV=2 - [M0R7T1_RAT]	5	-0.133352	-0.788212	-1.58633	-0.421885	-1.05537	-1.38391	-0.927521	-0.641717	-0.732445	-1.00213	0.000568
Q5FVN2	Transmembrane protein 41B OS=Rattus norvegicus OX=10116 GN=Tmem41b PE=2 SV=1 - [TM41B_RAT]	2	-0.83097	1.43628	0.353931	-0.237564	-1.07983	-1.41691	-0.935596	-0.58482	0.180419	-1.00429	0.000955
G3V7I6	O-acyltransferase OS=Rattus norvegicus OX=10116 GN=Soat2 PE=1 SV=1 - [G3V7I6_RAT]	2	-1.23808	0.0906246	-0.44752	-0.861918	-1.0186	-0.887431	-0.872315	-1.24317	-0.614222	-1.00538	4.7e-05
B5DF03	Peptidylprolyl isomerase (Fragment) OS=Rattus norvegicus OX=10116 GN=Fkbp3 PE=2 SV=1 - [B5DF03_RAT]	10	-1.16387	-0.487513	-1.14983	-0.760721	-0.83043	-0.989015	-1.11118	-1.09746	-0.890483	-1.00702	1.6e-05
Q6AYD6	PDZ and LIM domain protein 2 OS=Rattus norvegicus OX=10116 GN=Pdlim2 PE=1 SV=1 - [PDLI2_RAT]	3	-1.16893	-0.660606	-1.0513	-0.958328	-0.98356	-1.11834	-0.847449	-1.09572	-0.95979	-1.01127	1.3e-05
D3ZUU6	C-type lectin domain family 3, member B OS=Rattus norvegicus OX=10116 GN=Clec3b PE=1 SV=1 - [D3ZUU6_RAT]	4	-1.42789	-1.46651	-1.14068	-1.11241	-1.13685	-1.03081	-0.846588	-1.04544	-1.28687	-1.01492	1.2e-05
D3ZLT6	Kelch-like family member 31 OS=Rattus norvegicus OX=10116 GN=Klhl31 PE=4 SV=1 - [D3ZLT6_RAT]	2	-2.02974	0	0.21019	0	-1.52424	-0.924595	-1.62359	0	-0.454887	-1.01811	0.000635
P24483	Adrenodoxin, mitochondrial OS=Rattus norvegicus OX=10116 GN=Fdx1 PE=2 SV=1 - [ADX_RAT]	7	-0.170297	-0.312247	-0.502562	-0.656007	-0.867905	-1.05139	-1.10614	-1.06524	-0.410278	-1.02267	7e-06
G3V9G5	RCG24674, isoform CRA_b OS=Rattus norvegicus OX=10116 GN=Synm PE=1 SV=2 - [G3V9G5_RAT]	19	-1.1393	-0.815051	-0.812642	-0.809546	-0.796952	-1.10207	-1.16272	-1.05172	-0.894135	-1.02836	3.2e-05
Q80XX4	Musculoskeletal embryonic nuclear protein 1 OS=Rattus norvegicus OX=10116 GN=Mustn1 PE=1 SV=1 - [MSTN1_RAT]	2	-1.33879	1.38733	0.335184	-0.280141	-0.918463	-1.03519	-1.07836	-1.10621	0.0258944	-1.03456	3e-06
Q5XIF3	NADH dehydrogenase [ubiquinone] iron-sulfur protein 4, mitochondrial OS=Rattus norvegicus OX=10116 GN=Ndufs4 PE=1 SV=1 - [NDUS4_RAT]	8	-0.796564	-0.551073	-0.705542	-0.545123	-0.88168	-1.12317	-0.993364	-1.16875	-0.649576	-1.04174	1.4e-05
Q5XID1	Anamorsin OS=Rattus norvegicus OX=10116 GN=Ciapin1 PE=1 SV=1 - [CPIN1_RAT]	3	-0.415445	0.114488	-0.421742	-0.482513	-0.778725	-1.15111	-1.30114	-0.955008	-0.301303	-1.04649	0.000127
D3ZM07	MAPK-regulated co-repressor-interacting protein 2 OS=Rattus norvegicus OX=10116 GN=Mcrip2 PE=1 SV=1 - [D3ZM07_RAT]	2	-0.398546	-0.0648184	-0.753912	-0.916033	-0.944251	-0.956437	-1.14315	-1.14281	-0.533327	-1.04666	7e-06
Q5RKH5	Phosphorylase b kinase regulatory subunit OS=Rattus norvegicus OX=10116 GN=Phkb PE=1 SV=1 - [Q5RKH5_RAT]	2	-1.73814	0	-0.547175	0	-1.56382	-1.29439	-1.33308	0	-0.571328	-1.04782	1.9e-05
M0RC65	Cofilin 2 OS=Rattus norvegicus OX=10116 GN=Cfl2 PE=1 SV=1 - [M0RC65_RAT]	10	-1.42276	-0.160691	-0.695585	-0.819655	-0.931459	-1.03416	-1.10379	-1.13541	-0.774672	-1.0512	4e-06
Q2MH90	14.7K-interacting protein-2 type B variant (Fragment) OS=Rattus norvegicus OX=10116 GN=FIP-2B variant PE=2 SV=1 - [Q2MH90_RAT]	12	-0.230161	-0.53581	-1.11619	-0.982762	-0.945702	-1.02014	-1.11125	-1.13272	-0.716232	-1.05245	3e-06
B0BNB2	Density-regulated protein OS=Rattus norvegicus OX=10116 GN=Denr PE=2 SV=1 - [B0BNB2_RAT]	4	-0.860175	-0.697415	-0.845938	-0.683467	-0.932899	-1.04327	-1.11831	-1.14835	-0.771749	-1.06071	4e-06
P09875	UDP-glucuronosyltransferase 2B1 OS=Rattus norvegicus OX=10116 GN=Ugt2b1 PE=2 SV=1 - [UD2B1_RAT]	5	-2.47814	-2.27872	-2.09341	-2.19416	-1.38994	-0.995911	-0.958094	-0.954713	-2.26111	-1.07466	8.6e-05
Q7M0C4	Cytochrome P450 2B4 (Fragments) OS=Rattus norvegicus OX=10116 PE=4 SV=1 - [Q7M0C4_RAT]	5	-0.849816	-0.365981	-0.490905	-1.08398	-1.14507	-1.04586	-1.13492	-0.972901	-0.69767	-1.07469	2e-06
Q5M9I5	Cytochrome b-c1 complex subunit 6, mitochondrial OS=Rattus norvegicus OX=10116 GN=Uqcrh PE=3 SV=1 - [QCR6_RAT]	3	-0.360449	-0.104929	-0.46314	-0.269384	-0.688021	-1.35441	-1.18612	-1.08898	-0.299475	-1.07938	0.000281
Q923Z2	Tropomyosin 1, alpha, isoform CRA_a OS=Rattus norvegicus OX=10116 GN=Tpm1 PE=1 SV=1 - [Q923Z2_RAT]	4	-1.48265	-1.62188	-1.0824	-1.36123	-1.33394	-1.15684	-1.23435	-0.604984	-1.38704	-1.08253	0.000546
Q62785	28 kDa heat- and acid-stable phosphoprotein OS=Rattus norvegicus OX=10116 GN=Pdap1 PE=1 SV=1 - [HAP28_RAT]	10	-0.811727	-0.683749	-0.864256	-0.653534	-0.879813	-1.08958	-1.25101	-1.12477	-0.753317	-1.08629	2.3e-05
P04550	Parathymosin OS=Rattus norvegicus OX=10116 GN=Ptms PE=1 SV=2 - [PTMS_RAT]	4	-0.719009	-0.962526	-1.34448	-0.805542	-1.02512	-1.2079	-1.07372	-1.08416	-0.957889	-1.09772	2e-06
P07483	Fatty acid-binding protein, heart OS=Rattus norvegicus OX=10116 GN=Fabp3 PE=1 SV=2 - [FABPH_RAT]	6	-1.11113	0.15025	-0.509048	-0.966703	-1.06115	-1.19673	-1.06681	-1.07434	-0.609157	-1.09976	1e-06
B2GUV5	V-type proton ATPase subunit G OS=Rattus norvegicus OX=10116 GN=Atp6v1g1 PE=1 SV=1 - [B2GUV5_RAT]	2	-0.83786	-0.798654	-0.572834	-0.2647	-0.727063	-1.32591	-1.27802	-1.08242	-0.618512	-1.10335	0.000223
G3V7V6	All-trans-13,14-dihydroretinol saturase, isoform CRA_b OS=Rattus norvegicus OX=10116 GN=Retsat PE=1 SV=1 - [G3V7V6_RAT]	3	-0.968664	-0.558042	-0.518511	-0.698635	-1.00701	-1.07724	-1.19739	-1.1522	-0.685963	-1.10846	2e-06
D3ZP93	FLT3-interacting zinc finger 1 OS=Rattus norvegicus OX=10116 GN=Fiz1 PE=1 SV=1 - [D3ZP93_RAT]	2	0	-0.945089	0	-0.163322	-1.4102	-1.55571	0	-1.52018	-0.277103	-1.12152	2e-06
F7FEM5	Suprabasin OS=Rattus norvegicus OX=10116 GN=Sbsn PE=1 SV=1 - [F7FEM5_RAT]	4	-1.11384	-1.22287	-1.29444	-1.30123	-1.03592	-1.21572	-1.02181	-1.23429	-1.23309	-1.12693	6e-06
A0A0G2K0M8	Neural cell adhesion molecule 1 OS=Rattus norvegicus OX=10116 GN=Ncam1 PE=1 SV=1 - [A0A0G2K0M8_RAT]	5	-1.38663	-1.78635	-1.26866	-0.972144	-1.11337	-1.20699	-1.11514	-1.11214	-1.35345	-1.13691	<0.000001
P38062	Methionine aminopeptidase 2 OS=Rattus norvegicus OX=10116 GN=Metap2 PE=1 SV=2 - [MAP2_RAT]	4	0	-1.67552	-1.98021	0	-1.41605	-1.52497	-1.63889	0	-0.913932	-1.14498	6e-06
F1LMG2	S-methylmethionine--homocysteine S-methyltransferase BHMT2 OS=Rattus norvegicus OX=10116 GN=Bhmt2 PE=1 SV=3 - [F1LMG2_RAT]	6	0.0616833	-1.03881	-0.891598	-0.657493	-0.988281	-1.13359	-1.32856	-1.17614	-0.631553	-1.15664	1.3e-05
P55159	Serum paraoxonase/arylesterase 1 OS=Rattus norvegicus OX=10116 GN=Pon1 PE=1 SV=3 - [PON1_RAT]	4	-1.82659	-2.5645	-1.69056	-2.0934	-1.46981	-1.13218	-1.06608	-0.962248	-2.04376	-1.15758	7.5e-05
A0A0G2KB52	Microtubule-associated protein 7 OS=Rattus norvegicus OX=10116 GN=Map7 PE=1 SV=1 - [A0A0G2KB52_RAT]	5	0.10706	-0.137317	-0.539689	-0.511473	-1.57272	-1.29254	-0.954791	-0.815679	-0.270355	-1.15893	0.000469
D4A612	Elongation of very long chain fatty acids protein 2 OS=Rattus norvegicus OX=10116 GN=Elovl2 PE=1 SV=1 - [ELOV2_RAT]	2	-1.68101	-0.384789	0.354129	-1.31226	-1.73895	-1.0031	-0.854488	-1.04786	-0.755982	-1.1611	0.000902
Q63139	Sarco/endoplasmic reticulum calcium ATPase 1b (Fragment) OS=Rattus norvegicus OX=10116 PE=4 SV=2 - [Q63139_RAT]	2	-1.32876	0.422601	-0.515052	-2.15804	-1.67566	-1.04606	-1.12708	-0.807907	-0.894812	-1.16418	0.000639
F1LRS8	CD2-associated protein OS=Rattus norvegicus OX=10116 GN=Cd2ap PE=1 SV=2 - [CD2AP_RAT]	16	-0.169831	-0.18294	-0.46224	-0.147719	-0.936878	-1.14746	-1.29192	-1.31013	-0.240683	-1.1716	2.6e-05
Q4KM62	Palmdelphin OS=Rattus norvegicus OX=10116 GN=Palmd PE=1 SV=1 - [PALMD_RAT]	8	-0.698579	-0.505955	-0.730315	-0.895743	-1.14792	-1.14838	-1.22431	-1.16607	-0.707648	-1.17167	<0.000001
M0RA79	Uncharacterized protein OS=Rattus norvegicus OX=10116 PE=1 SV=1 - [M0RA79_RAT]	3	-0.577403	-0.684653	-0.831185	-1.10479	-1.35104	-1.06109	-1.05263	-1.22516	-0.799508	-1.17248	1.3e-05
Q7TQN4	RELA OS=Rattus norvegicus OX=10116 GN=Rela PE=1 SV=1 - [Q7TQN4_RAT]	2	-0.669369	-1.1409	-0.524628	0.107794	-1.00439	-0.969911	-1.43894	-1.30608	-0.556776	-1.17983	8.6e-05
D3ZIQ1	Acyl-CoA thioesterase 4 OS=Rattus norvegicus OX=10116 GN=Acot4 PE=1 SV=1 - [D3ZIQ1_RAT]	3	-1.04006	-0.93309	-0.482975	-1.02399	-1.18304	-1.12601	-1.18928	-1.23107	-0.870027	-1.18235	<0.000001
P20817	Cytochrome P450 4A14 OS=Rattus norvegicus OX=10116 GN=Cyp4a14 PE=1 SV=2 - [CP4AE_RAT]	9	-1.5115	-0.00726215	-0.565561	-1.23651	-1.1755	-1.18314	-1.25966	-1.11698	-0.830207	-1.18382	<0.000001
P24008	3-oxo-5-alpha-steroid 4-dehydrogenase 1 OS=Rattus norvegicus OX=10116 GN=Srd5a1 PE=1 SV=2 - [S5A1_RAT]	2	-1.57984	-0.530127	-0.939479	-1.15224	-1.1819	-1.31479	-1.12322	-1.11538	-1.05042	-1.18382	2e-06
G3V7S2	Neurofilament medium polypeptide OS=Rattus norvegicus OX=10116 GN=Nefm PE=1 SV=3 - [G3V7S2_RAT]	18	-2.09327	-1.58447	-1.26541	-0.881114	-1.02933	-1.26688	-1.19998	-1.24645	-1.45606	-1.18566	4e-06
D3ZIC4	Protein phosphatase 1, regulatory (Inhibitor) subunit 12B (Predicted) OS=Rattus norvegicus OX=10116 GN=Ppp1r12b PE=1 SV=1 - [D3ZIC4_RAT]	10	-1.85621	-1.01188	-1.18796	-1.30747	-1.19943	-1.18632	-1.09391	-1.29632	-1.34088	-1.19399	2e-06
F1LRL9	Microtubule-associated protein 1B OS=Rattus norvegicus OX=10116 GN=Map1b PE=1 SV=1 - [F1LRL9_RAT]	3	-1.95461	-1.20701	-0.967345	-0.972574	-1.13662	-1.2398	-1.18819	-1.22366	-1.27538	-1.19706	<0.000001
D4A5K9	Glycogen [starch] synthase OS=Rattus norvegicus OX=10116 GN=Gys2 PE=1 SV=2 - [D4A5K9_RAT]	8	-0.661387	0.00728264	-0.870496	-1.28717	-1.37662	-1.14443	-1.16425	-1.2111	-0.702942	-1.2241	4e-06
Q0D2L3	Agmatinase, mitochondrial OS=Rattus norvegicus OX=10116 GN=Agmat PE=2 SV=1 - [SPEB_RAT]	8	-0.587041	-0.861443	-0.731949	-1.04	-1.25729	-1.26644	-1.22903	-1.14564	-0.805108	-1.2246	<0.000001
P35745	Acylphosphatase-2 OS=Rattus norvegicus OX=10116 GN=Acyp2 PE=1 SV=2 - [ACYP2_RAT]	2	-0.740238	-0.197244	-0.581509	-1.13685	-1.42201	-1.27844	-1.14991	-1.09652	-0.663961	-1.23672	1e-05
D3ZAM3	Carboxypeptidase B OS=Rattus norvegicus OX=10116 GN=Cpb1 PE=4 SV=2 - [D3ZAM3_RAT]	7	-1.05062	-1.62238	-1.6858	-0.246982	-0.943801	-1.42425	-1.37757	-1.35169	-1.15145	-1.27433	5.5e-05
P23565	Alpha-internexin OS=Rattus norvegicus OX=10116 GN=Ina PE=1 SV=2 - [AINX_RAT]	6	-1.35017	-1.65349	-1.04224	-0.844693	-1.30306	-1.31332	-1.4002	-1.1693	-1.22265	-1.29647	2e-06
P54318	Pancreatic lipase-related protein 2 OS=Rattus norvegicus OX=10116 GN=Pnliprp2 PE=1 SV=1 - [LIPR2_RAT]	6	-1.12332	-1.69015	-0.882766	-0.468997	-1.303	-1.27285	-1.366	-1.25342	-1.04131	-1.29882	<0.000001
F1LNW3	Acyl-coenzyme A oxidase OS=Rattus norvegicus OX=10116 GN=Acox2 PE=1 SV=1 - [F1LNW3_RAT]	19	-1.17451	-0.260677	-0.388801	-1.01734	-1.31722	-1.33221	-1.25959	-1.29482	-0.710333	-1.30096	<0.000001
Q31267	MHC class I RT1.E OS=Rattus norvegicus OX=10116 GN=rt1-E PE=2 SV=1 - [Q31267_RAT]	2	-0.273544	-0.168965	0.523584	0.239859	-1.16593	-1.55904	-1.3628	-1.236	0.0802336	-1.33094	1.5e-05
P32198	Carnitine O-palmitoyltransferase 1, liver isoform OS=Rattus norvegicus OX=10116 GN=Cpt1a PE=1 SV=2 - [CPT1A_RAT]	9	-1.63219	-1.1182	-1.28144	-1.74797	-1.5424	-1.26259	-1.30196	-1.30121	-1.44495	-1.35204	5e-06
P21807	Peripherin OS=Rattus norvegicus OX=10116 GN=Prph PE=1 SV=1 - [PERI_RAT]	6	-2.0805	-1.98898	-1.49478	-0.741298	-1.06934	-1.40804	-1.44598	-1.53469	-1.57639	-1.36451	2.8e-05
A0A0A0MY25	Ribonuclease pancreatic beta-type OS=Rattus norvegicus OX=10116 GN=Rnase1 PE=3 SV=1 - [A0A0A0MY25_RAT]	2	-1.92459	-2.51638	-2.31499	-0.129698	-0.940643	-1.36178	-1.53295	-1.62282	-1.72141	-1.36455	0.000141
G3V7G2	Carboxylic ester hydrolase OS=Rattus norvegicus OX=10116 GN=Cel PE=3 SV=1 - [G3V7G2_RAT]	10	-2.30401	-2.84046	-2.30574	-0.0424982	-0.849787	-1.5415	-1.49225	-1.61295	-1.87317	-1.37412	0.000263
P70566	Tropomodulin-2 OS=Rattus norvegicus OX=10116 GN=Tmod2 PE=1 SV=1 - [TMOD2_RAT]	2	-1.77486	-1.65163	-1.36622	-1.78145	-1.461	-1.54142	-1.50975	-1.05148	-1.64354	-1.39091	4.3e-05
D4ABW9	Tripartite motif protein 29 (Predicted), isoform CRA_b OS=Rattus norvegicus OX=10116 GN=Trim29 PE=4 SV=1 - [D4ABW9_RAT]	4	-0.675512	-1.09526	-0.991313	-0.489642	-1.39578	-1.46633	-1.16825	-1.53611	-0.812932	-1.39162	1e-05
P00731	Carboxypeptidase A1 OS=Rattus norvegicus OX=10116 GN=Cpa1 PE=2 SV=2 - [CBPA1_RAT]	8	-1.31062	-1.37309	-1.7224	0.0869633	-1.20511	-1.43204	-1.66503	-1.27467	-1.07979	-1.39421	2.7e-05
F8WFS9	Beta-adducin OS=Rattus norvegicus OX=10116 GN=Add2 PE=1 SV=1 - [F8WFS9_RAT]	3	-0.200842	-1.04044	-0.656696	-0.257555	-1.1345	-1.62244	-1.50281	-1.48102	-0.538883	-1.43519	2.7e-05
D3ZGY2	OTU domain-containing 6B OS=Rattus norvegicus OX=10116 GN=Otud6b PE=1 SV=3 - [D3ZGY2_RAT]	4	-0.608259	-0.159644	-0.162819	-1.90045	-1.44072	-1.10798	-1.38815	-1.84985	-0.707793	-1.44668	0.000115
F1LQC1	Acyl-coenzyme A oxidase OS=Rattus norvegicus OX=10116 GN=Acox1 PE=1 SV=3 - [F1LQC1_RAT]	19	-1.57579	-1.32458	-1.2473	-1.50935	-1.61764	-1.46591	-1.25763	-1.45298	-1.41426	-1.44854	6e-06
A0A0G2K5X9	Cytochrome P450 2E1 OS=Rattus norvegicus OX=10116 GN=Cyp2e1 PE=1 SV=1 - [A0A0G2K5X9_RAT]	3	-2.3085	-1.93788	-1.64104	-2.12158	-1.75452	-1.35995	-1.38426	-1.30694	-2.00225	-1.45142	2.2e-05
P54316	Inactive pancreatic lipase-related protein 1 OS=Rattus norvegicus OX=10116 GN=Pnliprp1 PE=2 SV=1 - [LIPR1_RAT]	17	-1.3804	-2.37805	-2.28712	-0.130596	-1.02621	-1.69279	-1.57338	-1.61206	-1.54404	-1.47611	9.9e-05
P02692	Fatty acid-binding protein, liver OS=Rattus norvegicus OX=10116 GN=Fabp1 PE=1 SV=1 - [FABPL_RAT]	8	-1.11774	-1.12684	-0.821548	-0.323798	-1.09828	-1.57285	-1.62813	-1.64764	-0.847482	-1.48672	5.5e-05
D3ZSH7	Collagen type XVII alpha 1 chain OS=Rattus norvegicus OX=10116 GN=Col17a1 PE=4 SV=2 - [D3ZSH7_RAT]	2	-1.74159	-0.939542	-0.260129	-1.89148	-2.06746	-1.63445	-1.25956	-1.02378	-1.20818	-1.49631	0.00057
A0A0G2K5J0	Sulfotransferase OS=Rattus norvegicus OX=10116 GN=Sult1c3 PE=1 SV=1 - [A0A0G2K5J0_RAT]	2	-1.54641	-1.85237	-1.31726	-1.70967	-1.66162	-1.44177	-1.55205	-1.39607	-1.60643	-1.51288	2e-06
Q5XIL2	Phosphatidylinositol 4-kinase type 2-beta OS=Rattus norvegicus OX=10116 GN=Pi4k2b PE=2 SV=1 - [P4K2B_RAT]	2	-1.83125	-1.95888	-1.30529	-1.90386	-1.79919	-1.73158	-1.4473	-1.27794	-1.74982	-1.564	3.3e-05
D3ZFG3	Chymotrypsin-like elastase family, member 3B OS=Rattus norvegicus OX=10116 GN=Cela3b PE=3 SV=1 - [D3ZFG3_RAT]	5	-1.57232	-2.35415	-2.33053	-0.114133	-1.08565	-1.68967	-1.80178	-1.72103	-1.59278	-1.57454	0.000107
F1MA56	Chymotrypsinogen B OS=Rattus norvegicus OX=10116 GN=Ctrb1 PE=1 SV=1 - [F1MA56_RAT]	7	-1.85539	-1.97636	-2.16101	0.460628	-1.00401	-1.86985	-1.7902	-1.69089	-1.38303	-1.58874	0.000241
Q9JIR0	Peripheral-type benzodiazepine receptor-associated protein 1 OS=Rattus norvegicus OX=10116 GN=Tspoap1 PE=1 SV=2 - [RIMB1_RAT]	2	-1.8171	-2.77357	0.404968	0	-2.03938	-1.62262	-1.40583	-1.58818	-1.04642	-1.664	3.8e-05
Q9JJ09	Sodium-dependent phosphate transport protein 2B OS=Rattus norvegicus OX=10116 GN=Slc34a2 PE=1 SV=1 - [NPT2B_RAT]	2	-2.15054	-1.89818	-2.12667	-2.20309	-1.89957	-1.60369	-1.51068	-1.67968	-2.09462	-1.67341	6e-06
Q6P6Q2	Keratin, type II cytoskeletal 5 OS=Rattus norvegicus OX=10116 GN=Krt5 PE=1 SV=1 - [K2C5_RAT]	12	-1.59636	-1.50007	-1.55884	-1.44307	-1.59238	-1.76759	-1.77183	-1.59317	-1.52459	-1.68124	1e-06
F1M7S4	Mast cell carboxypeptidase A OS=Rattus norvegicus OX=10116 GN=Cpa3 PE=1 SV=3 - [F1M7S4_RAT]	3	-1.34495	-1.09569	0.0895969	-0.528453	-1.41813	-1.94872	-1.6884	-1.69189	-0.719875	-1.68679	1.5e-05
G3V976	Carboxypeptidase A2 OS=Rattus norvegicus OX=10116 GN=Cpa2 PE=4 SV=1 - [G3V976_RAT]	8	-1.69255	-1.49978	-1.71482	-0.300466	-1.45627	-1.64688	-1.7856	-1.86342	-1.3019	-1.68804	7e-06
P07896	Peroxisomal bifunctional enzyme OS=Rattus norvegicus OX=10116 GN=Ehhadh PE=1 SV=2 - [ECHP_RAT]	30	-2.37432	-1.53028	-1.50032	-2.27963	-1.97647	-1.77281	-1.68375	-1.68705	-1.92114	-1.78002	2e-06
P97586	Cell growth regulator with EF hand domain protein 1 OS=Rattus norvegicus OX=10116 GN=Cgref1 PE=1 SV=1 - [CGRE1_RAT]	2	-1.85037	-2.34513	-1.87087	-1.26592	-1.7214	-2.01146	-1.67601	-1.74047	-1.83307	-1.78734	3e-06
F8WG95	Galectin OS=Rattus norvegicus OX=10116 GN=Lgals7 PE=4 SV=3 - [F8WG95_RAT]	3	-1.25529	-4.41422	-0.796408	-0.80826	-1.03437	-4.66221	-0.888955	-0.727885	-1.81854	-1.82835	0.046049
Q920P6	Adenosine deaminase OS=Rattus norvegicus OX=10116 GN=Ada PE=1 SV=3 - [ADA_RAT]	14	-1.45826	-1.49356	-1.78755	-1.79795	-2.13296	-1.78751	-1.70657	-1.86205	-1.63433	-1.87227	5e-06
Q6IFV3	Keratin, type I cytoskeletal 15 OS=Rattus norvegicus OX=10116 GN=Krt15 PE=1 SV=1 - [K1C15_RAT]	9	-2.5081	-1.98407	-2.00419	-1.72928	-1.61808	-2.02365	-1.73472	-2.11887	-2.05641	-1.87383	1.5e-05
Q4FZU2	Keratin, type II cytoskeletal 6A OS=Rattus norvegicus OX=10116 GN=Krt6a PE=1 SV=1 - [K2C6A_RAT]	11	-1.74232	-1.42424	-1.63205	-1.79755	-1.86389	-1.85403	-2.11825	-1.73165	-1.64904	-1.89195	3e-06
P07379	Phosphoenolpyruvate carboxykinase, cytosolic [GTP] OS=Rattus norvegicus OX=10116 GN=Pck1 PE=1 SV=1 - [PCKGC_RAT]	8	-1.65999	-1.54551	-1.4615	-2.15333	-2.06164	-1.87364	-1.8626	-1.78089	-1.70508	-1.89469	1e-06
A0A0G2K9Q9	Keratin, type I cytoskeletal 17 OS=Rattus norvegicus OX=10116 GN=Krt17 PE=1 SV=1 - [A0A0G2K9Q9_RAT]	7	-2.21564	-2.34088	-2.08795	-1.89261	-2.18549	-1.89427	-1.79575	-1.97646	-2.13427	-1.96299	3e-06
A0JN25	Microtubule-associated protein OS=Rattus norvegicus OX=10116 GN=Mapt PE=1 SV=1 - [A0JN25_RAT]	2	-2.06559	-0.803853	-1.72166	-1.81101	-1.84994	-2.095	-1.9397	-1.99668	-1.60053	-1.97033	<0.000001
P07871	3-ketoacyl-CoA thiolase B, peroxisomal OS=Rattus norvegicus OX=10116 GN=Acaa1b PE=1 SV=2 - [THIKB_RAT]	2	-1.64035	-1.54906	-1.11119	-1.5067	-2.04419	-2.08181	-2.14443	-1.88267	-1.45182	-2.03828	<0.000001
A0A0G2K6S9	Myosin-11 OS=Rattus norvegicus OX=10116 GN=Myh11 PE=1 SV=1 - [A0A0G2K6S9_RAT]	54	-2.53933	-2.91091	-2.3938	-2.53853	-2.23288	-2.05872	-2.02511	-2.03913	-2.59564	-2.08896	<0.000001
G3V718	Whey acidic protein OS=Rattus norvegicus OX=10116 GN=Wap PE=4 SV=1 - [G3V718_RAT]	2	-1.38401	-1.45329	-1.547	-1.63991	-1.80027	-2.03513	-2.27849	-2.24222	-1.50605	-2.08903	7e-06
G3V9A3	RCG31390 OS=Rattus norvegicus OX=10116 GN=Sfn PE=3 SV=1 - [G3V9A3_RAT]	5	-2.49828	-1.88843	-1.75994	-1.8736	-2.14576	-2.24348	-1.93137	-2.09847	-2.00506	-2.10477	1e-06
D4ABY7	Uncharacterized protein OS=Rattus norvegicus OX=10116 PE=4 SV=2 - [D4ABY7_RAT]	4	-1.937	-1.86568	-2.1516	-1.69902	-2.1698	-2.09831	-2.10149	-2.05019	-1.91333	-2.10495	<0.000001
G3V8S6	Histidine rich calcium binding protein, isoform CRA_b OS=Rattus norvegicus OX=10116 GN=Hrc PE=1 SV=1 - [G3V8S6_RAT]	5	-1.8841	0	-0.290465	-3.81905	-2.17243	-2.01149	-2.22414	-2.09513	-1.4984	-2.1258	<0.000001
A0A0G2JUX2	ArfGAP with RhoGAP domain, ankyrin repeat and PH domain 3 OS=Rattus norvegicus OX=10116 GN=Arap3 PE=1 SV=1 - [A0A0G2JUX2_RAT]	2	-1.92858	0	0.318875	0	-3.06301	-1.72652	-1.7497	-2.13366	-0.402427	-2.16822	0.000432
A0A0G2JSR8	Cytochrome P450, family 17, subfamily a, polypeptide 1 OS=Rattus norvegicus OX=10116 GN=Cyp17a1 PE=1 SV=1 - [A0A0G2JSR8_RAT]	11	-2.38157	-1.89177	-2.02486	-2.66703	-2.34635	-2.2445	-2.09881	-2.02459	-2.24131	-2.17856	1e-06
F1LNA9	Colipase OS=Rattus norvegicus OX=10116 GN=Clps PE=4 SV=1 - [F1LNA9_RAT]	2	-0.945256	0	-2.9382	0.259393	-1.40629	-2.75503	-2.45108	-2.1491	-0.906015	-2.19037	0.000297
D4A3D2	RCG56113, isoform CRA_a OS=Rattus norvegicus OX=10116 GN=Smyd1 PE=4 SV=1 - [D4A3D2_RAT]	2	-2.40496	-3.28532	-0.20838	-3.52657	-2.87003	-2.03173	-2.10922	-1.9007	-2.35631	-2.22792	8.6e-05
P05183	Cytochrome P450 3A2 OS=Rattus norvegicus OX=10116 GN=Cyp3a2 PE=1 SV=2 - [CP3A2_RAT]	3	-2.85716	-2.45471	-2.20876	-2.05369	-2.42891	-2.1991	-1.95331	-2.33983	-2.39358	-2.23029	5e-06
A0A0G2K6P7	Keratin, type II cytoskeletal 4 OS=Rattus norvegicus OX=10116 GN=Krt4 PE=3 SV=1 - [A0A0G2K6P7_RAT]	12	-2.43556	-2.05155	-2.12215	-2.10377	-2.24325	-2.36879	-2.43289	-2.50451	-2.17826	-2.38736	<0.000001
P08721	Osteopontin OS=Rattus norvegicus OX=10116 GN=Spp1 PE=1 SV=2 - [OSTP_RAT]	7	-1.85219	-0.280569	-2.83878	-2.33803	-2.65937	-2.51287	-2.36968	-2.28344	-1.82739	-2.45634	1e-06
D3ZHQ6	Small proline-rich protein 3 OS=Rattus norvegicus OX=10116 GN=Sprr3 PE=4 SV=1 - [D3ZHQ6_RAT]	5	-3.11093	-2.32874	-2.10498	-1.99058	-2.54808	-2.66749	-2.40581	-2.61289	-2.38381	-2.55857	<0.000001
P07936	Neuromodulin OS=Rattus norvegicus OX=10116 GN=Gap43 PE=1 SV=1 - [NEUM_RAT]	3	-2.62826	-2.40715	-2.28849	-1.61117	-2.25004	-2.4789	-2.77261	-2.78497	-2.23377	-2.57163	6e-06
F6QBA3	Perilipin OS=Rattus norvegicus OX=10116 GN=Plin2 PE=1 SV=1 - [F6QBA3_RAT]	13	-2.82593	-2.61186	-2.73619	-2.41933	-2.69611	-2.83799	-2.86896	-2.81119	-2.64833	-2.80356	<0.000001
Q6IFV4	Keratin, type I cytoskeletal 13 OS=Rattus norvegicus OX=10116 GN=Krt13 PE=3 SV=1 - [K1C13_RAT]	12	-2.89197	-2.76559	-2.64693	-2.80792	-2.91564	-2.92127	-2.77554	-2.80463	-2.7781	-2.85427	<0.000001
B6DDJ9	MD2 (Fragment) OS=Rattus norvegicus OX=10116 PE=2 SV=1 - [B6DDJ9_RAT]	2	-2.35505	-3.76082	0.0527578	0	-4.25693	-2.77789	-2.35512	-2.66343	-1.51578	-3.01335	0.000395
D4A5U3	Protein-glutamine gamma-glutamyltransferase E OS=Rattus norvegicus OX=10116 GN=Tgm3 PE=3 SV=1 - [TGM3_RAT]	3	-3.88117	-3.03647	-3.02697	-3.24991	-3.37871	-3.16823	-2.93885	-3.50603	-3.29863	-3.24795	2e-06
A0A0G2K6D0	Lysine demethylase 6A OS=Rattus norvegicus OX=10116 GN=Kdm6a PE=1 SV=1 - [A0A0G2K6D0_RAT]	2	-3.10809	0	-0.503882	0	-3.08746	-3.56784	-2.82699	-3.65031	-0.902993	-3.28315	1.2e-05
D3ZWP4	Smoothelin-like 1 OS=Rattus norvegicus OX=10116 GN=Smtnl1 PE=1 SV=2 - [D3ZWP4_RAT]	2	-3.27734	0	-0.547846	0	-3.2971	-3.54552	-3.35603	-3.49053	-0.956297	-3.4223	<0.000001
Q08290	Calponin-1 OS=Rattus norvegicus OX=10116 GN=Cnn1 PE=1 SV=1 - [CNN1_RAT]	5	-4.40444	-4.30663	-3.42864	-3.09438	-3.22872	-3.70801	-3.88552	-3.88049	-3.80852	-3.67569	3e-06
G3V9L4	Glycosylation dependent cell adhesion molecule 1, isoform CRA_a OS=Rattus norvegicus OX=10116 GN=Glycam1 PE=4 SV=1 - [G3V9L4_RAT]	4	-3.43256	-4.53101	-3.98624	-3.76282	-3.92786	-3.76898	-3.74225	-4.17445	-3.92816	-3.90338	<0.000001
