# Supplementary material for: Liver Proteome Profile of Growth Restricted and Appropriately Grown Newborn Wistar Rats Associated with Maternal Undernutrition
Source: Preprints.org preprint supplement (doi:10.20944/preprints202103.0023.v1), 2021-03-01
Supplement: Supplementary file 4 [file Supp Table 4.xlsx]

## Sheet: common_q_2up_0.58
accession	Description	FGR vs.C	non-FGR vs. C
G3V8R3	Globin e1 OS=Rattus norvegicus OX=10116 GN=Hbz PE=3 SV=1 - [G3V8R3_RAT]	2.35044	1.42827
D3ZMT4	Histidine decarboxylase OS=Rattus norvegicus OX=10116 GN=Hdc PE=4 SV=3 - [D3ZMT4_RAT]	2.28094	1.18523
Q8R4A1	ERO1-like protein alpha OS=Rattus norvegicus OX=10116 GN=Ero1a PE=1 SV=1 - [ERO1A_RAT]	2.14007	0.884142
P01946	Hemoglobin subunit alpha-1/2 OS=Rattus norvegicus OX=10116 GN=Hba1 PE=1 SV=3 - [HBA_RAT]	1.91892	1.04241
O88752	Epsilon 1 globin OS=Rattus norvegicus OX=10116 GN=Hbe1 PE=1 SV=1 - [O88752_RAT]	1.85224	0.99308
Q63118	Calcitonin gene-related peptide type 1 receptor OS=Rattus norvegicus OX=10116 GN=Calcrl PE=2 SV=1 - [CALRL_RAT]	1.83147	0.683306
Q58HA5	Carbonic anhydrase XII (Fragment) OS=Rattus norvegicus OX=10116 PE=2 SV=1 - [Q58HA5_RAT]	1.70325	1.19673
O88754	Epsilon 3 globin OS=Rattus norvegicus OX=10116 GN=Hbg1 PE=2 SV=1 - [O88754_RAT]	1.51067	0.983509
Q6JE36	Protein NDRG1 OS=Rattus norvegicus OX=10116 GN=Ndrg1 PE=1 SV=1 - [NDRG1_RAT]	1.31994	1.0627
P04182	Ornithine aminotransferase, mitochondrial OS=Rattus norvegicus OX=10116 GN=Oat PE=1 SV=1 - [OAT_RAT]	1.31594	0.580631
A0A0F7R5I4	Alanine/serine/cysteine/threonine transporter 1 OS=Rattus norvegicus OX=10116 GN=ratASCT1 PE=2 SV=1 - [A0A0F7R5I4_RAT]	1.30841	0.70855
D4A3V0	Eva-1 homolog A, regulator of programmed cell death OS=Rattus norvegicus OX=10116 GN=Eva1a PE=1 SV=1 - [D4A3V0_RAT]	1.30211	1.47962
A0A0G2K2S2	Solute carrier family 2, facilitated glucose transporter member 1 OS=Rattus norvegicus OX=10116 GN=Slc2a1 PE=1 SV=1 - [A0A0G2K2S2_RAT]	1.25281	0.776751
Q9JHZ9	Sodium-coupled neutral amino acid transporter 3 OS=Rattus norvegicus OX=10116 GN=Slc38a3 PE=2 SV=1 - [S38A3_RAT]	1.22676	0.902134
Q71DI1	Dermcidin OS=Rattus norvegicus OX=10116 PE=2 SV=1 - [Q71DI1_RAT]	1.16232	0.757311
P17425	Hydroxymethylglutaryl-CoA synthase, cytoplasmic OS=Rattus norvegicus OX=10116 GN=Hmgcs1 PE=1 SV=1 - [HMCS1_RAT]	1.13763	0.644505
A0A096MJY1	Glypican 6 OS=Rattus norvegicus OX=10116 GN=Gpc6 PE=1 SV=1 - [A0A096MJY1_RAT]	1.11549	1.16896
O54953	Stearoyl-CoA desaturase 2 (Fragment) OS=Rattus norvegicus OX=10116 PE=2 SV=1 - [O54953_RAT]	1.0966	1.55598
D3ZQY4	FRY-like transcription coactivator OS=Rattus norvegicus OX=10116 GN=Fryl PE=1 SV=2 - [D3ZQY4_RAT]	1.04472	1.39767
D3ZI66	Ring finger protein 149 OS=Rattus norvegicus OX=10116 GN=Rnf149 PE=1 SV=1 - [D3ZI66_RAT]	1.02725	0.709072
B1H249	Glucosamine-phosphate N-acetyltransferase 1 OS=Rattus norvegicus OX=10116 GN=Gnpnat1 PE=1 SV=1 - [B1H249_RAT]	1.02685	0.631739
A0A0G2K6V6	Kinesin family member 16B OS=Rattus norvegicus OX=10116 GN=Kif16b PE=3 SV=1 - [A0A0G2K6V6_RAT]	1.02453	0.686894
A0A0A0MY09	Endoplasmin OS=Rattus norvegicus OX=10116 GN=Hsp90b1 PE=1 SV=1 - [A0A0A0MY09_RAT]	1.01354	0.662503
A0A0A0MXX1	A-kinase anchor protein 7 isoforms delta and gamma OS=Rattus norvegicus OX=10116 GN=Akap7 PE=4 SV=1 - [A0A0A0MXX1_RAT]	1.01142	0.786965
P40241	CD9 antigen OS=Rattus norvegicus OX=10116 GN=Cd9 PE=1 SV=2 - [CD9_RAT]	0.951856	1.11569
Q6P136	Hyou1 protein OS=Rattus norvegicus OX=10116 GN=Hyou1 PE=1 SV=1 - [Q6P136_RAT]	0.932285	0.677561
F1M3Q1	Interferon-induced transmembrane protein 1 OS=Rattus norvegicus OX=10116 GN=Ifitm1 PE=4 SV=2 - [F1M3Q1_RAT]	0.92649	0.608903
A0A0G2K8N3	Prolyl 3-hydroxylase 2 OS=Rattus norvegicus OX=10116 GN=P3h2 PE=1 SV=1 - [A0A0G2K8N3_RAT]	0.918594	0.662646
P56627	Aquaporin-9 OS=Rattus norvegicus OX=10116 GN=Aqp9 PE=2 SV=1 - [AQP9_RAT]	0.913121	1.12962
H9BFG4	Interleukin-6 receptor subunit beta OS=Rattus norvegicus OX=10116 GN=Il6st PE=2 SV=2 - [H9BFG4_RAT]	0.908126	0.811772
D4A678	Spectrin, alpha, erythrocytic 1 OS=Rattus norvegicus OX=10116 GN=Spta1 PE=1 SV=3 - [D4A678_RAT]	0.900489	0.638225
E0X583	Stabilin-2/HARE OS=Rattus norvegicus OX=10116 GN=Stab2 PE=2 SV=2 - [E0X583_RAT]	0.887287	0.674328
Q5XI36	CD97 molecule OS=Rattus norvegicus OX=10116 GN=Adgre5 PE=2 SV=1 - [Q5XI36_RAT]	0.86871	1.17789
Q63081	Protein disulfide-isomerase A6 OS=Rattus norvegicus OX=10116 GN=Pdia6 PE=1 SV=2 - [PDIA6_RAT]	0.858732	0.580378
B0BNN1	Gltpd2 protein OS=Rattus norvegicus OX=10116 GN=Gltpd2 PE=2 SV=1 - [B0BNN1_RAT]	0.843806	1.20694
B2RYD0	Ube2g2 protein OS=Rattus norvegicus OX=10116 GN=Ube2g2 PE=1 SV=1 - [B2RYD0_RAT]	0.840821	0.710118
Q5XI73	Rho GDP-dissociation inhibitor 1 OS=Rattus norvegicus OX=10116 GN=Arhgdia PE=1 SV=1 - [GDIR1_RAT]	0.83052	0.647211
G3V837	CD1d1 antigen OS=Rattus norvegicus OX=10116 GN=Cd1d1 PE=1 SV=1 - [G3V837_RAT]	0.829292	1.37854
O70352	CD82 antigen OS=Rattus norvegicus OX=10116 GN=Cd82 PE=1 SV=1 - [CD82_RAT]	0.814381	1.57339
B5DFA0	Vil1 protein OS=Rattus norvegicus OX=10116 GN=Vil1 PE=1 SV=1 - [B5DFA0_RAT]	0.807203	0.804949
P54921	Alpha-soluble NSF attachment protein OS=Rattus norvegicus OX=10116 GN=Napa PE=1 SV=2 - [SNAA_RAT]	0.793733	0.856276
D3ZE26	Similar to RIKEN cDNA 1110063G11 (Predicted) OS=Rattus norvegicus OX=10116 GN=Tmcc2 PE=1 SV=1 - [D3ZE26_RAT]	0.781752	0.738626
A0A0G2KB82	CCR4-NOT transcription complex, subunit 2 OS=Rattus norvegicus OX=10116 GN=Cnot2 PE=1 SV=1 - [A0A0G2KB82_RAT]	0.777432	0.599463
Q6IN10	Endothelin converting enzyme 1, isoform CRA_a OS=Rattus norvegicus OX=10116 GN=Ece1 PE=1 SV=1 - [Q6IN10_RAT]	0.77291	0.810993
Q63921	Prostaglandin G/H synthase 1 OS=Rattus norvegicus OX=10116 GN=Ptgs1 PE=2 SV=2 - [PGH1_RAT]	0.751883	0.604623
Q6PCU4	Emd protein OS=Rattus norvegicus OX=10116 GN=Emd PE=1 SV=1 - [Q6PCU4_RAT]	0.743913	0.940197
Q64244	ADP-ribosyl cyclase/cyclic ADP-ribose hydrolase 1 OS=Rattus norvegicus OX=10116 GN=Cd38 PE=1 SV=1 - [CD38_RAT]	0.733022	0.670717
P04937	Fibronectin OS=Rattus norvegicus OX=10116 GN=Fn1 PE=1 SV=2 - [FINC_RAT]	0.722346	0.635694
Q63135	Complement component receptor 1-like protein OS=Rattus norvegicus OX=10116 GN=Cr1l PE=1 SV=1 - [CR1L_RAT]	0.722329	0.83376
A0A0G2K6U1	Vesicle-fusing ATPase OS=Rattus norvegicus OX=10116 GN=Nsf PE=1 SV=1 - [A0A0G2K6U1_RAT]	0.720862	0.711245
D3ZF49	Transmembrane serine protease 6 OS=Rattus norvegicus OX=10116 GN=Tmprss6 PE=1 SV=1 - [D3ZF49_RAT]	0.712428	0.689404
B0BNN0	Tissue-specific transplantation antigen P35B OS=Rattus norvegicus OX=10116 GN=Tsta3 PE=1 SV=1 - [B0BNN0_RAT]	0.711854	0.658379
A0A140TAD7	JmjC domain-containing protein 8 OS=Rattus norvegicus OX=10116 GN=Jmjd8 PE=1 SV=1 - [A0A140TAD7_RAT]	0.700846	0.576758
E3W9F8	Laminin, alpha 1 OS=Rattus norvegicus OX=10116 GN=Lama1 PE=2 SV=1 - [E3W9F8_RAT]	0.699259	0.937392
Q6IMX7	Hsp70-binding protein 1 OS=Rattus norvegicus OX=10116 GN=Hspbp1 PE=1 SV=1 - [HPBP1_RAT]	0.694033	0.729556
Q5M7T6	V-type proton ATPase subunit OS=Rattus norvegicus OX=10116 GN=Atp6v0d1 PE=1 SV=1 - [Q5M7T6_RAT]	0.692734	0.629316
Q642B0	Glypican 4 OS=Rattus norvegicus OX=10116 GN=Gpc4 PE=1 SV=1 - [Q642B0_RAT]	0.683828	1.02368
A0A140TAB8	Tyrosine-protein kinase receptor OS=Rattus norvegicus OX=10116 GN=Igf1r PE=3 SV=1 - [A0A140TAB8_RAT]	0.680912	0.698202
Q5RK27	Solute carrier family 12 member 7 OS=Rattus norvegicus OX=10116 GN=Slc12a7 PE=2 SV=2 - [S12A7_RAT]	0.679911	0.760382
F1LW61	Hypothetical protein LOC691189 OS=Rattus norvegicus OX=10116 GN=LOC691189 PE=4 SV=3 - [F1LW61_RAT]	0.679437	0.952748
F1LUW0	Uncharacterized protein OS=Rattus norvegicus OX=10116 PE=4 SV=2 - [F1LUW0_RAT]	0.67304	0.747882
D3ZTJ0	Protein XRP2 OS=Rattus norvegicus OX=10116 GN=Rp2 PE=1 SV=3 - [D3ZTJ0_RAT]	0.666	0.853557
F7FF45	Nuclear mitotic apparatus protein 1 OS=Rattus norvegicus OX=10116 GN=Numa1 PE=1 SV=2 - [F7FF45_RAT]	0.657795	1.00791
Q68FQ6	Similar to RIKEN cDNA 1700011A15 OS=Rattus norvegicus OX=10116 GN=RGD1305207 PE=2 SV=1 - [Q68FQ6_RAT]	0.638445	1.26048
A0A096MK61	Cartilage-associated protein-like 1 OS=Rattus norvegicus OX=10116 GN=Crtapl1 PE=1 SV=1 - [A0A096MK61_RAT]	0.631785	0.894748
D3ZMI6	Olfactomedin 4 OS=Rattus norvegicus OX=10116 GN=Olfm4 PE=4 SV=1 - [D3ZMI6_RAT]	0.622991	0.802232
Q62931	Golgi SNAP receptor complex member 1 OS=Rattus norvegicus OX=10116 GN=Gosr1 PE=1 SV=1 - [GOSR1_RAT]	0.617993	0.630136
D3Z8M3	KH and NYN domain-containing OS=Rattus norvegicus OX=10116 GN=Khnyn PE=1 SV=1 - [D3Z8M3_RAT]	0.615417	0.746794
Q32KJ6	N-acetylgalactosamine-6-sulfatase OS=Rattus norvegicus OX=10116 GN=Galns PE=1 SV=1 - [GALNS_RAT]	0.612599	0.698369
D3ZJH9	Malic enzyme OS=Rattus norvegicus OX=10116 GN=Me2 PE=1 SV=1 - [D3ZJH9_RAT]	0.611753	0.818491
A0A0G2K5P1	Hepatocyte nuclear factor 4-alpha OS=Rattus norvegicus OX=10116 GN=Hnf4a PE=1 SV=1 - [A0A0G2K5P1_RAT]	0.609114	0.760634
Q641Z8	Peflin OS=Rattus norvegicus OX=10116 GN=Pef1 PE=2 SV=1 - [PEF1_RAT]	0.608547	0.575704
G3V9P3	Platelet receptor Gi24 OS=Rattus norvegicus OX=10116 GN=Vsir PE=1 SV=2 - [G3V9P3_RAT]	0.605823	0.862699
A0A0G2KAL6	Colony-stimulating factor 2 receptor alpha subunit OS=Rattus norvegicus OX=10116 GN=Csf2ra PE=1 SV=1 - [A0A0G2KAL6_RAT]	0.599966	0.713175
Q6IRF8	ATPase, H+ transporting, lysosomal accessory protein 1 OS=Rattus norvegicus OX=10116 GN=Atp6ap1 PE=1 SV=1 - [Q6IRF8_RAT]	0.597476	0.575658
Q9R175	Interferon-induced transmembrane protein 2 OS=Rattus norvegicus OX=10116 GN=Ifitm2 PE=1 SV=1 - [Q9R175_RAT]	0.586021	0.7199
Q5M9G1	Protein HEXIM1 OS=Rattus norvegicus OX=10116 GN=Hexim1 PE=1 SV=1 - [HEXI1_RAT]	-0.575644	-0.600508
A0A0G2JXM2	Cyclin-T1-like OS=Rattus norvegicus OX=10116 GN=LOC103692976 PE=4 SV=1 - [A0A0G2JXM2_RAT]	-0.585317	-0.902871
A0JPM9	Eukaryotic translation initiation factor 3 subunit J OS=Rattus norvegicus OX=10116 GN=Eif3j PE=1 SV=1 - [EIF3J_RAT]	-0.592793	-0.796037
P60825	Cold-inducible RNA-binding protein OS=Rattus norvegicus OX=10116 GN=Cirbp PE=2 SV=1 - [CIRBP_RAT]	-0.607146	-0.807123
F1M9A7	Acyl-coenzyme A oxidase OS=Rattus norvegicus OX=10116 GN=Acox3 PE=1 SV=2 - [F1M9A7_RAT]	-0.610046	-0.602805
Q5U2U7	mRNA cap guanine-N7 methyltransferase OS=Rattus norvegicus OX=10116 GN=Rnmt PE=1 SV=1 - [MCES_RAT]	-0.61121	-0.684866
Q5XIP6	Flap endonuclease 1 OS=Rattus norvegicus OX=10116 GN=Fen1 PE=2 SV=1 - [FEN1_RAT]	-0.615809	-0.627967
O35849	Lecithin cholesterol acyltransferase OS=Rattus norvegicus OX=10116 GN=Lcat PE=1 SV=1 - [O35849_RAT]	-0.618311	-0.738167
B2GUV5	V-type proton ATPase subunit G OS=Rattus norvegicus OX=10116 GN=Atp6v1g1 PE=1 SV=1 - [B2GUV5_RAT]	-0.618512	-1.10335
D3ZIL9	DIS3-like exonuclease 2 OS=Rattus norvegicus OX=10116 GN=Dis3l2 PE=1 SV=2 - [D3ZIL9_RAT]	-0.619279	-0.866333
Q498D5	Regulator of microtubule dynamics protein 2 OS=Rattus norvegicus OX=10116 GN=Rmdn2 PE=1 SV=1 - [RMD2_RAT]	-0.619457	-0.667071
P09811	Glycogen phosphorylase, liver form OS=Rattus norvegicus OX=10116 GN=Pygl PE=1 SV=5 - [PYGL_RAT]	-0.620893	-0.779696
D4A5F4	Hypothetical LOC289568 OS=Rattus norvegicus OX=10116 GN=RGD1311575 PE=1 SV=3 - [D4A5F4_RAT]	-0.628985	-0.892261
P29314	40S ribosomal protein S9 OS=Rattus norvegicus OX=10116 GN=Rps9 PE=1 SV=4 - [RS9_RAT]	-0.642741	-0.583624
Q9ES75	Proline-rich acidic protein 1 OS=Rattus norvegicus OX=10116 GN=Prap1 PE=2 SV=1 - [PRAP1_RAT]	-0.644359	-0.679632
Q5XIF3	NADH dehydrogenase [ubiquinone] iron-sulfur protein 4, mitochondrial OS=Rattus norvegicus OX=10116 GN=Ndufs4 PE=1 SV=1 - [NDUS4_RAT]	-0.649576	-1.04174
Q7TS56	Carbonyl reductase family member 4 OS=Rattus norvegicus OX=10116 GN=Cbr4 PE=2 SV=1 - [CBR4_RAT]	-0.656518	-0.626925
G3V644	NADH dehydrogenase (Ubiquinone) flavoprotein 3-like, isoform CRA_a OS=Rattus norvegicus OX=10116 GN=Ndufv3 PE=1 SV=1 - [G3V644_RAT]	-0.660206	-0.760407
Q6AY96	General transcription factor IIF subunit 1 OS=Rattus norvegicus OX=10116 GN=Gtf2f1 PE=1 SV=1 - [T2FA_RAT]	-0.66199	-0.647744
Q3MIB4	Lon protease homolog 2, peroxisomal OS=Rattus norvegicus OX=10116 GN=Lonp2 PE=1 SV=2 - [LONP2_RAT]	-0.662713	-0.802266
F1LMW7	Myristoylated alanine-rich C-kinase substrate OS=Rattus norvegicus OX=10116 GN=Marcks PE=1 SV=3 - [F1LMW7_RAT]	-0.662846	-0.631927
P35745	Acylphosphatase-2 OS=Rattus norvegicus OX=10116 GN=Acyp2 PE=1 SV=2 - [ACYP2_RAT]	-0.663961	-1.23672
P34926	Microtubule-associated protein 1A OS=Rattus norvegicus OX=10116 GN=Map1a PE=1 SV=1 - [MAP1A_RAT]	-0.671902	-0.677677
D4A885	ATP-binding cassette subfamily A member 13 OS=Rattus norvegicus OX=10116 GN=Abca13 PE=4 SV=3 - [D4A885_RAT]	-0.680575	-0.671973
G3V7V6	All-trans-13,14-dihydroretinol saturase, isoform CRA_b OS=Rattus norvegicus OX=10116 GN=Retsat PE=1 SV=1 - [G3V7V6_RAT]	-0.685963	-1.10846
P69736	Endothelial differentiation-related factor 1 OS=Rattus norvegicus OX=10116 GN=Edf1 PE=1 SV=1 - [EDF1_RAT]	-0.694295	-0.853315
O88867	Kynurenine 3-monooxygenase OS=Rattus norvegicus OX=10116 GN=Kmo PE=1 SV=1 - [KMO_RAT]	-0.697491	-0.603104
Q7M0C4	Cytochrome P450 2B4 (Fragments) OS=Rattus norvegicus OX=10116 PE=4 SV=1 - [Q7M0C4_RAT]	-0.69767	-1.07469
G3V7Q8	Cationic trypsinogen OS=Rattus norvegicus OX=10116 GN=Prss3b PE=3 SV=1 - [G3V7Q8_RAT]	-0.70639	-0.77908
Q4KM62	Palmdelphin OS=Rattus norvegicus OX=10116 GN=Palmd PE=1 SV=1 - [PALMD_RAT]	-0.707648	-1.17167
Q2MH90	14.7K-interacting protein-2 type B variant (Fragment) OS=Rattus norvegicus OX=10116 GN=FIP-2B variant PE=2 SV=1 - [Q2MH90_RAT]	-0.716232	-1.05245
Q64550	UDP-glucuronosyltransferase 1-1 OS=Rattus norvegicus OX=10116 GN=Ugt1a1 PE=1 SV=1 - [UD11_RAT]	-0.7239	-0.827265
B2RZD5	RCG41580, isoform CRA_a OS=Rattus norvegicus OX=10116 GN=Rpl22l1 PE=2 SV=1 - [B2RZD5_RAT]	-0.751313	-0.776767
D4A5T8	Periplakin OS=Rattus norvegicus OX=10116 GN=Ppl PE=1 SV=1 - [D4A5T8_RAT]	-0.75279	-0.761267
Q62785	28 kDa heat- and acid-stable phosphoprotein OS=Rattus norvegicus OX=10116 GN=Pdap1 PE=1 SV=1 - [HAP28_RAT]	-0.753317	-1.08629
F1LTB8	UDP-glucuronosyltransferase OS=Rattus norvegicus OX=10116 GN=RGD1559459 PE=1 SV=2 - [F1LTB8_RAT]	-0.753793	-0.678938
D3ZSU6	Ankyrin repeat domain 11 OS=Rattus norvegicus OX=10116 GN=Ankrd11 PE=1 SV=3 - [D3ZSU6_RAT]	-0.758919	-0.736915
B0BNB2	Density-regulated protein OS=Rattus norvegicus OX=10116 GN=Denr PE=2 SV=1 - [B0BNB2_RAT]	-0.771749	-1.06071
Q5M949	Nipsnap homolog 3A (C. elegans) OS=Rattus norvegicus OX=10116 GN=Nipsnap3b PE=1 SV=1 - [Q5M949_RAT]	-0.775542	-0.903671
Q63276	Bile acid-CoA:amino acid N-acyltransferase OS=Rattus norvegicus OX=10116 GN=Baat PE=1 SV=2 - [BAAT_RAT]	-0.778221	-0.902047
A0A0G2K3Y9	Megakaryoblastic leukemia (Translocation) 1 (Predicted) OS=Rattus norvegicus OX=10116 GN=Mkl1 PE=1 SV=1 - [A0A0G2K3Y9_RAT]	-0.79262	-0.59674
A0A096MIS3	Translation initiation factor eIF-2B subunit delta OS=Rattus norvegicus OX=10116 GN=Eif2b4 PE=1 SV=2 - [A0A096MIS3_RAT]	-0.797979	-0.94156
M0RA79	Uncharacterized protein OS=Rattus norvegicus OX=10116 PE=1 SV=1 - [M0RA79_RAT]	-0.799508	-1.17248
Q0D2L3	Agmatinase, mitochondrial OS=Rattus norvegicus OX=10116 GN=Agmat PE=2 SV=1 - [SPEB_RAT]	-0.805108	-1.2246
O35826	Bifunctional UDP-N-acetylglucosamine 2-epimerase/N-acetylmannosamine kinase OS=Rattus norvegicus OX=10116 GN=Gne PE=1 SV=1 - [GLCNE_RAT]	-0.811732	-0.802002
D4ABW9	Tripartite motif protein 29 (Predicted), isoform CRA_b OS=Rattus norvegicus OX=10116 GN=Trim29 PE=4 SV=1 - [D4ABW9_RAT]	-0.812932	-1.39162
Q5I0N5	Agxt protein (Fragment) OS=Rattus norvegicus OX=10116 GN=Agxt PE=2 SV=1 - [Q5I0N5_RAT]	-0.826705	-0.687153
M0RCH6	Uncharacterized protein OS=Rattus norvegicus OX=10116 PE=1 SV=2 - [M0RCH6_RAT]	-0.838286	-0.764984
F1LZ34	S-adenosylmethionine synthase OS=Rattus norvegicus OX=10116 GN=Mat1a PE=1 SV=3 - [F1LZ34_RAT]	-0.844368	-0.982192
P02692	Fatty acid-binding protein, liver OS=Rattus norvegicus OX=10116 GN=Fabp1 PE=1 SV=1 - [FABPL_RAT]	-0.847482	-1.48672
Q6SKG1	Acyl-coenzyme A synthetase ACSM3, mitochondrial OS=Rattus norvegicus OX=10116 GN=Acsm3 PE=2 SV=1 - [ACSM3_RAT]	-0.851022	-0.685101
M0RA15	Uncharacterized protein OS=Rattus norvegicus OX=10116 PE=4 SV=1 - [M0RA15_RAT]	-0.855782	-0.953725
O89035	Mitochondrial dicarboxylate carrier OS=Rattus norvegicus OX=10116 GN=Slc25a10 PE=1 SV=1 - [O89035_RAT]	-0.868784	-0.871048
D3ZIQ1	Acyl-CoA thioesterase 4 OS=Rattus norvegicus OX=10116 GN=Acot4 PE=1 SV=1 - [D3ZIQ1_RAT]	-0.870027	-1.18235
O35186	Cathepsin K OS=Rattus norvegicus OX=10116 GN=Ctsk PE=2 SV=1 - [CATK_RAT]	-0.884015	-0.880366
Q5XIB1	Protein TSSC4 OS=Rattus norvegicus OX=10116 GN=Tssc4 PE=2 SV=1 - [TSSC4_RAT]	-0.884921	-0.709773
B5DF03	Peptidylprolyl isomerase (Fragment) OS=Rattus norvegicus OX=10116 GN=Fkbp3 PE=2 SV=1 - [B5DF03_RAT]	-0.890483	-1.00702
P19225	Cytochrome P450 2C70 OS=Rattus norvegicus OX=10116 GN=Cyp2c70 PE=2 SV=1 - [CP270_RAT]	-0.89325	-0.994337
G3V9G5	RCG24674, isoform CRA_b OS=Rattus norvegicus OX=10116 GN=Synm PE=1 SV=2 - [G3V9G5_RAT]	-0.894135	-1.02836
Q923W4	Hepatoma-derived growth factor-related protein 3 OS=Rattus norvegicus OX=10116 GN=Hdgfl3 PE=1 SV=1 - [HDGR3_RAT]	-0.901235	-0.752136
P38062	Methionine aminopeptidase 2 OS=Rattus norvegicus OX=10116 GN=Metap2 PE=1 SV=2 - [MAP2_RAT]	-0.913932	-1.14498
P01015	Angiotensinogen OS=Rattus norvegicus OX=10116 GN=Agt PE=1 SV=1 - [ANGT_RAT]	-0.919415	-0.957344
G3V778	Pyruvate dehydrogenase kinase, isoenzyme 4 OS=Rattus norvegicus OX=10116 GN=Pdk4 PE=1 SV=1 - [G3V778_RAT]	-0.924466	-0.988054
A0A0H2UHH2	Serum amyloid P-component OS=Rattus norvegicus OX=10116 GN=Apcs PE=1 SV=1 - [A0A0H2UHH2_RAT]	-0.930448	-0.762615
P47875	Cysteine and glycine-rich protein 1 OS=Rattus norvegicus OX=10116 GN=Csrp1 PE=1 SV=2 - [CSRP1_RAT]	-0.936208	-0.709805
Q66H31	Hypothetical LOC287798, isoform CRA_a OS=Rattus norvegicus OX=10116 GN=MGC95210 PE=2 SV=1 - [Q66H31_RAT]	-0.95057	-0.974982
P55006	Retinol dehydrogenase 7 OS=Rattus norvegicus OX=10116 GN=Rdh7 PE=1 SV=1 - [RDH7_RAT]	-0.955624	-0.610315
P18163	Long-chain-fatty-acid--CoA ligase 1 OS=Rattus norvegicus OX=10116 GN=Acsl1 PE=1 SV=1 - [ACSL1_RAT]	-0.955714	-0.905624
P04550	Parathymosin OS=Rattus norvegicus OX=10116 GN=Ptms PE=1 SV=2 - [PTMS_RAT]	-0.957889	-1.09772
Q6AYD6	PDZ and LIM domain protein 2 OS=Rattus norvegicus OX=10116 GN=Pdlim2 PE=1 SV=1 - [PDLI2_RAT]	-0.95979	-1.01127
E9PU10	Interferon gamma-inducible protein 47 OS=Rattus norvegicus OX=10116 GN=Ifi47 PE=1 SV=3 - [E9PU10_RAT]	-0.972122	-0.620535
D3ZCP9	Transcription initiation factor IIE subunit beta OS=Rattus norvegicus OX=10116 GN=Gtf2e2 PE=1 SV=1 - [D3ZCP9_RAT]	-0.986499	-0.711322
D3ZVD7	Keratocan OS=Rattus norvegicus OX=10116 GN=Kera PE=4 SV=1 - [D3ZVD7_RAT]	-0.986977	-0.611235
D4ABA5	RCG35999, isoform CRA_a OS=Rattus norvegicus OX=10116 GN=Smtn PE=1 SV=1 - [D4ABA5_RAT]	-0.988108	-0.796866
A0A140TAE1	Fatty acid desaturase 2 OS=Rattus norvegicus OX=10116 GN=Fads2 PE=1 SV=1 - [A0A140TAE1_RAT]	-0.995411	-0.81212
A0A0G2K0Q7	Myosin light chain kinase OS=Rattus norvegicus OX=10116 GN=Mylk PE=1 SV=1 - [A0A0G2K0Q7_RAT]	-1.00146	-0.842726
Q00981	Ubiquitin carboxyl-terminal hydrolase isozyme L1 OS=Rattus norvegicus OX=10116 GN=Uchl1 PE=1 SV=2 - [UCHL1_RAT]	-1.00164	-0.713342
A0A0G2K654	Histone cluster 1 H1 family member c OS=Rattus norvegicus OX=10116 GN=Hist1h1c PE=1 SV=1 - [A0A0G2K654_RAT]	-1.02583	-0.765185
P02454	Collagen alpha-1(I) chain OS=Rattus norvegicus OX=10116 GN=Col1a1 PE=1 SV=5 - [CO1A1_RAT]	-1.04024	-0.617869
P54318	Pancreatic lipase-related protein 2 OS=Rattus norvegicus OX=10116 GN=Pnliprp2 PE=1 SV=1 - [LIPR2_RAT]	-1.04131	-1.29882
Q9JI04	Alpha 4 type V collagen OS=Rattus norvegicus OX=10116 GN=Col5a3 PE=2 SV=1 - [Q9JI04_RAT]	-1.05009	-0.779454
P24008	3-oxo-5-alpha-steroid 4-dehydrogenase 1 OS=Rattus norvegicus OX=10116 GN=Srd5a1 PE=1 SV=2 - [S5A1_RAT]	-1.05042	-1.18382
A0A0G2KAN1	Collagen, type I, alpha 2 OS=Rattus norvegicus OX=10116 GN=NEWGENE_621351 PE=1 SV=1 - [A0A0G2KAN1_RAT]	-1.05378	-0.578878
A2VCW9	Alpha-aminoadipic semialdehyde synthase, mitochondrial OS=Rattus norvegicus OX=10116 GN=Aass PE=2 SV=1 - [AASS_RAT]	-1.06309	-0.59302
Q5QD51	A-kinase anchor protein 12 OS=Rattus norvegicus OX=10116 GN=Akap12 PE=1 SV=1 - [AKA12_RAT]	-1.07457	-0.867332
Q5M7V3	LOC367586 protein OS=Rattus norvegicus OX=10116 GN=LOC367586 PE=2 SV=1 - [Q5M7V3_RAT]	-1.083	-0.867672
O70127	Bile salt export pump OS=Rattus norvegicus OX=10116 GN=Abcb11 PE=1 SV=1 - [ABCBB_RAT]	-1.08385	-0.84455
D3ZAF5	Periostin OS=Rattus norvegicus OX=10116 GN=Postn PE=1 SV=1 - [D3ZAF5_RAT]	-1.12227	-0.789618
P14659	Heat shock-related 70 kDa protein 2 OS=Rattus norvegicus OX=10116 GN=Hspa2 PE=1 SV=2 - [HSP72_RAT]	-1.12825	-0.605421
D3ZAM3	Carboxypeptidase B OS=Rattus norvegicus OX=10116 GN=Cpb1 PE=4 SV=2 - [D3ZAM3_RAT]	-1.15145	-1.27433
B0BMS8	Myl9 protein OS=Rattus norvegicus OX=10116 GN=Myl9 PE=1 SV=1 - [B0BMS8_RAT]	-1.16192	-0.994257
D4A412	Uncharacterized protein OS=Rattus norvegicus OX=10116 PE=4 SV=1 - [D4A412_RAT]	-1.17575	-0.907093
P12939	Cytochrome P450 2D10 OS=Rattus norvegicus OX=10116 GN=Cyp2d10 PE=1 SV=1 - [CP2DA_RAT]	-1.18029	-0.680416
Q3MIE1	Mpnd protein (Fragment) OS=Rattus norvegicus OX=10116 GN=Mpnd PE=2 SV=1 - [Q3MIE1_RAT]	-1.19045	-0.829687
P31232	Transgelin OS=Rattus norvegicus OX=10116 GN=Tagln PE=1 SV=2 - [TAGL_RAT]	-1.19161	-0.830031
H2BF30	Fatty acid desaturase 1 OS=Rattus norvegicus OX=10116 GN=Fads1 PE=2 SV=1 - [H2BF30_RAT]	-1.19409	-0.904264
D3ZSH7	Collagen type XVII alpha 1 chain OS=Rattus norvegicus OX=10116 GN=Col17a1 PE=4 SV=2 - [D3ZSH7_RAT]	-1.20818	-1.49631
P23565	Alpha-internexin OS=Rattus norvegicus OX=10116 GN=Ina PE=1 SV=2 - [AINX_RAT]	-1.22265	-1.29647
F7FEM5	Suprabasin OS=Rattus norvegicus OX=10116 GN=Sbsn PE=1 SV=1 - [F7FEM5_RAT]	-1.23309	-1.12693
F1LRL9	Microtubule-associated protein 1B OS=Rattus norvegicus OX=10116 GN=Map1b PE=1 SV=1 - [F1LRL9_RAT]	-1.27538	-1.19706
D3ZUU6	C-type lectin domain family 3, member B OS=Rattus norvegicus OX=10116 GN=Clec3b PE=1 SV=1 - [D3ZUU6_RAT]	-1.28687	-1.01492
G3V976	Carboxypeptidase A2 OS=Rattus norvegicus OX=10116 GN=Cpa2 PE=4 SV=1 - [G3V976_RAT]	-1.3019	-1.68804
D4A2G6	Thrombospondin 2 OS=Rattus norvegicus OX=10116 GN=Thbs2 PE=4 SV=2 - [D4A2G6_RAT]	-1.30541	-0.731486
D3ZJB1	Microfibril-associated protein 5 OS=Rattus norvegicus OX=10116 GN=Mfap5 PE=4 SV=1 - [D3ZJB1_RAT]	-1.31029	-0.862576
P63090	Pleiotrophin OS=Rattus norvegicus OX=10116 GN=Ptn PE=1 SV=1 - [PTN_RAT]	-1.33298	-0.604307
Q5FVG5	Similar to tropomyosin 1, embryonic fibroblast-rat, isoform CRA_c OS=Rattus norvegicus OX=10116 GN=Tpm2 PE=2 SV=1 - [Q5FVG5_RAT]	-1.33331	-0.74571
D3ZIC4	Protein phosphatase 1, regulatory (Inhibitor) subunit 12B (Predicted) OS=Rattus norvegicus OX=10116 GN=Ppp1r12b PE=1 SV=1 - [D3ZIC4_RAT]	-1.34088	-1.19399
D3ZJ17	Tubulin tyrosine ligase-like 6 OS=Rattus norvegicus OX=10116 GN=Ttll6 PE=4 SV=2 - [D3ZJ17_RAT]	-1.3486	-0.898601
A0A0G2K0M8	Neural cell adhesion molecule 1 OS=Rattus norvegicus OX=10116 GN=Ncam1 PE=1 SV=1 - [A0A0G2K0M8_RAT]	-1.35345	-1.13691
Q923Z2	Tropomyosin 1, alpha, isoform CRA_a OS=Rattus norvegicus OX=10116 GN=Tpm1 PE=1 SV=1 - [Q923Z2_RAT]	-1.38704	-1.08253
Q9ES38	Bile acyl-CoA synthetase OS=Rattus norvegicus OX=10116 GN=Slc27a5 PE=1 SV=1 - [S27A5_RAT]	-1.40884	-0.771398
F1LQC1	Acyl-coenzyme A oxidase OS=Rattus norvegicus OX=10116 GN=Acox1 PE=1 SV=3 - [F1LQC1_RAT]	-1.41426	-1.44854
Q01129	Decorin OS=Rattus norvegicus OX=10116 GN=Dcn PE=1 SV=1 - [PGS2_RAT]	-1.41636	-0.630054
D3ZE04	Collagen type VII alpha 1 chain OS=Rattus norvegicus OX=10116 GN=Col7a1 PE=4 SV=2 - [D3ZE04_RAT]	-1.4285	-0.962893
P32198	Carnitine O-palmitoyltransferase 1, liver isoform OS=Rattus norvegicus OX=10116 GN=Cpt1a PE=1 SV=2 - [CPT1A_RAT]	-1.44495	-1.35204
P07871	3-ketoacyl-CoA thiolase B, peroxisomal OS=Rattus norvegicus OX=10116 GN=Acaa1b PE=1 SV=2 - [THIKB_RAT]	-1.45182	-2.03828
F1LRM7	Collagen alpha-1(II) chain OS=Rattus norvegicus OX=10116 GN=Col2a1 PE=1 SV=1 - [F1LRM7_RAT]	-1.45483	-0.83178
G3V7S2	Neurofilament medium polypeptide OS=Rattus norvegicus OX=10116 GN=Nefm PE=1 SV=3 - [G3V7S2_RAT]	-1.45606	-1.18566
G3V718	Whey acidic protein OS=Rattus norvegicus OX=10116 GN=Wap PE=4 SV=1 - [G3V718_RAT]	-1.50605	-2.08903
Q6P6Q2	Keratin, type II cytoskeletal 5 OS=Rattus norvegicus OX=10116 GN=Krt5 PE=1 SV=1 - [K2C5_RAT]	-1.52459	-1.68124
A0A0G2JXJ9	Keratin, type I cytoskeletal 14 OS=Rattus norvegicus OX=10116 GN=Krt14 PE=1 SV=1 - [A0A0G2JXJ9_RAT]	-1.54211	-0.98035
P21807	Peripherin OS=Rattus norvegicus OX=10116 GN=Prph PE=1 SV=1 - [PERI_RAT]	-1.57639	-1.36451
A0JN25	Microtubule-associated protein OS=Rattus norvegicus OX=10116 GN=Mapt PE=1 SV=1 - [A0JN25_RAT]	-1.60053	-1.97033
A0A0G2K5J0	Sulfotransferase OS=Rattus norvegicus OX=10116 GN=Sult1c3 PE=1 SV=1 - [A0A0G2K5J0_RAT]	-1.60643	-1.51288
Q920P6	Adenosine deaminase OS=Rattus norvegicus OX=10116 GN=Ada PE=1 SV=3 - [ADA_RAT]	-1.63433	-1.87227
P70566	Tropomodulin-2 OS=Rattus norvegicus OX=10116 GN=Tmod2 PE=1 SV=1 - [TMOD2_RAT]	-1.64354	-1.39091
Q4FZU2	Keratin, type II cytoskeletal 6A OS=Rattus norvegicus OX=10116 GN=Krt6a PE=1 SV=1 - [K2C6A_RAT]	-1.64904	-1.89195
F1M7G5	Sulfotransferase OS=Rattus norvegicus OX=10116 GN=Sult2a6 PE=1 SV=3 - [F1M7G5_RAT]	-1.6739	-0.587088
P07379	Phosphoenolpyruvate carboxykinase, cytosolic [GTP] OS=Rattus norvegicus OX=10116 GN=Pck1 PE=1 SV=1 - [PCKGC_RAT]	-1.70508	-1.89469
Q5XIL2	Phosphatidylinositol 4-kinase type 2-beta OS=Rattus norvegicus OX=10116 GN=Pi4k2b PE=2 SV=1 - [P4K2B_RAT]	-1.74982	-1.564
P08721	Osteopontin OS=Rattus norvegicus OX=10116 GN=Spp1 PE=1 SV=2 - [OSTP_RAT]	-1.82739	-2.45634
P97586	Cell growth regulator with EF hand domain protein 1 OS=Rattus norvegicus OX=10116 GN=Cgref1 PE=1 SV=1 - [CGRE1_RAT]	-1.83307	-1.78734
B0BNF9	Hydroxyacid oxidase 1 OS=Rattus norvegicus OX=10116 GN=Hao1 PE=1 SV=1 - [B0BNF9_RAT]	-1.91095	-0.716156
D4ABY7	Uncharacterized protein OS=Rattus norvegicus OX=10116 PE=4 SV=2 - [D4ABY7_RAT]	-1.91333	-2.10495
P07896	Peroxisomal bifunctional enzyme OS=Rattus norvegicus OX=10116 GN=Ehhadh PE=1 SV=2 - [ECHP_RAT]	-1.92114	-1.78002
A0A0G2K5X9	Cytochrome P450 2E1 OS=Rattus norvegicus OX=10116 GN=Cyp2e1 PE=1 SV=1 - [A0A0G2K5X9_RAT]	-2.00225	-1.45142
G3V9A3	RCG31390 OS=Rattus norvegicus OX=10116 GN=Sfn PE=3 SV=1 - [G3V9A3_RAT]	-2.00506	-2.10477
P55159	Serum paraoxonase/arylesterase 1 OS=Rattus norvegicus OX=10116 GN=Pon1 PE=1 SV=3 - [PON1_RAT]	-2.04376	-1.15758
Q6IFV3	Keratin, type I cytoskeletal 15 OS=Rattus norvegicus OX=10116 GN=Krt15 PE=1 SV=1 - [K1C15_RAT]	-2.05641	-1.87383
Q9JJ09	Sodium-dependent phosphate transport protein 2B OS=Rattus norvegicus OX=10116 GN=Slc34a2 PE=1 SV=1 - [NPT2B_RAT]	-2.09462	-1.67341
A0A0G2K9Q9	Keratin, type I cytoskeletal 17 OS=Rattus norvegicus OX=10116 GN=Krt17 PE=1 SV=1 - [A0A0G2K9Q9_RAT]	-2.13427	-1.96299
A0A0G2K6P7	Keratin, type II cytoskeletal 4 OS=Rattus norvegicus OX=10116 GN=Krt4 PE=3 SV=1 - [A0A0G2K6P7_RAT]	-2.17826	-2.38736
P07936	Neuromodulin OS=Rattus norvegicus OX=10116 GN=Gap43 PE=1 SV=1 - [NEUM_RAT]	-2.23377	-2.57163
A0A0G2JSR8	Cytochrome P450, family 17, subfamily a, polypeptide 1 OS=Rattus norvegicus OX=10116 GN=Cyp17a1 PE=1 SV=1 - [A0A0G2JSR8_RAT]	-2.24131	-2.17856
P09875	UDP-glucuronosyltransferase 2B1 OS=Rattus norvegicus OX=10116 GN=Ugt2b1 PE=2 SV=1 - [UD2B1_RAT]	-2.26111	-1.07466
D3ZHQ6	Small proline-rich protein 3 OS=Rattus norvegicus OX=10116 GN=Sprr3 PE=4 SV=1 - [D3ZHQ6_RAT]	-2.38381	-2.55857
P05183	Cytochrome P450 3A2 OS=Rattus norvegicus OX=10116 GN=Cyp3a2 PE=1 SV=2 - [CP3A2_RAT]	-2.39358	-2.23029
A0A0G2K6S9	Myosin-11 OS=Rattus norvegicus OX=10116 GN=Myh11 PE=1 SV=1 - [A0A0G2K6S9_RAT]	-2.59564	-2.08896
F6QBA3	Perilipin OS=Rattus norvegicus OX=10116 GN=Plin2 PE=1 SV=1 - [F6QBA3_RAT]	-2.64833	-2.80356
Q6IFV4	Keratin, type I cytoskeletal 13 OS=Rattus norvegicus OX=10116 GN=Krt13 PE=3 SV=1 - [K1C13_RAT]	-2.7781	-2.85427
D4A5U3	Protein-glutamine gamma-glutamyltransferase E OS=Rattus norvegicus OX=10116 GN=Tgm3 PE=3 SV=1 - [TGM3_RAT]	-3.29863	-3.24795
Q08290	Calponin-1 OS=Rattus norvegicus OX=10116 GN=Cnn1 PE=1 SV=1 - [CNN1_RAT]	-3.80852	-3.67569
G3V9L4	Glycosylation dependent cell adhesion molecule 1, isoform CRA_a OS=Rattus norvegicus OX=10116 GN=Glycam1 PE=4 SV=1 - [G3V9L4_RAT]	-3.92816	-3.90338
